# Supplementary material for: The Role of Conformational Dynamics and Allostery in the Control of Distinct Efficacies of Agonists to the Glucocorticoid Receptor
Source: Front Mol Biosci. 2022 Jul 7;9:933676. doi: 10.3389/fmolb.2022.933676 (PMC9300934; doi:10.3389/fmolb.2022.933676)
Supplement: Supplementary file 2 [file DataSheet1.XLSX]

## Sheet: Fig2
	RMSD of dex-bound system					RMSD of AZ938-bound system					RMSD of pred-bound system					RMSD of cor-bound system					RMSD of dibC-bound system
Frame	round 1	round 2	round 3		Frame	round1	round2	round3		Frame	round1	round2	round3		Frame	round1	round2	round3		Frame	round1	round2	round3
1	1.1401	2.5153	2.4913		1	0	0	0		1	1.3454	2.349	2.7796		1	1.5478	2.8858	2.9882		1	1.0979	2.2846	2.9284
2	1.9518	2.5182	2.6768		2	0.7702	1.539	0.7931		2	1.8546	2.31	2.7455		2	2.1466	2.8706	2.9176		2	1.4377	2.225	2.9356
3	1.9192	2.5069	2.7973		3	0.7561	1.3268	0.7953		3	2.2045	2.5121	2.5717		3	2.1345	2.9544	2.8487		3	1.5935	2.2594	2.921
4	2.2545	2.4709	2.636		4	1.0573	1.7827	1.0274		4	2.1539	2.403	2.8677		4	2.5064	2.9153	2.8847		4	1.6854	2.2683	3.0236
5	2.3636	2.4547	2.5392		5	0.9148	1.6285	1.0956		5	2.3554	2.3892	2.6726		5	2.005	2.8686	2.9143		5	1.6451	2.2527	3.0084
6	2.5136	2.6661	2.67		6	0.9106	1.796	0.9153		6	2.5539	2.4521	2.8307		6	1.965	3.0111	2.9187		6	1.7926	2.4832	3.0586
7	2.6478	2.429	2.5511		7	0.7966	1.6489	0.8585		7	2.3241	2.2955	2.9936		7	2.2595	2.8592	2.8732		7	1.6814	2.5454	3.0567
8	2.4026	2.7177	2.7944		8	0.8993	1.6249	0.947		8	2.4006	2.2851	3.1038		8	2.2528	2.873	2.9121		8	1.8669	2.3594	3.0203
9	2.3545	2.273	2.7613		9	1.0891	1.7486	1.0257		9	2.4028	2.3528	3.1504		9	2.3617	2.9432	2.8823		9	2.0065	2.4665	3.0388
10	2.789	2.2137	2.7293		10	0.9097	1.543	0.8641		10	2.4519	2.2313	2.9879		10	2.3335	3.0047	2.9636		10	1.8692	2.4094	2.8525
11	2.7197	2.3914	2.8029		11	0.9472	1.6889	1.0807		11	2.6468	2.3536	3.0018		11	2.3761	2.8157	2.8989		11	1.9139	2.3074	3.0377
12	2.779	2.6507	2.9823		12	0.9883	1.5465	1.0616		12	2.4535	2.3902	2.9616		12	2.2607	2.901	2.8831		12	1.9004	2.2496	2.9847
13	2.9939	2.3046	2.9252		13	0.9985	1.7128	1.0701		13	2.4169	2.3759	2.906		13	2.2061	2.8921	2.8775		13	1.9411	2.3618	3.0305
14	2.2403	2.4579	2.8049		14	0.8727	1.66	0.9939		14	2.4442	2.2287	2.8635		14	2.2504	2.8119	2.8069		14	1.9111	2.3426	3.0239
15	2.7845	2.3501	2.804		15	1.1374	1.3803	0.8622		15	2.4501	2.2241	2.9819		15	2.2047	2.8889	2.8335		15	1.7869	2.4406	2.8991
16	2.5093	2.6458	2.5973		16	1.0447	1.9425	0.9155		16	2.4679	2.2428	3.0455		16	2.277	3.0287	2.8395		16	1.9492	2.3046	3.0022
17	2.8177	2.77	2.7791		17	1.141	1.7638	1.0128		17	2.4887	2.2182	2.9988		17	2.223	2.9444	2.8222		17	2.1	2.3882	2.9591
18	2.8552	2.8965	2.8255		18	1.0072	1.7273	0.9828		18	2.4342	2.3103	3.044		18	2.4387	3.0425	2.806		18	1.9041	2.5151	2.9938
19	2.9662	2.9338	2.7603		19	1.1295	1.7271	1.498		19	2.3859	2.3894	2.9826		19	2.3552	2.8793	2.804		19	1.6805	2.3694	2.9976
20	2.809	2.8294	2.7118		20	0.922	1.5908	0.9199		20	2.3327	2.6873	2.9018		20	2.4676	2.9816	2.8953		20	1.8636	2.4009	2.8668
21	2.6612	2.8382	2.7558		21	0.9651	2.0186	1.0256		21	2.1581	2.4932	2.8615		21	2.6026	2.9983	2.7798		21	1.8664	2.3477	3.0289
22	2.94	2.9243	2.5938		22	0.865	1.69	1.2006		22	2.4584	2.525	2.9728		22	2.6143	2.9641	2.8233		22	1.7441	2.3034	2.9541
23	2.9217	2.7037	2.5858		23	1.2135	1.9354	1.047		23	2.6433	2.5832	3.003		23	2.6135	2.9653	2.7475		23	1.8079	2.304	2.9438
24	2.7402	2.7915	2.6289		24	0.9688	1.9972	1.108		24	2.2804	2.6847	2.7629		24	2.7529	3.0218	2.7759		24	1.9328	2.2565	2.8656
25	2.748	2.7292	2.6707		25	0.9651	1.9222	1.3411		25	2.4949	2.6717	2.8395		25	2.7501	2.7225	2.7879		25	2.1329	2.2814	3.0676
26	2.9537	2.6569	2.497		26	0.9304	2.1293	1.3264		26	2.4635	2.7503	2.8353		26	2.6404	2.9507	2.879		26	1.81	2.3329	2.9746
27	2.5436	2.6831	2.6047		27	1.1308	2.0282	1.2263		27	2.4746	2.8121	2.8377		27	2.5524	2.898	2.9071		27	1.8814	2.3717	3.0214
28	2.2628	2.5742	2.9923		28	1.3085	2.0389	1.1292		28	2.7072	2.5203	2.9043		28	2.796	2.7989	2.8306		28	1.842	2.2798	3.0421
29	2.2284	2.4213	2.7294		29	1.1801	2.0296	0.9731		29	2.6648	2.6892	2.9136		29	2.7279	2.9254	2.8715		29	2.0049	2.281	3.0023
30	2.1276	2.529	2.623		30	1.1738	2.1662	0.9755		30	2.6178	2.7837	2.8583		30	2.538	2.8391	2.8989		30	1.76	2.2967	3.0369
31	1.9959	2.7527	2.576		31	1.1247	2.0753	0.9866		31	2.8016	2.6696	2.9128		31	2.3891	3.0516	2.9843		31	1.8708	2.2654	2.9485
32	2.1034	2.4078	2.7362		32	1.295	2.0501	1.0376		32	2.7588	2.5761	3.0371		32	2.3769	2.9304	2.9182		32	1.7756	2.3494	2.9202
33	2.0194	2.7561	2.7163		33	1.3055	2.0684	1.0586		33	2.871	2.6499	2.905		33	2.3463	2.903	3.0657		33	1.8242	2.2906	3.0397
34	2.0147	2.8561	2.5325		34	1.011	2.0605	1.2428		34	2.4945	2.5484	2.9746		34	2.5042	2.9045	3.0301		34	1.8067	2.2433	2.9587
35	2.3047	2.8547	2.5857		35	1.2083	1.5113	1.277		35	2.5446	2.4601	2.9181		35	2.3643	2.9973	2.9815		35	1.8319	2.2905	3.0819
36	2.7634	2.5779	2.8464		36	1.016	1.5492	1.4005		36	2.5963	2.6281	2.8953		36	2.4866	2.9517	2.9567		36	1.7626	2.315	2.8922
37	2.9398	2.6927	2.8775		37	0.9991	1.8648	1.2938		37	2.3888	2.6705	2.9629		37	2.6154	2.9299	3.1335		37	1.8838	2.2445	2.9296
38	2.6747	2.6893	2.8826		38	1.0374	1.5586	1.3791		38	2.6346	2.621	2.9897		38	2.587	2.9999	3.0076		38	1.5786	2.2106	3.0158
39	2.2303	2.6945	2.7932		39	1.0949	1.4865	1.3149		39	2.8431	2.7122	2.7945		39	2.6596	2.8517	2.9994		39	1.6471	2.2524	3.0796
40	2.5526	2.7762	2.5893		40	1.1697	1.7777	1.4506		40	2.7295	3.0352	2.6203		40	2.9072	2.9751	3.1503		40	1.6956	2.1237	3.0395
41	2.4088	2.6011	2.497		41	1.1972	1.4332	1.4041		41	2.6049	2.7962	2.6813		41	2.7134	2.9523	2.9057		41	1.807	2.2049	2.9959
42	2.2781	2.5422	2.5733		42	1.223	1.9702	1.5839		42	2.4562	2.7279	2.7286		42	2.7753	2.7168	3.0757		42	1.9265	2.3166	3.0195
43	2.3513	2.5399	2.7702		43	1.3692	1.7112	1.5614		43	2.4464	2.6847	2.7864		43	2.6584	2.7778	2.8556		43	1.8776	2.3016	3.0457
44	2.3305	2.5749	2.5205		44	1.3996	1.7963	1.597		44	2.4343	2.6939	2.7293		44	2.6524	2.755	2.9298		44	1.7775	2.2747	2.9043
45	2.1288	2.4192	2.4428		45	1.5023	1.9406	1.4895		45	2.4971	2.8737	2.6458		45	2.6878	2.7169	3.0005		45	1.7431	2.1329	3.0516
46	2.4035	2.3949	2.5248		46	1.625	1.8629	1.4248		46	2.6165	2.6748	2.6572		46	2.6132	2.7986	2.8364		46	1.7734	2.0945	2.9434
47	2.422	2.5713	2.4947		47	1.546	1.9115	1.5471		47	2.5793	2.8299	2.7045		47	2.5309	2.8888	2.9595		47	1.8093	2.1043	3.0001
48	2.7397	2.6073	2.7845		48	1.6735	1.893	1.5901		48	2.4968	2.671	2.7469		48	2.3954	2.8246	3.0273		48	1.7779	2.2585	2.8939
49	2.3203	2.4329	2.9542		49	1.4551	1.4571	1.5968		49	2.5768	2.6629	2.6757		49	2.3474	2.9164	2.8769		49	1.8215	2.1589	3.0071
50	2.37	2.4931	3.0237		50	1.1484	1.6951	1.5395		50	2.3617	2.8447	2.7355		50	2.247	2.8547	2.9349		50	1.9057	2.1757	2.9555
51	2.2512	2.7385	2.8997		51	1.4897	1.7899	1.7283		51	2.5072	2.7993	2.6918		51	2.2177	2.8885	2.9688		51	1.8973	2.1868	2.9808
52	2.3368	2.4555	2.7381		52	1.3244	1.8292	1.6299		52	2.4193	2.967	2.6923		52	2.3634	2.9807	2.8616		52	1.953	2.1139	3.0112
53	2.5665	2.5033	2.8711		53	1.3828	1.762	1.6402		53	2.4742	2.828	2.6193		53	2.4152	2.9502	2.8577		53	1.7473	2.1146	3.0642
54	2.4475	2.5432	2.7373		54	1.4645	1.8106	1.517		54	2.6139	2.8569	2.4879		54	2.5968	2.8304	2.8445		54	1.8232	2.1467	3.1217
55	2.6874	2.4033	2.6994		55	1.9488	1.4214	1.523		55	2.673	2.7981	2.5179		55	2.7353	2.8511	2.8354		55	1.8748	2.1352	3.0022
56	2.7587	2.39	3.0906		56	1.7254	1.4746	1.6808		56	2.6171	2.8428	2.623		56	2.4072	2.8341	2.8963		56	1.5676	2.218	3.0676
57	2.8466	2.3898	2.8129		57	2.2106	1.6326	1.9175		57	2.6594	2.7844	2.7858		57	2.6267	2.809	2.9579		57	1.6942	2.1651	2.9285
58	2.5777	2.4082	2.7039		58	1.8616	1.8118	1.99		58	2.5742	2.7143	2.6111		58	2.6196	2.7806	2.9991		58	1.7318	2.1324	2.8599
59	2.4531	2.5018	2.5778		59	1.8446	1.9772	2.074		59	2.523	2.844	2.7056		59	2.6661	2.7784	2.8312		59	1.778	2.2383	2.9711
60	2.7202	2.5053	3.0008		60	1.9659	2.4191	1.9343		60	2.5402	2.9091	2.6716		60	2.6572	2.8061	2.979		60	1.8061	2.2356	2.8999
61	2.7382	2.68	2.5533		61	1.8845	2.0205	1.7696		61	2.6853	2.8858	2.6523		61	2.5678	2.9151	2.9237		61	1.8286	2.1827	2.9372
62	2.8075	2.4965	2.6881		62	2.0983	1.9259	1.6603		62	2.7092	2.8876	2.6908		62	2.6299	2.8584	3.0492		62	1.8864	2.3288	2.99
63	2.7693	2.4762	2.4737		63	2.1444	2.2015	1.5913		63	2.6055	2.798	2.7014		63	2.6731	3.0355	3.1267		63	1.9237	2.3163	2.988
64	2.6559	2.3655	2.6792		64	2.2439	1.9735	1.5448		64	2.6065	2.8588	2.9299		64	2.628	3.0249	2.9229		64	1.9448	2.3612	3.0082
65	2.6017	2.6749	2.7117		65	2.3464	1.4061	1.4622		65	2.6502	2.817	2.8419		65	2.5218	2.937	2.7956		65	1.8916	2.3147	2.9502
66	2.6555	2.3395	2.5923		66	2.2317	1.5307	1.5836		66	2.8121	2.8096	2.9521		66	2.5892	3.0684	3.0164		66	1.9051	2.3849	2.8913
67	2.9377	2.691	2.6522		67	2.2286	1.5714	1.696		67	2.8895	2.715	2.9478		67	2.5168	3.0349	2.8165		67	1.9001	2.2679	2.9947
68	2.924	2.7065	2.466		68	2.1387	2.0357	1.7844		68	2.837	2.8308	2.8139		68	2.4945	3.0128	3.0023		68	1.8281	2.2188	3.065
69	2.6881	2.628	2.6123		69	2.1969	2.1055	2.7057		69	2.9347	2.807	2.9621		69	2.5034	2.9911	2.823		69	1.9596	2.2337	2.929
70	2.6319	2.265	2.5412		70	2.0546	2.2099	1.878		70	2.8668	2.6444	2.8243		70	2.4837	2.8671	3.0026		70	1.9377	2.2531	2.8428
71	2.4754	2.4951	2.4041		71	2.1016	1.8766	1.786		71	2.8387	2.7285	2.8108		71	2.5688	2.9226	2.8994		71	1.7738	2.4237	2.98
72	2.3987	2.7916	2.5084		72	2.0767	2.047	1.9558		72	2.781	2.7897	3.0997		72	2.541	2.9675	2.9885		72	1.7502	2.1954	2.9171
73	2.6993	2.4462	2.6209		73	2.0017	2.4318	1.6478		73	2.8313	2.9437	2.9265		73	2.5507	3.033	2.961		73	1.6677	2.1834	2.9627
74	2.3478	2.6159	2.5287		74	2.0957	2.1259	2.268		74	2.8172	2.8545	3.1522		74	2.4846	2.9839	3.2542		74	1.8895	2.1825	2.9286
75	2.4706	2.6687	2.6107		75	2.1654	1.9659	2.1457		75	2.8234	2.8968	3.0534		75	2.5228	3.1368	3.0535		75	1.9243	2.3489	2.927
76	2.4639	2.5139	2.5644		76	2.2683	2.4006	2.1152		76	2.7987	2.8645	3.0886		76	2.5786	2.8551	3.1367		76	1.722	2.2628	2.9706
77	2.186	2.8047	2.7288		77	2.3705	1.9777	2.1507		77	2.6764	2.8398	3.303		77	2.398	3.0559	2.9644		77	1.6856	2.3537	3.0488
78	2.6891	2.7495	2.403		78	2.181	2.1667	2.2388		78	2.7205	2.8338	3.0772		78	2.6494	2.9069	3.0818		78	1.8174	2.2574	2.9153
79	2.3453	2.9123	2.6599		79	2.173	1.9463	2.0689		79	2.7093	2.7593	2.9553		79	2.2888	3.0141	2.8652		79	1.9334	2.1677	2.9954
80	2.6588	2.8326	2.6231		80	2.3625	1.9836	2.3165		80	2.7715	2.7804	2.9331		80	2.5407	3.0444	3.213		80	1.825	2.2278	2.9255
81	2.4932	2.6972	2.4812		81	2.4584	1.8924	1.8598		81	2.6277	2.8321	2.9377		81	2.5323	2.979	3.157		81	1.8478	2.1981	3.0111
82	2.5302	2.601	2.4023		82	2.2991	1.9848	2.0419		82	2.6732	2.8122	3.0435		82	2.724	2.9864	2.9529		82	1.9361	2.1952	3.0372
83	2.6252	2.7181	2.3813		83	2.3518	2.3928	2.0049		83	2.7209	2.8853	2.9637		83	2.458	3.0473	2.8466		83	1.8601	2.1823	2.984
84	2.5518	2.5925	2.3084		84	2.2219	2.2706	2.4091		84	2.7502	2.8988	3.0883		84	2.3478	2.8973	3.0671		84	1.9151	2.235	2.9891
85	2.3284	2.4292	2.2694		85	2.2952	2.1239	1.7835		85	2.6971	2.8081	2.8972		85	2.3069	3.0299	3.0161		85	1.9355	2.2316	3.0766
86	2.8178	2.5275	2.3385		86	1.9764	2.3036	1.5951		86	2.627	2.8866	3.0654		86	2.2223	3.0586	2.9188		86	1.8914	2.2349	3.0384
87	2.6897	2.7967	2.2312		87	1.7636	2.1157	1.5849		87	2.7851	2.9473	3.1681		87	2.3137	3.0172	2.9482		87	2.0507	2.2986	3.0936
88	2.2443	2.7694	2.4015		88	2.2651	2.1104	1.7212		88	2.8042	2.8917	3.3063		88	2.4548	2.8905	2.8447		88	2.0132	2.2799	2.9746
89	2.7312	3.053	2.4316		89	2.2965	1.8735	1.9029		89	2.629	2.9188	3.0153		89	2.1881	2.9821	2.7727		89	2.0116	2.2522	2.9879
90	2.5118	2.5342	2.4697		90	2.3366	2.0799	1.8367		90	2.607	2.8419	3.0328		90	2.3221	2.7853	2.8838		90	2.0321	2.2653	3.0431
91	2.5215	2.8378	2.4746		91	2.2132	2.0727	2.1124		91	2.6666	2.9371	2.9061		91	2.4199	2.7368	2.9275		91	2.0134	2.3643	2.9461
92	2.4288	2.4842	2.6452		92	2.1895	2.1062	2.1308		92	2.7018	2.9637	2.9202		92	2.2292	3.0093	2.9221		92	1.8686	2.3309	2.9711
93	2.4985	2.5447	2.3946		93	1.979	1.9156	2.0992		93	2.7488	2.9719	2.6164		93	2.1717	3.1187	2.9174		93	1.9991	2.4032	2.9616
94	2.5929	2.8568	2.3952		94	2.3976	1.8863	2.0331		94	2.8372	2.8183	2.6553		94	2.4113	3.1748	3.0072		94	2.0472	2.4244	3.0603
95	2.3372	2.4491	2.2665		95	2.3035	2.0136	2.0751		95	2.5587	2.9074	2.6733		95	2.428	2.9141	2.8143		95	2.0746	2.5102	3.0045
96	2.439	2.8159	2.4024		96	2.248	1.9703	2.0496		96	2.6025	2.9808	2.7734		96	2.5488	2.8879	2.8414		96	2.0246	2.7035	2.9282
97	2.7008	2.8685	2.2774		97	1.8945	2.0592	2.0489		97	2.763	3.0075	2.8805		97	2.5097	3.03	2.9675		97	1.9965	2.8225	2.9458
98	2.6789	3.027	2.3049		98	1.5196	1.8205	1.9836		98	2.6963	3.0183	2.6685		98	2.4884	3.038	2.9221		98	2.0443	2.5634	3.0465
99	2.5485	2.7633	2.3994		99	1.3723	2.0409	2.1373		99	2.8192	2.9067	2.6688		99	2.6449	3.0059	2.8905		99	1.9928	2.5003	3.0096
100	2.575	2.9519	2.6025		100	1.3242	2.0297	2.206		100	2.7534	2.9721	2.5624		100	2.4703	3.0802	2.8617		100	2.0453	2.5392	3.0379
101	2.1573	2.925	2.2583		101	1.5197	2.1532	2.4272		101	2.7394	2.8285	2.8442		101	2.3547	2.925	3.0145		101	2.0141	2.5612	3.0168
102	2.5254	2.8947	2.4014		102	1.4812	2.0025	2.4906		102	2.8582	2.9675	2.95		102	2.5028	2.9924	2.8493		102	1.9142	2.5694	3.0055
103	2.4198	2.8895	2.3325		103	1.505	2.0011	2.2878		103	2.7887	2.8853	2.672		103	2.4344	2.9135	3.1247		103	2.041	2.6209	3.0772
104	2.3903	3.0341	2.5109		104	1.5004	2.1899	2.1344		104	2.769	2.7076	2.9523		104	2.437	3.1075	2.9258		104	1.9118	2.4579	3.0554
105	2.4276	3.0003	2.4278		105	1.461	2.2357	2.5798		105	2.7665	2.7032	3.2071		105	2.3186	3.0789	2.9048		105	2.1075	2.5361	3.0669
106	2.6664	3.1546	2.3959		106	1.4131	1.635	2.146		106	2.9141	2.8052	3.0787		106	2.4432	2.8811	3.0187		106	1.9697	2.6525	2.94
107	2.7108	2.75	2.4111		107	1.2637	2.1411	2.286		107	2.8384	2.8057	2.8317		107	2.4545	2.9291	2.9365		107	2.0059	2.6139	3.0286
108	2.6257	2.7032	2.5729		108	1.3287	1.9474	2.5279		108	2.8414	2.8705	2.6275		108	2.2966	2.9511	3.0153		108	1.9689	2.8179	2.9961
109	2.6547	2.6351	2.6567		109	1.3689	2.0493	2.3933		109	2.7473	2.9002	2.6902		109	2.4884	2.8589	3.1391		109	1.9403	2.7747	3.0013
110	2.6814	2.5126	2.3688		110	1.275	1.8703	2.5621		110	2.7166	2.9695	2.5769		110	2.6374	3.0532	2.7705		110	1.9484	2.7724	3.151
111	2.7317	2.7938	2.8321		111	1.4475	2.0291	1.8827		111	2.7474	2.888	2.6108		111	2.6656	2.953	2.9102		111	1.9572	2.6107	3.0468
112	2.8444	2.5785	2.7068		112	1.2888	2.0777	2.0425		112	2.6571	2.9176	2.6945		112	2.6768	2.9675	3.0013		112	2.001	2.8258	2.9854
113	2.7235	2.5297	2.9041		113	1.2937	1.8521	1.8444		113	2.5997	2.9433	2.7518		113	2.8721	2.9548	2.9283		113	2.0714	2.5619	2.9625
114	2.5848	2.8124	2.9354		114	1.3216	1.9831	1.7961		114	2.6677	2.9394	2.8764		114	2.7588	2.8827	2.9368		114	2.0587	2.8271	3.0489
115	2.5974	2.5967	2.7678		115	1.316	1.8676	1.8802		115	2.6756	2.8926	2.8053		115	2.6973	2.9193	2.869		115	2.0522	2.8169	2.9457
116	2.5769	2.2305	2.8118		116	1.5077	2.0161	2.0092		116	2.7576	2.8388	2.8734		116	2.7929	2.8839	2.8827		116	2.0584	2.4422	2.9932
117	2.4963	2.54	2.9708		117	1.4462	1.9321	2.036		117	2.7742	2.9234	2.6616		117	2.629	2.9984	2.9154		117	2.0237	2.8111	2.8914
118	2.4916	2.4674	2.8065		118	1.2857	2.0296	1.5428		118	2.7031	2.9272	2.7589		118	2.5752	2.9909	2.8399		118	2.0582	2.5367	2.9868
119	2.6294	2.6485	2.5425		119	1.4698	1.9669	1.7743		119	2.7342	2.9535	2.7668		119	2.6591	2.8989	2.8667		119	1.9891	2.6693	3.0423
120	2.8296	2.6642	2.5852		120	1.3286	1.8935	2.1139		120	2.7384	2.8501	2.4745		120	2.4535	2.9318	2.9453		120	2.0056	2.5894	2.942
121	2.6399	2.5484	2.3934		121	1.5659	2.1285	2.1322		121	2.6568	2.9365	2.7567		121	2.5458	3.0837	3.0252		121	2.0261	2.5223	2.998
122	2.7288	2.562	2.5213		122	1.2122	2.0487	2.2394		122	2.6427	2.8553	2.6606		122	2.4821	3.0106	2.9689		122	2.0459	2.4648	2.9162
123	2.5784	2.5809	2.9074		123	1.2736	1.904	2.1617		123	2.693	2.912	2.5853		123	2.547	3.0861	2.9038		123	2.0397	2.4109	2.9964
124	2.5777	2.5032	2.9266		124	1.2145	1.971	2.1119		124	2.4053	2.909	2.8367		124	2.4453	2.9445	2.9632		124	1.9225	2.4422	2.9416
125	2.2894	2.2905	2.955		125	1.2296	1.8877	1.816		125	2.6268	2.7866	2.4182		125	2.6046	2.9857	2.7914		125	2.1638	2.4226	2.8773
126	2.5421	2.3084	2.5594		126	1.464	2.1197	2.0421		126	2.6094	2.7951	2.3305		126	2.5363	2.8858	2.9825		126	2.0906	2.4332	2.8978
127	2.3615	2.4162	2.7874		127	1.4348	2.0313	1.9881		127	2.4657	2.835	2.3759		127	2.7275	3.0713	3.0018		127	2.0326	2.6995	2.848
128	2.5676	2.3244	2.5598		128	1.6545	1.6959	1.6		128	2.2967	2.8389	2.5745		128	2.6044	2.9508	3.1469		128	1.9904	2.689	2.7582
129	2.338	2.4346	2.4896		129	1.5329	1.9539	2.0165		129	2.4791	2.8588	2.6189		129	2.4018	3.0297	3.0136		129	1.9944	2.6677	2.761
130	2.1524	2.5131	2.3672		130	1.497	1.6296	1.841		130	2.5552	2.8866	2.6384		130	2.6458	2.9082	2.9588		130	1.9728	2.67	2.8166
131	2.3985	2.5342	2.2089		131	1.4711	1.6737	1.8048		131	2.4619	2.9211	2.4813		131	2.8183	3.0163	2.9645		131	2.0811	2.6732	2.9487
132	2.5437	2.5786	2.2842		132	1.6502	2.0755	1.1773		132	2.4552	2.8306	2.4271		132	2.5607	3.0162	2.9238		132	2.0545	2.6289	3.047
133	2.5257	2.6938	2.4829		133	1.3467	2.1539	1.7193		133	2.7959	2.8307	2.6442		133	2.5477	2.8477	2.8961		133	2.0484	2.7511	2.8679
134	2.2935	2.3904	2.9486		134	1.4885	1.9321	2.3554		134	2.5819	2.8574	2.4662		134	2.4461	2.9399	2.8223		134	2.0575	2.9151	2.917
135	2.3723	2.4438	2.9627		135	1.5719	1.9087	2.1706		135	2.8001	2.8614	2.6032		135	2.4897	3.1321	2.8138		135	2.0655	2.8217	2.8523
136	2.3367	2.6516	2.8746		136	1.5914	1.8166	2.3838		136	2.692	2.8647	2.7525		136	2.5961	3.2598	2.894		136	1.9523	2.6606	2.9792
137	2.0679	2.7022	2.934		137	1.4611	2.046	2.4764		137	2.749	2.8875	2.5623		137	2.6353	3.2264	2.9247		137	1.9624	2.7627	2.9654
138	2.486	2.8258	2.8014		138	1.6912	2.1601	2.3004		138	2.7476	2.8201	2.6666		138	2.7585	3.3138	2.9023		138	1.9124	2.7551	2.9716
139	2.3357	2.7634	2.8901		139	1.4558	2.174	2.3461		139	2.669	2.8294	2.6156		139	2.7589	3.1383	2.8626		139	1.8418	2.5805	2.9289
140	2.3195	2.7485	2.8899		140	1.5053	2.2021	1.4846		140	2.6985	2.7618	2.6258		140	2.7724	3.157	2.8418		140	1.7716	2.4291	2.8755
141	2.281	2.6811	2.8678		141	1.3862	2.1179	1.7754		141	2.7159	2.7868	2.5781		141	2.8547	3.0556	2.8246		141	1.8008	2.5906	2.9786
142	2.3163	2.9138	2.8783		142	1.5003	2.3112	1.6153		142	2.7407	2.9433	2.6581		142	2.8805	3.0962	2.8094		142	2.0373	2.689	2.9892
143	2.6268	2.8204	2.9349		143	1.5759	2.2426	1.6974		143	2.6803	2.8365	2.6019		143	2.6502	2.8417	2.8842		143	1.93	2.4301	2.8373
144	2.4405	2.6792	2.9155		144	1.2425	2.2843	2.5029		144	2.7338	2.8526	2.5537		144	2.6826	3.1981	3.0093		144	1.8494	2.3769	2.8479
145	2.2752	2.5161	2.9493		145	1.1897	2.301	2.5271		145	2.9129	2.8354	2.6313		145	2.7062	3.0892	3.0539		145	1.7736	2.5029	2.9519
146	2.1983	2.4901	3.0243		146	1.2299	2.3504	2.3927		146	2.871	2.8298	2.5378		146	2.5221	2.8651	2.9566		146	1.8233	2.6103	2.9955
147	2.2833	2.5166	2.9177		147	1.4087	2.1902	2.4252		147	2.9988	2.8806	2.6628		147	2.6106	2.7175	2.9808		147	1.7383	2.5668	3.0737
148	2.1954	2.5329	2.7338		148	1.4119	2.0769	2.5493		148	2.8106	2.8003	2.6402		148	2.6862	2.8788	2.7986		148	1.8386	2.5354	2.9288
149	2.3949	2.5688	2.8421		149	1.6162	1.7032	2.1014		149	2.6935	2.906	2.5251		149	2.65	2.7256	2.7909		149	1.8136	2.3434	2.9463
150	2.3345	2.3947	2.9094		150	1.6774	1.6488	2.0311		150	2.822	2.8699	2.4898		150	2.704	2.8242	2.9839		150	1.8089	2.4723	2.9543
151	2.4984	2.4444	2.9657		151	1.93	1.8948	2.1944		151	2.7118	3.0804	2.6882		151	2.5251	2.7007	2.9992		151	1.8497	2.397	2.7738
152	2.2424	2.4583	2.8533		152	1.9863	1.7316	2.2975		152	2.8333	3.0729	2.7581		152	2.6733	2.758	2.8209		152	1.8972	2.4004	2.9029
153	2.4222	2.5804	2.2548		153	2.1049	1.8374	2.2431		153	2.7379	2.9664	2.7783		153	2.5618	2.9501	2.8731		153	1.9663	2.4439	2.8938
154	2.5132	2.469	2.532		154	2.1488	1.7799	2.2822		154	2.8077	2.9343	2.8692		154	2.6114	2.8406	2.8776		154	1.8908	2.4271	2.8399
155	2.4855	2.587	2.6101		155	1.8827	2.0697	2.5193		155	2.8161	3.0338	2.7041		155	2.7266	2.7135	3.0201		155	1.8661	2.4919	2.8229
156	2.4109	2.7397	2.4643		156	2.3237	2.2491	2.3285		156	2.991	2.9607	2.7786		156	2.5716	2.8313	2.8452		156	1.8917	2.415	2.9532
157	2.4767	2.5442	2.4298		157	2.1262	2.4292	2.4753		157	2.996	2.9951	2.8842		157	2.7989	3.1506	3.0249		157	1.7774	2.6585	2.8231
158	2.567	2.5702	2.3427		158	2.4579	2.3064	2.6017		158	2.7786	2.9083	2.8726		158	2.5916	2.9604	3.0395		158	1.819	2.7444	2.8834
159	2.6493	2.6181	2.61		159	2.0815	2.2195	2.6109		159	2.7787	2.9234	2.7529		159	2.6902	3.2369	3.126		159	1.889	2.7218	2.8453
160	2.539	2.6461	2.6253		160	2.1952	2.3056	2.5412		160	2.7628	2.8712	2.774		160	2.6166	3.2813	3.0698		160	1.8047	2.7473	2.8696
161	2.6924	2.6668	2.4298		161	2.0038	2.2638	2.4608		161	2.7885	2.9048	2.7392		161	2.6613	3.0125	3.177		161	1.8009	2.5418	3.0184
162	2.2536	2.6643	2.7412		162	2.4717	2.3548	2.2793		162	2.7127	2.946	2.7626		162	2.5407	2.9696	2.9086		162	1.993	2.6775	2.839
163	2.4283	2.6212	2.7834		163	2.1906	2.2835	2.4701		163	2.6855	3.0338	2.6924		163	2.6959	3.0322	2.9009		163	1.9087	2.5684	2.9304
164	2.2235	2.7717	3.0177		164	1.9778	2.288	2.4171		164	2.8234	3.0222	2.8481		164	2.671	2.8328	2.8976		164	1.8399	2.7358	3.0272
165	2.4035	2.6042	2.8833		165	2.4004	2.2788	2.2688		165	2.7245	2.9791	2.6783		165	2.6551	2.7703	2.809		165	2.0405	2.6254	3.0268
166	2.4017	2.7241	2.4189		166	1.8103	2.2467	2.5659		166	2.6457	2.8111	2.8458		166	2.7714	2.8512	2.9436		166	1.8625	2.7286	2.9252
167	2.6743	2.8906	2.7841		167	1.9054	2.1465	2.6774		167	2.914	3.0347	2.8256		167	2.6247	2.8554	2.9295		167	1.9604	2.6022	2.9449
168	2.7229	2.5415	2.8313		168	2.2045	2.3774	2.5924		168	2.9956	2.9815	2.7704		168	2.6706	2.7869	2.844		168	1.8884	2.6554	2.8968
169	2.5072	2.8377	2.7405		169	1.9265	2.4134	2.7135		169	2.7908	3.0394	2.7002		169	2.6031	2.9715	2.9813		169	1.9343	2.6381	2.8095
170	2.3719	3.0817	2.8407		170	2.3653	2.4567	2.7847		170	2.7329	2.9549	2.6345		170	2.4542	3.1656	3.0632		170	1.9051	2.6385	2.9427
171	2.1178	2.5236	2.5182		171	2.3684	2.1033	2.5258		171	2.5171	3.0802	2.7469		171	2.6957	2.8963	3.2051		171	1.9474	2.6141	2.8562
172	2.2389	2.4401	2.901		172	2.2621	2.1448	2.7051		172	2.9194	2.9282	2.7541		172	2.8184	3.2192	2.9972		172	1.8802	2.5926	2.881
173	2.4185	2.7713	2.5264		173	2.0338	2.1012	2.6976		173	2.8091	3.0143	2.8944		173	2.8733	3.2016	3.0446		173	1.9044	2.6677	2.9241
174	2.1175	2.7055	2.5198		174	1.958	2.1304	2.6192		174	2.6076	3.0074	2.7723		174	2.8516	3.1955	3.06		174	1.9104	2.7019	2.8814
175	2.3059	2.7883	2.7115		175	2.0434	2.3239	2.6397		175	2.4319	3.1124	2.7473		175	2.7193	3.1551	3.2027		175	1.8727	2.7866	2.9874
176	2.353	2.7484	2.5024		176	1.3792	2.3156	2.6884		176	2.6749	3.0591	2.6409		176	2.7046	3.2894	3.3055		176	1.9842	2.7009	2.9759
177	2.2931	2.6903	2.4375		177	1.602	2.4755	2.6721		177	2.8384	3.0617	2.6959		177	2.7899	3.0881	3.1369		177	1.9629	2.6605	2.9445
178	2.2049	2.6177	2.3663		178	1.7075	2.1504	2.6718		178	2.5762	3.0967	2.6857		178	2.6968	3.2996	3.1737		178	2.0088	2.3019	3.0172
179	2.3304	2.6969	2.5474		179	1.3629	2.1458	2.6724		179	2.6109	2.9913	2.8424		179	2.7696	3.2159	3.1428		179	1.8536	2.4907	2.9782
180	2.251	2.9683	2.5243		180	2.3507	2.4202	2.6575		180	2.6764	2.9645	2.7776		180	2.8375	3.1369	3.1057		180	1.797	2.3621	2.9635
181	2.4108	2.5647	2.8141		181	2.2941	2.35	2.6747		181	2.796	2.9892	2.8048		181	2.8385	2.8966	3.0638		181	1.8898	2.4384	2.9068
182	2.2154	2.718	2.5732		182	2.021	2.5116	2.5845		182	2.707	2.9107	2.6328		182	2.7233	2.8157	3.1186		182	1.8691	2.3466	2.8744
183	2.2601	2.5856	2.7298		183	2.1549	2.4581	2.5966		183	2.628	2.8646	2.4871		183	2.8475	3.0642	3.1583		183	1.9017	2.5578	2.8562
184	2.338	2.6673	2.6075		184	2.029	2.4775	2.6931		184	2.7443	3.1159	2.5896		184	2.8309	2.9958	3.0765		184	1.8186	2.4286	2.8985
185	2.1948	2.6784	2.6594		185	2.4726	2.4259	2.354		185	2.7003	2.9659	2.7112		185	2.7649	2.9434	3.2152		185	1.8436	2.6517	2.9286
186	2.2625	2.9274	2.4474		186	2.6706	2.4302	2.5733		186	2.7625	3.104	2.612		186	2.8686	2.9234	3.083		186	1.9041	2.7756	2.8944
187	2.1574	2.6071	2.4942		187	2.816	2.3868	2.3577		187	2.8785	3.1827	2.5359		187	2.6498	3.01	3.1333		187	2.0254	2.727	2.8352
188	2.217	2.3505	2.6536		188	2.4768	2.3539	1.8523		188	2.6731	3.1066	2.6081		188	2.673	2.9571	3.1507		188	2.0432	2.6828	2.8958
189	1.9648	2.6751	3.0124		189	2.4734	2.2594	2.2732		189	2.8132	3.1181	2.6149		189	2.6117	2.7838	3.2471		189	1.9661	2.7769	3.0209
190	2.0518	2.7071	2.8928		190	2.4971	2.2794	2.1134		190	2.7519	3.0176	2.6764		190	2.5406	2.9788	3.0841		190	1.8916	2.827	2.7949
191	1.9191	2.5679	2.8604		191	2.5615	2.1943	2.1171		191	2.6196	2.9965	2.7028		191	2.7328	2.991	3.1054		191	1.9117	2.8061	2.9292
192	2.2003	2.6204	2.9173		192	2.3026	2.2395	1.7942		192	2.6696	3.0405	2.6804		192	2.6482	2.8248	3.0353		192	2.002	2.7082	2.999
193	2.2493	2.5853	2.8173		193	2.1661	2.3892	1.9491		193	2.8849	3.0505	2.6086		193	2.7323	2.9085	3.1499		193	2.0457	2.7245	2.9527
194	2.635	2.7277	2.7558		194	2.1093	2.4222	1.9466		194	2.7531	3.0135	2.712		194	2.7186	2.9849	3.219		194	2.1205	2.7803	2.9971
195	2.2532	2.8184	2.8616		195	2.1709	2.4152	1.8473		195	2.8694	3.0306	2.6618		195	2.6836	2.878	3.1592		195	2.2169	2.6173	2.8648
196	2.2404	2.6	2.8023		196	2.0155	2.3993	1.8144		196	2.7586	3.0073	2.6194		196	2.7425	2.9446	3.1844		196	2.1055	2.6752	2.991
197	2.2888	2.4771	2.7369		197	1.989	2.2695	1.7764		197	2.7287	3.1215	2.7181		197	2.5949	3.0779	3.1486		197	2.0567	2.7559	3.0115
198	2.369	2.3909	2.6501		198	2.3993	2.2802	1.7846		198	2.7221	2.974	2.631		198	2.657	3.0588	3.1346		198	2.1923	2.6547	3.1206
199	2.3462	2.5294	2.8575		199	2.502	2.094	1.4264		199	2.7997	3.0304	2.6676		199	2.706	2.9215	3.1172		199	2.0929	2.7383	3.1353
200	2.3728	2.747	2.7548		200	2.531	2.2655	1.6483		200	2.7515	2.9513	2.6299		200	2.7222	2.9795	2.9976		200	2.1252	2.6773	3.008
201	2.5274	2.8447	2.9859		201	2.3312	2.2278	1.516		201	2.746	2.9308	2.735		201	2.7868	2.9931	2.8839		201	2.1047	2.6819	3.018
202	2.807	2.868	2.9582		202	2.4726	2.4272	1.5897		202	2.7648	2.8597	2.7844		202	2.9043	3.0594	3.037		202	2.1136	2.595	2.9292
203	2.5989	2.6519	2.904		203	1.9269	2.2318	1.6559		203	2.9503	3.0063	2.5293		203	2.8089	3.0437	2.7612		203	2.0307	2.6416	2.9
204	2.6086	2.8829	2.875		204	2.1125	2.3011	1.6311		204	2.9668	3.0198	2.6515		204	2.7796	2.8882	2.7196		204	1.9666	2.782	2.851
205	2.6998	2.9411	2.8375		205	1.8821	2.3504	1.691		205	3.0048	2.881	2.5532		205	2.851	3.218	2.7608		205	1.9207	2.5118	2.9809
206	2.7489	2.8982	2.5909		206	1.6412	2.2266	1.4901		206	2.7477	2.8997	2.8191		206	2.7879	3.089	3.0086		206	2.3324	2.7334	3.0486
207	2.5278	2.9932	2.6397		207	2.0473	2.2191	1.1606		207	2.6261	2.8935	2.5798		207	2.8258	3.0247	2.9686		207	1.9638	2.7152	2.9335
208	2.4954	2.988	2.9637		208	1.7001	2.1509	1.1674		208	2.6265	2.905	2.7193		208	2.7569	2.9606	2.9731		208	1.9036	2.4907	3.0807
209	2.6837	2.9035	2.6717		209	2.0283	2.1329	1.1187		209	2.5839	2.8256	2.5793		209	2.9478	2.9972	3.0029		209	2.3539	2.7237	3.0009
210	2.782	3.0002	2.7662		210	1.8643	2.225	0.959		210	2.4541	2.8481	2.5935		210	2.7771	3.1387	3.1882		210	1.9795	2.5438	2.9245
211	2.8309	2.9596	2.5317		211	1.8323	2.1932	1.4097		211	2.3051	2.9217	2.4772		211	2.7438	3.0447	3.3075		211	2.0271	2.4433	3.094
212	2.4669	2.9469	2.6572		212	1.8105	2.1641	1.4681		212	2.2485	2.8175	2.5041		212	2.8475	2.9301	3.0054		212	1.9414	2.413	3.1173
213	2.6639	2.8882	2.5322		213	1.9138	2.0151	1.1155		213	2.4443	2.8039	2.3345		213	2.8431	3.0753	2.9531		213	2.0235	2.2813	2.9503
214	2.6695	2.8303	2.6794		214	1.9115	2.014	0.998		214	2.4046	2.9241	2.5519		214	2.8627	2.8761	3.3301		214	1.922	2.359	3.0028
215	2.672	2.9207	2.7237		215	2.4025	2.1774	0.918		215	2.4582	2.8773	2.6347		215	2.6138	2.9241	3.1705		215	1.8751	2.3461	2.9036
216	2.7681	2.8542	2.8154		216	2.557	2.096	0.9083		216	2.487	2.8149	2.4454		216	2.7476	2.963	2.9438		216	1.8964	2.3767	2.8923
217	2.7874	2.7366	2.3116		217	2.4022	2.0195	1.1331		217	2.4768	2.8273	2.6226		217	2.6552	3.0066	2.937		217	1.9408	2.358	2.972
218	2.6516	2.7446	2.4369		218	2.5496	2.1519	1.0007		218	2.5585	2.8687	2.6201		218	2.545	3.0181	2.9417		218	1.8475	2.4395	2.9164
219	2.8871	2.6349	2.4162		219	2.6197	1.8129	0.94		219	2.5536	2.9063	2.4631		219	2.8696	2.881	2.9778		219	1.786	2.4348	2.9445
220	2.7126	2.893	2.4496		220	2.5124	1.7577	1.1422		220	2.4935	2.6402	2.5935		220	2.915	3.0933	2.9013		220	2.1741	2.4328	3.0309
221	2.7008	2.9485	2.4195		221	2.4652	2.0839	1.1411		221	2.383	2.8874	2.3424		221	2.6162	2.9608	2.8687		221	2.1348	2.4218	2.9024
222	2.704	2.8983	2.3695		222	2.5225	2.1185	1.0325		222	2.5839	2.9457	2.5576		222	2.5885	2.8857	2.9464		222	2.4901	2.7453	3.0055
223	2.6276	2.8387	2.4799		223	2.4808	1.8182	1.2691		223	2.5152	2.8623	2.5673		223	2.6816	2.9506	2.7149		223	2.5398	2.6498	3.0144
224	2.4419	2.866	2.4948		224	2.5037	1.8927	1.0899		224	2.5182	2.7368	2.6302		224	2.8014	2.9548	2.8626		224	2.4519	2.7468	2.9044
225	2.4807	2.9377	2.5289		225	2.5872	1.9618	0.9937		225	2.3455	2.7493	2.5022		225	2.9863	2.9811	2.8717		225	2.5614	2.8585	2.9256
226	2.7277	2.5883	2.5448		226	2.2821	1.6192	1.0732		226	2.334	2.6938	2.6075		226	2.9768	3.014	2.8203		226	2.545	2.8535	2.9322
227	2.7735	2.3988	2.3595		227	2.3297	1.6717	1.08		227	2.3037	2.6706	2.4393		227	2.9313	2.8776	2.876		227	2.4013	2.8057	2.9858
228	2.7192	2.6669	2.3042		228	1.9094	1.7724	1.0525		228	2.4552	2.8672	2.36		228	2.8263	3.171	2.778		228	1.9354	2.8594	2.8958
229	2.7837	2.5807	2.5777		229	1.9846	1.729	1.0578		229	2.4382	2.7082	2.5768		229	3.0515	2.9673	2.803		229	2.0429	2.8446	3.0386
230	2.6834	2.555	2.5335		230	2.1281	1.8485	0.9799		230	2.3415	2.689	2.6414		230	2.9874	2.7671	2.8781		230	2.3177	2.8286	3.0094
231	2.4265	2.9649	2.7109		231	2.0146	1.9463	0.9663		231	2.4475	2.7417	2.5384		231	2.9193	2.966	2.8514		231	1.9743	2.8303	3.0344
232	1.9975	2.5559	2.8348		232	1.8415	1.7351	0.9214		232	2.4936	2.566	2.6491		232	3.0583	3.0134	2.8092		232	2.0248	2.9016	2.9381
233	2.0836	2.4682	2.7385		233	1.891	1.5195	1.1386		233	2.4681	2.6915	2.3445		233	3.0333	2.8884	2.7069		233	2.1598	2.7517	2.9845
234	2.4789	2.7161	2.8689		234	2.0227	1.7101	1.1379		234	2.4692	2.7884	2.4873		234	2.9745	3.0042	2.8214		234	2.2206	2.6993	2.8959
235	2.7743	2.322	2.6825		235	2.1127	1.7893	1.1842		235	2.5308	2.7832	2.5049		235	2.968	3.0232	2.7748		235	1.8958	2.8264	2.9992
236	2.7951	2.6385	2.8207		236	1.7571	1.5949	1.221		236	2.4486	2.7812	2.3794		236	3.0471	2.9548	2.7752		236	1.9963	2.8195	2.922
237	2.7145	2.63	2.5053		237	2.3542	1.5043	1.1991		237	2.4697	2.6697	2.264		237	2.9479	2.8757	2.8517		237	2.1362	2.9682	2.822
238	2.703	2.554	2.4739		238	2.151	1.7272	1.8458		238	2.4989	2.7015	2.4015		238	3.0673	2.994	2.9674		238	2.2537	2.8287	3.0741
239	2.1054	2.5263	2.6577		239	2.393	1.8445	1.465		239	2.4674	2.714	2.455		239	2.8892	2.9398	2.8377		239	2.0907	2.6998	3.1142
240	2.3205	2.4692	2.4753		240	2.4502	1.7323	1.3418		240	2.4521	2.8233	2.3086		240	2.9275	3.259	2.7714		240	1.9325	2.7081	3.0093
241	2.4608	2.4464	2.7464		241	2.1564	1.839	1.6808		241	2.485	2.6221	2.4594		241	3.0142	2.9599	2.9279		241	2.0154	2.7635	2.9589
242	2.4281	2.3887	2.9563		242	2.3352	2.0139	1.3107		242	2.5566	2.8256	2.4795		242	2.9617	2.8342	2.8758		242	2.0133	2.8354	2.9803
243	2.6005	2.5967	2.8501		243	2.1797	1.8767	1.3241		243	2.5185	2.8837	2.6443		243	2.9884	2.8895	3.0814		243	1.9456	2.8389	2.9934
244	2.5448	2.5976	2.8295		244	2.2436	1.5736	1.4066		244	2.4935	2.7833	2.6846		244	3.0762	2.9463	2.9432		244	2.0677	2.859	2.9927
245	2.8367	2.7554	2.587		245	2.2424	1.9673	1.4133		245	2.4575	2.8667	2.779		245	2.925	2.9405	2.874		245	2.0656	2.8336	2.9634
246	2.8144	2.6906	2.8177		246	2.3947	2.232	1.9305		246	2.4776	2.7623	2.7505		246	2.891	2.9822	2.8594		246	1.9652	2.868	2.9506
247	2.8094	2.6663	2.8343		247	2.6742	2.0692	2.0754		247	2.5601	2.7303	2.6584		247	2.9285	2.8432	2.9487		247	1.9345	2.9044	3.029
248	2.6988	2.5803	2.6488		248	2.7543	1.6618	2.0287		248	2.3172	2.7505	2.7326		248	2.8333	2.7242	3.0957		248	1.948	2.9133	2.9732
249	2.7123	2.4632	2.8336		249	2.3571	1.9626	2.3638		249	2.5306	2.7196	2.7348		249	3.0012	2.8011	3.17		249	2.1653	2.8975	2.9605
250	2.7539	2.6663	2.6336		250	2.1455	1.7798	1.6229		250	2.2533	2.7326	2.873		250	2.9844	2.949	3.2247		250	2.103	2.8586	2.8705
251	2.8135	2.6343	2.8348		251	1.8923	1.4916	1.3794		251	2.6714	2.6571	2.7953		251	2.8693	3.0052	2.9708		251	2.0544	2.7521	2.7591
252	2.7383	2.7848	2.959		252	2.0431	1.2415	1.83		252	2.587	2.5111	2.5023		252	2.9603	2.9901	3.1065		252	2.2409	2.8009	2.8697
253	2.8293	2.7628	2.9078		253	2.019	1.2219	1.516		253	2.5492	2.6344	2.5901		253	2.9815	2.8469	2.8613		253	2.0169	2.7968	2.8069
254	2.7755	2.4915	2.824		254	1.7524	1.199	1.8527		254	2.2646	2.5434	2.4739		254	2.9919	2.9886	2.9953		254	2.1453	2.9364	2.8922
255	2.7641	2.6444	2.7247		255	1.9334	1.3659	2.5604		255	2.3533	2.6008	2.6322		255	2.8688	2.8869	3.0367		255	1.9429	2.8579	2.8449
256	2.8279	2.7685	2.7413		256	1.6989	1.5808	2.3505		256	2.5111	2.7466	2.5466		256	2.8087	2.8402	2.9665		256	2.2662	2.9207	2.8795
257	2.8742	2.7111	2.4393		257	1.7441	1.3282	2.3541		257	2.3948	2.7271	2.6214		257	2.62	3.112	2.9498		257	2.4808	2.8605	2.8974
258	2.7219	2.6611	2.8976		258	1.6061	1.2755	2.2096		258	2.6289	2.6862	2.6236		258	3.0768	2.8848	2.9881		258	2.3616	2.8937	2.8034
259	2.7584	2.4596	2.8958		259	1.8899	1.9739	2.4754		259	2.5434	2.6301	2.6766		259	2.9506	3.1088	3.0831		259	2.4418	2.9952	2.7734
260	2.8312	2.59	2.6367		260	1.5905	1.8017	2.5443		260	2.4158	2.5367	2.4972		260	2.9427	3.0581	2.8753		260	2.5244	2.8485	2.9396
261	2.9131	2.6422	2.8947		261	1.3182	1.5129	2.5997		261	2.3949	2.5792	2.5355		261	3.1213	3.0056	2.9226		261	2.3708	2.9318	2.9105
262	2.9092	2.6333	2.9449		262	1.4292	1.8723	2.5423		262	2.3748	2.6724	2.358		262	3.0786	2.9145	2.8632		262	2.4265	2.8619	2.9477
263	2.7688	2.6505	3.0345		263	1.2692	1.5753	2.6541		263	2.1592	2.705	2.4832		263	2.9721	2.899	2.9988		263	2.4707	2.8313	2.9962
264	2.8804	2.506	2.9455		264	1.4171	1.8918	2.3527		264	2.4185	2.5833	2.4425		264	2.9816	2.9316	2.8803		264	2.5057	2.8353	2.9062
265	2.8665	2.8876	2.8283		265	1.522	1.8798	2.4457		265	2.3325	2.7556	2.4178		265	2.8262	2.9469	2.9767		265	2.4336	2.7712	2.9063
266	2.8925	2.6645	3.0399		266	1.3027	2.04	2.4228		266	2.2857	2.5425	2.5208		266	2.8074	2.9812	3.1374		266	2.4859	2.7219	2.952
267	2.7885	2.7072	2.9572		267	1.7826	2.1427	2.5549		267	2.3228	2.6736	2.4184		267	2.7914	3.06	2.9786		267	2.4274	2.705	2.8559
268	2.5558	2.8076	3.0977		268	1.6144	1.9906	2.5071		268	2.1423	2.5969	2.3275		268	2.7189	2.8833	2.8902		268	2.3963	2.808	2.9572
269	2.74	2.8605	2.8541		269	1.5028	1.933	2.3846		269	2.2132	2.6524	2.3446		269	2.7472	2.9464	2.9616		269	2.4419	2.8915	2.8868
270	2.7649	2.9127	2.9316		270	1.4463	1.8331	2.4485		270	2.4037	2.7038	2.3646		270	2.9133	2.8638	3.0124		270	2.2899	2.8484	2.8286
271	2.7655	2.8658	3.1628		271	1.4187	1.5946	2.1771		271	2.4382	2.6242	2.329		271	2.8395	2.7768	2.8814		271	2.3651	2.7675	2.9087
272	2.5594	2.9202	3.0469		272	1.5138	1.7167	2.0932		272	2.2971	2.8573	2.4365		272	2.8052	2.7476	2.9491		272	2.2999	2.8508	2.7716
273	2.8417	2.7714	2.951		273	1.3679	1.9078	2.4176		273	2.3356	2.8416	2.4748		273	2.9019	2.9139	2.9612		273	2.3657	2.8175	2.7765
274	2.609	2.9629	2.8667		274	1.3321	1.7577	2.5072		274	2.3229	2.797	2.3277		274	2.9132	3.0093	3.03		274	2.3435	2.8172	2.8258
275	2.7959	2.5903	2.8921		275	1.3955	1.9453	2.5069		275	2.2442	2.8986	2.3845		275	2.7326	2.8349	2.9158		275	2.3533	2.7887	2.8352
276	2.7294	2.92	2.9981		276	1.6475	1.8366	2.4805		276	2.1419	2.7198	2.4592		276	2.9437	2.8748	2.9368		276	2.4912	2.6288	2.8071
277	2.6673	2.6817	2.9361		277	1.7037	1.8957	2.5685		277	2.2121	2.7954	2.4425		277	3.0619	2.9355	3.0329		277	2.327	2.7448	2.8502
278	2.6509	2.9635	2.9798		278	1.915	1.6235	2.3264		278	2.3333	2.7883	2.55		278	2.7834	2.8429	3.0008		278	2.4455	2.7681	2.9245
279	2.752	2.9023	2.86		279	1.7938	1.8273	2.1573		279	2.2647	2.7919	2.3664		279	2.9062	2.7188	2.9869		279	2.3372	2.7699	3.0747
280	2.8485	2.6513	2.9346		280	2.3832	1.2942	2.3471		280	2.2895	2.8851	2.4476		280	2.7321	2.8747	3.083		280	2.2284	2.7602	3.0053
281	2.3274	2.6688	2.7839		281	2.1613	1.7378	2.5361		281	2.3323	2.8346	2.5171		281	2.8203	2.8231	3.0952		281	2.2387	2.7282	3.1203
282	2.4122	2.6659	2.7664		282	1.7667	1.4711	2.576		282	2.2486	2.8545	2.3812		282	2.6123	2.8548	3.1177		282	2.3906	2.753	2.9317
283	2.5306	2.5177	2.8428		283	1.9429	1.8178	2.599		283	2.2695	2.7884	2.2708		283	2.6867	2.8802	3.0817		283	2.3685	2.722	3.1273
284	2.8479	2.825	2.7315		284	1.6369	2.2472	2.5239		284	2.2797	2.6839	2.54		284	2.7757	3.0397	3.0851		284	2.5921	2.7296	2.9809
285	2.7403	2.7173	2.6445		285	1.6872	1.909	2.7367		285	2.4498	2.9497	2.3798		285	2.6601	3.104	3.1125		285	2.5657	2.7773	3.0686
286	2.8288	3.1634	2.7124		286	1.6083	1.9241	2.64		286	2.4412	2.8142	2.6399		286	2.7191	3.0329	3.0597		286	2.5533	2.7074	2.9299
287	2.9282	3.0634	2.7712		287	1.7145	1.8887	2.6762		287	2.2377	2.9534	2.6688		287	2.6733	2.9875	3.1422		287	2.5314	2.7617	3.0044
288	2.6981	2.9872	2.9024		288	1.8356	1.6397	2.6445		288	2.2413	2.8606	2.5794		288	2.6815	3.145	3.1096		288	2.5533	2.8753	3.047
289	2.7407	3.024	2.8604		289	1.984	1.3347	2.6247		289	2.1866	3.048	2.5595		289	2.6437	2.9879	3.1562		289	2.4964	2.7801	3.08
290	2.8309	3.1969	2.8583		290	1.6563	1.4844	2.747		290	2.2007	3.0181	2.732		290	2.6884	2.9424	3.1374		290	2.5038	2.8043	2.9648
291	2.8322	3.1539	2.8943		291	1.7203	1.3394	2.6232		291	2.5303	2.922	2.5		291	2.8868	2.8598	3.1264		291	2.4451	2.8485	2.9131
292	2.8021	2.8604	2.7706		292	1.7204	1.42	2.7087		292	2.3102	2.9327	2.6257		292	2.8402	2.8122	2.9255		292	2.467	2.7346	3.011
293	2.7513	3.0303	2.8109		293	1.5753	1.5401	2.7074		293	2.3513	2.9439	2.5411		293	3.0312	2.8061	3.0251		293	2.4596	2.7572	2.8675
294	2.6257	2.8637	2.809		294	1.5503	1.6933	2.6095		294	2.2829	2.8082	2.5377		294	2.9649	2.7914	2.884		294	2.591	2.9504	2.9748
295	2.5691	2.6701	2.8515		295	1.4996	1.866	2.6077		295	2.3053	2.6557	2.4713		295	2.8376	2.997	3.0867		295	2.4528	2.7202	2.9199
296	2.6812	2.6218	2.8038		296	1.401	2.147	2.6831		296	2.3326	2.6555	2.3956		296	2.8405	2.8042	2.8391		296	2.4193	2.794	2.9661
297	2.7297	2.7504	2.7618		297	1.8074	1.763	2.8201		297	2.3991	2.6523	2.3349		297	2.9204	2.9213	2.8572		297	2.4909	2.7686	2.915
298	2.6309	2.4787	2.7998		298	1.5329	1.7646	2.7005		298	2.3566	2.5493	2.5046		298	2.7858	2.7945	2.9372		298	2.5386	2.7161	2.9126
299	2.7477	2.7841	2.6603		299	1.7192	1.933	2.7806		299	2.432	2.627	2.5776		299	3.0911	3.0575	2.8306		299	2.5416	2.7925	2.9419
300	2.6128	2.8243	2.7993		300	1.5435	1.8414	2.8893		300	2.2373	2.643	2.5314		300	2.9119	2.9141	2.7904		300	2.4475	2.7451	2.9896
301	2.762	2.448	2.6988		301	1.4143	1.833	2.7107		301	2.2482	2.733	2.5088		301	2.9299	2.9339	2.9494		301	2.3965	2.7846	3.0133
302	2.7744	2.7493	2.774		302	1.5205	2.0141	2.8003		302	2.1829	2.6499	2.5449		302	2.9399	2.8929	2.9635		302	2.461	2.836	2.9458
303	2.7186	2.679	2.8262		303	1.6489	2.0037	2.687		303	2.3438	2.6593	2.5113		303	2.8763	2.9892	2.9925		303	2.5165	2.7789	3.0795
304	2.7732	2.5464	2.7968		304	1.4069	1.5705	2.7827		304	2.2475	2.6064	2.5606		304	2.9025	2.7956	2.9512		304	2.5777	2.7192	3.0044
305	2.8344	2.7961	2.8325		305	1.2941	1.726	2.7154		305	2.3515	2.7073	2.6121		305	2.8946	2.814	2.9541		305	2.4731	2.8157	2.885
306	2.7382	2.4596	2.8501		306	1.4132	1.8744	2.653		306	2.2896	2.7213	2.5925		306	2.8694	2.8632	2.9778		306	2.4478	2.7481	2.8311
307	2.6349	2.6527	2.8527		307	1.4644	1.8886	2.7213		307	2.3765	2.787	2.4091		307	2.7917	2.9586	2.9509		307	2.4434	2.6802	2.8731
308	2.5618	2.6037	2.875		308	1.3453	1.6765	2.7777		308	2.2751	2.7039	2.3946		308	2.8807	2.8042	2.9146		308	2.5061	2.6964	2.8767
309	2.3143	3.0318	2.9009		309	1.5151	1.7569	2.7069		309	2.3103	2.8265	2.2284		309	2.7648	2.7761	2.9159		309	2.5101	2.6797	2.7743
310	2.1835	2.7947	2.7062		310	1.7359	1.6211	2.7153		310	2.4295	2.7432	2.3052		310	2.8317	2.8216	3.0118		310	2.4585	2.7452	2.7601
311	2.2309	2.6416	2.7863		311	1.6535	1.6298	2.528		311	2.3702	2.7884	2.3103		311	2.8051	2.8573	2.9671		311	2.3608	2.7754	2.7618
312	2.1833	2.853	2.7659		312	1.6306	1.7918	2.5742		312	2.4352	2.7838	2.3812		312	2.791	3.0738	2.8306		312	2.4198	2.6898	2.8924
313	2.041	2.8673	2.7719		313	1.5704	1.9507	2.7231		313	2.3851	2.6852	2.5862		313	2.7607	2.8903	2.9111		313	2.4507	2.7542	2.8381
314	2.1535	2.6924	2.8027		314	1.6425	1.8084	2.7869		314	2.3342	2.3628	2.6616		314	2.7979	2.9623	2.9028		314	2.5416	2.673	2.8702
315	2.0789	2.546	2.811		315	1.6073	2.2187	2.8114		315	2.4019	2.6675	2.5896		315	2.7797	2.8108	3.0506		315	2.4898	2.7048	2.8084
316	2.1713	2.5386	2.8968		316	1.5516	1.8338	2.6847		316	2.3535	2.6921	2.6491		316	2.9002	2.7725	3.1112		316	2.5701	2.6619	2.9438
317	2.2272	2.6086	2.7762		317	1.5077	2.0831	2.708		317	2.3021	2.6102	2.4745		317	3.0068	2.9498	3.1268		317	2.5066	2.7461	2.8429
318	2.2073	2.7942	2.7227		318	1.5147	1.7706	2.6966		318	2.3372	2.7761	2.4627		318	2.9151	2.9187	2.9564		318	2.5184	2.6965	2.8961
319	2.2455	2.8968	2.6271		319	1.4114	2.0612	2.688		319	2.4211	2.9521	2.6825		319	3.0244	2.7919	3.0256		319	2.5503	2.7932	2.9156
320	2.419	3.0002	2.7359		320	1.4944	2.1226	2.6394		320	2.3618	2.7699	2.6265		320	2.895	2.8407	3.0862		320	2.3394	2.6053	2.7298
321	2.2779	2.9456	2.6466		321	1.4104	1.6608	2.6358		321	2.2583	2.6605	2.5513		321	2.9251	2.8021	2.992		321	2.5479	2.6915	2.7932
322	2.3679	2.6914	2.5524		322	1.5682	1.3201	2.5996		322	2.4037	2.6445	2.6107		322	2.8415	2.8629	2.9775		322	2.5125	2.8019	2.8854
323	2.4019	2.8143	2.7157		323	1.4513	1.979	2.7339		323	2.5401	2.7437	2.5281		323	3.0001	2.9339	3.0066		323	2.4	2.6897	2.9169
324	2.3681	2.771	2.9091		324	1.5177	1.71	2.6546		324	2.5594	2.5907	2.5934		324	2.8928	2.9805	2.9105		324	2.4703	2.7053	2.9238
325	2.3673	2.6362	2.6525		325	1.6316	1.5475	2.8318		325	2.56	2.6798	2.6226		325	2.8659	2.8544	3.0186		325	2.561	2.6759	2.901
326	2.4922	2.6733	2.9567		326	1.3788	1.7528	2.8958		326	2.5049	2.6604	2.5956		326	2.9659	2.8244	3.0829		326	2.4753	2.6135	2.9644
327	2.4631	2.9301	2.8875		327	1.6357	1.769	2.9665		327	2.5639	2.6548	2.6525		327	2.8233	2.9378	2.927		327	2.5291	2.7041	2.9545
328	2.3424	2.8493	2.8403		328	1.4844	1.7561	2.9303		328	2.5296	2.7032	2.5167		328	2.8598	2.6832	3.1577		328	2.3322	2.7475	3.0014
329	2.0845	2.7562	2.7676		329	1.7034	1.6711	2.8702		329	2.6066	2.7601	2.5572		329	2.6925	2.8421	3.0472		329	2.5152	2.7274	2.9934
330	2.0915	2.6532	2.8126		330	1.6814	1.7265	2.7252		330	2.5728	2.7686	2.6448		330	2.6892	2.9911	2.9669		330	2.491	2.7532	2.8514
331	2.3394	2.6873	2.9204		331	1.4344	1.7379	2.6758		331	2.3759	2.7975	2.6207		331	2.649	2.7364	2.9374		331	2.4915	2.734	2.9137
332	2.2891	2.5166	2.7959		332	1.7248	1.6096	2.6439		332	2.4586	2.8202	2.6987		332	2.7933	2.6834	2.9094		332	2.5067	2.6525	2.9358
333	2.2663	2.5614	2.8237		333	1.8007	1.5933	2.7408		333	2.4449	2.709	2.6914		333	2.7075	2.7644	3.0059		333	2.4912	2.7689	2.8327
334	2.3273	2.5214	2.865		334	1.7099	1.6604	2.779		334	2.6031	2.6862	2.6674		334	2.7497	2.7743	3.0332		334	2.596	2.7555	2.9119
335	2.3198	2.3597	2.6753		335	1.8145	1.7274	2.6386		335	2.3274	2.7191	2.7116		335	2.6586	2.8467	2.9392		335	2.4373	2.8251	3.035
336	2.3285	2.5597	2.7472		336	1.6105	1.8021	2.8498		336	2.3001	2.8493	2.5985		336	2.7716	2.8765	2.9084		336	2.4705	2.7406	2.9681
337	2.4049	2.5906	2.9088		337	1.5465	1.6382	2.7763		337	2.5074	2.6759	2.5768		337	2.7166	2.9668	2.8512		337	2.3968	2.8099	3.0271
338	2.581	2.4083	2.7552		338	1.6385	1.5996	2.7556		338	2.4163	2.692	2.5926		338	2.655	2.8393	2.9322		338	2.467	2.724	2.9479
339	2.8997	2.4134	2.6364		339	1.579	1.7441	2.8061		339	2.4476	2.688	2.6305		339	2.7344	2.9233	2.7768		339	2.3567	2.7186	2.9415
340	2.8311	2.3317	2.9386		340	1.3493	1.8708	2.8395		340	2.5104	2.658	2.4384		340	2.9164	2.8354	2.837		340	2.3592	2.6739	2.9543
341	2.8142	2.251	2.907		341	1.3269	1.8069	2.9277		341	2.3687	2.5984	2.4422		341	2.9986	2.9434	2.9763		341	2.2661	2.722	2.9501
342	2.9445	2.3301	2.8182		342	1.3901	1.7465	2.6912		342	2.4867	2.5823	2.5755		342	2.8659	2.7855	2.7221		342	2.2537	2.7398	2.753
343	2.7011	2.297	2.7314		343	1.5667	2.1303	2.6646		343	2.6381	2.6996	2.5213		343	2.7906	2.7121	2.8659		343	2.3082	2.6939	2.8618
344	2.7132	2.5745	2.7848		344	1.4094	1.6344	2.6821		344	2.2631	2.65	2.5187		344	2.858	2.7927	2.9128		344	2.5037	2.6514	2.8648
345	2.7652	2.5755	2.8498		345	1.3048	1.8649	2.6722		345	2.4938	2.7991	2.4502		345	2.8039	2.7451	2.8909		345	2.5869	2.8183	2.8684
346	3.0442	2.5211	2.8114		346	1.3946	1.7025	2.8107		346	2.6174	2.6405	2.5894		346	2.8361	2.8264	2.8325		346	2.5334	2.7214	2.867
347	2.8641	2.6557	2.8845		347	1.2881	1.9001	2.6782		347	2.2763	2.5644	2.6696		347	2.7213	2.7503	2.7897		347	2.5764	2.5882	2.8942
348	2.8477	2.7467	2.8861		348	1.2779	1.7521	2.6561		348	2.2605	2.6651	2.6994		348	2.6897	2.8256	2.8106		348	2.5656	2.6669	2.7949
349	2.9128	2.5845	2.8561		349	1.2602	1.678	2.9512		349	2.2289	2.633	2.5666		349	2.943	2.7082	2.9046		349	2.6435	2.6871	3.0417
350	2.7966	2.4279	2.7641		350	1.4869	1.7749	2.7415		350	2.4604	2.6399	2.5603		350	2.7153	2.8782	2.7529		350	2.3783	2.6064	2.9724
351	2.7836	2.7395	2.8336		351	1.448	1.942	2.657		351	2.3822	2.5804	2.4971		351	2.7942	2.5891	2.9788		351	2.3225	2.6138	3.1171
352	2.7634	2.5504	2.8697		352	1.4658	1.9731	2.7216		352	2.4544	2.6337	2.4858		352	3.0011	2.6985	3.0788		352	2.3164	2.6561	3.0155
353	2.8504	2.4226	2.9014		353	1.403	1.9973	2.7399		353	2.4819	2.5391	2.5983		353	2.8289	2.7119	2.9782		353	2.4453	2.5269	3.0816
354	2.7948	2.3615	2.9092		354	1.393	2.0313	2.584		354	2.34	2.5747	2.6688		354	2.8528	2.9648	2.9458		354	2.3257	2.6628	2.956
355	2.7437	2.4596	2.6886		355	1.3881	2.2127	2.7358		355	2.389	2.5451	2.6732		355	3.0096	2.7583	2.945		355	2.4137	2.6236	2.9798
356	2.6749	2.6636	2.6654		356	1.4807	2.0803	2.6709		356	2.2168	2.4833	2.5691		356	2.8806	2.8307	2.9584		356	2.2943	2.6267	2.9183
357	2.4265	2.3611	2.7322		357	1.5602	1.7775	2.6736		357	2.1878	2.6438	2.5716		357	3.0432	2.8805	2.827		357	2.4075	2.634	3.0185
358	2.3256	2.591	2.7099		358	1.4137	1.7847	2.6408		358	2.2621	2.7039	2.4652		358	2.887	2.7089	2.8566		358	2.3922	2.6856	2.9018
359	2.2231	2.6465	2.7382		359	1.5651	1.9808	2.6582		359	2.4471	2.7531	2.5978		359	2.7924	2.8059	2.8164		359	2.386	2.4898	2.9361
360	2.2323	2.366	2.8856		360	1.5991	1.9251	2.6388		360	2.4699	2.6222	2.6305		360	2.8403	2.8082	2.7585		360	2.3636	2.6854	2.9678
361	2.6605	2.5404	2.7258		361	1.4422	2.1628	2.7012		361	2.3596	2.6253	2.5735		361	2.8975	2.8098	2.9153		361	2.4186	2.7481	3.0463
362	2.6835	2.4623	2.7619		362	1.431	2.0785	2.51		362	2.4046	2.6949	2.4703		362	2.9575	2.8464	2.7465		362	2.3919	2.6665	2.8863
363	2.7427	2.3525	2.9063		363	1.4497	1.9599	2.5433		363	2.453	2.5738	2.513		363	2.7142	2.703	3.0567		363	2.2568	2.6362	2.839
364	2.822	2.4101	2.829		364	1.7127	2.0695	2.5873		364	2.5034	2.6209	2.5058		364	2.6933	2.7093	3.1348		364	2.3738	2.6937	2.7519
365	2.4395	2.3294	2.7589		365	1.8755	2.174	2.7341		365	2.5223	2.6809	2.4494		365	2.8957	2.8418	3.1241		365	2.363	2.5909	2.8828
366	2.5869	2.5636	2.7764		366	2.0348	1.9128	2.6021		366	2.4614	2.6767	2.4659		366	2.8066	2.823	2.7494		366	2.3076	2.7217	3.0062
367	2.778	2.6213	2.7646		367	1.9612	2.025	2.601		367	2.377	2.6521	2.6239		367	2.8389	2.8873	2.9056		367	2.3147	2.8591	3.0367
368	2.5888	2.6586	2.8429		368	1.8265	1.8682	2.7038		368	2.3597	2.6416	2.6156		368	2.6979	3.0429	2.8024		368	2.412	2.6612	2.9359
369	2.6098	2.4399	2.8238		369	2.3169	2.012	2.6178		369	2.5175	2.7118	2.6681		369	2.8017	2.9277	2.765		369	2.3989	2.652	3.047
370	2.7793	2.417	2.749		370	1.7283	1.9589	2.6795		370	2.4893	2.6513	2.7198		370	2.712	2.7659	3.0444		370	2.3562	2.7369	3.1808
371	2.7998	2.3611	2.929		371	1.661	1.9697	2.6942		371	2.755	2.7356	2.6814		371	2.7582	2.8349	3.1725		371	2.4267	2.7602	2.9587
372	2.6889	2.3054	2.8181		372	1.8951	2.0581	2.6164		372	2.6595	2.7036	2.7386		372	2.6494	2.779	3.0657		372	2.1381	2.7186	3.1646
373	2.6117	2.3969	2.7437		373	1.689	2.0072	2.502		373	2.7145	2.7645	2.7542		373	2.8593	2.9017	3.0884		373	2.2925	2.6977	3.0024
374	2.787	2.2784	2.8268		374	1.7008	1.9928	2.6825		374	2.6324	2.645	2.6933		374	2.8182	3.2716	3.177		374	1.9741	2.7981	2.9377
375	2.7942	2.3576	2.6768		375	1.5896	1.906	2.6393		375	2.4896	2.6419	2.6892		375	2.913	2.8375	3.1002		375	2.0412	2.6658	2.9822
376	2.6373	2.3763	2.7176		376	1.6801	1.9254	2.5628		376	2.4212	2.6459	2.6035		376	2.9746	3.0159	3.0658		376	2.1978	2.9115	2.9855
377	2.8288	2.5029	2.814		377	1.8098	1.9172	2.6518		377	2.5437	2.6083	2.4201		377	2.8214	2.8832	3.1863		377	1.9667	2.655	3.0452
378	2.7177	2.6324	2.8352		378	2.0082	1.8948	2.6616		378	2.4814	2.6402	2.6704		378	2.874	2.9671	3.2694		378	1.7844	2.5265	3.008
379	2.7414	2.7032	2.7493		379	1.9115	1.9381	2.7632		379	2.5526	2.6639	2.6909		379	2.9403	2.9784	3.1289		379	1.9113	2.7481	2.9398
380	2.7545	2.5643	2.6101		380	1.8347	2.0056	2.8191		380	2.5314	2.6657	2.7907		380	2.9978	3.0025	3.1181		380	1.9194	2.6822	2.9375
381	2.6171	2.4353	2.6324		381	1.9982	2.0215	2.6876		381	2.5929	2.5822	2.67		381	2.9646	2.9118	2.9669		381	1.9768	2.7267	2.9304
382	2.6167	2.998	2.5367		382	1.9543	1.8595	2.6193		382	2.4994	2.6741	2.7276		382	2.7601	2.9912	3.1523		382	1.8415	2.7233	2.9416
383	2.6912	2.908	2.6821		383	1.7823	1.9835	2.7312		383	2.5058	2.7351	2.5859		383	3.0151	2.9997	3.1123		383	1.8642	2.6994	2.9483
384	2.884	2.5974	2.7178		384	1.9481	1.9214	2.7407		384	2.5199	2.7223	2.6953		384	3.0189	2.9823	3.0069		384	1.9413	2.6774	3.0074
385	2.8726	2.5683	2.5206		385	1.9773	2.1374	2.7726		385	2.6641	2.7285	2.716		385	3.1494	3.0076	3.0293		385	1.9569	2.7272	3.123
386	2.7873	2.4951	2.6321		386	1.7796	2.0424	2.6835		386	2.6511	2.5842	2.7613		386	3.1287	3.0065	2.8581		386	2.157	2.6966	3.0018
387	2.6979	2.8842	2.6224		387	2.1816	1.6808	2.623		387	2.7424	2.6779	2.6275		387	3.0803	2.9893	2.8428		387	2.1121	2.7871	2.8671
388	2.6623	2.7786	2.5029		388	1.9305	2.034	2.6082		388	2.462	2.6311	2.8393		388	3.0053	3.1385	2.8766		388	2.1368	2.7287	2.9525
389	2.7328	2.611	2.6705		389	1.6931	1.9964	2.6266		389	2.5414	2.5387	2.838		389	2.7875	3.1853	2.7542		389	2.0304	2.775	3.0051
390	2.7796	2.5961	2.6506		390	2.1639	2.0248	2.6875		390	2.3678	2.6943	2.772		390	2.7537	3.0499	2.9644		390	1.9075	2.6592	2.9911
391	2.8408	2.9003	2.6216		391	1.8237	2.136	2.6856		391	2.5188	2.6415	2.8344		391	2.7271	3.0209	2.9116		391	2.0134	2.6969	2.9157
392	2.7218	2.6818	2.8213		392	1.963	2.1421	2.6819		392	2.7237	2.6087	2.8243		392	2.8085	3.0577	2.8374		392	2.058	2.8267	2.9212
393	2.6936	2.881	2.6765		393	1.884	2.0025	2.6511		393	2.5361	2.6033	2.7763		393	2.7099	3.0561	2.7561		393	2.1019	2.67	2.962
394	2.7433	2.6639	2.7497		394	1.8854	2.1073	2.7207		394	2.6356	2.569	2.8689		394	2.9133	3.0693	2.8956		394	2.1944	2.7053	2.9066
395	2.7266	2.6277	2.7136		395	2.2782	2.0581	2.5993		395	2.6305	2.5279	2.7279		395	2.6784	2.9752	2.8622		395	2.0644	2.6904	2.8875
396	2.6209	2.989	2.5427		396	2.0886	2.0806	2.7557		396	2.6009	2.5115	2.766		396	2.773	3.0795	3.0287		396	1.8815	2.7307	2.8884
397	2.701	2.6021	2.7746		397	2.2615	1.8797	2.781		397	2.4794	2.6156	2.6659		397	2.7488	3.2028	3.1268		397	1.9942	2.6755	2.963
398	2.7206	2.5048	2.5961		398	2.3463	1.9261	2.7191		398	2.4556	2.7704	2.7208		398	2.7604	2.9428	3.0906		398	1.9716	2.6156	2.8458
399	2.6966	2.5437	2.7906		399	2.1409	1.6584	2.7926		399	2.6125	2.6171	2.7074		399	2.7141	2.9428	3.1688		399	2.067	2.6572	2.8689
400	2.8111	2.6463	2.7151		400	2.0548	1.3428	2.7134		400	2.418	2.4376	2.7091		400	2.6503	3.1421	3.0753		400	1.9493	2.7072	2.8824
401	2.7503	2.5433	2.6942		401	2.1987	1.2448	2.7089		401	2.2906	2.502	2.6487		401	2.6201	3.1731	3.1822		401	2.0295	2.7474	2.9194
402	2.6342	2.6073	2.7754		402	2.1954	1.5248	2.6901		402	2.3981	2.5313	2.6309		402	2.5981	2.8132	3.163		402	1.9717	2.7179	2.8925
403	2.6086	2.7158	2.7376		403	2.0763	1.8555	2.5855		403	2.4127	2.3539	2.4244		403	2.655	3.0134	3.1911		403	1.9377	2.7533	3.0036
404	2.7062	2.5235	2.7248		404	1.8427	1.7434	2.745		404	2.3389	2.6957	2.6777		404	2.7362	2.9944	3.1288		404	2.035	2.6909	3.0349
405	2.3306	2.761	2.7028		405	1.8158	2.1298	2.7111		405	2.4523	2.5608	2.5022		405	2.6878	3.0215	3.234		405	1.9986	2.6403	2.9253
406	2.384	2.6961	2.7606		406	1.8756	2.1703	2.7419		406	2.2886	2.585	2.6213		406	2.7003	2.9978	3.1436		406	1.9399	2.7574	2.9352
407	2.4159	2.7452	2.7003		407	1.9356	1.8313	2.6314		407	2.2888	2.6373	2.4444		407	2.6182	2.9232	3.0924		407	1.9608	2.7662	2.9758
408	2.0858	2.5085	2.5588		408	1.9273	1.5752	2.7337		408	2.6098	2.6	2.5937		408	2.6769	3.0033	3.0455		408	2.1261	2.8932	2.9892
409	2.0563	2.7086	2.7316		409	2.2119	2.1399	2.5715		409	2.4633	2.5477	2.4735		409	2.7082	2.9184	3.152		409	2.0547	2.7943	2.9939
410	2.3435	2.7871	2.6818		410	2.4773	1.9775	2.6248		410	2.4341	2.6285	2.6655		410	3.0232	3.0417	3.1637		410	1.9662	2.8844	2.9255
411	2.3289	2.86	2.7181		411	2.3432	1.7405	2.7555		411	2.3679	2.5829	2.574		411	2.8651	2.998	3.0146		411	1.9779	2.8101	2.9364
412	2.2263	2.75	2.6571		412	2.4161	1.7342	2.6018		412	2.3938	2.4741	2.6461		412	2.9001	2.9873	3.1601		412	2.1152	2.7744	2.901
413	2.455	2.7185	2.5187		413	2.133	1.9098	2.7203		413	2.3592	2.481	2.5795		413	2.7229	2.9168	3.041		413	2.0871	2.7916	2.9091
414	2.4489	2.8355	2.5839		414	2.0834	2.2543	2.68		414	2.3007	2.5595	2.6239		414	2.6962	2.9814	2.9691		414	2.0335	2.8113	2.9994
415	2.9867	2.5029	2.7123		415	1.9832	1.947	2.8679		415	2.328	2.524	2.5259		415	2.6543	3.017	2.9382		415	2.2019	2.8034	2.9564
416	2.7694	2.7296	2.6116		416	2.1591	1.9553	2.723		416	2.5341	2.4724	2.7674		416	2.7382	2.9921	3.0772		416	2.026	2.9009	3.0095
417	2.8606	2.6994	2.6099		417	2.1597	1.8818	2.7067		417	2.3247	2.5761	2.5466		417	2.7453	2.8168	3.0586		417	2.0118	2.7222	2.987
418	2.8046	2.6519	2.7899		418	2.0712	1.6937	2.6829		418	2.3995	2.528	2.7198		418	2.5861	2.8599	3.1695		418	2.0958	2.8364	2.9904
419	2.8839	2.571	2.6866		419	2.0664	1.7453	2.6467		419	2.4271	2.5536	2.5828		419	2.7757	2.8757	3.1223		419	1.9949	2.9143	3.1015
420	2.8073	2.5366	2.6751		420	2.0457	1.6581	2.7149		420	2.4014	2.5157	2.5853		420	2.7654	2.8073	2.883		420	2.0492	2.9036	2.9182
421	2.8573	2.591	2.4435		421	2.1567	1.4339	2.705		421	2.4548	2.7622	2.6727		421	2.8376	2.7059	3.0322		421	2.0085	2.7355	2.8858
422	2.8046	2.7061	2.6133		422	2.168	1.5875	2.7317		422	2.5977	2.4384	2.5175		422	3.013	2.767	3.0658		422	2.1052	2.7286	2.9246
423	2.7747	2.6264	2.7303		423	2.008	1.8136	2.7044		423	2.4286	2.5242	2.5578		423	2.6823	2.867	3.2603		423	2.0508	2.7022	2.8764
424	2.7671	2.6669	2.8016		424	1.8315	1.5624	2.7573		424	2.5514	2.5052	2.5688		424	2.8591	2.8472	3.0819		424	1.9516	2.7644	3.0144
425	2.8013	2.6981	2.7545		425	1.8525	1.7396	2.7643		425	2.2627	2.5454	2.6119		425	2.6728	2.812	3.069		425	2.1998	2.7385	2.9528
426	2.7857	2.698	2.7972		426	2.1446	1.7689	2.7275		426	2.5202	2.5553	2.6877		426	2.7752	2.9976	2.9847		426	2.0607	2.8329	2.9451
427	2.7096	2.5345	2.7793		427	1.9785	1.7443	2.7651		427	2.4169	2.6056	2.4757		427	2.892	2.8756	2.8897		427	2.0604	2.7321	2.9945
428	2.751	2.6459	2.7562		428	1.942	1.8499	2.6079		428	2.4651	2.6969	2.5201		428	3.0451	2.901	3.011		428	2.1365	2.8349	3.0896
429	2.4956	2.6812	2.8306		429	2.2051	1.8001	2.6668		429	2.4359	2.6081	2.4797		429	2.821	2.9854	3.2949		429	2.0441	2.7541	2.9942
430	2.6478	2.6908	2.7544		430	1.9578	1.97	2.5615		430	2.5356	2.469	2.4722		430	2.7365	2.9931	3.1788		430	2.0006	2.7839	3.1331
431	2.7292	2.6261	2.7276		431	2.1247	1.85	2.7173		431	2.5524	2.5951	2.526		431	2.7267	2.9232	3.0417		431	1.8789	2.7745	3.1157
432	2.7766	2.7171	2.7604		432	2.2811	1.863	2.7166		432	2.3468	2.5102	2.5146		432	2.7397	2.8483	2.8403		432	2.0723	2.8375	3.0036
433	2.6117	2.6123	2.7097		433	1.9079	1.8427	2.7619		433	2.3551	2.6247	2.4977		433	2.5213	2.8986	2.9324		433	1.9829	2.8099	2.98
434	2.6617	2.6872	2.8072		434	2.0582	1.6261	2.6311		434	2.3633	2.6663	2.5049		434	2.7051	3.0467	2.7997		434	2.1034	2.801	3.0087
435	2.7453	2.6242	2.7553		435	1.8298	1.9675	2.6628		435	2.2754	2.5932	2.615		435	2.6227	2.9628	3.0584		435	2.1665	2.7063	3.0826
436	2.5897	2.7592	2.7773		436	1.7658	1.7875	2.7071		436	2.324	2.7248	2.6076		436	2.8104	2.919	2.9111		436	2.128	2.6519	3.0264
437	2.6722	2.6647	2.6906		437	1.7096	2.0589	2.7049		437	2.3999	2.9164	2.46		437	2.7653	2.799	3.1387		437	2.2245	2.7454	2.9909
438	2.7339	2.6509	2.7971		438	1.8426	1.8312	2.742		438	2.3178	2.8281	2.5957		438	2.767	2.9005	3.0959		438	2.0678	2.7935	2.9857
439	2.7558	2.5743	2.7571		439	1.8102	2.0204	2.618		439	2.3585	2.7551	2.6224		439	2.8431	2.7895	3.0143		439	2.1079	2.7246	3.0323
440	2.7509	2.6641	2.7031		440	1.8378	2.0441	2.6628		440	2.1974	2.5489	2.5102		440	2.9651	2.7873	3.1525		440	2.1731	2.6142	2.9923
441	2.7054	2.5367	2.7562		441	1.8147	2.0307	2.6694		441	2.3489	2.7566	2.4994		441	2.8098	2.7731	3.1179		441	2.1273	2.6178	2.9719
442	2.6014	2.6466	2.8111		442	1.7983	2.0474	2.6527		442	2.27	2.7875	2.5188		442	2.7727	2.8378	3.1001		442	2.2165	2.774	3.0238
443	2.6579	2.5158	2.7258		443	1.6464	1.9951	2.6373		443	2.487	2.6805	2.5258		443	2.8727	2.7412	3.1799		443	2.2274	2.7037	2.969
444	2.6888	2.6425	2.6771		444	1.5426	1.8005	2.6051		444	2.5553	2.8515	2.7001		444	3.001	2.7538	3.1985		444	2.1956	2.6971	2.9586
445	2.6836	2.4781	2.7769		445	1.6956	1.9329	2.5969		445	2.3974	2.7292	2.6686		445	2.7964	2.7288	3.1858		445	2.0885	2.6789	3.0406
446	2.7478	2.4942	2.649		446	1.7099	1.9912	2.587		446	2.3357	2.9039	2.6587		446	2.9168	2.8829	3.0435		446	2.2611	2.6172	3.0563
447	2.7447	2.5435	2.7363		447	1.7337	1.96	2.6403		447	2.344	2.8917	2.5171		447	3.0603	2.9116	3.1083		447	2.1501	2.5453	3.0168
448	2.4896	2.6127	2.6673		448	1.7137	2.0077	2.6756		448	2.3235	3.0042	2.6518		448	3.1826	2.7313	3.1484		448	2.1174	2.6249	3.0823
449	2.806	2.645	2.6915		449	1.6837	2.1617	2.6216		449	2.326	2.7369	2.6367		449	3.0975	2.8402	3.1566		449	2.1579	2.6325	3.0016
450	2.7654	2.6199	2.5688		450	1.7092	1.9406	2.8004		450	2.2754	2.9802	2.5111		450	2.9737	2.9047	3.1577		450	2.2299	2.8339	3.0093
451	2.6751	2.5888	2.705		451	1.8283	1.9394	2.6137		451	2.3107	2.7278	2.5516		451	2.7977	2.913	3.0891		451	2.2331	2.799	2.9283
452	2.7646	2.6065	2.6202		452	1.6503	1.5363	2.6376		452	2.3781	2.8485	2.515		452	2.6586	2.8456	3.0863		452	2.28	2.605	2.9244
453	2.6164	2.5214	2.6783		453	1.8414	2.145	2.7355		453	2.2361	2.8676	2.6449		453	2.9031	2.9203	3.0149		453	2.2068	2.6064	2.9067
454	2.6427	2.6782	2.778		454	2.0172	1.9966	2.6762		454	2.3813	2.8489	2.6078		454	2.7336	2.8763	3.1014		454	2.3998	2.6024	2.9522
455	2.5502	2.5794	2.7058		455	1.9167	1.6516	2.5702		455	2.392	2.8732	2.5906		455	2.7199	2.7457	3.0787		455	2.2674	2.6661	3.0378
456	2.698	2.6032	2.7848		456	1.838	1.9803	2.6241		456	2.3728	3.0227	2.5487		456	2.9954	2.7996	3.2153		456	2.1866	2.588	2.9351
457	2.66	2.5732	2.7766		457	1.7835	1.6982	2.6325		457	2.3084	2.8776	2.6708		457	2.6266	2.7937	3.1955		457	1.9887	2.7139	2.9963
458	2.7325	2.6628	2.7038		458	1.7153	2.2462	2.6313		458	2.3139	2.961	2.6553		458	2.7459	3.1167	3.1124		458	2.0952	2.7631	2.9094
459	2.7723	2.7363	2.9012		459	1.6932	2.2926	2.6459		459	2.1866	2.9253	2.6585		459	2.438	2.9472	3.0373		459	2.126	2.6729	3.0291
460	2.5718	2.6049	2.7306		460	1.8585	2.2103	2.7392		460	2.3435	2.9162	2.5825		460	2.8629	2.8247	3.0845		460	2.0716	2.6744	3.0229
461	2.6202	2.5269	2.6979		461	1.8001	2.1846	2.673		461	2.5641	2.7105	2.6042		461	2.649	2.9916	3.0486		461	2.1659	2.7235	3.073
462	2.6766	2.4899	2.6388		462	1.6616	2.2696	2.6476		462	2.3221	2.7114	2.7274		462	2.8805	2.8102	3.0811		462	2.2	2.6801	3.0752
463	2.4811	2.7202	2.5873		463	1.662	2.1232	2.6445		463	2.4003	2.7825	2.5666		463	2.8775	2.9229	2.8889		463	2.216	2.9078	3.1318
464	2.6696	2.6624	2.5558		464	1.8432	2.3159	2.7564		464	2.3566	2.8184	2.5757		464	2.7338	3.0398	2.8869		464	2.2367	2.8643	2.9928
465	2.7692	2.7055	2.7475		465	1.6939	2.2593	2.7011		465	2.2029	2.7751	2.6036		465	3.0523	2.9864	2.9362		465	2.1425	2.7041	3.0212
466	2.6649	2.7519	2.7622		466	1.5895	2.26	2.6845		466	2.4917	2.5652	2.429		466	2.9041	2.7479	3.0365		466	2.1227	2.8249	3.1032
467	2.6217	2.7276	2.7313		467	1.4265	2.1809	2.7598		467	2.3815	2.7238	2.5334		467	3.0713	2.8241	3.0937		467	2.0971	2.7925	3.0604
468	2.6676	2.9259	2.6229		468	1.6145	2.3317	2.6749		468	2.3545	2.7891	2.6923		468	2.8962	2.9713	3.0082		468	2.2344	2.7714	3.0313
469	2.4307	2.6252	2.6633		469	1.5118	1.9146	2.6502		469	2.139	2.9313	2.7437		469	3.1236	3.2552	3.0898		469	2.3028	2.8467	3.0051
470	2.4681	2.5999	2.786		470	1.8243	2.0945	2.6537		470	2.3592	2.6351	2.686		470	2.9373	3.088	2.9159		470	2.2607	2.7359	2.9899
471	2.4315	2.6553	2.7119		471	1.5311	2.2489	2.6163		471	2.3875	2.8791	2.8288		471	2.7169	2.8251	2.9018		471	2.2367	2.8076	3.0894
472	2.5382	2.9147	2.6829		472	1.5807	1.9151	2.7653		472	2.2624	2.8436	2.6615		472	2.9628	2.9726	3.0148		472	2.2832	2.8087	2.9972
473	2.6678	2.82	2.74		473	1.6352	2.048	2.8037		473	2.3257	2.7929	2.5744		473	3.0942	3.1052	3.128		473	2.299	2.8033	3.0111
474	2.6601	2.8523	2.7528		474	1.7048	1.6174	2.7053		474	2.2937	2.9942	2.339		474	2.9128	2.9583	2.9826		474	2.1639	2.8446	3.1037
475	2.7422	2.9957	2.8018		475	1.7123	1.6167	2.6931		475	2.4465	2.9495	2.3958		475	2.928	2.7055	3.07		475	2.2806	2.8126	3.0893
476	2.7763	2.8962	2.7234		476	1.6032	1.9293	2.83		476	2.4114	2.9085	2.5145		476	2.8564	2.7603	3.1211		476	2.3161	2.8537	3.0631
477	2.6754	2.797	2.9063		477	1.6348	1.7927	2.7342		477	2.237	2.9375	2.5354		477	2.9066	2.8935	3.1373		477	2.2362	2.8175	2.8983
478	2.6317	2.7555	2.7168		478	1.5993	1.3828	2.784		478	2.2956	2.8357	2.5519		478	2.7571	2.8014	2.9419		478	2.2337	2.8482	3.0529
479	2.7209	2.7798	2.8271		479	1.6808	1.7646	2.7075		479	2.2136	2.7379	2.6776		479	3.0055	2.8508	3.0363		479	2.2277	2.7487	3.0378
480	2.7888	2.7271	2.839		480	1.7147	1.7731	2.6328		480	2.2917	2.7131	2.6082		480	3.043	2.8311	3.075		480	2.3391	2.7591	2.9528
481	2.693	2.8387	2.8623		481	1.6721	1.8107	2.7177		481	2.2919	2.7597	2.7576		481	2.9714	2.9102	3.0212		481	2.1929	2.9067	3.0062
482	2.6566	2.8177	2.852		482	1.6077	1.6918	2.7281		482	2.4328	2.7018	2.5673		482	3.0258	2.8773	2.9216		482	2.2944	2.9343	2.9079
483	2.6883	2.9125	2.7262		483	1.715	1.8618	2.5655		483	2.4101	2.7724	2.6288		483	2.877	2.8893	3.0788		483	2.3022	2.7919	2.9568
484	2.7407	2.7136	2.9568		484	1.7669	1.7314	2.6793		484	2.4872	2.8865	2.5178		484	2.9004	2.7511	3.0889		484	2.2625	2.8698	2.993
485	2.647	2.6787	2.754		485	1.6389	1.7855	2.6281		485	2.6146	2.7903	2.4943		485	2.7443	2.8084	3.1241		485	2.0582	2.9737	2.9022
486	2.6492	2.6741	2.7443		486	1.8318	1.6578	2.6872		486	2.5372	2.7191	2.5196		486	2.7943	2.8512	2.9879		486	1.9881	2.7649	3.0279
487	2.6623	2.303	2.8311		487	1.6161	1.6043	2.6485		487	2.6256	2.8051	2.5035		487	2.7345	2.9701	3.0576		487	1.9944	2.7329	2.9945
488	2.6971	2.5768	2.9125		488	1.6018	1.4544	2.5894		488	2.423	2.8254	2.477		488	2.8225	2.9002	2.9556		488	2.1332	2.8027	2.8296
489	2.6602	2.549	2.846		489	1.5923	2.0268	2.5736		489	2.325	2.7951	2.4777		489	2.7567	2.9547	3.1145		489	2.2327	2.8203	2.861
490	2.6179	2.7635	2.8114		490	1.4122	1.5317	2.5888		490	2.4339	2.7751	2.4237		490	2.6252	2.9535	3.0666		490	2.2032	2.7885	2.8761
491	2.6751	2.297	2.6995		491	1.7471	1.7498	2.5532		491	2.3005	2.7822	2.6834		491	2.7604	2.9123	3.2239		491	2.1451	2.7838	2.9986
492	2.7585	2.4158	2.6662		492	1.7946	1.7201	2.6391		492	2.1991	2.6575	2.7669		492	2.85	3.0095	3.1573		492	2.1409	2.7429	2.8849
493	2.6735	2.5567	2.6228		493	1.4868	1.8776	2.607		493	2.7893	2.7059	2.6574		493	2.6647	3.1644	3.1384		493	2.1201	2.808	2.9757
494	2.5776	2.6328	2.5701		494	1.5866	1.5781	2.5936		494	2.4335	2.6776	2.5034		494	2.853	3.0101	3.0773		494	2.2207	2.8556	2.8274
495	2.7036	2.7357	2.5423		495	1.4968	1.3968	2.513		495	2.5113	2.5949	2.681		495	2.8104	3.168	3.0993		495	2.0026	2.9796	2.8094
496	2.6369	2.5255	2.8485		496	1.3901	1.7736	2.6087		496	2.5454	2.5986	2.6925		496	2.8299	3.0289	3.1603		496	2.2108	2.8884	2.8704
497	2.6111	2.763	2.6947		497	1.4833	1.6911	2.5512		497	2.2163	2.731	2.7048		497	2.7642	3.1514	3.0408		497	2.2168	2.9222	2.8875
498	2.7743	2.7369	2.7956		498	1.3819	1.7507	2.5611		498	2.3122	2.6606	2.5735		498	2.7875	3.0579	3.0692		498	2.2325	2.9183	2.9337
499	2.8238	2.7393	2.6854		499	1.4706	1.73	2.5267		499	2.3966	2.876	2.5135		499	2.5739	2.9134	3.1637		499	2.0638	2.9654	2.8375
500	2.5414	2.6228	2.7989		500	1.5267	1.6065	2.5629		500	2.2403	2.5871	2.5806		500	2.7952	3.0197	3.1622		500	2.3217	2.9116	2.8999
501	2.7678	2.793	2.7826		501	1.413	1.8937	2.6985		501	2.3648	2.908	2.57		501	2.6379	3.0173	3.1337		501	2.3152	2.8667	2.9468
502	2.664	2.6445	2.7658		502	1.4338	1.6813	2.636		502	2.3153	2.7423	2.5798		502	2.6255	2.944	3.1165		502	2.2633	2.8356	2.9191
503	2.7235	2.4692	2.8725		503	1.4967	1.7348	2.5672		503	2.4621	2.7238	2.551		503	2.5696	2.9131	3.1017		503	2.1426	2.8478	2.9774
504	2.6716	2.4243	2.7608		504	1.6246	1.6199	2.7033		504	2.5451	2.8184	2.544		504	2.7021	3.021	2.9653		504	2.0745	2.9031	2.9533
505	2.6708	2.46	2.7192		505	1.6725	1.7539	2.6748		505	2.6471	2.7038	2.4198		505	2.62	3.0141	3.0453		505	2.1557	2.9569	2.9782
506	2.5603	2.4143	2.6687		506	1.5209	1.9353	2.6786		506	2.4414	2.7846	2.4972		506	2.7956	2.9963	3.1911		506	2.2487	2.9856	3.0069
507	2.3291	2.5874	2.8366		507	1.5033	2.1038	2.7277		507	2.4316	2.7495	2.4465		507	2.7582	2.974	3.1071		507	2.3065	2.876	2.9189
508	1.98	2.8401	2.6395		508	1.3577	2.0909	2.6047		508	2.341	2.8833	2.5797		508	2.748	2.9238	3.0905		508	2.2365	2.9311	3.0635
509	2.603	2.8391	2.6737		509	1.4352	2.3146	2.5834		509	2.356	2.5798	2.4211		509	2.6267	2.8462	3.1527		509	2.2624	3.002	2.9763
510	2.612	2.7668	2.751		510	1.5411	2.2807	2.7417		510	2.3381	2.7749	2.4631		510	2.5973	2.7342	3.0444		510	2.1702	2.8852	3.0973
511	2.6322	2.6715	2.8631		511	1.5515	2.3242	2.7924		511	2.3254	2.6909	2.6753		511	2.618	2.9059	3.026		511	2.1529	3.0818	2.9571
512	2.5347	2.5618	2.7153		512	1.4122	2.3964	2.7165		512	2.2457	2.6947	2.6207		512	2.752	2.8963	3.0759		512	2.1778	2.9969	2.9911
513	2.605	2.6545	2.7193		513	1.5666	2.1746	2.6829		513	2.3289	2.8372	2.6066		513	2.5592	2.974	3.0959		513	1.9985	3.0091	2.9458
514	2.7066	2.7991	2.9201		514	1.6155	2.1147	2.7243		514	2.3324	2.877	2.6714		514	2.642	2.8931	2.9896		514	2.0282	3.1014	2.9581
515	2.7773	2.5059	2.8419		515	1.5181	2.3093	2.745		515	2.3591	3.0265	2.7077		515	2.5528	2.8432	3.0651		515	2.0986	2.9619	2.9991
516	2.7018	2.424	2.7895		516	1.5496	2.1972	2.7146		516	2.446	2.882	2.6976		516	2.7524	2.9638	3.0047		516	2.0227	3.0676	3.0702
517	2.5306	2.2523	2.7789		517	1.5254	2.3031	2.7514		517	2.5611	2.8031	2.6036		517	2.7634	2.795	3.0227		517	2.0645	2.9769	2.9623
518	2.66	2.4908	2.3718		518	1.6182	2.1332	2.6495		518	2.3292	2.9877	2.7326		518	2.8077	2.8067	3.0364		518	1.9013	3.0074	2.9687
519	2.6555	2.2433	2.8069		519	1.6934	1.8028	2.6475		519	2.202	2.9447	2.6082		519	2.6882	3.1048	3.101		519	1.9162	2.8915	2.8875
520	2.5763	2.541	2.6509		520	1.7281	1.5621	2.7474		520	2.294	2.7882	2.7897		520	2.7703	2.9757	3.0708		520	2.0217	2.9979	2.8463
521	2.6983	2.6045	2.9011		521	1.687	1.4184	2.6972		521	2.409	2.9672	2.7492		521	2.613	2.7524	3.0411		521	2.0581	2.9839	2.7843
522	2.5858	2.4807	2.9778		522	1.6944	1.8241	2.6722		522	2.2865	2.8681	2.6747		522	2.7562	3.0424	3.1087		522	2.2752	2.8972	2.9301
523	2.6509	2.6374	2.8363		523	1.5925	1.9952	2.7465		523	2.3706	2.9424	2.5701		523	2.7877	3.0446	3.1988		523	2.212	2.9854	2.9307
524	2.484	2.4687	2.8108		524	1.6453	2.0412	2.7909		524	2.4516	2.9496	2.436		524	2.6242	2.9014	3.1143		524	2.1326	2.9458	2.8842
525	2.6524	2.8241	2.6965		525	1.5328	1.6932	2.7799		525	2.2478	2.9367	2.5343		525	2.7597	2.8924	3.139		525	2.0517	2.9108	2.7915
526	2.8216	2.616	2.7266		526	1.6175	1.5802	2.7259		526	2.3233	2.7852	2.3993		526	2.7769	3.0093	3.161		526	2.1425	2.8874	2.8131
527	2.575	2.9125	2.8229		527	1.5747	1.378	2.8371		527	2.2808	2.8987	2.717		527	2.5996	2.9085	3.1777		527	2.1126	2.9414	2.9109
528	2.6851	2.6741	2.7582		528	1.5392	1.8074	2.7142		528	2.2249	2.9621	2.6808		528	2.7959	2.929	3.1221		528	2.0555	3.0786	2.9484
529	2.6342	2.7044	2.716		529	1.5908	1.5708	2.834		529	2.157	3.0296	2.6493		529	2.7908	2.9094	3.056		529	2.0026	3.0141	2.9783
530	2.7428	2.5167	2.745		530	1.7172	1.7556	2.8291		530	2.3125	3.0805	2.5198		530	2.7918	3.0401	3.1149		530	2.1154	2.9218	2.945
531	2.5003	2.6968	2.7553		531	1.6631	1.8732	2.807		531	2.2518	3.0245	2.7941		531	2.6159	3.0262	2.9966		531	2.1811	2.9871	2.9282
532	2.5239	2.4777	2.8777		532	1.8006	1.5481	2.8452		532	2.3482	2.825	2.642		532	2.7151	3.0798	3.0466		532	2.0784	2.8703	2.966
533	2.5992	2.2581	2.7649		533	1.5264	1.6268	2.8312		533	2.4691	2.9011	2.612		533	2.6542	3.0008	3.02		533	2.1129	2.9295	2.9743
534	2.7247	2.707	2.8152		534	1.5698	1.7853	2.7587		534	2.2423	2.9196	2.6033		534	2.827	3.0533	3.092		534	2.0673	2.9443	3.1768
535	2.2676	2.5719	2.7093		535	1.6577	1.7479	2.598		535	2.1515	2.9175	2.6411		535	2.6521	3.0296	3.0629		535	2.0967	2.9836	3.0436
536	2.5378	2.8281	2.6079		536	1.713	1.9308	2.7442		536	2.2497	2.9166	2.6547		536	2.6802	3.0968	3.0806		536	2.2591	2.9439	2.9668
537	2.7026	2.5855	2.5531		537	1.5918	1.8543	2.7537		537	2.3347	2.96	2.7521		537	2.7162	2.8992	3.0867		537	2.2331	2.9238	3.0005
538	2.8483	2.4355	2.7753		538	1.621	1.9048	2.7573		538	2.1366	2.8624	2.6372		538	2.6794	2.9541	3.0461		538	2.3087	2.9358	2.9869
539	2.6533	2.5449	2.8299		539	1.6743	1.9684	2.8123		539	2.2504	2.6702	2.5062		539	3.1039	2.9916	3.0657		539	2.297	2.8994	2.8003
540	2.6638	2.6414	2.1847		540	1.6134	1.8342	2.7356		540	2.3487	2.7004	2.7531		540	3.0442	2.8701	3.1079		540	2.2758	2.9211	2.9128
541	2.7045	2.748	2.7403		541	1.6688	2.1698	2.7387		541	2.3842	2.7475	2.6861		541	2.5574	2.9313	3.107		541	2.2586	3.0342	2.8109
542	2.6575	2.6302	2.8159		542	1.8101	1.9885	2.7063		542	2.5226	2.837	2.635		542	2.7486	2.9981	3.0435		542	2.2445	2.975	2.9173
543	2.7155	2.688	2.739		543	1.6244	1.7292	2.7171		543	2.3365	2.7783	2.619		543	2.7793	2.8948	3.0484		543	2.3043	2.961	3.0514
544	2.6905	2.434	2.5799		544	1.8873	1.8758	2.7592		544	2.3803	2.8819	2.4974		544	2.6148	2.9111	2.9111		544	2.3993	3.0237	2.9022
545	2.6337	2.7341	2.2945		545	1.7098	1.9477	2.7526		545	2.34	2.8911	2.5445		545	2.6762	2.8718	3.0923		545	2.5236	2.9513	3.1387
546	2.7999	2.3776	2.0454		546	1.7958	1.6287	2.8507		546	2.3285	2.6409	2.5319		546	2.848	2.8308	3.1215		546	2.3318	3.0132	2.9882
547	2.7017	2.718	2.1347		547	1.6496	1.7167	2.7308		547	2.3743	2.8597	2.4966		547	2.7219	2.9131	3.0148		547	2.3726	2.9526	2.9925
548	2.708	2.6757	2.5071		548	1.6939	1.4689	2.8163		548	2.351	2.8355	2.4339		548	2.6828	2.9519	2.9845		548	2.3224	2.9945	3.0433
549	2.6542	2.9124	2.3425		549	1.7146	1.3344	2.7923		549	2.3371	2.8738	2.4006		549	2.783	2.7899	3.075		549	2.3472	2.955	3.1063
550	2.559	2.8654	2.3125		550	1.7462	1.5074	2.7733		550	2.4682	2.9695	2.6085		550	2.707	2.9076	3.1242		550	2.2767	3.014	2.8596
551	2.5816	3.274	2.0879		551	1.6932	1.6794	2.8784		551	2.4845	2.8553	2.7365		551	2.7248	2.8375	3.0828		551	2.3177	3.08	2.8363
552	2.6441	2.9253	2.0633		552	1.7822	1.5506	2.7103		552	2.1427	2.746	2.5868		552	2.6402	2.9187	3.1259		552	2.3304	2.977	2.8077
553	2.4789	3.2091	2.3958		553	1.8091	1.4319	2.8051		553	2.3117	2.5149	2.6702		553	2.589	2.8097	3.1312		553	2.3787	2.8962	2.8929
554	2.6911	3.2029	2.4135		554	2.0202	1.5604	2.839		554	2.2255	2.814	2.75		554	2.7773	2.8265	3.141		554	2.2752	2.9022	2.9211
555	2.237	3.0076	2.226		555	1.7414	1.6887	2.7164		555	2.4723	2.96	2.6546		555	2.6649	2.7924	3.0761		555	2.3681	2.8848	2.9436
556	2.3846	3.055	2.5437		556	1.793	1.6893	2.7819		556	2.3972	2.6372	2.6013		556	2.6401	2.7677	3.1477		556	2.4153	2.9239	2.9288
557	2.6061	3.0745	2.4733		557	1.6948	1.5904	2.7872		557	2.5057	2.6616	2.6437		557	2.7276	2.8805	3.1507		557	2.4526	2.955	2.777
558	2.7516	2.9863	2.6918		558	1.7264	1.5738	2.7775		558	2.0948	2.7305	2.6221		558	2.6344	2.8057	3.1207		558	2.2318	2.9263	2.8574
559	2.5641	3.0046	2.3954		559	1.77	1.6329	2.8303		559	2.1928	2.8757	2.6388		559	2.5587	2.8104	3.1388		559	2.2154	2.8672	2.9547
560	2.614	3.0815	2.4544		560	1.7278	1.963	2.7238		560	2.3744	2.8759	2.6974		560	2.695	2.6964	3.0788		560	2.2525	2.9798	2.9155
561	2.6805	2.8686	2.3287		561	1.5959	1.5804	2.7162		561	2.2485	2.7264	2.675		561	2.6589	2.7575	3.1788		561	2.2324	2.9567	2.8518
562	2.6627	3.208	2.4105		562	1.5679	1.2614	2.8082		562	2.1853	2.9068	2.7136		562	2.7515	2.9218	3.018		562	2.2717	2.9802	2.8792
563	2.6543	3.3497	2.5832		563	1.6644	1.5519	2.9107		563	2.1435	2.7443	2.5982		563	2.6183	2.8637	2.9819		563	2.3145	3.0345	2.9591
564	2.7085	3.1012	2.5692		564	1.5819	1.5179	2.8801		564	2.3333	2.8224	2.7091		564	2.6936	2.9357	3.1236		564	2.396	3.0653	2.9464
565	2.7276	3.1702	2.5049		565	1.7152	1.9366	2.8728		565	2.2432	2.6311	2.5034		565	2.7396	2.9057	3.1183		565	2.286	2.956	2.8607
566	2.6169	3.2709	2.4385		566	1.6645	1.6569	2.9239		566	2.3388	2.6878	2.6834		566	2.7959	2.8548	3.1327		566	2.5123	2.9611	2.8199
567	2.7136	3.1952	2.4492		567	1.737	1.8024	2.9047		567	2.3591	2.7777	2.6274		567	2.7506	2.8303	3.1157		567	2.5734	2.9385	2.9521
568	2.8625	3.1455	2.6109		568	1.6544	1.9956	2.8161		568	2.3228	2.8798	2.6466		568	2.7505	2.7411	3.0363		568	2.5594	2.9349	2.8694
569	2.7049	3.1284	2.6289		569	1.6917	2.1224	2.9405		569	2.2762	2.7938	2.3876		569	2.6364	2.928	3.1994		569	2.4648	2.9911	2.953
570	2.4809	2.6692	2.5177		570	1.6552	1.9644	2.921		570	2.4622	2.8416	2.4741		570	2.619	3.1187	3.083		570	2.2951	2.8592	2.9081
571	2.4832	2.6814	2.5506		571	1.7519	2.1822	2.8634		571	2.3246	2.7437	2.6703		571	2.6701	3.1346	3.1173		571	2.4723	2.853	2.7982
572	2.3384	2.534	2.0926		572	1.6781	2.0067	2.8472		572	2.4229	2.8939	2.4923		572	2.6969	3.1221	3.0287		572	2.5028	2.9104	2.7875
573	2.395	3.0081	2.5999		573	1.6845	1.6895	2.8811		573	2.3617	2.7818	2.5326		573	2.7471	3.1381	3.0353		573	2.5581	2.7802	2.8181
574	2.2081	2.5547	2.5387		574	1.6866	1.7919	2.7901		574	2.3208	2.8115	2.6768		574	2.5651	2.9846	3.2155		574	2.3788	2.8059	2.9115
575	2.1282	2.6545	2.5053		575	1.6711	2.0754	2.7891		575	2.3868	2.7695	2.6165		575	2.661	2.7186	3.1248		575	2.3818	2.8476	2.9208
576	2.4241	2.7741	2.5022		576	1.692	1.8695	2.8927		576	2.2159	2.6901	2.6365		576	2.7092	2.7894	3.0975		576	2.3142	2.7981	2.9644
577	2.3266	2.642	2.153		577	1.7471	1.978	2.826		577	2.3435	2.5602	2.5382		577	2.6534	2.8457	3.1257		577	2.3584	2.7652	3.0593
578	2.4961	2.8375	2.4148		578	1.7123	1.8656	2.8871		578	2.3988	2.5889	2.6056		578	2.8302	2.953	3.226		578	2.4489	2.729	2.9363
579	2.3574	2.9169	2.5747		579	1.7413	2.0004	2.7997		579	2.4066	2.5521	2.6265		579	2.4279	3.0053	3.156		579	2.3111	2.7085	2.9061
580	2.7405	2.6328	2.5716		580	1.7326	1.9682	2.9718		580	2.3716	2.5831	2.6016		580	2.6757	2.8401	3.0478		580	2.3431	2.7208	2.9549
581	2.3643	3.0514	2.45		581	1.8249	1.6435	2.8906		581	2.3251	2.6499	2.5626		581	2.6139	2.981	3.0925		581	2.405	2.6473	2.9583
582	2.208	2.976	2.7405		582	1.6653	1.7393	2.8524		582	2.3544	2.6155	2.5458		582	2.595	3.0561	3.1213		582	2.3476	2.7057	2.9071
583	2.3308	3.0327	2.8132		583	1.7793	1.556	2.809		583	2.2579	2.6324	2.5668		583	2.5964	2.9431	3.0717		583	2.3038	2.8227	2.9224
584	2.2596	3.1671	2.3558		584	1.7293	1.767	2.774		584	2.3366	2.671	2.5308		584	2.5907	3.2649	3.151		584	2.2733	2.7569	2.9678
585	2.3648	2.8307	2.4158		585	1.8266	2.0092	2.7919		585	2.3405	2.7101	2.5169		585	2.7308	3.2244	3.1807		585	2.4682	2.9033	2.9583
586	2.4053	2.8316	2.2015		586	1.7243	1.2251	2.7866		586	2.439	2.893	2.3568		586	2.6252	3.1504	3.1599		586	2.5198	2.7365	3.0415
587	2.3001	2.752	3.083		587	1.6692	1.2465	2.9344		587	2.472	2.7845	2.4869		587	2.7725	3.1181	3.0718		587	2.4367	2.7203	2.9599
588	2.5223	2.7139	3.0529		588	1.5883	1.9031	2.8072		588	2.4885	2.784	2.6494		588	2.6703	3.2805	3.1935		588	2.4879	2.7255	2.9105
589	2.5719	2.7469	2.9926		589	1.5388	2.1757	2.7586		589	2.3116	2.6809	2.4898		589	2.7604	3.2455	3.1559		589	2.4403	2.7473	3.0124
590	2.3082	2.249	2.7067		590	1.4768	1.8182	2.7345		590	2.4974	2.8891	2.6021		590	2.8388	3.213	3.1365		590	2.544	2.7342	3.0038
591	2.3955	2.2983	2.5477		591	1.4863	1.6274	2.9296		591	2.3383	2.8857	2.5473		591	2.9623	3.2595	3.1246		591	2.4146	2.766	2.9464
592	2.4842	2.2346	2.4333		592	1.4931	1.6924	2.8633		592	2.2662	2.8862	2.4185		592	2.7919	2.8925	3.0335		592	2.379	2.7689	3.0935
593	2.4493	2.3823	2.2543		593	1.5742	1.4936	2.8106		593	2.3924	2.9299	2.4443		593	2.8208	2.8981	3.2019		593	2.5039	2.6759	2.9542
594	2.4793	2.3316	2.2337		594	1.642	1.8396	2.8906		594	2.3438	2.8523	2.4246		594	2.8646	2.9645	3.0826		594	2.5333	2.6875	2.8731
595	2.6815	2.2413	2.2748		595	1.6541	1.5891	2.9356		595	2.307	2.8454	2.3482		595	2.9	2.8682	3.0556		595	2.5152	2.5329	2.8306
596	2.7666	2.3431	2.3413		596	1.719	2.0917	2.8385		596	2.2942	2.8597	2.4587		596	2.7268	2.9844	3.1291		596	2.4233	2.6669	2.8801
597	2.5183	2.5968	2.58		597	1.6485	1.7849	2.8655		597	2.2385	2.5802	2.4939		597	2.6573	2.8401	3.1357		597	2.5464	2.6364	2.8778
598	2.4731	2.5181	2.54		598	1.7064	1.8361	2.8159		598	2.3265	2.78	2.3834		598	2.776	2.8758	3.1382		598	2.5337	2.7093	2.8722
599	2.2321	2.4753	2.4195		599	1.786	2.1407	2.7957		599	2.2174	2.6602	2.4857		599	2.794	2.9126	3.1235		599	2.6347	2.7123	3.0934
600	2.2422	2.3574	2.6304		600	1.6171	2.3009	2.7177		600	2.139	2.6178	2.4213		600	2.6818	2.9648	3.1558		600	2.5047	2.6973	2.9765
601	2.4831	2.6158	2.4717		601	1.7881	2.2724	2.7525		601	2.3747	2.6674	2.5341		601	2.7548	2.8111	3.1967		601	2.537	2.6924	3.0004
602	2.3878	2.5037	2.633		602	1.6857	2.0157	2.7904		602	2.3978	2.6362	2.42		602	2.7758	2.8138	3.1252		602	2.545	2.7966	2.8666
603	2.3576	2.6337	2.8928		603	1.6767	1.8957	2.7746		603	2.3484	2.636	2.5843		603	2.8666	2.9237	3.1676		603	2.4795	2.8673	2.84
604	2.5259	2.4345	2.4542		604	1.6574	1.6749	2.7036		604	2.305	2.7549	2.6867		604	2.6552	2.9544	3.2433		604	2.5446	2.6954	2.9188
605	2.3565	2.4311	2.4763		605	1.754	1.64	2.7648		605	2.2768	2.6185	2.5002		605	2.8977	3.0671	3.2812		605	2.4548	2.7414	2.7658
606	2.3247	2.6207	2.3726		606	1.6391	1.5597	2.7367		606	2.2749	2.6123	2.4447		606	2.6797	3.0503	3.225		606	2.5524	2.6739	2.8187
607	2.2528	2.4566	2.4515		607	1.6545	1.6433	2.6933		607	2.2409	2.6058	2.4326		607	2.7872	2.8693	3.2307		607	2.4167	2.6847	2.8901
608	2.5451	2.3612	2.2728		608	1.6772	1.8496	2.7432		608	2.2789	2.5921	2.4965		608	2.7239	2.8325	3.1987		608	2.3774	2.6555	3.0011
609	2.4232	2.4122	2.6405		609	1.9014	1.8543	2.7989		609	2.4411	2.63	2.6951		609	2.7729	2.923	3.1366		609	2.6942	2.6614	2.9923
610	2.3988	2.6982	2.9377		610	1.7858	1.8308	2.673		610	2.4012	2.4468	2.7515		610	2.6942	2.7925	3.1457		610	2.4842	2.7102	2.9765
611	2.436	2.4639	2.568		611	1.8036	1.5994	2.714		611	2.4631	2.6782	2.5817		611	2.7504	2.8361	3.1694		611	2.5764	2.6551	2.9402
612	2.3711	2.3494	2.528		612	1.6607	1.9498	2.7957		612	2.1883	2.5592	2.7204		612	2.6795	2.9295	3.103		612	2.5728	2.7101	2.937
613	2.4577	2.3951	2.5787		613	1.7507	1.8031	2.721		613	2.4293	2.5235	2.6891		613	2.6049	2.8621	3.1295		613	2.5741	2.6226	2.8336
614	2.4864	2.4027	2.6427		614	1.9065	1.7629	2.7567		614	2.4052	2.6043	2.7548		614	2.536	2.8414	3.2324		614	2.5135	2.7009	2.9093
615	2.2471	2.4067	2.7644		615	1.9192	1.9042	2.9104		615	2.3209	2.7056	2.6624		615	2.6761	3.0096	3.2871		615	2.5046	2.7038	3.1028
616	2.4119	2.424	2.7365		616	1.6787	2.0086	2.7659		616	2.2377	2.7701	2.5991		616	2.8397	2.8551	3.1422		616	2.4999	2.802	2.9133
617	2.3832	2.3664	2.8618		617	1.7281	1.8425	2.7088		617	2.2744	2.8425	2.4662		617	3.0145	3.0654	3.1633		617	2.5796	2.7804	2.9782
618	2.4579	2.5956	2.6788		618	1.9016	1.5751	2.7133		618	2.3737	2.9176	2.604		618	3.0329	2.9273	3.1915		618	2.5486	2.6868	2.8711
619	2.4549	3.0253	2.523		619	1.8489	1.8068	2.7676		619	2.6408	2.8	2.712		619	2.8891	2.8673	3.1258		619	2.4706	2.6008	2.8345
620	2.2863	2.4446	2.5469		620	1.6687	1.9148	2.6939		620	2.5463	2.7857	2.6643		620	2.7742	3.0131	3.2494		620	2.448	2.7583	2.8263
621	2.3319	2.6517	2.761		621	1.6813	1.8887	2.5945		621	2.4156	2.588	2.6335		621	2.9547	2.8442	3.2067		621	2.4619	2.6866	2.9539
622	2.3137	2.4824	2.5778		622	1.7614	1.6774	2.8523		622	2.5113	2.7952	2.6192		622	2.9263	2.8738	3.1836		622	2.4329	2.5987	2.8861
623	2.3159	2.9942	2.4707		623	1.7656	1.9516	2.7308		623	2.4802	2.8837	2.691		623	2.868	2.867	3.1368		623	2.5277	2.6263	2.8317
624	2.3347	2.9415	2.6074		624	1.5949	1.7793	2.6812		624	2.3351	3.0223	2.7082		624	2.9271	2.8595	3.2018		624	2.5347	2.643	2.8938
625	2.2502	2.7635	2.9114		625	1.5895	1.848	2.699		625	2.3976	2.7238	2.7087		625	2.9432	2.8236	3.0828		625	2.4986	2.6675	3.033
626	2.3061	2.5309	2.6521		626	1.6882	1.4103	2.7206		626	2.5098	2.7231	2.6781		626	2.9825	2.7928	3.0889		626	2.5038	2.603	2.9673
627	2.2531	2.3643	2.8321		627	1.5681	1.5766	2.8164		627	2.5668	2.9259	2.6106		627	2.9972	2.9574	3.1327		627	2.4757	2.6313	2.9149
628	2.3099	2.45	2.6351		628	1.7267	1.459	2.687		628	2.5753	2.7907	2.7181		628	2.9115	2.7487	3.2035		628	2.4548	2.7768	2.9324
629	2.2921	2.4042	2.7257		629	1.6867	1.4875	2.7416		629	2.5693	2.7201	2.7323		629	2.8847	2.8036	3.1172		629	2.461	2.6428	2.9276
630	2.2648	2.5054	2.5717		630	1.6859	1.6858	2.8393		630	2.6371	2.8417	2.79		630	2.9173	2.7113	3.2946		630	2.6084	2.8139	2.816
631	2.474	2.5811	2.5363		631	1.7174	1.4836	2.8362		631	2.5569	2.8212	2.7478		631	2.9395	2.864	3.2235		631	2.5396	2.727	2.8657
632	2.3115	2.485	2.4209		632	1.6172	1.9804	2.8268		632	2.5675	2.8509	2.612		632	2.9653	2.7512	3.2401		632	2.5223	2.687	3.0105
633	2.3266	2.3085	2.4243		633	1.9234	1.9677	2.7824		633	2.5573	2.7656	2.5953		633	2.933	2.8551	3.1191		633	2.6062	2.6584	2.9789
634	2.5602	2.8671	2.5432		634	1.6418	1.8037	2.7877		634	2.6167	2.8303	2.6958		634	2.9857	2.8463	3.1663		634	2.5328	2.7852	2.8722
635	2.6222	2.8952	2.4688		635	1.6533	1.9753	2.8235		635	2.6008	2.8707	2.4798		635	3.0592	2.7433	3.1529		635	2.5304	2.7664	2.954
636	2.5689	2.7981	2.6629		636	1.4945	1.7078	2.6903		636	2.4984	2.7214	2.491		636	2.9738	2.8598	3.1134		636	2.4773	2.7476	2.9089
637	2.6128	2.5537	2.7914		637	1.6227	1.6915	2.697		637	2.4961	2.7171	2.5059		637	2.9356	2.928	3.1584		637	2.3773	2.6274	2.9372
638	2.5221	2.8719	2.7648		638	1.4908	1.7007	2.8766		638	2.5927	2.7311	2.3791		638	2.8579	2.8534	3.1707		638	2.3631	2.6903	2.9359
639	2.5361	2.7993	2.7239		639	1.6357	1.6409	2.6863		639	2.6889	2.8083	2.4645		639	3.0007	2.8649	3.163		639	2.4613	2.6565	3.0033
640	2.2264	2.5739	2.5189		640	1.5861	2.0409	2.7069		640	2.3208	2.8735	2.5417		640	2.8908	3.0511	3.1628		640	2.3933	2.6374	3.0075
641	2.794	2.5883	2.5842		641	1.6119	2.0386	2.7308		641	2.4414	2.8629	2.387		641	2.8681	3.2175	3.1871		641	2.4938	2.6322	2.9704
642	2.4925	2.4941	2.5974		642	1.5754	1.8108	2.76		642	2.6238	3.022	2.5575		642	2.9385	3.1414	3.2156		642	2.507	2.6875	2.9149
643	2.1645	2.5863	2.6786		643	1.5121	1.795	2.5927		643	2.6053	2.8057	2.4036		643	2.8332	3.0524	3.1661		643	2.4278	2.6602	3.0496
644	2.2019	2.6732	2.3986		644	1.6269	1.9845	2.7474		644	2.5578	2.927	2.5078		644	2.8015	3.1098	3.2693		644	2.3561	2.6747	3.1276
645	2.2387	2.584	2.5101		645	1.8041	1.9087	2.7126		645	2.5547	2.8137	2.3617		645	2.9056	3.0694	3.1046		645	2.2646	2.5989	2.9295
646	2.1464	2.6661	2.7399		646	1.6057	1.7941	2.7021		646	2.3008	2.7255	2.496		646	3.2236	3.1967	2.9943		646	2.3616	2.6764	3.0432
647	2.3505	2.8922	2.3255		647	1.7861	1.9374	2.7337		647	2.2667	2.9014	2.5046		647	3.078	3.1468	3.0055		647	2.4009	2.594	2.9151
648	2.6596	2.7049	2.5404		648	1.7207	1.9533	2.7283		648	2.2872	2.9175	2.3781		648	3.12	3.1338	2.9502		648	2.3488	2.5661	2.821
649	2.8455	3.033	2.4998		649	1.7491	1.9803	2.7121		649	2.2536	3.0189	2.4951		649	3.0211	3.2375	3.0151		649	2.2989	2.6346	3.0327
650	2.8248	2.9921	2.493		650	1.7489	1.9915	2.6868		650	2.2612	2.834	2.5134		650	2.8972	3.1365	3.0277		650	2.389	2.588	3.0012
651	2.9207	2.9662	2.2354		651	1.7456	1.9681	2.6809		651	2.2835	2.7958	2.4082		651	2.8529	3.1131	3.2276		651	2.4485	2.6253	3.0483
652	2.7577	2.9019	2.4438		652	1.6745	2.0024	2.7943		652	2.4703	2.8081	2.4034		652	2.8935	2.9962	2.8357		652	2.4986	2.6102	3.0581
653	2.2228	2.6858	2.5691		653	1.6192	1.9794	2.7304		653	2.4195	2.6798	2.4986		653	3.0652	2.854	3.056		653	2.3345	2.6055	2.9982
654	2.2136	2.6368	2.3182		654	1.5194	1.8878	2.6217		654	2.2882	2.6812	2.5081		654	3.1601	3.4247	2.8623		654	2.4812	2.5807	3.0015
655	2.0568	2.6459	2.7037		655	1.5351	1.7916	2.8115		655	2.1272	2.8167	2.4816		655	2.9134	3.0754	2.9112		655	2.4447	2.6053	3.0363
656	2.3944	2.515	2.6504		656	1.6883	1.9487	2.8674		656	2.4517	2.7708	2.5115		656	3.0704	2.7755	3.1477		656	2.4041	2.7595	3.0362
657	2.22	2.4789	2.6273		657	1.7603	1.9801	2.6937		657	2.3742	2.6027	2.5804		657	2.9591	2.9024	3.0346		657	2.3924	2.8717	3.0588
658	2.3991	2.4028	2.6866		658	1.691	1.895	2.5749		658	2.4081	2.5955	2.4693		658	3.0102	2.7947	3.0211		658	2.3193	2.8201	2.8966
659	2.3162	2.6403	2.7099		659	1.6876	1.5147	2.6726		659	2.3682	2.5951	2.3647		659	3.1001	2.9311	3.0035		659	2.2886	2.7158	2.9094
660	2.1139	2.6406	2.714		660	1.6595	1.3105	2.6197		660	2.337	2.6347	2.5153		660	3.1654	2.7494	3.1561		660	2.3185	2.657	2.9661
661	2.2471	2.8209	2.4017		661	1.7087	1.8098	2.7599		661	2.2653	2.7272	2.539		661	3.0005	2.8536	2.9943		661	2.4277	2.7362	2.9563
662	2.3449	3.0062	2.4881		662	1.6426	1.4217	2.7385		662	2.314	2.6071	2.5896		662	3.0607	2.8773	3.0164		662	2.3069	2.7579	2.8798
663	2.4468	2.9609	2.4284		663	1.7634	1.692	2.7345		663	2.4709	2.7214	2.6327		663	2.9009	2.9468	3.0896		663	2.3905	2.7768	2.935
664	2.5017	2.6983	2.6185		664	1.5607	1.7493	2.6194		664	2.4105	2.5872	2.4168		664	2.9077	2.9031	3.0703		664	2.3259	2.7896	2.8912
665	2.4657	2.7214	2.6978		665	1.7043	1.5174	2.7133		665	2.3719	2.7034	2.5578		665	2.9265	2.8589	2.9594		665	2.243	2.7443	2.9169
666	2.7286	2.6	2.734		666	1.6644	1.7073	2.7752		666	2.3636	2.7834	2.4527		666	2.8006	3.1045	2.8128		666	2.1674	2.6505	2.8806
667	2.6821	2.7073	2.9361		667	2.0389	1.5734	2.7831		667	2.4967	2.6945	2.4698		667	2.9598	2.9398	2.9251		667	2.293	2.7223	2.9162
668	2.8052	2.6089	2.3791		668	1.8033	1.8793	2.6825		668	2.6131	2.6852	2.495		668	2.9684	2.7706	3.0225		668	2.3876	2.6396	2.8641
669	2.964	2.8203	2.8409		669	1.928	1.7665	2.7343		669	2.4068	2.6415	2.606		669	2.8502	2.9494	2.8981		669	2.3249	2.7131	2.8927
670	2.7022	2.621	2.9007		670	1.9166	2.0293	2.791		670	2.6312	2.5275	2.5545		670	2.8429	2.7527	3.1793		670	2.3913	2.6728	2.9427
671	2.8587	2.4251	2.5717		671	1.7569	1.6669	2.7346		671	2.4726	2.6318	2.6463		671	2.8535	2.9599	2.9488		671	2.2977	2.633	2.9897
672	2.6458	2.6529	2.4079		672	1.8238	1.6586	2.6687		672	2.489	2.5746	2.7064		672	2.9232	2.7763	2.8981		672	2.2972	2.6679	3.0418
673	2.95	2.4352	2.2953		673	1.5917	1.7372	2.6889		673	2.3029	2.7523	2.4459		673	3.0167	2.7459	2.7867		673	2.3533	2.6552	2.8742
674	2.6919	2.811	2.5781		674	1.7473	1.6894	2.7806		674	2.4794	2.3983	2.5202		674	2.9504	2.8937	2.9806		674	2.3931	2.6165	2.9126
675	2.7395	2.6475	2.6882		675	1.695	1.7334	2.6918		675	2.4678	2.535	2.4641		675	3.1056	2.9185	2.983		675	2.3247	2.6072	2.8737
676	2.9792	2.582	2.4732		676	1.7656	1.8115	2.8189		676	2.6644	2.4566	2.6553		676	2.9448	2.9237	2.8139		676	2.3323	2.629	2.8598
677	2.809	2.865	2.5255		677	1.7596	1.8032	2.713		677	2.602	2.5843	2.5227		677	3.0196	2.9614	2.7395		677	2.4034	2.7258	2.8718
678	2.2634	2.8572	2.4985		678	1.673	1.8993	2.729		678	2.3509	2.6061	2.7251		678	3.034	2.7847	2.6945		678	2.1904	2.7524	2.9545
679	2.2898	2.7005	2.6921		679	1.6504	1.8363	2.6552		679	2.3866	2.5119	2.7903		679	2.9858	2.7749	2.9163		679	2.2743	2.7121	2.9568
680	2.5511	2.8485	2.5685		680	1.5693	1.8339	2.6215		680	2.37	2.5769	2.7715		680	3.0975	2.7601	2.8177		680	2.1678	2.7343	2.8924
681	2.3524	2.7045	2.5589		681	1.6306	1.841	2.8845		681	2.4213	2.5741	2.718		681	3.029	2.7977	2.707		681	2.1213	2.6671	3.0154
682	2.6453	2.7244	2.6605		682	1.9118	1.9364	2.7497		682	2.5241	2.5006	2.7424		682	2.8838	2.972	2.8636		682	2.1856	2.7326	3.0046
683	2.9066	2.9543	2.439		683	1.9647	1.8429	2.7675		683	2.7194	2.5231	2.7307		683	2.9171	2.8508	2.8439		683	2.2588	2.6604	2.9416
684	3.0328	2.7665	2.421		684	1.7579	1.8543	2.6982		684	2.572	2.5996	2.7457		684	2.9739	2.869	2.9966		684	2.2861	2.6615	2.9337
685	3.0595	2.6322	2.5293		685	1.716	1.8208	2.598		685	2.3626	2.351	2.7655		685	2.8991	2.8471	2.7584		685	2.3886	2.5972	2.9462
686	3.0493	2.7433	2.2485		686	1.858	1.8779	2.576		686	2.4278	2.4498	2.7938		686	3.1314	2.9522	2.7799		686	2.2096	2.6104	2.8887
687	2.8251	2.5817	2.2651		687	1.7814	1.9461	2.5647		687	2.4274	2.5819	2.6949		687	2.9142	2.781	3.0481		687	2.3787	2.5935	2.9478
688	2.2801	2.6481	2.5693		688	1.9092	1.9049	2.6524		688	2.3453	2.4027	2.8325		688	2.9627	2.8139	2.7697		688	2.2982	2.5873	2.9583
689	2.3739	2.5767	2.796		689	1.7286	1.9714	2.7207		689	2.3696	2.2486	2.8432		689	2.9803	2.8578	2.8327		689	2.3547	2.6897	3.0041
690	2.4203	2.576	2.6771		690	1.7421	2.0293	2.6506		690	2.3412	2.3876	2.8747		690	2.9953	2.8265	2.5149		690	2.3145	2.6386	2.9843
691	2.4742	2.2255	2.6166		691	1.7925	1.8259	2.6702		691	2.2468	2.4165	2.935		691	2.9566	2.8747	2.8928		691	2.2806	2.6986	2.9379
692	2.3195	2.2809	2.7062		692	1.8489	1.8094	2.6273		692	2.2796	2.336	2.8331		692	2.9835	2.9712	2.6777		692	2.1774	2.6675	3.1093
693	2.7424	2.1025	2.4013		693	1.8116	1.9001	2.6624		693	2.2821	2.5836	2.7786		693	3.0137	2.9054	2.525		693	2.2543	2.7246	2.9823
694	2.5333	2.252	2.8908		694	1.8287	1.7627	2.7055		694	2.3243	2.6826	2.9336		694	3.0272	2.7524	2.6525		694	2.2974	2.7636	3.1047
695	2.9201	2.3118	2.5909		695	2.0026	1.783	2.64		695	2.4255	2.7872	2.8125		695	2.9568	2.8343	2.9656		695	2.4226	2.7353	3.1114
696	2.8129	2.3657	2.6557		696	1.8113	1.9197	2.7251		696	2.6326	2.5708	2.8036		696	2.9883	2.978	3.0069		696	2.4308	2.6301	3.0054
697	2.6586	2.4505	2.6146		697	1.8452	1.9139	2.7625		697	2.6934	2.4322	2.8683		697	3.0813	2.853	2.9408		697	2.2468	2.6874	3.0126
698	2.9175	2.5429	2.4107		698	1.8562	1.8102	2.6388		698	2.6159	2.6025	2.6397		698	3.0227	2.9384	3.1182		698	2.3207	2.6971	3.0364
699	2.9639	2.5606	2.8381		699	1.8414	1.8467	2.7113		699	2.2247	2.817	2.6601		699	3.0774	2.8319	3.0203		699	2.3238	2.6174	2.9823
700	3.1236	2.2703	2.8299		700	1.8649	1.8523	2.6706		700	2.3814	2.6741	2.6284		700	2.9815	2.765	3.0599		700	2.3049	2.6746	2.9025
701	3.0524	2.9536	2.8066		701	1.7721	1.8828	2.6994		701	2.4626	2.6079	2.7566		701	3.05	2.8744	3.0874		701	2.2733	2.6794	2.9309
702	2.7164	2.5368	2.7665		702	1.8061	1.9257	2.679		702	2.7265	2.7817	2.6613		702	3.0141	2.7548	2.671		702	2.4021	2.7205	2.9723
703	2.4696	2.7622	2.835		703	1.7394	1.9135	2.6448		703	2.6429	2.9412	2.6223		703	3.0168	2.7434	2.6831		703	2.3742	2.7798	2.9376
704	2.9263	2.933	2.5879		704	1.8292	1.8308	2.632		704	2.4188	2.8676	2.712		704	2.9555	2.9695	3.0316		704	2.411	2.7707	2.8593
705	2.8081	2.858	2.4372		705	1.7006	1.8871	2.6608		705	2.4233	2.9566	2.6576		705	2.8975	3.1415	2.8355		705	2.2341	2.7929	2.8153
706	2.7131	2.6973	2.5402		706	1.9811	1.956	2.6751		706	2.2226	2.9623	2.6532		706	2.8165	2.8707	2.9855		706	2.2981	2.6845	2.8391
707	2.56	2.6029	2.6191		707	1.8511	1.9341	2.6571		707	2.2731	3.0296	2.5966		707	2.8075	2.8279	2.8021		707	2.1714	2.8076	2.9032
708	2.0967	2.4838	2.712		708	1.9262	1.7676	2.6625		708	2.4589	2.7834	2.634		708	2.8509	2.8537	2.8044		708	2.2873	2.72	2.9008
709	2.348	2.7135	2.4883		709	1.9595	1.8001	2.6239		709	2.329	2.6872	2.5687		709	2.742	2.9066	2.8806		709	2.3624	2.6717	2.9342
710	2.5445	2.4844	2.7296		710	1.8823	1.9173	2.6514		710	2.4194	2.6026	2.756		710	2.8856	2.9019	2.789		710	2.3323	2.843	3.0913
711	2.8183	2.7902	2.7341		711	1.802	1.9619	2.6717		711	2.4898	2.5823	2.7342		711	2.9959	2.9945	2.8934		711	2.2592	2.7565	3.0937
712	2.2323	2.6164	2.5349		712	1.9	2.0363	2.6947		712	2.5697	2.6028	2.7534		712	3.0611	3.0643	2.8509		712	2.2919	2.7099	3.0928
713	2.2506	2.5582	2.4905		713	1.6725	1.8818	2.6679		713	2.3223	2.7279	2.848		713	3.0609	3.0366	2.8636		713	2.2532	2.7206	3.096
714	2.6104	2.5224	2.3033		714	1.8719	1.7341	2.7007		714	2.5002	2.9163	2.8628		714	3.0314	3.0648	2.8006		714	2.2653	2.7703	3.0805
715	2.6015	2.6637	2.6182		715	1.8193	1.7634	2.7403		715	2.4078	2.9388	2.742		715	2.9946	2.8977	2.7842		715	2.1938	2.6565	3.1399
716	2.5992	2.3609	2.6401		716	2.0119	1.7637	2.7691		716	2.4611	2.9567	2.7341		716	2.9849	2.7847	2.9009		716	2.2389	2.6835	3.016
717	2.2523	2.5802	2.5343		717	1.8669	1.7615	2.6369		717	2.3263	2.8534	2.6909		717	3.0284	2.9178	2.9042		717	2.1807	2.7253	2.9867
718	2.5466	2.5317	2.5647		718	1.7878	1.6238	2.5734		718	2.5358	2.6772	2.6993		718	3.0637	3.062	3.1275		718	2.3091	2.6616	3.0445
719	2.6857	2.5933	2.5749		719	1.8574	1.9955	2.5949		719	2.6564	3.0322	2.5362		719	2.9931	3.0144	2.7894		719	2.4366	2.8344	2.8819
720	2.2398	2.5938	2.7666		720	1.7939	1.947	2.561		720	2.3626	2.8026	2.6881		720	2.9582	2.8853	2.8217		720	2.4615	2.7155	2.8595
721	2.7175	2.6333	2.7191		721	1.7539	1.9895	2.5242		721	2.6775	2.8224	2.7896		721	2.9353	2.9424	2.973		721	2.4454	2.6835	2.9109
722	2.6903	2.6033	2.314		722	1.83	1.8466	2.5927		722	2.6444	2.7465	2.8898		722	2.9341	2.9574	2.8372		722	2.475	2.7198	2.7712
723	2.796	3.1907	2.5558		723	1.9332	1.9765	2.5309		723	2.6598	2.7799	2.8917		723	2.8596	2.7634	2.9081		723	2.4347	2.7318	2.9746
724	2.7869	2.8133	2.4291		724	1.9576	1.8088	2.6143		724	2.6542	2.8336	2.6248		724	2.8185	2.9083	2.8834		724	2.3779	2.6845	2.9024
725	2.7853	3.068	2.6655		725	1.7253	1.9452	2.671		725	2.5563	2.845	2.769		725	2.7884	2.8973	3.0203		725	2.378	2.6881	2.8385
726	2.8139	2.6606	2.5625		726	1.6602	1.8946	2.5404		726	2.4997	2.7293	2.7921		726	2.7541	2.8639	2.9248		726	2.2532	2.6347	2.7971
727	2.5894	2.9983	2.5235		727	1.6952	1.7457	2.6279		727	2.5294	2.7531	2.8853		727	2.8675	2.9829	2.8018		727	2.229	2.7953	2.7832
728	2.5297	3.1631	2.6244		728	1.6894	1.7461	2.662		728	2.6308	2.8169	2.7292		728	2.9397	2.9402	2.7778		728	2.252	2.8192	2.8099
729	2.3673	3.0521	2.5706		729	1.6912	1.8714	2.6053		729	2.5322	2.7541	2.5813		729	2.8339	2.9426	2.9259		729	2.3126	2.696	2.7269
730	2.475	2.9468	2.8555		730	1.7855	1.8585	2.6127		730	2.4888	2.6917	2.8461		730	3.0304	2.9578	3.0475		730	2.2163	2.8158	2.721
731	2.4292	2.7625	2.6261		731	1.6918	1.9779	2.7324		731	2.5633	2.7729	2.4887		731	2.8612	2.9861	3.0282		731	2.1645	2.7057	2.8514
732	2.3957	2.7202	2.6223		732	1.6693	2.0361	2.5481		732	2.5276	2.6631	2.6515		732	2.8264	2.9139	2.9734		732	2.2858	2.6839	2.8944
733	2.4821	2.7732	2.6937		733	1.6683	2.016	2.7174		733	2.5834	2.7842	2.606		733	2.8623	2.8759	2.9515		733	2.3701	2.7209	2.9457
734	2.4368	2.3928	2.762		734	1.6959	1.8881	2.556		734	2.49	2.9845	2.5774		734	2.9963	3.041	2.8318		734	2.2976	2.7237	2.9069
735	2.424	2.4121	2.7919		735	1.7647	1.9241	2.7191		735	2.5662	2.8463	2.6446		735	2.8862	3.0045	3.0236		735	2.2838	2.6194	2.9142
736	2.2418	2.4286	2.7999		736	1.7085	1.8215	2.6015		736	2.576	2.7309	2.6479		736	2.9779	2.9606	2.8686		736	2.4206	2.6993	2.9697
737	2.5789	2.3874	2.86		737	1.6954	1.6243	2.6173		737	2.4478	2.7329	2.4655		737	3.021	2.9531	2.876		737	2.3034	2.6626	3.0174
738	2.2823	2.3414	2.5347		738	1.6755	1.8626	2.6421		738	2.39	2.7255	2.6099		738	2.8659	2.7827	3.1477		738	2.31	2.6132	3.0206
739	2.4311	2.4138	2.5444		739	1.7318	1.8802	2.6535		739	2.4534	2.7302	2.5815		739	2.9416	2.97	3.1886		739	2.276	2.7618	2.9969
740	2.4912	2.454	2.4742		740	1.6259	1.6851	2.6631		740	2.3369	2.8202	2.5252		740	2.9874	2.9033	3.0823		740	2.2476	2.6713	2.9779
741	2.5104	2.7073	2.4539		741	1.8091	1.8798	2.6248		741	2.4171	2.7893	2.7095		741	2.8761	2.9312	3.087		741	2.3001	2.6162	2.9941
742	2.6692	2.6952	2.4407		742	1.7469	1.8496	2.6396		742	2.4209	2.779	2.6523		742	2.9628	2.9395	3.1032		742	2.3553	2.6691	2.9667
743	2.7089	2.5752	2.6598		743	1.7146	1.7822	2.6315		743	2.5598	2.8482	2.6153		743	2.9278	2.9187	3.1036		743	2.3071	2.7034	3.0393
744	2.6754	2.5742	2.6452		744	1.997	1.9403	2.6523		744	2.4115	3.065	2.6915		744	2.906	2.9513	2.8123		744	2.2589	2.6615	2.818
745	2.6006	2.5374	2.4964		745	1.742	1.9297	2.7144		745	2.4448	2.9422	2.6889		745	2.9266	2.8753	2.8881		745	2.3786	2.6554	2.9306
746	2.3583	2.5359	2.3612		746	1.9214	1.8367	2.604		746	2.522	2.9037	2.472		746	2.8619	2.9503	2.8272		746	2.1644	2.7289	2.8878
747	2.4946	2.5917	2.4221		747	1.7825	1.8339	2.6534		747	2.4617	2.7904	2.6897		747	2.9538	2.8428	2.8848		747	2.2105	2.6416	2.8452
748	2.6106	2.6659	2.4555		748	1.6355	1.911	2.7015		748	2.4028	2.6114	2.5692		748	2.8328	2.7936	2.7167		748	2.2342	2.6167	2.9982
749	2.4118	2.5729	2.5268		749	1.7508	1.8896	2.6584		749	2.3578	2.6064	2.7228		749	2.8891	2.8334	2.9574		749	2.2577	2.6675	3.029
750	2.4625	2.6406	2.4146		750	1.6582	1.8878	2.6372		750	2.6629	2.6494	2.6354		750	2.8678	2.892	2.8112		750	2.1887	2.7371	2.9675
751	2.3564	2.5247	2.5689		751	1.692	1.9523	2.6655		751	2.6063	2.6261	2.7203		751	2.9021	2.9357	2.8652		751	2.5216	2.6229	2.9502
752	2.5683	2.4798	2.4685		752	1.7294	1.9013	2.6967		752	2.5826	2.9711	2.7793		752	3.0396	2.828	2.8457		752	2.3256	2.7636	3.0134
753	2.6666	2.5317	2.4548		753	1.6195	1.9097	2.8001		753	2.4122	2.7794	2.8125		753	3.0069	2.8034	2.9693		753	2.1066	2.6858	3.0104
754	2.4501	2.5347	2.5325		754	1.7303	1.8598	2.7429		754	2.5316	2.9336	2.8323		754	2.9169	2.9303	2.9154		754	2.3253	2.5383	2.9364
755	2.4254	2.6973	2.813		755	1.7221	1.8422	2.7395		755	2.5395	2.837	2.8575		755	2.8814	3.0231	2.8711		755	2.2839	2.6581	2.9804
756	2.399	2.6112	2.4392		756	1.6505	1.7614	2.7688		756	2.3999	2.7604	2.8211		756	2.8219	3.005	2.9898		756	2.1101	2.5797	3.0662
757	2.5319	2.4915	2.2626		757	1.6443	1.6287	2.66		757	2.4782	2.8351	2.6877		757	2.8476	2.9753	2.8619		757	2.2643	2.5191	3.0594
758	2.3926	2.6176	2.1982		758	1.6374	1.9028	2.8068		758	2.35	2.7432	2.8555		758	2.9983	2.8196	2.9886		758	2.2135	2.6094	2.7681
759	2.3894	2.683	2.3052		759	1.7368	1.8987	2.7179		759	2.4513	2.9066	2.807		759	2.8813	2.8403	2.9251		759	2.2189	2.6956	2.8365
760	2.2952	2.6223	2.3951		760	1.5588	1.9625	2.7385		760	2.4138	2.791	2.7758		760	2.9695	2.8273	2.9581		760	2.3407	2.6884	2.9184
761	2.3251	2.5878	2.4117		761	1.7271	1.8762	2.7612		761	2.4204	2.8123	2.5806		761	2.8721	2.8207	2.9443		761	2.2093	2.6882	2.9101
762	2.4231	2.5908	2.3277		762	1.5974	1.9556	2.7859		762	2.3628	2.8183	2.6347		762	3.0135	2.8492	2.9715		762	2.3344	2.5847	3.0987
763	2.382	2.7356	2.3681		763	1.6318	1.7482	2.7078		763	2.4956	2.8331	2.6513		763	2.9835	2.7457	2.9502		763	2.3261	2.8023	2.8332
764	2.4224	2.8558	2.3785		764	1.5685	1.8741	2.7322		764	2.3863	2.6401	2.6739		764	2.9963	2.9431	3.0699		764	2.2683	2.7425	2.858
765	2.2921	2.5873	2.4916		765	1.5251	1.855	2.5884		765	2.5847	2.6359	2.6208		765	2.9399	2.9761	2.7173		765	2.2992	2.6962	2.8617
766	2.3532	2.8062	2.5566		766	1.6407	1.9813	2.742		766	2.5422	2.6593	2.6947		766	2.9559	2.9912	2.9637		766	2.3063	2.7673	2.9172
767	2.3275	2.6107	2.2461		767	1.66	1.7442	2.6494		767	2.35	2.6468	2.683		767	2.878	2.9234	2.8197		767	2.3248	2.611	2.9271
768	2.2539	2.8594	2.4042		768	1.5593	2.0525	2.6746		768	2.5762	2.8082	2.597		768	3.0859	2.9725	2.7999		768	2.3127	2.6475	3.0798
769	2.4092	2.4407	2.9218		769	1.7567	1.9562	2.6782		769	2.4144	2.6382	2.6369		769	2.9094	2.9039	2.928		769	2.2945	2.6682	2.837
770	2.2118	2.5827	2.4372		770	1.6773	1.8824	2.691		770	2.4272	2.7026	2.7163		770	2.9894	2.9185	2.9206		770	2.2823	2.7067	2.8377
771	2.2098	2.667	2.3323		771	1.7354	1.9133	2.652		771	2.4288	2.6843	2.4984		771	2.8292	3.0172	2.8151		771	2.2526	2.7516	2.9895
772	2.4056	2.807	2.1461		772	1.3968	1.9208	2.6423		772	2.4728	2.7526	2.6728		772	2.7748	2.9372	2.8187		772	2.2453	2.699	2.8237
773	2.4184	2.9089	2.373		773	1.4976	1.9059	2.6899		773	2.507	2.6881	2.9118		773	2.795	2.9219	2.7763		773	2.2264	2.5924	2.9434
774	2.418	2.5112	2.3644		774	1.7562	1.8784	2.6746		774	2.7009	2.7217	2.8003		774	2.8674	2.8443	2.9227		774	2.3145	2.631	2.9923
775	2.1214	2.4279	2.3132		775	1.665	2.0008	2.6759		775	2.4747	2.7739	2.7886		775	2.8081	2.9348	2.8255		775	2.2508	2.7987	3.048
776	2.027	2.5489	2.2346		776	1.7573	1.8745	2.7278		776	2.51	2.6918	2.8602		776	2.9016	2.9531	3.0373		776	2.2747	2.8137	3.1355
777	2.2059	2.7606	2.5064		777	1.6178	1.9561	2.664		777	2.6513	2.6329	2.8271		777	2.7579	3.0235	2.8455		777	2.328	2.8668	2.9724
778	2.2468	2.7856	2.7653		778	1.508	2.0093	2.7377		778	2.6776	2.7685	2.8862		778	2.9868	3.1078	2.8639		778	2.4125	2.9439	2.9549
779	2.0935	2.6063	2.8519		779	1.5857	1.9071	2.5897		779	2.6284	2.7843	2.8562		779	2.8899	3.113	2.8627		779	2.4291	2.9615	3.025
780	2.3847	2.5238	2.6631		780	1.7347	1.8239	2.739		780	2.7494	2.7268	2.8816		780	2.7568	2.9902	2.8064		780	2.4413	2.8888	2.9518
781	2.7556	2.6478	2.7826		781	1.7656	1.9691	2.7618		781	2.7969	2.782	2.6693		781	3.0762	2.9587	3.1617		781	2.3491	2.932	2.9015
782	2.5852	2.6805	2.9165		782	1.7032	1.871	2.7349		782	2.7377	2.8489	2.6643		782	2.8361	2.8924	2.913		782	2.3119	2.8177	2.9082
783	2.7995	2.7639	2.7697		783	1.7977	1.9326	2.7263		783	2.7634	2.7947	2.6344		783	2.928	2.9289	2.9335		783	2.2576	2.8921	2.9268
784	2.8322	2.4331	2.818		784	1.7482	1.9495	2.6921		784	2.5122	2.7925	2.7492		784	2.9424	3.0742	2.9214		784	2.2945	2.7235	3.0143
785	2.6955	2.5207	2.8374		785	1.7079	2.0048	2.7724		785	2.5459	2.9349	2.8018		785	3.1043	2.9451	2.9456		785	2.2413	2.7465	2.8265
786	2.6704	2.8061	2.6222		786	1.7578	1.9759	2.7329		786	2.5307	2.6938	2.7662		786	2.9472	2.8964	2.7908		786	2.3031	2.8005	2.9199
787	2.6147	3.0428	2.8011		787	1.8778	1.9193	2.6897		787	2.5313	2.7087	2.8601		787	2.7991	2.9185	2.9047		787	2.251	2.9751	3.0631
788	2.5783	2.5438	2.5722		788	1.9161	1.8669	2.6591		788	2.5648	2.6365	2.9701		788	2.8724	2.9028	2.8459		788	2.2952	2.983	2.9524
789	2.7392	3.0404	2.6138		789	1.7123	2.0301	2.7369		789	2.4229	2.7079	2.8044		789	2.91	2.9472	2.9289		789	2.3549	2.7166	2.8816
790	2.6128	2.9299	2.6333		790	1.8988	1.9102	2.7983		790	2.3453	2.8145	2.842		790	2.8634	2.9825	2.8413		790	2.4441	2.8387	3.066
791	2.7306	2.7053	2.7242		791	2.3644	2.1448	2.7419		791	2.4011	2.8704	2.8623		791	2.8856	2.9078	2.9817		791	2.4119	2.8537	3.0998
792	2.4609	2.6859	2.5679		792	1.9601	1.9878	2.711		792	2.6436	2.7876	2.815		792	2.9593	2.9157	2.9518		792	2.5113	2.8155	2.9939
793	2.6349	2.9437	2.7443		793	1.8502	1.8938	2.7607		793	2.5645	2.6736	2.8657		793	2.8604	2.8904	2.9039		793	2.4726	2.7949	3.1835
794	2.8128	2.2561	2.9044		794	2.2962	1.9235	2.759		794	2.6608	2.7434	2.7292		794	2.8537	2.932	2.9997		794	2.3349	2.8022	2.955
795	2.6174	2.4834	2.9428		795	1.6163	1.9561	2.8488		795	2.4172	2.7389	2.6552		795	2.8762	2.9553	2.8765		795	2.49	2.9338	2.9823
796	2.6787	3.0371	2.7911		796	1.7618	1.8592	2.8095		796	2.694	2.8311	2.7187		796	2.9207	2.7651	2.9395		796	2.3807	2.8463	3.0543
797	2.8644	3.2353	2.898		797	1.5547	2.0075	2.7805		797	2.6742	2.8548	2.7444		797	2.8194	2.8605	2.8642		797	2.3847	2.7299	3.0418
798	2.9178	3.2876	2.8183		798	1.6146	1.8603	2.8085		798	2.4469	2.8556	2.7368		798	2.902	2.9158	3.0936		798	2.2958	2.7893	3.0949
799	2.6728	2.8025	2.8712		799	1.588	1.9865	2.81		799	2.6046	2.9127	2.9207		799	2.979	2.8502	3.0876		799	2.2515	2.8036	3.0702
800	2.7701	2.7953	2.8414		800	1.5919	1.9464	2.7482		800	2.4658	2.8749	2.7138		800	2.9771	2.8434	3.137		800	2.2751	2.8804	3.0738
801	2.6877	2.6074	2.8676		801	1.6055	1.9604	2.8747		801	2.4946	2.8328	2.6815		801	3.0568	2.9088	3.0987		801	2.3741	3.0117	3.148
802	2.7298	2.8368	2.7213		802	1.7674	1.9875	2.8872		802	2.4356	2.9025	2.6535		802	3.1013	2.725	2.8939		802	2.182	2.9265	2.9507
803	2.7052	2.5943	2.6206		803	1.7103	1.9358	2.7809		803	2.5001	2.9328	2.6915		803	2.8207	2.7884	2.7972		803	2.2993	2.8139	3.0628
804	2.6458	2.4845	2.8178		804	1.7786	1.9237	2.7648		804	2.511	2.9207	2.8668		804	2.9124	2.7558	2.9225		804	2.3009	2.9967	2.9757
805	2.7397	2.7994	2.7521		805	1.6603	1.8987	2.7687		805	2.7051	2.8262	3.008		805	2.7355	2.8213	2.9655		805	2.2911	2.8529	2.9891
806	2.7683	2.9483	2.7595		806	1.732	2.1643	2.8192		806	2.5945	2.8439	2.9466		806	2.8442	2.7934	2.9926		806	2.4157	2.7629	2.9211
807	2.857	3.044	2.7204		807	1.8409	1.9131	2.7466		807	2.8412	2.7377	2.8784		807	2.9938	2.9196	2.8758		807	2.4233	2.8546	2.9039
808	2.6703	2.9886	2.7697		808	1.6116	1.9907	2.619		808	2.7289	2.7468	2.9048		808	2.8482	2.9404	2.9265		808	2.4235	2.8981	3.0427
809	2.7564	3.0743	2.8267		809	1.7729	2.0385	2.6955		809	2.8044	2.7418	2.8496		809	2.8582	2.8183	2.888		809	2.3581	2.7961	2.886
810	2.7532	2.5124	2.7549		810	1.6381	2.0055	2.646		810	2.7222	2.7936	2.8062		810	2.8534	2.8277	2.9774		810	2.2984	2.7546	2.9195
811	2.7359	2.6488	2.7849		811	1.7808	1.9711	2.8062		811	2.6142	2.9137	2.8656		811	2.8703	2.8945	3.0162		811	2.4317	2.8378	2.9105
812	2.6881	2.5009	2.7608		812	1.7147	1.8586	2.7896		812	2.5791	2.9541	2.8989		812	2.8894	2.8521	3.0089		812	2.4031	2.8515	2.9865
813	2.8546	2.3249	2.6752		813	1.7328	1.884	2.8917		813	2.5616	2.9341	2.8932		813	2.8654	2.7825	2.9829		813	2.4728	2.8231	2.9664
814	2.8948	2.5239	2.5248		814	1.6789	1.9069	2.8521		814	2.4544	2.9064	2.9522		814	2.8043	2.8257	2.9557		814	2.3826	2.8978	2.9276
815	2.746	2.6919	2.5867		815	1.6525	1.8375	2.7814		815	2.5158	2.8623	2.9166		815	3.0649	2.871	2.9871		815	2.4274	2.8274	2.9632
816	2.6104	2.5411	2.6524		816	1.7078	1.8108	2.8497		816	2.6412	2.9124	2.8789		816	2.962	2.8002	2.8264		816	2.3933	2.9282	2.9727
817	2.8135	2.5804	2.7745		817	1.586	1.9092	2.7445		817	2.5796	2.8797	2.8118		817	2.8481	3.0242	2.9696		817	2.3707	2.7981	2.918
818	2.7912	2.4991	2.6972		818	1.5035	2.0751	2.8038		818	2.7189	2.8134	2.9253		818	2.8757	2.7574	2.9148		818	2.4178	2.8805	3.0071
819	2.7508	2.6275	2.762		819	1.6254	1.9585	2.704		819	2.5471	2.8324	2.9177		819	2.8216	2.8445	2.9085		819	2.3739	2.9047	3.0437
820	2.7473	2.4322	2.6208		820	1.6919	1.876	2.7228		820	2.5406	2.8711	2.9625		820	2.8713	2.8158	2.8147		820	2.3468	2.8619	2.9546
821	2.6951	2.5513	2.7373		821	1.6219	1.9077	2.7871		821	2.4235	2.7643	2.5703		821	2.8243	2.7094	2.8755		821	2.4798	2.8742	3.0397
822	2.5433	2.4958	2.6751		822	1.8038	2.0094	2.6711		822	2.5334	2.9541	2.6295		822	2.8577	2.8735	2.846		822	2.3687	2.9091	3.0315
823	2.2554	2.5539	2.7237		823	1.5616	1.9366	2.7848		823	2.6089	2.884	2.6382		823	2.8518	2.8581	3.0564		823	2.4883	2.8824	2.9591
824	2.8313	2.7356	2.7314		824	1.5816	1.8953	2.7364		824	2.4995	2.995	2.6887		824	2.9583	2.8766	2.8959		824	2.5184	2.7889	2.8993
825	2.8519	2.715	2.6626		825	1.7843	1.8959	2.834		825	2.5236	2.9456	2.6041		825	2.8217	2.8221	2.9684		825	2.5223	2.7976	2.9697
826	2.7657	2.582	2.6735		826	1.7274	1.9399	2.9352		826	2.4781	2.9128	2.6287		826	2.8416	2.9007	3.0152		826	2.5915	2.9031	3.001
827	2.7887	2.4982	2.6932		827	1.5455	2.0083	2.8831		827	2.4788	2.8915	2.717		827	2.7425	2.8432	2.8077		827	2.478	2.8551	2.9481
828	2.7267	2.628	2.7174		828	1.5778	1.9794	2.8176		828	2.373	3.0823	2.7211		828	2.7159	2.8593	2.9191		828	2.4645	2.9292	2.9029
829	2.7137	2.831	2.6831		829	1.7951	2.0207	2.8521		829	2.4776	2.9712	2.7346		829	2.671	2.8672	2.8709		829	2.4705	2.8602	2.8325
830	2.6362	2.4539	2.8474		830	1.6253	2.0631	2.7685		830	2.3974	3.043	2.7047		830	2.587	2.8039	2.8617		830	2.5068	3.0111	2.8842
831	2.7219	2.6666	2.7011		831	1.5366	1.9121	2.7887		831	2.4175	2.9199	2.6359		831	2.6946	2.7951	2.8572		831	2.4873	2.8726	2.9126
832	2.7823	2.743	2.8095		832	1.4827	1.9667	2.7844		832	2.5317	2.9683	2.4815		832	2.8083	2.8737	2.8078		832	2.5835	2.8625	2.9843
833	2.8723	2.9342	2.6785		833	1.6101	1.9441	2.8026		833	2.4466	2.8413	2.9136		833	2.8568	2.8221	2.9124		833	2.554	2.9038	2.8981
834	2.8569	2.8707	2.8807		834	1.6727	1.9321	2.7758		834	2.4741	2.9808	2.751		834	2.835	2.8144	2.9889		834	2.4765	2.9277	2.9877
835	2.7535	2.7701	2.8028		835	1.569	2.0768	2.7017		835	2.6446	2.9645	2.8042		835	2.8588	2.8368	2.9508		835	2.4192	2.8858	2.995
836	2.7623	2.6203	2.7675		836	1.6528	1.9032	2.7409		836	2.4274	2.9896	2.8633		836	2.8245	2.7086	2.9086		836	2.4768	2.8577	2.967
837	2.7259	2.6324	2.8749		837	1.5322	2.1133	2.7629		837	2.4397	2.8016	2.727		837	2.7884	2.8127	2.9729		837	2.3614	2.8814	2.984
838	2.7077	2.8775	2.7573		838	1.5401	2.066	2.7376		838	2.6567	2.8152	2.7924		838	2.8411	2.7896	3.0103		838	2.4067	2.7632	3.0767
839	2.8662	2.7441	2.8509		839	1.5773	1.9236	2.8019		839	2.6234	2.7627	2.6345		839	2.7671	3.0336	3.1606		839	2.4708	2.8658	2.9297
840	2.8335	2.5306	2.8039		840	1.8314	2.02	2.7237		840	2.7151	2.6393	2.686		840	2.7157	2.835	3.0222		840	2.3541	2.8821	3.0538
841	2.8873	2.7208	2.8737		841	1.6824	2.1381	2.7078		841	2.7177	2.5907	2.7577		841	2.9679	2.7662	3.0585		841	2.4404	2.8429	2.9954
842	2.8956	2.7655	2.7165		842	1.7601	2.1062	2.6272		842	2.719	2.6401	2.5946		842	2.8156	2.9692	2.9978		842	2.4475	2.8696	3.0061
843	2.671	2.4598	2.7988		843	1.7791	2.2458	2.6293		843	2.6456	2.751	2.7021		843	2.9268	3.0533	3.015		843	2.4275	3.0776	3.0554
844	2.7335	2.6407	2.9201		844	1.7457	2.2135	2.7015		844	2.6639	2.6605	2.7789		844	2.9543	2.9634	3.062		844	2.4339	2.8758	2.9263
845	2.6919	2.5455	2.8083		845	1.7683	2.0782	2.7118		845	2.7128	2.6376	2.8084		845	2.7894	3.0729	3.1151		845	2.4078	2.9047	3.0501
846	2.5154	2.7674	2.7803		846	1.7304	1.8643	2.6856		846	2.7946	2.6904	2.7846		846	2.7487	2.869	2.8837		846	2.4245	3.0063	2.9433
847	2.6714	2.9933	2.8181		847	1.8643	1.8782	2.7299		847	2.6225	2.5761	2.5796		847	3.0477	3.0511	3.0495		847	2.5872	2.8988	2.9396
848	2.6367	2.7635	2.7473		848	1.8566	2.1008	2.8443		848	2.5717	2.6151	2.5213		848	2.8237	2.8685	3.0487		848	2.5242	2.9906	3.0388
849	2.8179	2.546	2.844		849	1.8146	1.9649	2.761		849	2.6257	2.6063	2.6865		849	2.7632	3.054	2.95		849	2.4207	2.9987	2.9121
850	2.7478	3.0579	2.7344		850	1.8001	2.0264	2.7948		850	2.6601	2.6436	2.5507		850	2.8218	3.0278	2.7794		850	2.4916	2.8513	2.9188
851	2.5819	2.4884	2.8591		851	1.865	1.9581	2.7984		851	2.5688	2.6403	2.4989		851	3.0058	2.8224	2.9751		851	2.3761	2.8952	3.077
852	2.8101	2.5524	2.5981		852	1.8851	2.0608	2.8366		852	2.562	2.8113	2.6257		852	2.8438	2.9194	3.0732		852	2.47	2.9285	2.9413
853	2.8025	2.6335	2.7611		853	1.7432	1.9405	2.8439		853	2.4113	2.8068	2.6401		853	2.8297	2.9706	3.1066		853	2.3748	2.8601	2.9677
854	2.7371	2.635	2.8918		854	1.6587	1.9557	2.8042		854	2.4418	2.7717	2.7766		854	3.0809	2.9678	2.9757		854	2.4761	2.8381	2.944
855	2.6699	2.6534	2.6809		855	1.7684	2.0055	2.7313		855	2.477	2.8437	2.7038		855	2.9238	3.0559	3.1164		855	2.3948	2.8157	2.9725
856	2.6957	2.6042	2.748		856	1.7944	1.8889	2.7425		856	2.5978	2.8177	2.6708		856	3.0039	2.9734	3.0835		856	2.5173	2.8531	3.0181
857	2.8568	2.5705	2.839		857	1.6613	1.9861	2.6953		857	2.5429	3.1345	2.6021		857	2.9759	2.9323	2.9312		857	2.501	2.8812	2.9984
858	2.7654	2.7667	2.7429		858	1.6832	1.9463	2.7903		858	2.4464	2.9535	2.6875		858	3.1471	2.8018	2.8004		858	2.4664	2.9033	2.9315
859	2.7131	2.6603	2.7266		859	1.5841	1.9652	2.7129		859	2.5716	3.0091	2.648		859	2.9911	2.8214	2.9612		859	2.4988	2.9191	2.9783
860	2.7624	2.426	2.7563		860	1.5654	1.9553	2.6921		860	2.4338	2.956	2.612		860	2.799	2.9663	3.1148		860	2.5084	2.9409	3.006
861	2.7793	2.3157	2.5367		861	1.4786	2.0166	2.7097		861	2.3579	3.0037	2.6713		861	2.8967	3.0502	3.0364		861	2.5706	2.9613	2.9592
862	2.8545	2.5872	2.8827		862	1.6404	1.9431	2.7466		862	2.5255	3.0267	2.6897		862	2.9448	3.0587	3.0589		862	2.5043	2.8822	2.9429
863	2.8326	2.5686	2.8878		863	1.6725	1.9459	2.7354		863	2.6398	2.9851	2.6082		863	3.007	2.9147	3.2091		863	2.5848	2.8723	2.9568
864	2.8801	2.2	2.8347		864	1.6605	1.9552	2.7545		864	2.4809	2.8599	2.5752		864	2.9052	2.628	3.0068		864	2.6593	2.9624	2.8546
865	2.708	2.4283	2.8453		865	1.7228	2.0862	2.8248		865	2.6013	2.8965	2.5876		865	2.8204	2.7757	3.0229		865	2.5853	2.9265	2.9099
866	2.3708	2.6273	2.8648		866	1.7403	2.2171	2.7859		866	2.6367	2.9926	2.6808		866	2.9108	2.7957	2.9255		866	2.5296	2.9221	2.8809
867	2.7679	2.4839	2.8748		867	1.7142	1.9965	2.6658		867	2.4582	2.7638	2.6238		867	2.7364	2.6967	2.8219		867	2.6068	3.0669	2.8902
868	2.4561	2.6107	2.8319		868	1.8049	2.0063	2.7872		868	2.4573	3.071	2.6477		868	2.7164	2.7292	2.9298		868	2.6039	2.9936	2.8788
869	2.7435	2.8242	2.7344		869	1.7231	2.0562	2.6312		869	2.4845	2.8988	2.5472		869	2.7964	2.8315	2.8886		869	2.5789	2.9987	2.9723
870	2.8719	2.7008	2.6933		870	1.7075	1.9499	2.7369		870	2.4404	3.0519	2.5963		870	2.8409	2.946	3.0036		870	2.5154	2.9414	2.8615
871	2.8696	2.6823	2.7774		871	1.7143	2.0331	2.6768		871	2.4631	2.8023	2.705		871	2.6178	2.8219	2.8597		871	2.4869	2.9959	2.8317
872	2.8054	2.7178	2.83		872	1.7728	1.9506	2.7994		872	2.4192	2.7883	2.6443		872	2.7007	2.6669	2.9778		872	2.4228	2.8909	2.857
873	2.6918	2.6813	2.8924		873	1.8119	1.9799	2.717		873	2.5679	3.1451	2.5503		873	2.8569	2.7454	2.9343		873	2.4512	3.0152	2.9457
874	2.8156	2.8174	2.7102		874	1.8495	1.9285	2.6394		874	2.3233	2.9234	2.7519		874	2.6648	2.7552	2.8649		874	2.4319	2.9519	2.834
875	2.76	2.7918	2.8049		875	1.8091	1.9306	2.6694		875	2.3332	3.03	2.6843		875	2.766	2.7418	2.8445		875	2.6012	2.9926	2.894
876	2.9614	2.8832	2.7769		876	1.8239	1.9142	2.6799		876	2.46	2.9205	2.7871		876	2.8707	2.6789	2.935		876	2.5174	2.8841	2.9878
877	2.8552	2.8065	2.7255		877	1.8736	1.9285	2.8392		877	2.5158	2.936	2.666		877	3.0335	2.8121	2.7854		877	2.5832	2.9396	2.9043
878	2.7881	2.7508	2.7078		878	1.7503	1.9878	2.7379		878	2.4721	2.7136	2.6607		878	3	2.6674	2.873		878	2.5895	2.958	2.876
879	2.6456	2.8262	2.7149		879	1.8867	1.9644	2.7255		879	2.5756	2.7272	2.6192		879	2.9185	2.7165	2.8297		879	2.5145	2.9746	2.8319
880	2.6878	2.73	2.7797		880	2.039	1.9048	2.6733		880	2.618	2.9624	2.5536		880	2.8507	2.912	2.9763		880	2.5492	2.9179	2.9313
881	2.6705	2.7366	2.7765		881	2.0094	1.9426	2.6521		881	2.5158	2.909	2.5524		881	2.9303	2.8577	2.9133		881	2.4853	3.0348	2.9137
882	2.753	2.7137	2.7518		882	1.9212	1.8527	2.6044		882	2.4989	2.9248	2.5696		882	2.7837	2.9969	2.8739		882	2.4932	2.9768	2.935
883	2.8038	2.9047	2.8052		883	1.9229	1.8814	2.7176		883	2.6273	2.9622	2.7933		883	2.8797	2.7643	2.8355		883	2.3104	3.0437	3.0438
884	2.6982	2.8286	2.6682		884	1.7999	1.9135	2.7357		884	2.6427	2.9627	2.7819		884	2.8209	2.7673	2.9496		884	2.4115	2.9399	2.9352
885	2.8327	2.7571	2.7537		885	1.8443	1.9543	2.7484		885	2.591	3.049	2.7431		885	2.9108	2.6968	3.024		885	2.3591	2.8775	2.9925
886	2.7612	2.8965	2.8193		886	1.9012	1.9712	2.6996		886	2.7077	2.9049	2.6391		886	2.7625	2.6949	2.8587		886	2.2868	2.8165	3.1462
887	2.8295	2.9285	2.7789		887	1.94	2.0038	2.7738		887	2.5699	3.0021	2.9059		887	2.6701	2.6251	3.118		887	2.2612	2.8819	2.8657
888	2.7776	2.8411	2.7578		888	1.976	1.9847	2.6713		888	2.6107	2.9158	2.8423		888	2.7506	2.636	3.103		888	2.3087	2.8943	2.9209
889	2.6938	2.8668	2.8384		889	1.9676	1.9979	2.762		889	2.7387	3.0513	2.8293		889	2.7566	2.6459	3.0636		889	2.2552	2.8512	3.1024
890	2.7294	2.8592	2.7211		890	1.8829	1.9879	2.6453		890	2.61	3.0551	2.7924		890	2.8164	2.6396	3.0514		890	2.3529	2.9486	3.0377
891	2.5684	2.7235	2.7224		891	1.9369	2.14	2.6997		891	2.7088	3.0643	3.0797		891	2.7146	2.5984	2.9173		891	2.4759	2.786	2.8413
892	2.8305	2.8498	2.6872		892	1.8557	1.9515	2.7019		892	2.6146	2.9991	2.9653		892	2.7054	2.5936	2.8765		892	2.425	2.8604	3.0244
893	2.82	2.7866	2.7917		893	1.8657	1.9449	2.6332		893	2.5502	2.9527	2.9257		893	2.6996	2.6404	2.9637		893	2.4348	3.0145	2.9168
894	2.68	2.8512	2.6218		894	1.7815	1.9731	2.7358		894	2.6	2.978	2.8872		894	2.7803	2.7039	2.8354		894	2.2937	2.9128	2.8454
895	2.7313	2.7534	2.8132		895	2.0696	2.0268	2.7466		895	2.505	3.1133	2.8387		895	2.6507	2.9185	2.7888		895	2.4397	2.9385	2.8849
896	2.7798	2.5232	2.7907		896	1.9273	2.0065	2.7313		896	2.6641	3.0986	2.9645		896	2.5346	2.861	2.8974		896	2.3362	2.9844	2.7831
897	2.719	2.4592	2.8164		897	1.8598	2.0035	2.6623		897	2.6822	3.1188	2.848		897	2.509	2.8567	2.9987		897	2.3219	2.9455	2.9372
898	2.8323	2.396	2.8737		898	1.8421	2.1245	2.7806		898	2.6339	3.0838	2.9228		898	2.6679	2.9479	2.9512		898	2.3845	2.9672	2.7865
899	2.7448	2.5688	2.7537		899	1.8692	1.8655	2.7223		899	2.6589	3.1332	3.108		899	2.6472	2.8644	2.8327		899	2.4908	3.0414	2.8813
900	2.9509	2.4355	2.6821		900	1.7744	1.9851	2.6829		900	2.5819	2.9953	2.9878		900	2.4999	2.9856	2.8688		900	2.3738	2.9457	2.8363
901	2.6157	2.549	2.7658		901	1.8322	1.9239	2.5783		901	2.6356	3.1241	2.9879		901	2.6965	2.7885	3.0333		901	2.4358	2.8667	2.9738
902	2.844	2.3973	2.7625		902	1.9554	1.9903	2.6901		902	2.5461	3.1579	2.9747		902	2.6643	2.7725	2.825		902	2.4252	2.8367	2.8191
903	2.7486	2.3954	2.9737		903	1.947	2.1913	2.7649		903	2.6091	2.9965	2.9838		903	2.6743	2.6611	2.7209		903	2.3935	2.9054	2.9157
904	2.7851	2.6402	2.7078		904	1.9088	2.0882	2.6706		904	2.469	3.0877	2.9237		904	2.5359	2.8942	2.779		904	2.5219	2.8646	2.8469
905	2.8025	2.7513	2.8003		905	1.9106	2.1867	2.772		905	2.488	3.0541	2.8796		905	2.6887	2.7203	2.7838		905	2.435	2.9094	2.8237
906	2.7738	2.851	2.7709		906	1.901	2.0098	2.7073		906	2.528	3.0538	2.9044		906	2.5223	2.7295	2.7328		906	2.5153	2.8462	2.9038
907	2.5295	2.8466	2.807		907	1.9167	2.0883	2.771		907	2.6626	2.9114	2.607		907	2.6752	2.6448	2.6552		907	2.4461	3.0011	2.8545
908	2.5404	2.7994	2.814		908	1.8405	2.0675	2.7838		908	2.5616	2.9037	2.6638		908	2.7439	2.6939	2.7956		908	2.4685	2.9215	2.8877
909	2.3072	2.8983	2.8039		909	2.0064	2.0548	2.71		909	2.6907	2.8448	2.8019		909	2.5686	2.5602	2.796		909	2.3062	2.8233	2.8332
910	2.6812	3.097	2.8293		910	2.119	1.9885	2.6952		910	2.6904	2.9812	2.5686		910	2.5335	2.6529	2.7943		910	2.579	2.8036	2.8429
911	2.642	3.1376	2.7959		911	2.0735	2.0703	2.7958		911	2.5349	2.9417	2.6114		911	2.6511	2.7225	2.7124		911	2.406	2.7886	2.8454
912	2.8005	3.1526	2.8917		912	1.9075	2.104	2.6521		912	2.6879	2.8104	2.5992		912	2.6198	2.6616	2.8456		912	2.5055	2.8992	2.9031
913	2.6502	3.0137	2.71		913	1.9854	2.058	2.6868		913	2.6207	2.7989	2.5793		913	2.6965	2.7314	2.7337		913	2.5208	2.8839	2.9182
914	2.7699	2.8089	2.8053		914	1.9124	2.0681	2.7326		914	2.6384	2.6511	2.4635		914	2.4888	2.7599	2.7883		914	2.6139	2.9002	3.0549
915	2.713	3.0361	2.7864		915	1.9042	2.0572	2.7725		915	2.7974	2.5998	2.6368		915	2.4673	2.7867	2.8694		915	2.4972	2.8532	2.9209
916	2.7106	2.7638	2.7674		916	2.0226	1.8964	2.6778		916	2.8384	2.9403	2.6037		916	2.6196	2.7109	2.8741		916	2.4884	2.8267	2.9671
917	2.8658	2.8101	2.7335		917	1.8036	1.9994	2.6908		917	2.4874	2.8334	2.7614		917	2.5751	2.8988	2.8189		917	2.4055	2.9193	2.9212
918	2.8491	2.9048	2.7769		918	1.9632	2.0239	2.6213		918	2.7069	2.8396	2.4327		918	2.6851	2.7551	3.2206		918	2.3594	2.8378	2.835
919	2.6644	2.705	2.8547		919	2.0024	2.1055	2.6424		919	2.5366	2.9586	2.6915		919	2.6925	2.694	2.9198		919	2.2102	2.8349	2.9315
920	2.9372	2.7705	2.7543		920	1.8821	2.0423	2.7153		920	2.6397	2.7972	2.6435		920	2.9373	2.8507	2.726		920	2.3156	2.8246	2.9082
921	2.8541	2.9503	2.7884		921	1.9844	2.0477	2.8111		921	2.5419	2.5808	2.6306		921	2.7984	2.9519	2.822		921	2.3084	2.9225	2.905
922	2.6722	2.5651	2.678		922	1.9158	2.0501	2.9014		922	2.5057	2.709	2.5148		922	2.8162	2.8076	2.7405		922	2.327	2.7745	2.9533
923	2.7312	2.9216	2.719		923	1.8776	2.052	2.7118		923	2.5157	2.6549	2.5953		923	2.7656	3.0691	2.9081		923	2.5437	3.0159	2.8764
924	2.8362	2.899	2.76		924	1.9568	1.9835	2.8097		924	2.732	2.7604	2.6701		924	2.7863	2.9604	2.8054		924	2.483	2.9981	2.9817
925	2.7534	2.7359	2.7374		925	2.0195	2.0932	2.6946		925	2.7008	2.6662	2.5149		925	2.8244	2.8946	2.9931		925	2.3552	2.9283	2.8947
926	2.5576	2.895	2.7827		926	1.974	2.065	2.7202		926	2.7621	2.6306	2.4737		926	2.5889	3.0539	2.9394		926	2.3585	2.865	3.057
927	2.5965	2.8159	2.6844		927	2.134	2.0053	2.8079		927	2.6707	2.8163	2.41		927	3.0758	3.0041	2.8076		927	2.4745	2.887	2.9437
928	2.4835	2.8225	2.6009		928	1.9015	1.9404	2.6744		928	2.7042	2.7713	2.5592		928	3.0075	2.8269	3.0959		928	2.3907	2.861	2.8947
929	2.4924	2.8937	2.631		929	1.9086	2.1222	2.7016		929	2.6508	2.7469	2.4698		929	2.9898	2.6541	2.9752		929	2.4017	3.0263	2.8478
930	2.6807	2.8861	2.6561		930	2.0403	2.0213	2.7188		930	2.5137	2.8011	2.5231		930	2.8255	2.8216	3.1381		930	2.4961	3.0298	2.8815
931	2.5725	2.8586	2.7704		931	1.8796	1.9078	2.7631		931	2.4191	2.9509	2.5636		931	2.7815	2.8165	3.1044		931	2.3921	3.0064	2.9476
932	2.3725	2.7989	2.7307		932	1.9445	2.0092	2.6431		932	2.4018	2.88	2.6818		932	2.7125	2.7436	3.1757		932	2.398	2.9402	2.9703
933	2.3684	2.9099	2.3448		933	2.0287	1.9259	2.7397		933	2.2604	2.7907	2.8393		933	2.8225	2.8038	3.1049		933	2.3846	3.0233	2.8868
934	2.3859	2.929	2.6061		934	1.9605	1.9883	2.7591		934	2.4738	2.7697	2.7644		934	3.0484	2.8198	3.0574		934	2.3929	3.0312	2.8201
935	2.4134	2.3995	2.4896		935	2.0486	1.965	2.6037		935	2.5626	2.6382	2.7678		935	2.7537	2.9182	3.0996		935	2.3825	2.9364	2.9176
936	2.3546	2.3005	2.5432		936	2.2159	1.8665	2.6397		936	2.3754	2.5736	2.774		936	2.8314	2.9806	2.9794		936	2.2319	3.0202	3.0106
937	2.6602	2.4097	2.6372		937	2.4721	2.0006	2.729		937	2.4904	2.6351	2.7774		937	2.7483	3.0695	3.0438		937	2.3698	3.0804	2.9541
938	2.4763	2.4642	2.5658		938	2.3754	1.941	2.6876		938	2.5866	2.7389	2.8538		938	2.7552	2.8575	2.8992		938	2.4406	3.0448	3.0478
939	2.5793	2.6746	2.5935		939	2.9282	2.0065	2.7153		939	2.5809	2.6724	2.7715		939	2.6599	2.8537	3.0394		939	2.4158	2.9124	2.9856
940	2.4967	2.52	2.6227		940	2.8283	1.9055	2.7737		940	2.6237	2.7812	2.9716		940	2.7799	3.0923	3.1137		940	2.4191	2.829	3.0321
941	2.3708	2.6183	2.6281		941	2.7128	1.9321	2.6289		941	2.5738	2.7404	2.7352		941	2.701	2.8495	2.9499		941	2.4913	2.8483	3.0509
942	2.2955	2.8331	2.6657		942	2.7287	2.0159	2.6682		942	2.5913	2.8488	2.8607		942	2.8886	2.8905	3.0157		942	2.3672	2.9949	3.0242
943	2.1928	2.5403	2.6977		943	2.6629	1.9625	2.8385		943	2.2324	2.7756	2.8072		943	2.7887	2.8248	2.7987		943	2.4169	2.9591	2.9768
944	2.1774	2.6048	2.6059		944	2.6098	2.1373	2.704		944	2.2356	2.7291	2.9975		944	2.7051	2.7733	2.7801		944	2.45	3.0277	2.9069
945	2.4729	2.6259	2.601		945	2.5934	1.957	2.7866		945	2.5137	2.8114	2.9806		945	2.6848	3.1611	2.8545		945	2.3956	2.88	2.8875
946	2.4245	2.5026	2.5606		946	2.4165	1.9629	2.7716		946	2.5641	2.6302	2.9253		946	2.6777	2.7895	2.9165		946	2.559	2.8442	3.0246
947	2.397	2.3982	2.5211		947	2.4766	2.0398	2.6597		947	2.6094	2.618	2.9763		947	2.756	2.8411	2.8541		947	2.3911	2.9723	3.0941
948	2.4136	2.791	2.5835		948	2.4892	1.9317	2.5586		948	2.4506	2.7086	2.9169		948	2.6233	2.8547	2.7705		948	2.3922	2.8975	3.1318
949	2.5032	2.5883	2.5535		949	2.0898	2.0337	2.7543		949	2.5242	2.8161	2.9319		949	2.6861	2.958	2.7344		949	2.3699	2.9088	3.0458
950	2.5111	2.3354	2.6247		950	1.962	2.131	2.8775		950	2.3332	2.8292	2.7145		950	2.7245	2.9359	2.8286		950	2.4403	2.9546	3.145
951	2.3119	2.4448	2.5105		951	2.2307	2.0838	2.6789		951	2.3511	2.8112	2.7463		951	2.7792	3.0786	2.9522		951	2.2899	2.9635	2.9839
952	2.3837	2.548	2.5384		952	2.3876	1.954	2.7025		952	2.5018	2.8677	2.8364		952	2.7061	2.7577	2.9262		952	2.348	2.917	3.0233
953	2.3863	2.2263	2.6457		953	2.6636	1.919	2.7815		953	2.361	2.8989	2.8473		953	2.8566	2.8582	3.0157		953	2.2582	2.8935	3.0079
954	2.1561	2.4429	2.5565		954	2.2805	2.257	2.6387		954	2.3178	2.8615	2.8918		954	2.656	2.887	2.9279		954	2.3906	2.7718	2.9423
955	2.1652	2.7312	2.4974		955	2.5536	2.1868	2.6805		955	2.4672	2.8122	2.635		955	2.7778	2.9974	3.0259		955	2.2327	2.9598	2.833
956	2.419	2.7232	2.4656		956	2.694	2.021	2.788		956	2.3717	2.778	2.4589		956	2.6793	2.6897	2.9895		956	2.3201	2.8286	2.9772
957	2.4161	2.7419	2.6432		957	2.4622	2.2283	2.7404		957	2.5259	2.5908	2.6295		957	2.8563	2.6996	3.1294		957	2.1581	2.8989	2.8009
958	2.4332	2.7985	2.7086		958	2.6894	1.9833	2.7001		958	2.5441	2.791	2.7206		958	2.7708	2.6942	2.9723		958	2.2818	2.9963	2.9474
959	2.8321	2.546	2.7522		959	2.504	2.0448	2.6446		959	2.4862	2.8269	2.6873		959	2.6956	2.6405	3.1043		959	2.211	2.925	3.0602
960	2.6787	2.5534	2.7077		960	2.5722	2.0933	2.6463		960	2.499	3.0395	2.9663		960	2.7938	2.7143	3.1533		960	2.2391	2.9237	2.9681
961	2.2878	2.8052	2.5802		961	2.0544	2.1686	2.6237		961	2.6532	3.0769	3.1553		961	2.7364	2.6482	2.947		961	2.3725	3.1138	3.0115
962	2.2684	2.48	2.6439		962	1.9979	2.0648	2.73		962	2.8704	3.1198	3.1182		962	2.9245	2.5883	3.0199		962	2.4077	2.9196	2.9805
963	2.3745	2.7058	2.7242		963	1.9659	2.1261	2.7851		963	2.547	2.9146	3.1355		963	2.8207	2.879	3.0159		963	2.3895	2.9481	2.9576
964	2.2239	2.3822	2.6651		964	1.795	2.0054	3.0008		964	2.4755	3.0884	2.9397		964	2.6545	2.7763	2.9928		964	2.4693	2.9036	2.8745
965	2.6843	2.1912	2.6485		965	2.0238	2.0713	2.8372		965	2.477	2.9556	2.8786		965	2.6603	2.798	3.0714		965	2.3763	2.9657	2.983
966	2.8236	2.6122	2.5184		966	2.2756	1.8888	2.683		966	2.4306	3.0108	3.0158		966	2.7968	2.9967	3.0175		966	2.4617	2.9397	3.1662
967	2.7783	2.5163	2.5101		967	2.0704	1.9783	2.7448		967	2.5728	2.9269	3.0904		967	2.8513	2.9146	3.0074		967	2.5544	3.0282	3.1513
968	2.8344	2.5429	2.422		968	2.2064	1.9566	2.7588		968	2.555	2.8855	3.0991		968	2.804	2.8057	3.0054		968	2.5759	3.1224	2.9384
969	2.7475	2.6624	2.5415		969	2.1849	1.9337	2.8161		969	2.2686	2.9323	3.0692		969	2.6123	2.9713	3.1301		969	2.3965	2.9173	3.1653
970	2.7771	2.5959	2.5352		970	2.5897	2.014	2.8534		970	2.6648	3.0062	3.1396		970	2.8523	2.9827	3.0367		970	2.506	2.916	3.0576
971	2.8523	2.7743	2.4663		971	2.7898	1.8798	2.7268		971	2.6914	2.9258	3.0119		971	2.7509	2.9074	3.1432		971	2.5505	2.878	3.1001
972	2.8651	2.7978	2.5838		972	2.6867	1.7991	2.8024		972	2.4576	3.1162	3.1053		972	2.8613	2.9836	3.116		972	2.5159	2.8994	3.0172
973	2.5223	2.7585	2.4629		973	2.5102	2.1308	2.7532		973	2.497	2.9959	3.0399		973	2.8487	3.1068	3.2001		973	2.475	2.8437	2.9844
974	2.6494	2.4832	2.6049		974	2.5721	1.9724	2.6857		974	2.6583	3.0879	3.2292		974	2.9089	2.9946	3.1322		974	2.5281	2.9961	2.9983
975	2.6849	2.3963	2.5587		975	2.6556	2.1206	2.8328		975	2.5088	2.7341	3.1005		975	2.7876	3.0628	3.0128		975	2.4392	2.8002	3.0686
976	2.6391	2.2854	2.5852		976	2.7438	2.0833	2.7399		976	2.4697	2.9208	3.0673		976	2.9691	3.013	3.2373		976	2.4809	2.9638	3.0787
977	2.6174	2.4036	2.7864		977	2.7661	1.9472	2.6952		977	2.5397	2.7209	3.1278		977	2.8769	3.1136	2.9795		977	2.451	2.9011	3.0778
978	2.8494	2.4856	2.7245		978	2.6692	1.8907	2.6921		978	2.5101	2.8764	3.057		978	3.0438	3.0979	3.1763		978	2.4094	2.8081	3.0448
979	2.8926	2.3488	2.7046		979	2.6688	1.6251	2.6626		979	2.5387	2.82	3.1305		979	3.1058	3.0365	2.96		979	2.2899	2.7746	3.0105
980	2.6991	2.3028	2.75		980	2.6175	2.0253	2.7199		980	2.7548	2.8043	3.0199		980	3.0147	3.2345	2.9956		980	2.2864	2.998	2.9562
981	2.6476	2.1931	2.7462		981	2.5821	2.0509	2.6886		981	2.4184	2.7947	2.8477		981	3.0453	3.0902	3.1736		981	2.1625	2.8124	2.9979
982	2.9827	2.3003	2.7112		982	2.6917	1.7976	2.759		982	2.4568	2.9642	3.0689		982	3.1393	3.1902	3.1349		982	2.1715	2.8841	3.0045
983	2.7492	2.4325	2.7199		983	2.6372	1.669	2.7351		983	2.4325	2.9411	2.9123		983	3.1357	3.1063	3.0346		983	2.189	2.8933	3.016
984	2.6274	2.1733	2.6726		984	2.7857	2.1655	2.7769		984	2.4152	2.9511	2.89		984	3.0387	3.2102	2.9474		984	2.2228	2.8697	3.0506
985	2.2251	2.0651	2.6007		985	2.6642	1.8112	2.8062		985	2.3641	2.9163	2.8857		985	3.1041	3.1543	2.9676		985	2.2233	2.9111	2.9524
986	2.443	2.1158	2.7244		986	2.5874	1.7008	2.6319		986	2.3367	2.6869	3.0988		986	3.11	3.0461	2.9394		986	2.2713	2.9638	2.9812
987	2.4041	2.3357	2.6489		987	2.6988	2.0382	2.7556		987	2.3081	2.8052	3.1093		987	3.1956	3.1495	2.969		987	2.3187	2.775	2.944
988	2.5392	2.1491	2.6474		988	2.5958	1.9504	2.7055		988	2.566	2.7331	3.0153		988	3.111	3.0237	3.0051		988	2.3475	2.8094	2.9767
989	2.455	2.0388	2.7524		989	2.5542	1.8773	2.6901		989	2.5612	2.7027	3.1072		989	3.0286	3.0496	3.22		989	2.4596	3.0478	2.9462
990	2.5476	2.1253	2.8553		990	2.735	1.9272	2.7571		990	2.4426	2.6662	2.8746		990	3.0029	3.2579	3.1146		990	2.4516	2.9775	3.0933
991	2.4675	2.0181	2.7107		991	2.3363	1.9954	2.84		991	2.3041	2.6696	2.9782		991	3.0872	3.1317	3.0574		991	2.4257	2.9244	2.9597
992	2.371	2.1761	2.6531		992	2.4716	2.0129	2.7904		992	2.4262	2.6557	2.8754		992	3.1178	3.0742	2.7682		992	2.4423	2.8978	2.9883
993	2.7378	2.1691	2.756		993	2.6793	1.9801	2.8105		993	2.3693	2.6419	2.819		993	3.1443	3.2469	2.924		993	2.4557	2.983	2.998
994	2.6003	2.1788	2.7479		994	2.4672	1.8034	2.6997		994	2.4557	2.7549	2.9299		994	3.0417	3.2304	2.9097		994	2.3595	2.9634	2.9717
995	2.3624	2.1641	2.9124		995	2.8197	1.875	2.692		995	2.4958	2.7997	3.0481		995	2.9405	3.0306	2.8855		995	2.2718	2.9217	2.9417
996	2.5382	2.398	2.8749		996	2.7672	1.9186	2.6697		996	2.4354	2.8546	2.807		996	3.1546	3.1171	2.7535		996	2.3316	2.9936	2.9246
997	2.4332	2.315	2.6803		997	2.6548	1.8013	2.7795		997	2.4594	2.6742	2.7035		997	3.0472	3.2058	2.7671		997	2.2836	2.8951	3.043
998	2.5286	2.2485	2.861		998	2.6122	1.6546	2.7098		998	2.5118	2.6688	2.7838		998	2.7866	2.7811	2.6936		998	2.1724	2.9292	3.01
999	2.4461	2.1753	2.6073		999	2.563	1.7602	2.6653		999	2.2159	2.611	2.8338		999	2.8221	2.7999	2.8425		999	2.3218	2.9067	2.9638
1000	2.56	2.6466	2.818		1000	2.7517	1.9017	2.7676		1000	2.3195	2.8427	2.7879		1000	2.8307	2.8671	2.8176		1000	2.3644	2.9436	2.874

## Sheet: Fig4
	dex-bound system				AZ938-bound system				pred-bound system				cor-bound system				dibC-bound system
#Frame	D590-L+1	D590-L+5		#Frame	D590-L+1	D590-L+5		#Frame	D590-L+1	D590-L+5		#Frame	D590-L+1	D590-L+5		#Frame	D590-L+1	D590-L+5
1	10.1483	9.4453		1	10.106	9.3268		1	10.9618	10.0776		1	10.1759	10.0221		1	10.6849	10.1952
2	10.1749	9.9671		2	9.8962	9.3114		2	10.4585	10.2038		2	10.1176	10.0877		2	11.0558	11.1969
3	9.7932	10.1328		3	10.2465	9.4764		3	10.1218	10.2439		3	11.0606	10.4605		3	10.3754	9.9187
4	10.6498	10.0137		4	9.5577	9.1974		4	10.2117	10.0038		4	10.278	10.2884		4	10.4716	10.0599
5	9.9218	9.6306		5	9.671	9.1049		5	10.7798	10.5151		5	9.9723	9.8024		5	10.4842	9.811
6	10.1369	9.7146		6	10.3128	9.8747		6	10.5729	10.7247		6	9.6942	9.9694		6	10.8486	9.554
7	10.9413	10.2694		7	10.2293	9.2984		7	10.1508	10.0952		7	10.2253	9.8172		7	10.9217	9.6946
8	10.8765	10.423		8	10.2198	9.4967		8	10.2677	10.3076		8	10.4355	10.1524		8	10.6287	9.668
9	10.3337	10.2357		9	10.2605	9.3655		9	9.9142	9.9334		9	10.0559	9.6969		9	11.0224	10.1573
10	9.8903	9.5763		10	9.6152	9.0476		10	10.3521	10.08		10	10.2871	9.972		10	11.0545	9.7229
11	10.0159	9.5332		11	9.8732	9.0594		11	9.9696	10.1726		11	9.6149	9.5331		11	9.959	9.7184
12	10.884	10.1525		12	10.0288	9.3112		12	10.2674	10.0007		12	9.1642	9.5375		12	10.6274	9.7596
13	10.6233	10.0829		13	9.9343	9.4971		13	10.2812	10.1194		13	9.3985	9.733		13	10.1666	9.3007
14	10.446	10.2467		14	10.0697	8.9973		14	10.5567	10.4936		14	9.4256	9.7841		14	10.8252	9.9985
15	10.0716	9.3291		15	9.7725	9.6402		15	9.8942	10.1014		15	9.3724	9.8018		15	10.7336	9.4408
16	10.2994	10.4352		16	10.1079	9.8331		16	10.1617	9.9577		16	8.9778	9.3685		16	10.13	9.4167
17	10.5432	10.1875		17	9.9556	9.1025		17	10.4937	10.351		17	9.1887	9.2538		17	10.2156	9.4267
18	10.5017	9.9775		18	9.9092	9.0335		18	10.0633	10.1717		18	9.4676	9.7524		18	9.8239	9.7494
19	10.1692	10.2325		19	10.117	9.1112		19	10.4339	10.2649		19	9.014	9.4249		19	9.8746	9.6284
20	10.0769	9.4191		20	10.0116	9.2705		20	9.8912	10.0062		20	9.4744	9.5432		20	10.4082	10.3333
21	10.3999	10.0224		21	9.9092	9.542		21	9.9808	9.673		21	9.3872	9.3296		21	9.9265	9.3351
22	9.6863	9.692		22	10.1001	9.6284		22	9.9606	9.935		22	9.0014	9.3825		22	9.7777	9.4541
23	10.1457	10.3386		23	10.0579	9.6173		23	10.2035	10.2103		23	9.5862	9.4209		23	9.7433	9.4988
24	10.2416	9.7853		24	9.914	9.4445		24	9.7348	9.9045		24	9.8108	9.785		24	10.2829	9.9222
25	10.2045	10.3486		25	9.9457	9.319		25	9.6147	10.0881		25	9.5567	9.6051		25	9.1247	8.9424
26	10.806	9.8884		26	10.4974	9.4261		26	9.8763	10.0203		26	9.1669	9.7698		26	9.3252	9.2578
27	10.0399	9.8396		27	10.3521	9.4872		27	9.8775	9.9584		27	9.3232	9.3917		27	9.4203	9.3031
28	10.5181	9.5781		28	9.8713	9.2839		28	10.3723	10.6912		28	9.6243	9.2699		28	9.8385	9.4805
29	10.3865	10.0009		29	10.9263	10.0687		29	9.7179	9.7069		29	9.7438	9.7063		29	9.5732	9.1036
30	10.7904	10.3872		30	10.1243	10.0414		30	10.3176	10.0335		30	9.5617	9.8064		30	9.7852	8.982
31	10.6199	10.3458		31	10.1238	10.1187		31	10.449	10.3151		31	9.6795	9.2499		31	9.6041	9.068
32	10.2988	10.76		32	10.3685	8.8595		32	9.9534	9.929		32	9.6492	9.4085		32	9.4154	8.7082
33	10.5271	10.6399		33	9.9727	9.9436		33	10.4386	10.5711		33	9.1702	9.4007		33	9.5701	9.0148
34	10.2503	10.1955		34	10.0569	9.763		34	10.2357	10.7818		34	9.8816	9.2484		34	10.0532	8.8922
35	9.6333	10.1667		35	10.1817	9.4169		35	9.8528	10.3034		35	9.4072	9.4975		35	9.7061	8.943
36	10.2974	11.0382		36	10.2568	9.9195		36	9.4915	9.4939		36	9.4679	9.1233		36	10.9042	9.6009
37	10.197	10.2538		37	9.8715	9.4163		37	9.5646	9.9138		37	9.6468	9.564		37	10.4498	9.535
38	11.0003	11.3743		38	10.0645	9.6448		38	9.8583	10.2596		38	9.4145	8.9537		38	9.3371	9.2319
39	10.1125	10.1958		39	9.8891	9.2663		39	9.4088	9.6093		39	9.9569	9.5127		39	9.3259	9.4118
40	9.9516	10.0415		40	10.0571	9.4935		40	9.2154	9.416		40	9.4531	9.1413		40	9.6634	9.224
41	10.0841	9.9367		41	10.7349	9.515		41	10.339	10.4063		41	10.246	9.7692		41	9.634	9.1577
42	10.2985	10.3059		42	10.52	9.5043		42	9.4829	9.4549		42	9.4882	9.3421		42	9.9477	9.5151
43	9.9564	9.7115		43	9.9733	9.295		43	10.1572	10.4001		43	9.709	9.5049		43	10.4606	9.8831
44	10.1592	9.5857		44	9.3504	8.7265		44	10.2071	10.7436		44	10.0616	9.4542		44	9.7097	9.0006
45	10.083	10.2832		45	9.9972	8.785		45	9.9338	10.0191		45	9.7411	9.4255		45	9.822	9.3044
46	10.567	10.7888		46	9.6077	8.9527		46	9.717	10.2882		46	10.0023	9.4084		46	9.8256	9.2705
47	10.4757	10.4263		47	9.6273	9.1688		47	9.417	10.1117		47	10.0603	9.4289		47	10.1023	9.7177
48	10.5722	10.3568		48	10.1714	9.3527		48	9.7907	10.2279		48	10.1303	9.5949		48	9.2167	9.0052
49	10.8986	10.2266		49	10.2291	9.3395		49	9.818	10.4134		49	10.1653	9.1868		49	9.6919	9.2116
50	10.5044	10.3982		50	10.2275	9.4982		50	10.2705	10.6005		50	10.2576	9.2799		50	9.6008	9.3953
51	10.2992	10.1153		51	9.4469	8.9109		51	9.3811	10.0231		51	10.0446	9.7454		51	9.7749	9.0954
52	10.1682	10.4901		52	9.666	8.8845		52	9.6206	10.0578		52	9.4543	9.3371		52	9.8488	9.2874
53	10.1741	10.5201		53	9.7554	8.9033		53	9.9378	10.2816		53	9.9233	9.3923		53	9.1812	9.0817
54	10.3739	10.584		54	9.4424	9.1887		54	9.5755	9.7968		54	10.0651	10.2117		54	9.8194	8.9383
55	10.7515	10.5464		55	10.639	9.444		55	10.393	10.3968		55	9.701	9.3962		55	10.0568	9.6325
56	10.7092	10.7497		56	10.134	9.6091		56	10.0275	10.134		56	9.8452	9.3141		56	10.3554	9.5281
57	10.8204	10.4177		57	10.078	8.6225		57	9.3826	9.62		57	10.016	9.3502		57	9.4389	9.4453
58	11.3866	10.8693		58	9.5577	8.8669		58	9.8802	10.0644		58	9.8774	9.2758		58	9.4777	9.317
59	10.3657	10.3559		59	9.5109	9.0171		59	9.8771	10.0264		59	9.6521	9.8345		59	9.4312	9.6898
60	11.0886	10.7932		60	10.2174	8.88		60	10.4897	10.0843		60	10.0902	9.4986		60	10.228	9.6681
61	10.6618	10.7067		61	9.9751	8.7248		61	10.4236	10.5291		61	9.7981	9.5539		61	10.3085	9.4499
62	10.3347	10.4982		62	10.0176	8.9851		62	10.0695	10.5206		62	9.2222	9.0758		62	10.3617	9.4309
63	10.0485	10.0838		63	10.6238	9.3214		63	10.3472	10.1004		63	9.3942	9.4664		63	9.7787	9.1544
64	10.7846	10.3616		64	10.313	9.1893		64	9.7143	10.1752		64	9.9947	9.6439		64	10.169	9.58
65	9.6732	10.4814		65	10.7293	9.5098		65	10.0023	10.2275		65	9.7628	9.4865		65	10.1305	9.4221
66	9.8443	10.5059		66	9.8596	9.1963		66	10.2806	10.3873		66	9.6957	9.9209		66	10.4103	9.3819
67	9.9797	9.8877		67	9.6388	9.2529		67	10.1671	10.3735		67	9.4458	9.6717		67	10.0331	9.3464
68	10.1145	10.0633		68	9.7771	9.0572		68	10.4991	10.1923		68	9.7055	9.3612		68	10.099	9.5742
69	9.9247	9.6025		69	9.8796	9.0279		69	9.5841	9.9253		69	9.7671	9.5499		69	10.2609	9.1789
70	10.0884	9.6394		70	10.2655	9.4677		70	9.9389	10.3057		70	9.7632	9.588		70	9.9549	9.2783
71	10.1292	9.5381		71	10.1024	9.5174		71	10.3533	10.3764		71	9.764	10.1145		71	9.5735	9.3332
72	10.2158	10.0312		72	9.9308	9.1178		72	9.6872	10.0983		72	9.6754	9.7476		72	9.9076	9.6608
73	10.5152	9.691		73	10.1518	9.7163		73	10.3919	10.6526		73	9.9528	9.4834		73	9.6301	9.4071
74	10.4347	9.794		74	10.1821	9.3452		74	9.9038	10.1507		74	9.33	8.462		74	9.3832	9.3464
75	9.7115	9.6567		75	9.6829	9.5874		75	11.4769	10.4659		75	9.4002	8.9195		75	9.6215	8.758
76	9.8617	9.8065		76	10.1951	9.8925		76	10.7135	10.1274		76	9.5582	9.4951		76	10.4789	9.0768
77	10.2163	9.8811		77	10.186	9.3412		77	10.7136	10.3024		77	9.4762	9.4598		77	9.9895	9.0541
78	10.1267	9.2973		78	10.3381	9.2983		78	10.3171	10.2273		78	9.9555	9.3965		78	9.5526	8.8187
79	9.8459	9.8256		79	10.2922	9.3338		79	11.1322	10.3164		79	9.6432	9.2069		79	10.4638	9.3863
80	10.0545	9.6061		80	10.3738	9.9282		80	11.7581	10.6507		80	9.3105	9.272		80	10.3296	9.6807
81	9.7953	9.385		81	10.4398	9.7916		81	10.7629	10.2526		81	8.7929	9.0259		81	9.498	9.2154
82	9.6808	9.135		82	10.1483	9.4945		82	10.9652	10.1131		82	9.6932	9.2861		82	10.2457	9.3229
83	9.9304	9.7474		83	9.9756	9.8695		83	10.9887	10.5708		83	9.2655	9.4614		83	9.7069	9.3106
84	10.0016	9.7316		84	10.4948	9.5294		84	9.881	9.5723		84	9.4343	9.1748		84	10.2395	9.6425
85	10.1996	9.4968		85	10.268	9.2055		85	10.1873	10.1557		85	9.495	9.0566		85	9.4993	9.2637
86	9.8338	9.2952		86	10.1307	9.5577		86	11.7092	10.1909		86	10.309	9.7434		86	9.9	9.6745
87	10.5358	9.8979		87	10.6696	9.5067		87	11.2295	10.3338		87	9.786	9.6785		87	9.9008	9.8862
88	10.6163	9.6423		88	10.4205	9.3955		88	10.737	9.5835		88	9.7515	9.7491		88	9.3077	9.4883
89	9.8498	9.0398		89	10.3334	9.5723		89	11.2905	10.5491		89	9.7074	9.0763		89	9.8549	9.4952
90	10.8975	9.7322		90	10.2671	9.399		90	10.6166	10.1294		90	9.9569	9.4175		90	10.3543	9.8953
91	10.4308	9.5073		91	10.0292	9.5452		91	10.099	9.7874		91	10.1056	9.631		91	9.7792	9.4949
92	9.8174	9.4165		92	10.0868	9.0842		92	10.9192	10.0773		92	9.4584	9.2853		92	9.6608	9.3968
93	9.8052	9.7801		93	9.7487	9.194		93	11.2696	10.0068		93	9.573	9.4643		93	9.4152	9.625
94	10.4519	9.7563		94	10.3684	9.4053		94	11.8978	10.1534		94	9.6381	9.2265		94	9.6328	9.754
95	10.1181	9.4755		95	9.9652	9.1911		95	12.3489	10.6738		95	9.7323	9.5516		95	10.0635	10.1625
96	10.1956	9.6945		96	10.5598	9.7713		96	11.0586	10.1492		96	9.9249	9.7009		96	9.8926	9.7749
97	10.2385	9.6843		97	10.322	9.1079		97	11.42	10.1591		97	9.2915	9.6382		97	10.4586	9.9961
98	9.633	9.0003		98	10.3073	8.8235		98	11.0194	9.8453		98	9.4112	9.824		98	9.656	9.8499
99	10.1781	9.6122		99	10.3625	9.4579		99	11.0817	10.2855		99	9.7931	9.7291		99	9.847	9.3604
100	10.3993	10.2001		100	10.4934	9.3785		100	11.5032	9.726		100	9.5199	9.4189		100	9.7159	9.371
101	9.9761	9.478		101	10.3803	9.4817		101	10.7644	9.7381		101	9.4265	9.7693		101	10.8101	10.2059
102	10.0725	9.6861		102	10.3804	9.344		102	10.7689	9.8776		102	10.0052	9.843		102	10.5204	10.1054
103	9.81	9.5006		103	10.208	9.3863		103	10.4899	10.0547		103	9.7877	9.486		103	9.7063	9.5925
104	10.397	9.8662		104	10.3111	9.2312		104	9.75	9.6694		104	9.3887	9.278		104	9.9432	9.6362
105	10.3377	9.6998		105	10.0072	8.8913		105	11.0094	10.4887		105	9.587	10.0901		105	9.7112	9.133
106	10.0021	9.8536		106	10.4689	9.5376		106	10.158	9.6057		106	10.2193	9.8374		106	10.1511	9.5688
107	10.0019	10.3299		107	10.2685	9.5086		107	10.2184	9.8877		107	10.1936	9.7645		107	9.9048	9.461
108	10.2242	10.0061		108	10.0556	9.3841		108	10.7135	10.5262		108	9.5381	9.5274		108	10.3417	9.9587
109	10.6196	10.1179		109	10.4103	9.7886		109	10.9476	10.173		109	10.1225	9.508		109	9.7303	9.8619
110	10.8548	10.874		110	10.4765	9.7223		110	10.3147	10.1022		110	9.0926	9.3282		110	10.0787	10.0249
111	10.6573	9.9312		111	10.1526	9.8169		111	10.381	9.748		111	9.7611	9.7154		111	9.9865	9.7577
112	10.5889	10.1081		112	10.014	9.358		112	10.3414	10.1989		112	9.9265	9.4422		112	9.9354	9.6928
113	9.7619	9.4442		113	10.106	9.7224		113	10.2467	9.8915		113	10.035	9.7664		113	9.7373	9.9483
114	9.824	9.7854		114	10.1979	9.5637		114	10.9765	10.8109		114	9.6877	9.618		114	9.9733	9.8302
115	9.6089	9.3705		115	9.899	9.2406		115	10.4409	10.4735		115	10.0136	9.5902		115	10.5121	9.5837
116	10.1622	9.7694		116	10.5633	9.6001		116	10.4938	10.2407		116	9.9681	9.7988		116	9.7311	9.2625
117	9.9738	9.661		117	10.5043	9.7446		117	10.3189	10.1307		117	9.3915	9.735		117	10.0745	9.7022
118	9.8916	9.7635		118	10.3267	9.6279		118	9.2372	9.6933		118	10.0079	9.6293		118	9.4194	9.6397
119	9.6946	9.5431		119	9.9285	9.4823		119	10.5149	9.8728		119	9.872	9.7354		119	10.1142	9.6566
120	10.2438	9.5593		120	10.1657	9.7606		120	10.7862	10.322		120	10.0756	9.8089		120	9.5759	8.6709
121	11.2564	10.0458		121	9.9228	9.3328		121	10.3747	10.3094		121	10.3215	9.9281		121	10.269	9.8497
122	10.3119	9.7144		122	10.2132	9.6109		122	10.3419	9.8859		122	10.2876	9.809		122	10.0082	9.7584
123	9.7441	9.5201		123	9.8003	9.5483		123	11.0138	10.3942		123	9.899	9.6331		123	9.4347	9.1383
124	10.2324	9.6397		124	9.8117	9.1372		124	10.3899	10.0621		124	9.5327	9.4749		124	9.737	9.4077
125	9.9103	9.5849		125	10.1999	9.1565		125	10.1629	9.6193		125	9.6756	9.2158		125	9.2616	9.3014
126	10.2799	9.2998		126	9.9985	9.3798		126	10.289	9.9681		126	9.7417	9.2567		126	10.2831	9.6051
127	10.3767	9.7063		127	10.3647	9.7217		127	10.2203	9.3851		127	9.9504	9.7391		127	8.8338	8.5365
128	9.6264	9.3968		128	9.8702	9.665		128	10.4254	10.2262		128	10.0197	9.4485		128	9.1574	9.2705
129	9.986	9.8469		129	9.779	9.4032		129	10.4654	10.2559		129	9.4183	9.8183		129	9.294	9.0026
130	10.2226	9.5999		130	9.9829	9.8306		130	10.756	9.966		130	9.7771	9.9588		130	9.907	9.4629
131	10.2021	9.8563		131	10.2356	9.3941		131	10.507	9.9073		131	9.568	9.2264		131	9.3818	9.1458
132	10.1494	9.6043		132	10.0439	9.7876		132	10.0371	9.668		132	10.0018	9.64		132	9.2174	9.1626
133	10.0876	9.8741		133	10.1441	9.091		133	10.153	9.4		133	9.4049	9.6453		133	9.3164	9.1138
134	10.4623	10.0219		134	9.639	8.6997		134	10.7145	10.3545		134	10.2366	10.1096		134	8.9998	8.7505
135	10.1763	9.8992		135	10.2369	9.6219		135	10.1773	9.7921		135	9.9713	9.3287		135	9.6069	9.5378
136	10.3764	9.116		136	10.1118	9.703		136	10.0567	10.3697		136	9.6973	9.1184		136	9.4554	8.9136
137	10.2995	9.5114		137	10.8746	9.0165		137	9.9998	9.6321		137	9.7881	9.5847		137	9.7923	9.4563
138	10.3546	9.6817		138	10.3862	9.6397		138	10.6877	9.8035		138	9.6644	9.548		138	9.902	9.3231
139	10.2167	9.6524		139	10.2234	9.4156		139	10.0888	9.8465		139	9.9312	9.6609		139	9.5081	9.3384
140	9.9618	9.3284		140	9.9349	9.3218		140	9.8123	9.4801		140	9.9711	9.6219		140	8.9935	8.982
141	9.885	9.921		141	10.3176	9.4219		141	9.6899	9.8314		141	10.0119	9.7432		141	9.123	8.809
142	10.0773	9.6359		142	10.3889	9.1153		142	10.061	9.6948		142	9.7769	9.2093		142	9.0808	8.8521
143	10.3019	9.6323		143	10.0566	9.9425		143	9.9324	9.3872		143	9.3653	9.2874		143	9.4917	8.8975
144	10.3606	9.5584		144	9.6902	9.0831		144	9.4433	9.4163		144	10.0139	9.832		144	9.4454	9.352
145	10.6695	9.834		145	10.1902	9.576		145	9.3304	9.458		145	10.3218	9.7151		145	9.2782	9.1758
146	10.1591	9.3231		146	10.2104	9.4699		146	9.6089	9.9985		146	10.2318	9.6264		146	9.9268	9.2033
147	10.4952	9.5277		147	10.3735	8.9342		147	10.1729	10.0597		147	9.6801	9.2121		147	10.3172	9.3912
148	10.8697	9.4691		148	10.1685	9.6179		148	9.4602	9.7759		148	9.0041	9.6483		148	9.6018	9.2726
149	10.3753	9.2804		149	10.1044	9.5328		149	9.741	9.8031		149	9.2598	9.6776		149	9.5806	9.1386
150	11.0285	9.6985		150	9.4415	9.2039		150	9.8254	10.025		150	10.5622	9.7921		150	9.7189	8.7992
151	10.8235	9.4511		151	10.6921	9.4595		151	9.5132	9.8154		151	10.7233	10.2233		151	9.4031	9.1425
152	10.0097	8.8808		152	10.2594	9.3457		152	9.7594	9.7119		152	10.2368	10.2771		152	8.9587	9.1011
153	10.441	9.3197		153	9.9907	9.5468		153	10.4909	9.5083		153	9.1252	9.1829		153	9.8362	9.5058
154	10.7152	9.4186		154	10.3565	9.4325		154	9.5279	9.7988		154	10.0537	9.606		154	9.212	8.9421
155	10.0582	9.4592		155	10.2311	9.2065		155	9.6942	9.5759		155	9.7751	9.5544		155	9.3053	8.8489
156	10.2572	9.5378		156	10.2631	9.181		156	9.3669	9.7795		156	9.791	9.4085		156	9.2475	9.4542
157	10.1895	9.2316		157	9.9899	9.2604		157	9.6424	10.2072		157	8.8991	8.6794		157	9.3794	9.3066
158	10.7379	9.7166		158	10.1391	9.3134		158	8.9733	9.6213		158	9.6495	9.6251		158	9.363	9.0166
159	10.5205	9.3389		159	10.1957	9.4412		159	9.5261	9.8663		159	9.4681	9.5576		159	9.5897	9.0722
160	9.9496	9.0619		160	10.453	9.3302		160	9.4896	9.3258		160	9.5549	9.1983		160	9.746	9.5612
161	10.2546	9.4601		161	10.0554	9.3996		161	9.9944	10.261		161	9.9051	9.1612		161	9.6865	9.549
162	10.5421	9.2665		162	10.0499	9.0812		162	9.9933	10.0365		162	9.4643	9.4246		162	9.801	8.7801
163	10.4121	9.3836		163	10.0427	9.6729		163	9.223	10.0755		163	9.8391	9.143		163	10.0739	9.624
164	9.7264	9.3342		164	10.6843	10.0479		164	9.6095	9.9419		164	9.308	9.3115		164	9.4442	9.2806
165	10.2681	9.2265		165	10.9722	9.7897		165	8.9325	9.2099		165	9.6864	8.9208		165	9.6271	8.8658
166	10.5819	9.3186		166	9.4563	8.8066		166	9.9069	10.239		166	9.2722	9.2511		166	10.1976	9.321
167	10.1635	8.8456		167	9.8417	8.9068		167	9.2513	9.6715		167	9.6676	9.5225		167	10.0088	9.7902
168	10.3088	9.4286		168	9.4161	9.0756		168	9.4123	9.7781		168	9.8096	9.3631		168	9.8259	9.2268
169	10.9511	9.3063		169	10.106	9.0254		169	9.5329	10.0587		169	9.3663	9.2805		169	9.6231	9.2105
170	9.9844	9.0309		170	9.9254	8.9101		170	9.2833	9.9937		170	9.3482	9.5124		170	9.7326	9.5538
171	9.7981	8.8092		171	9.7159	9.145		171	9.4505	9.7293		171	9.8879	9.5308		171	9.6275	9.2135
172	10.303	9.3484		172	9.9443	9.4793		172	9.6941	9.6557		172	9.5382	9.2458		172	9.4932	9.4789
173	10.743	9.9922		173	9.6013	9.0756		173	9.5691	9.6371		173	9.3853	9.3732		173	10.0658	9.6204
174	10.3173	9.2317		174	10.0269	9.1165		174	9.2859	9.5164		174	9.6163	9.4086		174	9.6225	9.032
175	10.4581	9.4096		175	10.3383	9.7154		175	9.5263	10.0742		175	9.6995	9.2993		175	10.0845	9.9362
176	10.5254	9.3413		176	10.0641	9.5355		176	9.5894	9.7686		176	9.3127	9.2495		176	9.2959	9.0259
177	10.0803	9.3887		177	10.5157	9.6528		177	9.4503	9.7605		177	9.63	9.2598		177	9.7413	9.7558
178	10.691	9.5331		178	9.5784	9.2553		178	9.765	10.0801		178	9.6137	9.7936		178	9.3325	9.3246
179	10.1239	8.6808		179	9.4996	8.9717		179	9.179	9.4701		179	9.6297	9.4791		179	9.7448	9.3734
180	9.9095	8.9283		180	10.2277	9.2682		180	9.6231	10.088		180	9.7404	8.88		180	9.2274	8.6606
181	10.3792	9.1419		181	10.2042	9.2863		181	9.5911	10.0134		181	9.7976	9.5385		181	9.6175	8.7501
182	10.7783	9.2414		182	10.0373	9.468		182	9.5736	9.5958		182	9.6131	9.1522		182	9.264	8.421
183	10.3308	9.2024		183	10.6693	9.2109		183	9.5537	9.5693		183	9.6963	9.7321		183	9.7016	8.7589
184	10.1392	9.5027		184	10.0807	9.3467		184	9.7296	9.6432		184	9.7025	9.6187		184	9.2727	8.7924
185	10.1163	9.0469		185	9.8974	9.4328		185	8.9859	9.5411		185	9.3066	9.3384		185	9.1151	8.8799
186	10.3996	8.8758		186	10.2006	9.2194		186	9.3792	8.8524		186	9.7983	9.1399		186	9.7479	9.3931
187	9.5661	9.3812		187	10.4231	9.2658		187	9.4088	9.4597		187	9.1387	9.6202		187	9.7835	9.289
188	10.4063	9.3511		188	10.896	9.0189		188	9.613	9.863		188	9.872	9.4275		188	8.9188	8.9653
189	10.4365	8.8542		189	9.7835	9.1499		189	9.5933	9.9503		189	9.8718	9.8625		189	9.2104	8.747
190	9.8885	9.2729		190	9.8145	9.4815		190	9.6834	9.7596		190	10.0006	9.3934		190	10.1561	9.3432
191	9.4943	9.347		191	9.9914	8.874		191	9.5243	9.7551		191	10.3794	9.7589		191	10.1174	9.4571
192	10.2235	9.2602		192	10.2234	9.0022		192	9.4216	10.0412		192	10.0912	9.4709		192	9.5612	9.4979
193	9.7328	9.2442		193	9.8199	9.151		193	9.1626	9.5805		193	10.0563	9.829		193	9.3894	8.7599
194	10.656	9.5846		194	10.1896	9.3319		194	9.5138	10.0105		194	9.6699	9.8087		194	9.563	9.741
195	10.0397	9.4501		195	10.6733	9.8858		195	9.2091	9.8361		195	9.5511	9.4681		195	9.2929	8.587
196	10.5098	9.2347		196	10.3192	9.632		196	9.8629	9.3775		196	9.3116	9.1277		196	9.7867	9.5199
197	10.0898	9.4201		197	10.3201	9.3334		197	9.3465	9.6663		197	9.7522	9.5513		197	8.9679	8.6568
198	10.3983	9.3794		198	9.7919	8.8569		198	8.992	9.1102		198	8.9314	9.3492		198	9.4981	8.8877
199	9.8014	9.1574		199	10.179	9.0449		199	9.3816	9.7166		199	9.5972	9.418		199	9.6486	9.0036
200	10.5916	9.0211		200	10.1674	9.5443		200	9.6169	9.5635		200	9.8853	9.4013		200	9.5906	9.1705
201	9.9507	9.2519		201	10.0471	9.3861		201	9.625	9.6285		201	9.8565	9.435		201	9.9129	8.7386
202	10.0124	8.8903		202	10.1295	9.3093		202	9.1251	9.3253		202	9.9068	9.2822		202	9.4419	8.9006
203	9.9193	9.1254		203	10.4386	9.2801		203	9.4551	9.3481		203	9.7658	8.9376		203	9.8675	9.5638
204	9.8645	9.0419		204	10.4273	9.484		204	9.0509	9.5474		204	9.3169	8.904		204	9.6465	9.7003
205	9.4387	8.6415		205	9.7685	8.9327		205	9.4523	9.6247		205	9.5119	9.8188		205	9.6642	8.9697
206	10.3215	9.7021		206	9.7282	9.3202		206	9.3433	9.5618		206	9.6553	9.7505		206	9.1191	9.244
207	10.1746	9.2066		207	9.7059	8.8829		207	9.1926	9.4503		207	10.2717	9.4186		207	10.4232	9.4211
208	9.9889	8.9953		208	10.0258	8.7302		208	8.9295	9.6934		208	9.9326	9.3161		208	10.2657	9.2266
209	10.2911	8.8625		209	10.0039	9.1939		209	9.4249	9.3537		209	9.9785	9.1615		209	9.7026	9.2984
210	10.41	9.2454		210	9.7595	9.1368		210	9.8036	9.684		210	9.4575	9.6123		210	10.1592	9.6682
211	10.1283	9.4784		211	10.0208	9.157		211	9.4862	9.8911		211	9.7942	9.6671		211	9.7339	9.5965
212	9.9614	8.7067		212	9.8936	8.8932		212	9.785	9.9712		212	9.3135	9.7993		212	9.0135	8.6812
213	10.344	8.7605		213	9.9015	9.2019		213	9.108	9.4411		213	10.1527	9.8451		213	9.795	8.9651
214	9.8498	8.7716		214	9.7352	8.6861		214	9.3595	9.8305		214	9.6507	9.2051		214	9.987	9.9057
215	9.5091	8.7256		215	10.5809	9.3779		215	9.308	10.0133		215	9.8663	9.0917		215	9.4391	9.0122
216	10.6877	9.7268		216	9.5987	8.9737		216	9.3169	9.7143		216	9.8588	8.9781		216	9.9003	9.5986
217	9.7613	9.1056		217	10.3039	9.5502		217	9.3073	9.5944		217	9.7046	9.5327		217	9.608	8.9975
218	9.8539	8.8957		218	10.1763	9.7482		218	9.1018	9.443		218	9.76	9.5453		218	10.2008	9.4266
219	9.934	8.66		219	10.5085	9.5245		219	9.6915	9.669		219	9.2957	9.473		219	10.065	9.1593
220	10.5261	8.7853		220	10.7008	9.5413		220	9.6791	9.8774		220	9.6253	9.4159		220	9.7721	9.3175
221	9.8296	8.9232		221	10.3918	9.4635		221	9.4885	9.8692		221	10.0546	9.411		221	9.9544	9.0978
222	9.9215	8.2923		222	10.2181	9.3348		222	9.5106	9.5907		222	10.115	9.5272		222	9.8417	9.3013
223	10.3311	8.6892		223	10.128	10.0215		223	9.3232	9.7082		223	9.8594	9.5621		223	10.084	9.073
224	9.5577	9.1533		224	9.7679	9.8232		224	9.4252	9.6784		224	8.8802	9.3931		224	10.1457	9.4532
225	9.3994	8.4495		225	9.734	9.791		225	9.2079	9.2889		225	10.2071	9.7729		225	10.1382	9.3433
226	9.8878	9.0704		226	9.5288	9.4644		226	9.7722	9.6146		226	9.8239	9.2561		226	10.2334	9.6026
227	9.8045	9.151		227	9.8581	10.0732		227	9.2342	9.6681		227	10.1624	9.6156		227	10.3643	9.7442
228	9.5233	9.0635		228	9.7492	10.1946		228	9.3997	9.8479		228	8.9666	9.3525		228	10.3502	9.6581
229	9.4966	8.3998		229	10.1168	9.8229		229	8.9324	9.2159		229	9.4	9.6639		229	9.7216	9.3204
230	9.7028	8.6033		230	10.1624	9.7676		230	9.5441	9.9807		230	9.4777	9.8216		230	9.945	9.5164
231	9.8535	8.9547		231	10.0311	10.2847		231	9.1716	9.6504		231	10.3137	9.618		231	9.7603	9.2622
232	9.5736	8.7262		232	9.8385	9.8129		232	9.3875	9.677		232	9.9334	9.1871		232	9.9677	9.6674
233	9.86	9.1248		233	10.0325	9.6665		233	9.3969	9.6275		233	9.7282	9.5924		233	10.2276	9.7323
234	10.1766	9.1237		234	10.0014	9.7533		234	9.3685	9.7657		234	9.4629	9.512		234	10.1101	9.5368
235	10.1014	9.1488		235	9.9715	10.1693		235	9.2121	9.7086		235	9.269	9.4402		235	10.502	9.9821
236	10.0943	9.4634		236	10.2818	10.0282		236	9.4995	9.9953		236	9.2698	9.5343		236	10.0876	9.8139
237	9.8173	8.8613		237	10.181	9.6218		237	9.1098	9.5808		237	9.8005	10.0149		237	10.4325	9.8724
238	9.7094	9.4206		238	10.1592	9.9087		238	9.716	9.5341		238	9.6207	9.7865		238	9.8999	9.2445
239	9.5362	8.6134		239	10.2943	9.5919		239	9.5108	9.3857		239	9.5734	9.9726		239	9.765	9.0577
240	9.1542	8.4845		240	10.5391	9.5342		240	9.3863	9.4294		240	9.343	10.0749		240	9.7381	9.4796
241	9.3502	8.8682		241	10.0774	9.8		241	9.5328	9.7853		241	9.7669	10.359		241	10.1362	9.6295
242	10.1641	9.4418		242	10.6654	9.5193		242	9.3146	9.5287		242	9.345	9.7947		242	10.1274	9.4055
243	9.4483	8.8676		243	10.0509	9.7104		243	9.1385	9.5309		243	9.4287	9.587		243	10.0528	8.9898
244	10.3685	9.4368		244	10.1008	9.5855		244	9.3724	9.6234		244	9.6186	9.8558		244	10.5092	9.68
245	10.1168	9.4874		245	9.6662	10.0346		245	9.3719	9.9846		245	9.7228	9.7376		245	10.0624	9.1206
246	10.3416	8.9713		246	10.0449	9.8116		246	9.3644	9.7867		246	10.0822	9.7798		246	10.0038	9.2863
247	9.8805	9.2357		247	10.1861	9.5458		247	9.1018	9.5479		247	9.2808	9.6417		247	10.1066	9.7268
248	9.5738	9.2755		248	10.288	9.9032		248	9.6954	9.7713		248	9.509	9.7437		248	10.2034	9.5209
249	9.966	8.6325		249	9.5879	9.5801		249	9.1802	9.1961		249	9.3235	9.4039		249	9.9184	9.4116
250	10.4202	9.2071		250	9.9489	9.436		250	9.4851	9.4375		250	9.1543	9.5175		250	10.4407	10.0506
251	10.5077	9.4048		251	9.9785	9.3395		251	9.4087	9.4198		251	9.4713	9.5591		251	9.8802	9.1761
252	9.8032	8.9629		252	9.9439	9.4902		252	9.8541	10.0468		252	9.1755	9.7167		252	9.9846	10.0639
253	10.2391	8.8889		253	9.8142	9.178		253	9.4882	9.7094		253	9.8595	9.8348		253	9.9777	9.3125
254	9.7233	8.9621		254	9.694	9.3206		254	9.2496	9.3692		254	9.9399	9.843		254	9.7606	9.7273
255	9.827	8.9544		255	10.2095	9.0026		255	9.2755	9.7036		255	8.9124	9.2346		255	9.7142	9.3101
256	9.6099	8.7733		256	10.7159	9.7066		256	9.3769	9.6488		256	9.2946	10.0456		256	10.1771	9.5763
257	10.4506	9.1099		257	11.0002	8.9119		257	9.7315	9.5473		257	9.641	9.6978		257	9.3114	9.7525
258	9.7951	9.1586		258	11.2009	9.4149		258	9.6669	9.399		258	9.2449	8.9729		258	9.8815	9.831
259	10.3141	9.1319		259	10.222	9.3139		259	9.036	9.1728		259	9.0667	9.1594		259	9.6736	9.6872
260	9.7907	8.6545		260	10.7913	8.8959		260	9.3403	9.6462		260	9.3714	9.5998		260	9.5546	9.7837
261	9.9679	9.1334		261	11.5101	9.6945		261	9.3364	9.7186		261	9.6985	9.5908		261	9.933	9.6528
262	9.7912	8.8708		262	10.5293	9.1411		262	9.4321	9.5279		262	9.479	9.3929		262	9.4725	9.5831
263	9.692	8.9861		263	10.4921	9.4467		263	9.4314	9.9931		263	9.8538	9.5193		263	9.7149	9.8541
264	10.608	9.475		264	11.165	9.7474		264	9.4446	9.6843		264	9.7957	9.7905		264	9.8532	9.6387
265	10.4271	9.4808		265	10.9022	9.5649		265	9.6217	9.6185		265	9.4287	9.4011		265	10.0084	9.4253
266	10.2142	8.9142		266	10.7534	9.7352		266	9.5512	9.9299		266	9.3988	9.3681		266	9.037	8.8701
267	9.9333	9.0416		267	10.6535	9.7257		267	9.1832	9.4526		267	9.7041	9.1045		267	9.59	9.5975
268	9.6747	9.1758		268	9.8876	9.0162		268	9.2747	9.879		268	10.344	9.2549		268	9.7793	9.2519
269	10.4568	9.4983		269	10.0127	9.2511		269	9.9236	10.159		269	9.1442	8.9993		269	9.6424	9.5062
270	10.1925	9.4543		270	10.0888	9.317		270	9.4936	9.4493		270	8.5781	8.4936		270	9.4908	9.598
271	9.648	8.9426		271	10.5972	9.6558		271	9.2778	9.5119		271	10.0957	10.157		271	10.3669	9.1245
272	9.993	8.9955		272	10.3211	9.384		272	9.4471	9.7014		272	10.532	10.2744		272	9.551	9.2687
273	9.7096	9.1601		273	9.9731	9.0031		273	9.3697	9.6854		273	10.3366	9.8986		273	9.7829	9.3283
274	9.6449	8.8363		274	10.3847	9.4683		274	9.194	9.389		274	9.654	9.2299		274	9.4149	9.5341
275	9.5338	8.6746		275	10.2996	9.1556		275	9.559	9.446		275	9.7602	9.4508		275	9.4442	9.0005
276	10.2227	9.0046		276	10.924	9.9597		276	9.6708	9.4158		276	9.8082	9.4036		276	9.3239	8.9061
277	10.1147	9.1666		277	10.1984	10.0684		277	9.5568	9.7426		277	9.5882	9.5929		277	9.7737	9.8278
278	10.1801	9.194		278	10.0834	9.5315		278	9.8322	9.6895		278	9.7937	9.3885		278	9.2465	9.1127
279	10.1091	9.3195		279	9.891	9.4905		279	9.3141	9.9634		279	9.4232	9.2357		279	9.7349	9.4718
280	10.4013	9.317		280	9.7035	8.8935		280	9.5806	9.6552		280	10.0499	9.8356		280	9.8128	9.242
281	9.3057	8.5687		281	9.9739	9.3113		281	9.4385	9.4199		281	10.2357	9.9711		281	9.3709	9.036
282	10.0173	8.95		282	9.8476	9.381		282	9.2787	9.3114		282	9.6999	9.7253		282	9.3258	9.2298
283	9.8277	9.6438		283	10.2145	9.5283		283	9.3277	9.8679		283	9.6889	9.6371		283	9.9583	9.8277
284	10.2757	9.0189		284	9.9269	9.0169		284	9.6365	9.5019		284	9.8226	9.9335		284	10.1401	9.835
285	9.8874	9.0239		285	10.5177	9.4171		285	9.376	9.7383		285	9.6531	9.7449		285	9.4261	9.8355
286	10.1349	8.7471		286	9.9376	9.1321		286	9.7736	9.7065		286	9.725	9.5813		286	9.1572	8.9902
287	9.5508	8.6442		287	10.755	9.6234		287	9.6098	9.5771		287	9.4617	9.4526		287	9.5383	9.6086
288	9.7674	9.1421		288	9.6519	8.7096		288	9.5011	9.7601		288	9.7954	9.3578		288	9.3199	9.2999
289	9.8973	9.6281		289	10.6832	9.6032		289	9.3584	9.7028		289	10.1925	9.429		289	9.227	9.5163
290	9.6525	8.9018		290	10.4337	9.823		290	9.1111	9.6812		290	9.9437	9.492		290	8.9595	8.8566
291	9.8398	9.3014		291	10.1768	9.0062		291	9.4484	10.0999		291	9.9809	9.5469		291	8.9918	8.2302
292	10.1275	9.3537		292	11.3246	9.9298		292	9.8259	10.4089		292	9.658	9.1579		292	9.1287	8.3627
293	9.7408	9.0344		293	10.8525	9.713		293	9.4972	9.605		293	10.024	9.2937		293	9.4277	8.3183
294	9.5591	8.9892		294	10.2484	9.261		294	9.599	9.8458		294	9.0134	8.7431		294	9.1524	8.6844
295	9.6426	9.4466		295	10.5289	9.0998		295	9.298	9.5157		295	9.6491	9.5755		295	10.2176	9.3514
296	10.1397	9.5028		296	11.3237	9.5985		296	9.2977	9.6705		296	10.357	9.4645		296	9.842	9.2913
297	9.5085	8.8714		297	10.5608	9.2931		297	9.3467	9.8105		297	10.1292	9.5249		297	9.9868	9.4176
298	9.9408	9.2326		298	10.2688	9.5207		298	9.3297	9.6627		298	9.4044	9.423		298	9.4387	8.5491
299	9.7527	8.8353		299	10.3065	9.5472		299	9.3747	9.7498		299	9.0527	9.26		299	10.0288	9.6176
300	9.7641	9.2483		300	10.8176	9.9379		300	9.5655	9.9715		300	9.947	9.6546		300	10.0265	9.568
301	9.7156	8.5833		301	10.5209	9.4208		301	9.2234	9.991		301	9.8983	9.2215		301	10.0011	9.1066
302	9.2377	8.7879		302	10.2209	9.3952		302	9.1473	9.8781		302	9.2813	8.9808		302	10.0108	9.7554
303	9.7416	8.5856		303	10.6688	9.162		303	9.6849	9.8909		303	9.2558	9.2663		303	9.8212	9.5979
304	10.2343	9.2192		304	10.5286	9.7033		304	9.4408	9.6934		304	9.6237	9.3038		304	9.837	9.0401
305	9.5622	8.8913		305	10.017	8.9466		305	9.7885	10.0673		305	9.4728	8.954		305	10.201	9.5253
306	9.8356	9.2213		306	10.6589	9.8937		306	9.4956	9.7456		306	9.6734	10.1302		306	9.982	9.693
307	9.6408	8.7676		307	10.9938	9.5431		307	9.1021	9.3554		307	9.6189	9.3434		307	10.201	9.7837
308	10.1361	8.5514		308	10.1679	8.9018		308	9.398	10.1416		308	9.2657	9.4078		308	9.8174	9.2113
309	9.9815	9.8052		309	11.0225	9.6472		309	9.6474	9.936		309	9.0446	8.8846		309	10.0027	9.6177
310	10.2666	9.0732		310	11.0875	9.8187		310	8.9989	9.735		310	9.3685	8.9418		310	10.2833	10.0586
311	9.9408	9.1768		311	10.5237	9.4015		311	9.2809	9.5565		311	9.3392	9.553		311	9.7962	9.6399
312	9.8482	9.0596		312	10.8648	10.013		312	9.7187	9.9512		312	10.3768	10.1466		312	9.8835	9.4952
313	10.4027	9.3307		313	9.996	8.731		313	9.4815	10.207		313	10.3741	9.941		313	9.9267	9.5831
314	9.6013	8.6827		314	10.2015	8.989		314	9.5891	9.9273		314	9.7973	9.2835		314	9.0519	9.23
315	9.4326	8.8768		315	10.9539	9.8629		315	9.6314	10.2839		315	9.5957	10.1007		315	9.9721	9.5197
316	10.0753	8.824		316	10.4802	9.6013		316	9.4207	9.5151		316	10.0411	9.5769		316	9.9915	9.2956
317	9.9504	8.8204		317	10.7543	9.673		317	9.2568	9.6397		317	10.1824	10.0552		317	9.2637	9.2551
318	9.8544	9.4337		318	10.2332	8.9743		318	9.6874	10.6732		318	9.6333	9.993		318	9.9973	9.1346
319	10.0871	8.9285		319	10.2086	9.1186		319	9.1923	10.0808		319	9.543	9.6258		319	9.7299	9.5185
320	9.6713	8.9088		320	10.3099	9.3991		320	9.4778	9.7887		320	9.6046	9.439		320	9.4966	9.4134
321	9.6437	8.9517		321	10.4459	9.0709		321	9.4323	9.8313		321	9.8312	9.6788		321	9.3874	9.1188
322	10.1387	8.7491		322	10.2437	9.5104		322	9.5752	9.7073		322	10.0054	9.7716		322	9.5715	9.3374
323	9.7634	8.9542		323	9.8715	9.0592		323	9.0863	9.5024		323	10.1069	9.53		323	9.2998	9.1242
324	9.9851	9.1143		324	10.4794	9.5028		324	8.98	9.4686		324	9.6666	9.383		324	10.3808	9.8597
325	10.2107	9.0127		325	10.4711	9.174		325	9.5014	10.0624		325	10.0962	9.4134		325	10.0905	9.3475
326	9.9818	9.3857		326	9.9026	9.2316		326	9.0238	9.7465		326	9.8263	9.636		326	9.9037	8.8386
327	10.3115	9.2052		327	10.3148	9.2018		327	9.4353	9.7881		327	9.7163	9.613		327	10.1109	9.3343
328	9.5526	8.7949		328	10.3289	9.4367		328	9.4851	9.8314		328	9.5047	9.3822		328	10.6248	9.8115
329	9.648	8.674		329	11.2288	9.9093		329	9.5983	9.6608		329	9.5221	9.8617		329	10.8999	9.8304
330	9.5843	8.9146		330	10.4071	9.646		330	9.6095	10.1205		330	9.1359	9.2715		330	10.4663	9.5748
331	9.3994	8.8901		331	10.1237	9.359		331	9.4294	9.8448		331	9.3203	9.7287		331	10.5532	9.8039
332	9.9156	8.5561		332	10.3855	9.5808		332	9.5864	9.6379		332	9.8894	9.8384		332	10.0242	9.3036
333	9.434	9.0424		333	10.084	9.5034		333	9.3223	9.9059		333	9.3051	9.6512		333	10.519	10.432
334	10.0455	9.2005		334	10.314	9.57		334	9.7527	9.5626		334	9.2703	9.7854		334	10.606	10.3304
335	10.2202	9.2389		335	10.5738	9.6794		335	9.7671	10.0088		335	9.6691	10.1105		335	10.5088	10.0104
336	9.9967	9.145		336	9.571	9.1222		336	9.7968	9.7431		336	8.8351	9.4802		336	10.7722	10.3025
337	9.8186	9.3361		337	9.5222	8.9383		337	9.7247	9.6419		337	9.6141	10.0837		337	10.1273	9.7836
338	9.3824	8.9358		338	9.9916	8.9229		338	9.5317	9.8576		338	9.1087	9.7168		338	10.3245	9.5731
339	9.7735	8.7676		339	9.9296	9.2664		339	9.3909	9.555		339	9.0856	9.462		339	10.3147	9.8303
340	9.184	8.5657		340	10.4462	9.1083		340	9.4235	9.7349		340	9.5111	9.8166		340	10.1845	9.8882
341	10.0506	8.7376		341	10.411	9.1039		341	9.6827	9.9436		341	9.9813	9.8817		341	10.724	10.4507
342	9.7623	8.7608		342	10.3172	9.2325		342	9.2719	9.5616		342	9.4724	9.6069		342	9.8943	9.4991
343	10.5406	9.3289		343	10.2636	9.5818		343	9.7378	9.4806		343	8.7315	9.7242		343	9.5985	9.0814
344	10.0845	8.9439		344	10.2236	9.7		344	9.1572	9.3349		344	9.8475	10.091		344	9.781	9.5156
345	9.9883	8.6776		345	9.5386	9.3888		345	9.7568	9.968		345	10.0653	10.1025		345	10.3172	10.0771
346	9.4036	8.4911		346	10.5021	9.5425		346	9.5257	9.3921		346	9.5125	9.4956		346	10.6602	9.5751
347	9.8028	8.6269		347	9.8971	8.8671		347	9.4682	9.4477		347	9.9105	9.6304		347	10.7005	8.9187
348	9.8739	8.9951		348	10.1669	9.3554		348	9.478	9.3192		348	9.905	10.061		348	11.0522	9.6474
349	10.005	8.9804		349	10.3802	9.2502		349	9.2793	9.3206		349	9.9427	10.6268		349	10.2861	9.982
350	10.0519	8.5259		350	9.8587	9.0845		350	9.5344	9.8961		350	8.8615	9.4643		350	10.2958	9.6152
351	10.0541	8.6627		351	10.2719	9.3657		351	9.5928	9.6666		351	9.7871	9.8475		351	10.092	9.2935
352	9.9274	8.7151		352	10.113	9.2647		352	8.9348	9.3973		352	9.239	9.8583		352	10.1941	9.4692
353	10.0321	9.2049		353	9.8166	8.4385		353	9.2793	9.476		353	9.8033	10.2285		353	10.4443	9.8579
354	10.1009	8.9437		354	10.3132	9.5827		354	9.8113	9.8868		354	9.8973	10.3302		354	10.1336	9.6261
355	10.172	9.3079		355	9.5307	8.8211		355	9.4994	9.8057		355	9.7963	10.0717		355	10.2061	9.7761
356	9.1342	8.2511		356	10.2165	9.4882		356	9.0841	9.6961		356	9.6508	9.7196		356	9.9301	9.6643
357	9.829	8.9984		357	10.1921	9.9072		357	9.9353	10.0353		357	10.0689	10.2191		357	10.4551	9.1309
358	10.455	9.7007		358	9.7271	9.236		358	9.2945	9.6361		358	9.6458	9.7202		358	10.2644	9.1968
359	9.9945	9.4622		359	10.3445	9.5094		359	9.7579	10.2469		359	9.9504	9.7353		359	10.5618	9.9778
360	9.9803	9.2747		360	9.8261	9.5079		360	9.085	10.5533		360	9.523	9.3099		360	11.2953	10.1582
361	9.9286	9.2813		361	10.3893	9.1821		361	9.2917	9.7328		361	9.1608	9.2679		361	11.0572	10.2997
362	9.8184	9.3781		362	9.5408	8.6885		362	9.033	10.053		362	9.4384	10.0837		362	11.3023	11.0554
363	10.2606	9.6725		363	9.7859	8.7629		363	9.4649	9.8909		363	9.4892	9.5017		363	10.4146	10.5765
364	10.593	9.6136		364	9.6764	8.5025		364	9.397	9.7024		364	9.3058	9.2495		364	10.4433	10.0389
365	10.5288	9.4794		365	10.5899	9.3865		365	9.6449	9.9869		365	9.1739	9.2543		365	11.4561	10.4803
366	10.2791	9.0399		366	10.312	9.4873		366	9.1008	9.5208		366	9.9649	10.4662		366	10.6202	10.0136
367	10.4153	9.2909		367	10.3737	9.4437		367	9.0557	9.6744		367	9.3156	9.7675		367	9.8576	9.7398
368	10.2625	9.1045		368	9.8555	8.6422		368	9.3067	9.8189		368	9.3341	9.2239		368	10.4207	9.6112
369	10.8126	9.1804		369	10.2697	9.1137		369	9.3406	9.8811		369	9.8763	10.0898		369	11.1482	10.5179
370	10.1096	8.9437		370	10.1762	9.0029		370	9.7845	10.1038		370	9.8049	9.7072		370	9.9075	10.2199
371	10.5862	9.2523		371	10.2539	9.6066		371	8.998	9.6365		371	9.8776	10.3856		371	9.8773	10.0817
372	10.321	9.5299		372	10.344	9.3722		372	9.128	9.4892		372	9.8118	9.5173		372	10.0298	9.6959
373	10.0366	9.0074		373	9.9804	9.3513		373	9.279	10.0954		373	9.318	9.5324		373	10.063	9.7752
374	9.7055	9.0291		374	10.1922	9.05		374	9.951	9.8659		374	9.3778	9.9888		374	9.6745	9.709
375	9.7731	8.588		375	9.9733	8.803		375	9.5163	9.5746		375	9.2615	9.4275		375	9.4413	9.7731
376	10.3837	9.3715		376	10.0407	9.2224		376	8.8655	9.5233		376	9.5364	9.8393		376	10.3408	10.2941
377	10.2955	9.1871		377	10.1283	9.5429		377	9.5326	9.7475		377	9.7787	9.6285		377	10.0266	9.8886
378	11.0549	9.6002		378	9.8641	9.0164		378	9.3745	9.6189		378	9.6968	9.3041		378	10.2567	9.4393
379	10.2052	9.0129		379	10.0696	9.3352		379	9.3423	9.7724		379	9.5712	9.7576		379	9.4659	9.3827
380	10.3538	9.4087		380	9.4278	8.7874		380	9.027	9.6207		380	9.7668	9.8024		380	10.2633	10.1109
381	10.1475	8.7435		381	10.3624	9.7025		381	9.3629	9.7166		381	9.4562	9.4239		381	10.4376	10.3044
382	10.1651	8.6603		382	9.7403	9.0868		382	9.3636	9.9247		382	9.3272	9.638		382	9.5395	10.1525
383	9.7265	8.9544		383	9.5675	8.7638		383	9.3036	9.7635		383	9.3878	9.2774		383	10.6475	10.0108
384	10.1091	9.3123		384	10.2974	9.5365		384	9.7688	9.8984		384	8.9419	9.2654		384	10.416	10.4888
385	9.8249	9.068		385	10.1148	9.0643		385	9.2771	9.6251		385	9.3002	9.3969		385	9.942	10.4948
386	10.4874	9.4464		386	10.4094	9.4994		386	9.5561	9.7621		386	10.2371	9.879		386	9.496	9.8719
387	9.7863	8.9051		387	9.8028	8.6792		387	9.4951	9.7233		387	9.3002	9.5032		387	9.5654	9.6219
388	10.505	9.68		388	10.131	9.2493		388	9.1849	9.6821		388	9.8494	9.553		388	10.4494	10.1009
389	10.0699	8.8849		389	10.3256	9.3175		389	9.5119	9.6932		389	10.5591	9.9679		389	9.6448	9.3873
390	11.177	9.5347		390	9.646	8.8373		390	9.1181	9.7158		390	9.4662	9.2393		390	10.1537	9.8979
391	10.1378	9.3604		391	9.7016	8.6083		391	9.4396	10.1045		391	9.9651	9.0176		391	9.3927	10.1312
392	9.8541	8.4733		392	9.609	8.8874		392	9.2822	9.7247		392	9.6546	9.2748		392	9.695	9.8735
393	10.5247	9.2418		393	10.4686	9.1738		393	9.2822	9.6072		393	9.5209	9.3687		393	9.2598	9.6967
394	10.6995	9.4646		394	9.6436	9.449		394	9.1993	9.2077		394	10.0021	9.6442		394	10.3513	10.0557
395	9.9508	8.7999		395	9.2287	9.2911		395	9.6239	10.1593		395	9.6288	9.4288		395	10.0298	9.8633
396	10.4883	9.6135		396	10.1499	9.0465		396	9.4012	9.6161		396	9.5851	9.5299		396	10.4763	9.8872
397	10.2515	9.4711		397	10.0321	9.5365		397	9.3623	10.0604		397	9.7593	9.5441		397	9.925	9.6971
398	10.9348	9.4333		398	9.657	9.3775		398	9.4421	9.4288		398	10.2848	9.4014		398	9.6681	9.5964
399	10.0492	9.1592		399	9.9347	9.0588		399	9.3308	9.686		399	9.6164	9.0887		399	10.0359	10.069
400	10.4618	8.5414		400	9.9123	9.1077		400	9.4611	9.9166		400	10.3588	9.5129		400	10.3002	9.8487
401	10.1517	8.9571		401	9.8695	8.9629		401	9.3729	9.7543		401	9.701	9.9728		401	10.8231	10.9458
402	9.9986	8.9385		402	10.0464	9.1012		402	9.7214	9.9901		402	9.8613	9.6862		402	9.6788	9.8177
403	9.8987	9.2043		403	9.5496	8.7276		403	9.6476	10.116		403	9.4892	9.5334		403	9.9975	9.7593
404	10.1532	9.5683		404	9.9394	9.2431		404	9.6198	9.7786		404	9.0776	9.4384		404	9.9958	9.9808
405	10.4164	9.4922		405	10.1158	8.8362		405	9.6135	10.2792		405	9.4732	9.8058		405	10.323	10.6737
406	10.0477	9.6625		406	10.4354	8.9489		406	9.4261	9.9041		406	9.4252	9.6121		406	10.0487	10.3061
407	10.0235	9.2962		407	9.6666	9.5165		407	9.7209	9.5917		407	9.4683	9.4418		407	9.7951	9.994
408	10.124	9.4819		408	9.9339	9.0286		408	9.4475	9.8379		408	9.6365	9.6705		408	10.1456	9.9248
409	9.7667	8.9297		409	10.0948	8.7105		409	9.5512	10.4202		409	10.0784	9.0693		409	10.0597	9.7622
410	10.2485	8.9133		410	10.0922	9.1721		410	9.7698	9.5763		410	9.8635	9.3492		410	9.6135	9.2881
411	10.9017	9.7637		411	9.6002	8.5603		411	9.2696	9.6125		411	9.6771	9.4028		411	10.3124	9.765
412	10.1671	9.2482		412	9.4289	8.5054		412	9.0913	9.4596		412	9.8195	9.394		412	10.0861	9.9073
413	10.3072	9.4441		413	9.6463	8.8061		413	9.382	9.853		413	9.2632	9.356		413	10.1433	9.564
414	10.351	8.8239		414	9.6233	8.3522		414	9.971	9.8818		414	9.512	9.4552		414	9.7547	9.7726
415	9.9422	9.3108		415	9.7246	8.5638		415	9.8787	10.0543		415	9.5563	9.5493		415	9.7507	9.5823
416	10.0845	9.5223		416	10.5333	9.1067		416	9.2236	9.488		416	9.1516	9.3378		416	10.1917	10.0646
417	9.9811	9.4527		417	10.5804	9.3371		417	9.2407	9.3108		417	9.7706	9.3456		417	9.8998	9.5927
418	10.3585	9.3696		418	10.1981	9.2206		418	9.4963	10.2941		418	10.0239	10.0592		418	10.324	9.9761
419	10.263	9.3106		419	10.4054	9.3467		419	9.4315	10.0066		419	9.7551	9.6121		419	10.2349	9.8127
420	10.0187	9.2158		420	10.1378	9.0392		420	9.9818	9.8506		420	9.8774	9.6409		420	10.7945	10.1608
421	9.8059	8.7669		421	10.2931	9.1342		421	9.7471	10.1252		421	9.7781	10.0775		421	10.8447	10.5298
422	9.8354	9.0259		422	10.0462	8.7879		422	9.6071	9.9588		422	9.5621	10.2649		422	10.0036	9.8177
423	10.1778	8.8802		423	9.7266	8.7788		423	9.46	10.0458		423	10.0144	9.9792		423	10.4396	10.1588
424	10.2618	9.5515		424	10.2621	9.2223		424	9.9581	9.4974		424	8.9587	9.8268		424	10.0337	9.9675
425	9.8493	9.5066		425	11.0357	9.8115		425	9.5171	9.7466		425	10.2178	9.9979		425	9.6289	9.5393
426	10.3722	9.569		426	10.173	9.4698		426	9.4447	9.7402		426	9.6342	9.4566		426	10.6132	10.0463
427	10.5939	9.5302		427	10.2444	9.3897		427	9.6603	10.2067		427	9.9105	9.943		427	10.2178	9.6092
428	10.0068	8.8902		428	9.6344	9.2269		428	9.2062	9.6428		428	9.1548	9.1537		428	10.3778	10.1959
429	10.2285	9.1249		429	10.5245	9.794		429	9.3819	9.6787		429	9.684	10.2092		429	10.2168	10.3465
430	10.1733	9.7137		430	9.4558	8.8996		430	9.7051	9.7433		430	9.9265	10.1324		430	10.3115	9.888
431	10.9145	9.1895		431	9.9841	9.198		431	9.7359	10.0526		431	9.4781	10.1314		431	10.0458	10.2971
432	10.2115	8.8591		432	9.5716	8.5384		432	9.1743	9.5338		432	9.7504	10.1091		432	10.0313	9.8073
433	10.1177	9.0686		433	10.7591	9.6993		433	10.0415	10.4214		433	9.2669	9.5559		433	10.1322	10.1349
434	10.0491	9.097		434	9.7689	8.966		434	9.9935	10.7054		434	9.074	9.8481		434	9.4458	9.4786
435	10.3493	9.2947		435	10.0273	9.1669		435	10.0009	10.2963		435	9.254	9.8712		435	10.4796	9.9096
436	10.1384	9.9039		436	9.9107	9.0969		436	9.1772	9.9234		436	9.0665	9.8857		436	9.9115	9.5167
437	10.8659	8.9795		437	9.6831	9.3295		437	9.4924	10.0073		437	9.6119	10.2682		437	10.0166	9.6628
438	10.4412	9.6384		438	10.0395	8.619		438	9.1702	9.5817		438	9.1386	9.6887		438	9.5075	9.589
439	10.4059	9.2887		439	10.0519	8.8685		439	9.0586	9.9112		439	9.4764	9.8722		439	10.3704	10.0511
440	10.5064	9.7875		440	9.9582	9.2184		440	9.2548	9.6717		440	9.2116	9.6467		440	10.1976	9.5391
441	10.156	9.2041		441	10.7015	9.7176		441	9.5074	9.9921		441	9.515	9.6353		441	9.9354	9.4792
442	10.1673	9.8201		442	10.6684	9.6238		442	9.5388	9.6844		442	9.3656	9.8572		442	10.4101	10.1121
443	10.4632	10.0333		443	10.5095	9.2612		443	9.273	9.6877		443	9.1389	9.1905		443	10.1534	9.5609
444	10.6612	9.7127		444	10.718	9.4623		444	9.4826	10.1104		444	9.8789	9.7569		444	9.7519	9.2236
445	10.5126	9.4384		445	10.5856	9.3688		445	10.2664	10.7504		445	9.7165	9.5608		445	9.8692	9.7209
446	9.7304	9.476		446	11.2886	9.7305		446	9.1272	9.5665		446	10.1052	9.6308		446	9.79	9.4656
447	10.44	9.5913		447	10.7918	9.3375		447	9.9599	10.2691		447	9.5987	9.6637		447	10.5107	10.0494
448	10.2256	9.4559		448	10.5656	9.2258		448	10.2953	10.4538		448	9.7713	9.5895		448	10.1481	9.7936
449	10.8703	9.7013		449	10.6392	9.5605		449	9.8858	10.5277		449	9.9004	9.8348		449	9.8235	9.2371
450	10.4103	9.3964		450	11.0876	9.3364		450	10.0887	10.6004		450	9.8728	9.6301		450	9.8963	9.8693
451	10.7835	9.7217		451	10.2748	9.3075		451	9.8762	10.4978		451	9.8751	9.5573		451	10.309	9.7377
452	10.3398	9.8218		452	10.3258	9.5848		452	10.192	10.2818		452	9.785	8.977		452	9.6355	9.5764
453	10.5371	9.8371		453	11.0968	9.4839		453	9.9003	10.4587		453	9.5395	9.0268		453	9.9263	9.3373
454	10.388	9.4477		454	10.6357	9.4086		454	9.7181	10.3075		454	9.7252	9.2424		454	9.6613	9.3105
455	10.0003	9.4883		455	9.8996	8.8319		455	9.734	10.482		455	9.6959	9.3982		455	9.8719	9.6797
456	10.1747	8.9434		456	10.0835	9.1438		456	9.3418	9.8753		456	8.6414	8.9895		456	9.788	9.8475
457	10.3102	9.0637		457	9.9722	8.7424		457	10.1308	10.5979		457	9.6011	9.0968		457	10.3512	9.9261
458	9.9394	9.2364		458	9.8503	8.9368		458	8.9558	9.7593		458	9.4203	9.6953		458	10.5867	10.0199
459	9.9578	9.8667		459	10.4082	9.2056		459	9.3027	9.5604		459	9.5584	9.0663		459	9.832	9.9462
460	10.8738	10.181		460	10.003	8.933		460	9.5598	9.7792		460	9.7178	8.896		460	9.7387	9.7028
461	10.7636	9.6456		461	10.8892	9.3374		461	9.568	9.6134		461	9.3319	9.4083		461	9.7769	9.8852
462	10.4815	9.6954		462	10.4937	9.4436		462	9.3227	9.8117		462	9.0329	8.9692		462	10.1082	9.6923
463	10.7902	9.6094		463	10.1886	9.2747		463	9.4564	9.8351		463	9.0874	9.2474		463	10.2416	9.7206
464	10.3487	9.4944		464	10.4539	9.8103		464	9.1914	9.7845		464	9.6648	9.5327		464	9.5351	8.7784
465	10.1875	9.5117		465	10.7256	9.7872		465	9.2986	9.5477		465	9.7542	9.9149		465	9.7863	9.3889
466	10.657	9.671		466	10.5303	9.2751		466	9.1481	9.5758		466	10.2053	9.2457		466	10.629	10.1563
467	10.265	9.2979		467	10.1912	9.426		467	9.5775	9.9228		467	9.45	9.7769		467	9.9841	9.4704
468	10.3449	9.4692		468	10.3256	9.2802		468	9.4955	9.7607		468	9.7484	9.1609		468	9.9974	9.5715
469	10.481	9.9868		469	9.8968	9.0623		469	9.4966	9.907		469	9.9314	9.0339		469	10.068	9.4798
470	10.07	9.1731		470	10.5725	9.5635		470	9.8977	9.7159		470	10.0352	9.5479		470	9.7143	9.5253
471	10.6283	9.4126		471	10.1672	9.3285		471	9.5396	10.0776		471	9.2438	9.6287		471	10.0156	9.7176
472	10.4271	9.7488		472	9.9131	8.8415		472	9.1021	9.4909		472	9.6653	9.7451		472	9.7108	9.4819
473	10.2984	9.7002		473	10.1221	9.0662		473	9.7771	9.8393		473	9.9702	9.1161		473	10.0951	9.9665
474	10.5726	9.7617		474	10.161	9.4156		474	9.2886	9.7006		474	9.8022	9.55		474	9.5143	10.1819
475	10.1991	9.3162		475	10.0204	9.0214		475	9.3347	10.004		475	9.8442	9.8358		475	9.8324	10.1953
476	10.6752	9.4978		476	11.1732	9.7464		476	9.5223	9.9983		476	9.8474	9.826		476	9.7434	9.719
477	10.4631	9.6926		477	10.1853	8.9807		477	9.1244	9.4702		477	9.4597	9.553		477	10.475	9.5511
478	10.5842	9.0897		478	11.5807	10.2487		478	9.3874	10.0698		478	9.7313	9.9497		478	10.6035	9.8718
479	10.2301	9.5321		479	10.0214	8.9939		479	9.094	9.237		479	9.636	9.4781		479	10.1108	9.6537
480	10.6008	9.5642		480	10.0118	9.0019		480	9.5592	9.6003		480	9.5732	9.4721		480	9.8633	9.939
481	10.175	9.6396		481	10.0135	8.9761		481	9.4907	9.7723		481	8.9023	9.2276		481	9.8992	9.2814
482	9.5139	9.6852		482	10.2569	8.7788		482	8.8044	9.5699		482	10.0898	10.2611		482	9.6267	9.4974
483	10.1051	8.9699		483	9.9285	8.4018		483	9.612	9.7718		483	9.7147	9.6814		483	9.9532	9.5989
484	10.1484	9.6461		484	10.76	9.0472		484	9.4026	9.5071		484	9.8726	9.3343		484	10.0633	9.7347
485	9.9468	9.4563		485	10.063	8.5156		485	9.3976	9.919		485	9.8286	9.9787		485	9.8388	9.8177
486	10.281	10.0478		486	10.3935	8.8545		486	8.9071	9.7873		486	9.834	9.4051		486	9.8358	9.9885
487	10.5529	9.3302		487	10.9973	9.3567		487	9.2331	9.9936		487	9.8428	9.2428		487	10.4627	9.6128
488	10.6453	9.4544		488	10.3773	8.9332		488	9.1749	9.6851		488	9.7987	8.9529		488	10.3285	9.9347
489	9.6542	8.9286		489	11.3253	9.1892		489	9.5065	10.1564		489	10.353	9.8353		489	10.3993	9.9779
490	10.0463	8.9075		490	10.6141	8.8146		490	9.8189	10.3418		490	9.7166	9.1986		490	9.9786	9.6333
491	10.2165	9.1155		491	11.0897	9.0804		491	9.7348	10.3097		491	9.6637	9.5082		491	9.4955	9.5562
492	9.8241	9.2854		492	11.6874	8.7351		492	9.7112	10.0849		492	9.6715	10.2743		492	9.9476	9.7076
493	9.7349	9.0971		493	11.1132	8.3032		493	10.0753	10.6116		493	9.8346	9.2257		493	9.6697	9.2161
494	9.7597	9.1957		494	11.2658	8.6892		494	9.7984	10.3677		494	9.9929	9.829		494	10.0199	9.3668
495	10.5749	9.7022		495	10.7007	8.9691		495	9.8579	9.9747		495	10.0766	9.7228		495	10.2604	9.371
496	10.8591	9.7097		496	12.0877	8.6915		496	9.4723	10.4288		496	10.3412	9.7567		496	9.5556	9.0751
497	10.3796	9.356		497	11.7068	9.0704		497	9.756	10.1742		497	10.2749	10.019		497	10.2843	10.0368
498	10.3352	9.1169		498	11.2318	8.7108		498	10.0239	10.0628		498	10.0318	9.9708		498	9.6772	9.1989
499	10.0539	9.2251		499	10.5308	8.5046		499	9.5172	10.2558		499	10.0969	9.9559		499	8.9304	9.0162
500	9.955	9.0902		500	11.1343	8.7708		500	10.0911	10.8409		500	9.8473	9.6378		500	9.4909	9.3991
501	10.4352	9.8349		501	10.6682	9.0371		501	9.6955	10.0273		501	9.8921	9.5503		501	10.1979	9.9291
502	9.9072	8.8752		502	10.9051	9.1834		502	10.098	10.3474		502	9.7634	9.3587		502	9.921	9.6805
503	10.1748	9.6252		503	12.0893	9.3601		503	9.7567	10.3194		503	10.2221	9.6682		503	9.792	9.1335
504	10.1035	9.2075		504	10.3693	8.628		504	9.6351	10.0697		504	9.7887	9.6531		504	10.4324	9.782
505	10.1895	9.104		505	11.143	8.7676		505	9.6422	10.1604		505	10.1057	9.6457		505	9.7256	9.5026
506	9.8264	8.8844		506	11.3997	9.4083		506	10.0837	10.4285		506	10.3293	9.8413		506	9.6024	9.4922
507	10.1432	9.2733		507	12.9342	10.0303		507	9.8063	10.1663		507	9.9837	9.9627		507	10.0002	9.5022
508	10.0489	9.161		508	12.0133	9.5049		508	9.7414	10.2826		508	10.1159	10.0135		508	9.7892	9.8131
509	10.7386	9.9323		509	12.4293	9.8339		509	9.7157	9.98		509	9.826	10.0311		509	9.4293	9.1488
510	10.3178	9.6648		510	10.4537	9.2042		510	9.4603	10.5445		510	9.9261	9.7089		510	10.0196	9.9399
511	10.3275	9.8106		511	10.8977	9.1651		511	9.9546	10.3941		511	10.0799	10.1008		511	10.4037	9.7739
512	9.6898	9.5055		512	10.1428	8.7211		512	9.1566	9.8972		512	9.8225	9.7716		512	9.391	9.1782
513	9.9687	9.7287		513	10.5878	9.5912		513	9.6371	10.2187		513	9.9379	9.6876		513	10.9615	9.9757
514	10.4082	9.4793		514	10.4812	9.2897		514	10.1021	10.6219		514	10.1332	9.827		514	10.6556	9.8424
515	10.1604	9.3986		515	11.0693	9.4415		515	9.657	10.0408		515	10.1248	9.9625		515	10.5987	9.6181
516	10.1927	9.4513		516	10.9029	9.5427		516	9.426	10.1368		516	9.9396	10.1846		516	10.2615	9.6103
517	10.6091	9.6539		517	10.8052	9.4518		517	9.2187	9.8102		517	9.8409	9.8342		517	10.6857	9.9185
518	10.4085	9.619		518	10.6557	9.2963		518	9.5241	10.001		518	9.5761	9.4531		518	10.47	9.6368
519	9.8261	9.4907		519	10.3293	9.2075		519	9.916	10.3521		519	9.7225	9.9253		519	10.5757	9.5261
520	10.5467	9.7663		520	10.5397	9.5228		520	9.3103	10.3582		520	9.7282	10.3923		520	10.7267	9.5741
521	10.5757	9.4888		521	10.9313	9.7579		521	9.5917	9.9745		521	9.1702	9.051		521	9.9947	9.0701
522	10.4275	9.0889		522	11.0524	9.6943		522	9.3854	9.7488		522	9.456	9.2953		522	10.9765	9.3997
523	10.9574	9.8449		523	10.4821	9.1273		523	9.2803	9.8798		523	10.0078	9.4953		523	10.3594	9.5738
524	10.3383	9.468		524	10.7041	9.2668		524	9.909	10.3934		524	9.6505	9.4833		524	10.3507	9.951
525	10.6689	9.6102		525	9.7607	8.8923		525	9.4269	9.9042		525	9.6592	10.1005		525	10.2431	9.4262
526	10.861	9.6751		526	10.0211	9.3715		526	9.8849	10.1225		526	9.9535	9.2144		526	10.2682	9.1234
527	10.5609	9.4937		527	9.6353	8.6745		527	9.7597	9.7215		527	10.0517	9.735		527	9.6074	9.2629
528	9.9453	9.5784		528	9.8061	9.2224		528	9.2082	9.8435		528	9.5807	9.9169		528	9.9634	9.0696
529	11.0054	9.3074		529	9.5054	8.7098		529	9.2303	9.9669		529	9.8892	9.9061		529	10.5681	9.9597
530	10.7863	9.8058		530	10.0798	9.0114		530	8.9817	9.7193		530	9.8741	10.0929		530	10.4448	9.9286
531	10.5336	9.9139		531	9.7646	9.0614		531	8.7954	9.8269		531	10.2205	9.7826		531	9.8322	9.1102
532	10.5055	9.7595		532	10.1694	9.3254		532	9.0203	9.5821		532	10.1264	9.6278		532	10.2289	9.6259
533	10.228	10.1365		533	10.0624	8.9337		533	8.9292	9.7206		533	9.6068	9.8876		533	10.3163	8.982
534	10.6207	9.7281		534	10.5322	9.0548		534	9.3383	9.8788		534	9.6948	9.1888		534	9.7336	8.9515
535	10.6674	9.6547		535	9.6408	8.988		535	8.9474	9.9104		535	9.3852	9.0352		535	10.1065	9.0351
536	10.4299	9.7405		536	9.8043	9.0238		536	9.0505	9.5154		536	9.9388	9.4802		536	10.3872	9.4646
537	10.3261	9.3223		537	9.705	8.631		537	8.8618	9.2736		537	9.8413	9.8334		537	10.5753	9.522
538	10.08	9.5874		538	9.4556	8.8954		538	9.0763	9.4783		538	9.1464	9.4293		538	10.3694	9.6836
539	10.3544	9.3555		539	9.4503	9.1162		539	9.0321	10.3452		539	9.6333	9.6414		539	10.3106	9.226
540	10.2127	9.5106		540	9.341	9.0166		540	9.2085	9.7497		540	10.0858	10.0628		540	10.4608	9.9252
541	10.2993	10.2729		541	9.9802	9.6601		541	9.1472	9.6273		541	9.8368	9.9284		541	11.0077	9.6128
542	9.9376	9.3364		542	9.614	9.1707		542	9.3064	9.8832		542	10.4152	10.2308		542	9.9179	8.9075
543	9.9965	9.2967		543	9.869	9.1843		543	8.6753	9.6037		543	9.4324	9.3128		543	10.5725	9.9416
544	10.7203	9.9462		544	10.3058	9.2959		544	9.547	9.7944		544	9.7213	9.578		544	10.0205	9.1387
545	10.2604	9.4833		545	10.8021	9.0059		545	9.3103	9.848		545	9.2613	9.2011		545	10.404	9.5642
546	9.9069	9.3758		546	10.6229	9.2128		546	9.2341	9.8078		546	9.8983	9.747		546	10.3281	9.8882
547	10.5052	9.4009		547	9.829	9.0516		547	10.1163	9.9718		547	9.6904	9.5384		547	10.3106	9.3106
548	10.2168	9.8152		548	9.7887	9.191		548	9.2853	9.7945		548	9.7159	9.6047		548	10.1448	9.7868
549	10.4912	9.6606		549	9.6528	9.2354		549	9.6506	9.8025		549	9.7268	9.5814		549	10.0681	9.9517
550	9.9689	9.9283		550	9.7054	9.1169		550	9.3775	9.8234		550	9.5068	9.7592		550	10.636	10.1858
551	10.3727	9.6206		551	9.9517	8.6968		551	9.8448	10.2449		551	9.4206	9.4367		551	9.9016	9.1313
552	10.0184	9.3725		552	10.228	9.5368		552	9.8092	9.6802		552	9.9315	9.3173		552	9.8162	8.6286
553	10.2072	9.2904		553	9.9331	9.1186		553	9.4253	9.7148		553	9.7319	9.407		553	10.3464	9.0916
554	10.6595	10.0793		554	9.7427	8.6298		554	9.3796	9.9539		554	8.9468	9.3662		554	11.4315	10.1366
555	9.8188	9.379		555	10.8191	9.5554		555	9.3571	9.8652		555	9.3874	9.3827		555	10.0121	9.066
556	10.4719	9.763		556	10.6141	9.3826		556	9.6241	9.9642		556	9.3786	9.8946		556	10.0451	9.0327
557	9.8594	9.6705		557	10.5017	9.243		557	9.7443	9.8527		557	8.7243	9.0591		557	11.4241	10.3289
558	10.2967	9.396		558	10.2291	9.7787		558	9.3235	9.5329		558	9.3235	10.1495		558	10.1989	9.2787
559	10.1753	9.9298		559	10.2412	9.7042		559	9.7681	9.6788		559	9.3381	9.596		559	10.8311	9.2832
560	9.6296	9.6432		560	10.3023	9.3175		560	9.8248	10.0512		560	9.2779	8.9843		560	11.2995	10.0012
561	10.0806	9.3184		561	10.7747	9.5426		561	9.8246	10.1924		561	8.9498	9.3069		561	11.4173	9.7176
562	10.2368	9.6765		562	10.8591	9.3409		562	9.2125	9.6911		562	9.5903	9.355		562	10.7757	9.8636
563	10.1043	9.6788		563	10.6629	9.6527		563	9.4705	9.793		563	9.6975	9.8005		563	10.2709	8.6453
564	9.9183	9.563		564	10.3453	9.7765		564	9.3909	9.9033		564	9.6657	9.6486		564	10.9849	9.6985
565	9.7239	9.4181		565	9.5393	9.2964		565	9.4556	10.2072		565	9.2783	9.2513		565	9.9072	8.8592
566	10.3694	9.5629		566	10.5073	9.281		566	9.4056	9.941		566	9.3155	9.406		566	10.7726	9.7745
567	9.9486	10.0801		567	10.3024	9.2512		567	9.6965	10.1749		567	9.5548	9.8447		567	10.8747	9.8935
568	10.0586	9.881		568	9.6745	9.2707		568	9.4522	9.7623		568	9.1705	9.4949		568	11.3496	10.2326
569	10.2928	10.3397		569	9.8184	8.8628		569	9.4632	9.6812		569	9.5229	9.725		569	11.2789	9.977
570	10.0903	9.5178		570	9.7456	8.4588		570	9.4307	10.1944		570	9.032	9.2925		570	10.3659	9.382
571	9.8417	9.4029		571	9.8884	8.7718		571	9.5783	9.8982		571	9.198	10.0516		571	11.0149	9.5697
572	9.8983	9.7367		572	9.7062	8.8627		572	9.4208	9.9479		572	9.4256	9.6268		572	10.2725	9.1638
573	10.4779	9.8808		573	9.8355	8.9868		573	9.2401	9.5014		573	9.6326	9.568		573	10.3116	9.0598
574	10.0994	9.5117		574	9.4663	8.595		574	9.5384	9.5069		574	9.7378	9.9236		574	10.6796	9.5365
575	10.7326	9.8003		575	9.8162	9.0104		575	9.7629	9.75		575	9.3056	9.2336		575	10.4709	9.102
576	10.4668	9.8161		576	10.2353	9.2809		576	9.4921	9.6429		576	9.565	9.2773		576	10.3878	8.975
577	10.4367	10.0177		577	10.0334	9.0826		577	9.6223	10.032		577	9.5887	9.7075		577	10.4303	8.8649
578	10.1258	10.1875		578	9.7842	9.0484		578	9.3873	9.4921		578	9.253	9.7258		578	9.5687	8.8304
579	10.854	9.398		579	10.2412	9.0616		579	9.155	9.6868		579	9.7248	9.3304		579	10.7688	9.4808
580	10.3526	9.5353		580	10.1705	9.3661		580	9.3872	9.6022		580	8.6408	9.2317		580	10.3426	9.0516
581	10.1602	9.808		581	9.8161	9.4899		581	9.4018	9.7573		581	9.226	9.9524		581	10.1853	9.2656
582	10.4752	9.9077		582	10.083	9.2518		582	9.2407	9.3362		582	9.3593	9.454		582	9.3962	8.8646
583	10.4665	9.9902		583	10.2403	9.89		583	9.6343	10.4241		583	9.434	9.5364		583	9.1997	8.0017
584	10.1918	10.0883		584	10.0667	9.2653		584	9.2387	9.8123		584	9.8048	9.3615		584	9.3613	9.0199
585	10.2468	9.6265		585	10.5226	9.4597		585	9.4182	9.8331		585	9.1817	9.3444		585	9.9948	8.8918
586	10.6146	9.9186		586	10.0811	9.2981		586	9.6067	9.6707		586	9.0727	9.363		586	10.3176	9.6713
587	10.3545	9.6859		587	10.1959	9.3761		587	9.7876	9.8044		587	9.7345	9.5279		587	9.9076	8.9295
588	10.4508	9.8556		588	9.9559	9.1113		588	9.2683	10.0353		588	9.3708	9.9845		588	9.549	8.5132
589	9.9029	10.1134		589	10.1471	9.0304		589	9.4051	9.7399		589	9.7044	9.6951		589	10.3449	8.9103
590	9.9356	9.4258		590	10.1236	9.3602		590	9.4508	10.09		590	9.7635	9.899		590	9.7055	9.2342
591	9.9987	9.4713		591	10.1431	9.1401		591	9.2441	10.0406		591	8.941	9.5579		591	10.1866	8.7618
592	9.9143	9.633		592	10.1292	9.4777		592	9.6882	9.8694		592	9.2407	9.8588		592	10.2102	9.0845
593	10.1001	9.3558		593	9.9518	9.1453		593	9.3631	10.0295		593	9.3444	9.3166		593	10.6808	9.4489
594	10.1561	9.9287		594	9.9058	9.0477		594	9.4434	9.6103		594	9.3617	9.3739		594	9.9383	9.4916
595	10.6889	10.0438		595	10.0868	9.2498		595	9.603	9.8907		595	9.5899	9.4704		595	10.0726	9.4768
596	9.7984	9.0027		596	9.8314	9.487		596	9.1161	9.3951		596	9.3188	9.3683		596	10.1999	9.539
597	10.0232	9.6956		597	10.6398	9.2768		597	9.2701	9.819		597	9.3495	9.4205		597	10.3189	9.7213
598	10.8643	9.9619		598	10.276	9.8758		598	9.1511	9.3551		598	9.1651	9.4224		598	10.1	9.6262
599	10.111	9.5872		599	9.8366	9.333		599	9.2521	9.7687		599	9.5727	9.5818		599	10.3405	9.4939
600	9.6112	9.0942		600	10.0085	9.3699		600	9.1787	9.5847		600	9.8465	9.7467		600	10.0248	9.6861
601	9.6841	9.0196		601	9.6325	8.7852		601	9.6503	10.4525		601	9.709	9.937		601	10.9512	9.8363
602	10.059	9.4695		602	10.0305	9.2784		602	9.5575	10.0056		602	9.1214	9.4401		602	10.1468	8.8893
603	9.7571	9.3878		603	9.969	9.1957		603	9.3142	9.693		603	9.1838	9.1006		603	10.3832	9.198
604	9.8697	9.5327		604	9.6964	9.301		604	9.1511	9.9008		604	9.7362	9.7625		604	10.7376	9.8193
605	10.2271	9.7068		605	9.7127	9.3304		605	9.8222	10.0406		605	9.5395	9.1809		605	9.3194	8.9932
606	9.9988	9.2905		606	9.8489	9.0007		606	9.4716	9.757		606	9.6687	9.7868		606	9.7445	8.889
607	9.6965	8.9889		607	9.9612	8.966		607	9.249	9.4857		607	9.3479	9.6837		607	10.291	9.6287
608	10.2792	9.2858		608	9.0706	8.8008		608	9.1897	9.6139		608	9.2037	9.5543		608	9.9701	9.7491
609	10.3743	9.3033		609	9.4981	9.2108		609	9.5704	9.7189		609	9.4467	9.6388		609	9.8049	9.5329
610	10.2862	9.3355		610	9.046	8.7526		610	9.8032	9.9892		610	8.9943	9.5738		610	10.0342	10.3224
611	9.5809	8.9308		611	9.4791	9.0462		611	9.5232	9.5472		611	9.355	9.4127		611	10.0627	9.2743
612	9.603	9.0033		612	9.7982	9.2956		612	9.3766	9.5014		612	9.2296	9.6273		612	10.1097	9.6144
613	10.4057	9.7725		613	9.8274	8.9162		613	9.4862	9.5339		613	9.1542	10.1079		613	10.0462	9.4392
614	10.205	9.6029		614	10.1204	9.0939		614	9.6717	9.9948		614	9.2395	9.5078		614	10.8276	9.8642
615	9.9009	9.5042		615	9.8369	9.0752		615	9.4171	10.2407		615	10.0237	9.6468		615	10.3336	9.9497
616	10.0181	9.3434		616	9.7055	8.7435		616	9.4553	9.7827		616	9.3957	9.951		616	10.7265	10.1039
617	10.0929	9.5463		617	9.926	8.916		617	9.8416	10.0179		617	9.4654	9.8878		617	10.2243	9.9422
618	9.7538	9.8416		618	9.8617	9.0026		618	9.6726	9.6027		618	9.4642	9.9368		618	9.9401	9.748
619	10.1144	9.9151		619	9.8265	9.2339		619	9.3181	9.6328		619	9.825	9.9934		619	10.0899	9.369
620	10.2118	9.6121		620	9.5468	8.6272		620	9.3876	9.9124		620	9.4991	9.4975		620	10.2143	9.5546
621	10.5697	9.5674		621	9.6054	9.2403		621	9.6213	9.7738		621	9.3069	9.2275		621	9.8647	9.2428
622	10.7846	9.9234		622	10.1319	9.2891		622	9.6607	10.0433		622	9.2042	10.0136		622	10.1057	9.914
623	10.8435	9.6641		623	10.0812	9.1912		623	9.2337	9.4716		623	9.322	9.369		623	10.1081	9.43
624	10.2653	9.9768		624	9.6973	8.6594		624	9.5994	9.8778		624	10.0358	9.8871		624	10.843	9.6599
625	10.2218	9.9537		625	10.1501	9.0318		625	9.5224	9.582		625	10.225	10.2689		625	10.6013	9.9781
626	9.9335	9.6481		626	9.8045	8.9934		626	9.6884	9.5963		626	9.9053	10.4571		626	11.1487	9.9511
627	10.6564	9.9134		627	9.8592	9.2128		627	9.5965	9.9153		627	10.2928	9.7014		627	10.6733	9.6812
628	9.8611	9.2514		628	10.317	9.5477		628	9.4065	9.7496		628	9.4684	9.716		628	9.8499	9.3279
629	10.4373	9.5362		629	9.9462	8.8351		629	9.454	9.4778		629	9.5887	10.0246		629	9.8919	9.1924
630	10.3325	9.3815		630	9.9195	8.9197		630	9.269	9.562		630	9.7744	9.3215		630	9.5876	8.7737
631	9.6382	9.3667		631	9.5721	9.3566		631	9.6969	10.4419		631	9.2794	9.0149		631	10.165	9.5666
632	9.9874	9.4564		632	9.922	9.1089		632	9.3987	9.4695		632	9.729	10.1292		632	9.8682	9.3834
633	10.2921	10.122		633	10.1932	9.0508		633	9.7421	10.1172		633	9.4635	9.574		633	9.3894	8.5613
634	10.4044	9.8382		634	10.0101	9.6897		634	9.6332	10.1438		634	9.5341	9.9321		634	9.6079	8.6668
635	10.5739	10.0607		635	9.6478	8.9201		635	9.5178	9.9218		635	9.6546	9.38		635	8.8912	8.1243
636	10.152	9.4604		636	10.1016	8.7145		636	9.8831	10.5032		636	9.6845	9.6082		636	9.9846	9.2251
637	10.2356	9.5512		637	10.1736	9.7314		637	9.6509	10.1217		637	9.8261	10.0023		637	9.4514	9.1257
638	9.8947	9.1959		638	10.1324	9.2463		638	9.5724	9.8562		638	9.5767	9.7527		638	9.9743	8.9498
639	9.5399	8.9771		639	10.0875	9.0605		639	9.7288	9.8323		639	9.7541	9.5305		639	9.5133	9.3444
640	10.5742	9.5015		640	10.0652	9.3609		640	9.5226	9.7878		640	9.9505	10.0977		640	10.7767	9.7177
641	10.6452	9.5659		641	9.9892	9.4355		641	9.003	9.4046		641	9.3559	9.8897		641	10.2207	9.2931
642	9.9951	9.0295		642	10.0726	9.4669		642	9.3254	10.1167		642	10.1656	9.542		642	10.0956	9.8386
643	10.2844	9.3792		643	10.5739	9.3426		643	9.0687	9.152		643	9.6609	9.2607		643	10.51	9.8117
644	10.705	9.4025		644	9.5643	8.8322		644	9.1741	9.7242		644	9.737	9.6328		644	10.0307	9.7057
645	10.0257	9.7808		645	10.1317	9.0314		645	9.2179	9.935		645	9.587	9.4444		645	10.2318	9.533
646	10.7486	9.712		646	9.9818	8.9339		646	9.4995	9.6462		646	9.6389	9.4568		646	10.2564	9.3769
647	10.5781	10.0267		647	10.0047	8.8681		647	9.4572	9.534		647	9.6698	8.9754		647	10.2653	9.1139
648	10.5333	9.652		648	10.317	9.2596		648	9.208	9.4143		648	9.6632	9.4687		648	10.7856	10.3983
649	10.9282	9.4617		649	10.0039	9.2154		649	9.225	10.0253		649	9.5196	9.8548		649	10.1491	9.7212
650	11.1658	9.5071		650	10.4272	9.1417		650	9.2429	10.0026		650	9.3413	9.5377		650	10.6244	9.9109
651	11.7544	10.1013		651	10.0734	9.1792		651	9.3337	9.8956		651	9.2333	9.3416		651	9.2135	8.3616
652	10.3598	9.8197		652	9.9221	9.515		652	9.1986	9.4908		652	9.3859	9.4762		652	9.916	9.2011
653	10.1952	9.1543		653	10.6323	9.5835		653	9.4286	10.0132		653	9.7636	9.5726		653	10.1551	9.623
654	10.05	10.023		654	9.9399	9.2951		654	9.5715	9.9484		654	9.6227	9.4993		654	9.895	9.3916
655	9.9473	9.3111		655	9.5125	9.3731		655	9.229	9.929		655	10.4748	9.7407		655	9.9519	8.9558
656	9.9273	9.0208		656	10.2893	9.2437		656	9.1702	9.7737		656	9.6714	9.765		656	10.184	9.8907
657	10.0093	9.5139		657	9.8406	9.09		657	9.4117	10.0497		657	9.7874	10.0016		657	10.6632	10.0694
658	10.3015	9.6728		658	9.9036	9.1531		658	9.1423	9.4859		658	10.2253	10.3181		658	10.2827	9.6274
659	10.2689	9.366		659	10.0189	9.7318		659	9.3068	9.5504		659	10.0519	10.9491		659	9.6264	9.4782
660	9.2063	8.896		660	10.8493	9.3588		660	9.3437	9.8746		660	9.5229	9.9971		660	10.4225	10.0637
661	10.5155	9.7448		661	10.0359	9.1533		661	9.0586	9.3025		661	9.9742	10.0382		661	10.0127	9.8857
662	10.7442	9.9342		662	9.9535	8.8025		662	9.4143	9.7285		662	9.7156	10.0725		662	10.175	9.3724
663	10.7359	9.8799		663	9.8089	9.0647		663	9.1539	9.8191		663	9.5528	9.8908		663	9.8439	9.435
664	10.9383	10.1255		664	9.7774	8.9251		664	9.4232	9.8299		664	9.1166	9.4432		664	10.0168	9.7904
665	11.2143	9.8168		665	9.5233	9.0468		665	9.276	9.5201		665	9.6325	9.9313		665	9.952	9.8181
666	11.3599	9.6249		666	10.6574	9.7011		666	9.4514	9.6052		666	9.7011	9.7483		666	9.8793	9.3677
667	11.031	9.7866		667	9.9233	9.2616		667	9.706	9.9607		667	9.2074	9.5765		667	10.0225	9.7516
668	10.1234	9.7277		668	9.8132	9.6145		668	9.2811	9.5208		668	9.6647	9.7324		668	10.0197	10.0685
669	11.2804	9.998		669	10.4341	9.793		669	9.5536	9.9779		669	9.1419	9.1589		669	9.8607	10.0922
670	10.1744	9.2762		670	10.7007	9.4366		670	9.0331	9.7373		670	9.2354	9.7327		670	10.0702	9.6143
671	10.4653	9.7783		671	10.8148	9.7807		671	9.3698	9.7349		671	9.9074	9.9817		671	9.8452	9.2529
672	10.2001	9.779		672	10.3611	9.5396		672	9.3971	9.458		672	9.3224	9.6378		672	9.9615	9.598
673	10.8762	10.087		673	9.8401	9.4284		673	9.799	9.8797		673	9.121	9.6322		673	10.0837	9.799
674	10.4106	9.7137		674	10.1543	9.4619		674	9.3682	9.6579		674	9.5791	9.6135		674	10.0271	9.6913
675	10.5973	9.9792		675	10.1769	9.4192		675	9.1901	9.927		675	9.3643	9.7553		675	10.3645	10.0249
676	11.0289	10.3838		676	9.6999	9.0681		676	9.1201	9.5602		676	9.1125	9.7981		676	9.8959	9.3998
677	10.7443	10.5692		677	10.1196	9.5449		677	9.5071	9.9062		677	9.5259	9.3423		677	10.2058	9.906
678	10.8681	9.9605		678	9.9012	9.1544		678	9.3124	10.1221		678	9.0456	8.9902		678	10.1532	9.7698
679	10.9818	9.492		679	9.7515	9.3324		679	9.518	10.0872		679	9.277	9.382		679	10.0374	9.9487
680	11.3809	9.6556		680	9.8913	9.0415		680	9.1534	9.7923		680	9.2153	9.4297		680	9.5622	9.3276
681	11.3931	9.526		681	9.8376	9.0287		681	9.3028	9.5905		681	9.4099	9.4506		681	9.5145	8.9542
682	10.5732	9.9779		682	9.6136	9.3446		682	9.4827	10.1276		682	9.2982	9.6867		682	9.3904	9.0192
683	10.9911	9.6801		683	9.7531	9.1881		683	10.3084	10.0825		683	9.8783	9.4489		683	9.5989	9.4134
684	10.559	9.4067		684	10.0479	9.1881		684	9.8155	9.7429		684	9.0382	9.2052		684	10.0879	9.2337
685	11.5693	10.0258		685	10.0456	9.0858		685	10.3176	10.4315		685	8.9807	9.2147		685	9.2926	8.9814
686	10.6875	9.6092		686	10.1857	9.4151		686	9.4045	9.7633		686	9.268	9.7018		686	9.5245	8.8501
687	10.8806	9.6512		687	9.7493	9.0612		687	9.5644	9.8761		687	9.266	9.3071		687	9.5194	9.2372
688	11.0352	9.465		688	10.279	9.3313		688	8.9367	9.3238		688	9.412	9.594		688	10.2042	9.3072
689	10.9881	9.574		689	9.5806	8.71		689	9.3004	10.0609		689	9.1719	9.4936		689	9.8647	8.8784
690	10.7188	9.6837		690	9.8029	9.3192		690	9.6346	9.9158		690	9.8533	9.3454		690	9.5436	9.6085
691	11.1725	9.5396		691	10.5944	9.6698		691	9.1508	9.534		691	8.8499	9.0496		691	10.1837	9.7468
692	10.9794	10.0044		692	10.3443	9.7295		692	9.457	10.1149		692	9.1216	9.9139		692	10.0313	9.7324
693	10.8154	9.7597		693	10.7603	9.4652		693	9.2854	9.7085		693	9.0313	9.1045		693	10.4451	10.1207
694	10.4143	9.5754		694	10.5793	9.9213		694	9.4701	9.8331		694	9.7184	9.5896		694	9.9962	9.5945
695	10.5317	9.2017		695	9.8162	8.5374		695	9.316	9.6639		695	9.633	9.6235		695	9.6513	9.3247
696	11.226	9.7398		696	10.5971	9.2113		696	9.9342	10.3456		696	9.9046	9.9789		696	10.2448	9.9344
697	11.1516	9.6497		697	10.9766	9.034		697	9.795	9.788		697	9.5626	9.5526		697	9.6356	9.3767
698	11.4648	9.879		698	10.6625	9.5478		698	9.64	10.0174		698	9.765	9.5631		698	10.2903	9.3476
699	10.7226	9.8309		699	9.8216	9.004		699	9.5596	9.7694		699	9.3048	9.3847		699	9.8547	9.4395
700	11.2076	9.7553		700	10.4601	9.2183		700	9.5828	9.8821		700	9.1261	9.4201		700	9.9106	9.4533
701	11.2889	9.5507		701	10.6259	9.5698		701	8.9773	8.8786		701	9.4121	9.4886		701	10.2508	9.5879
702	10.858	9.6149		702	9.9624	9.361		702	9.4157	9.6511		702	9.023	9.6355		702	9.8238	9.6446
703	11.1349	9.9719		703	10.0204	9.3745		703	9.7868	10.1023		703	9.1921	9.2853		703	10.176	9.6181
704	10.9891	9.5623		704	10.2546	9.3699		704	9.7859	9.5451		704	9.103	9.3198		704	9.8288	9.269
705	10.3993	9.4879		705	10.5938	9.8249		705	9.6446	9.4081		705	9.7026	9.4132		705	9.7939	9.0531
706	10.639	9.3651		706	10.0914	9.4128		706	9.3803	9.6699		706	9.3214	9.4017		706	10.486	10.0731
707	10.7396	9.6946		707	10.7253	9.3934		707	10.0945	9.3422		707	9.4661	9.4009		707	9.8482	9.6101
708	11.4163	10.2748		708	9.9906	9.3458		708	9.9518	9.4941		708	10.0205	9.9461		708	9.7419	9.3187
709	11.4199	10.0154		709	10.0237	9.1669		709	9.6431	9.4356		709	9.4159	9.4615		709	9.8657	9.5772
710	11.4591	9.9719		710	9.695	9.3532		710	9.4122	9.8733		710	9.0647	9.4112		710	9.8752	9.7669
711	11.1258	9.7612		711	10.618	9.2894		711	9.7847	9.6267		711	9.2829	9.9049		711	10.0506	9.0068
712	11.1289	9.7317		712	9.6323	9.0459		712	9.2925	9.5823		712	9.6226	9.3867		712	9.717	9.4741
713	10.6681	9.6925		713	10.293	9.3963		713	9.7127	9.8671		713	9.2895	9.3674		713	9.8157	9.4442
714	10.9499	9.6655		714	10.0965	9.2914		714	9.62	9.7741		714	9.3276	9.7258		714	9.9851	9.2071
715	10.8433	9.8503		715	9.8752	9.188		715	9.334	9.3365		715	9.5111	9.3155		715	8.9497	8.4684
716	10.5431	9.8318		716	9.8384	9.2023		716	9.7648	9.8012		716	10.239	10.0063		716	9.7077	9.2749
717	10.7549	9.9117		717	10.1092	9.6038		717	9.6797	10.1309		717	9.5625	9.4451		717	9.9764	9.7017
718	10.9556	9.7291		718	10.3886	9.3929		718	8.9759	9.3118		718	9.4065	9.3923		718	9.724	9.8284
719	11.3372	9.6764		719	10.3206	9.6696		719	9.0056	9.9396		719	9.3991	9.6996		719	9.8264	8.6665
720	11.0063	9.5928		720	10.1197	9.5893		720	8.755	8.7597		720	10.1142	9.4394		720	9.7074	9.1863
721	10.8966	9.9212		721	10.3743	9.8674		721	9.27	9.3437		721	9.3277	9.1411		721	9.8198	9.3874
722	11.3721	9.8157		722	10.2644	9.552		722	9.2713	9.1358		722	9.7822	9.3528		722	9.3485	9.1782
723	10.5568	9.6456		723	9.8079	8.9236		723	8.961	9.3558		723	10.2369	9.6263		723	9.9371	9.1211
724	11.4816	9.5696		724	9.7038	9.6184		724	9.3307	9.6491		724	9.7634	9.4228		724	10.0316	9.7429
725	11.3881	9.7566		725	10.1432	9.8027		725	9.236	9.2684		725	9.712	9.5755		725	9.9455	8.9727
726	10.9928	9.4714		726	9.6202	8.9589		726	9.2513	9.5679		726	10.0012	9.8922		726	10.0023	9.5512
727	11.0871	9.5745		727	10.0175	9.2901		727	8.8648	9.1441		727	9.4154	9.3461		727	10.5228	9.8723
728	11.8649	9.9079		728	10.4198	9.3997		728	9.4768	9.718		728	9.6406	9.9537		728	10.2154	9.341
729	10.2647	9.8824		729	10.236	9.6813		729	9.6282	9.155		729	9.5177	9.671		729	10.0252	9.5985
730	10.859	9.4866		730	10.4336	9.1126		730	9.7905	9.7378		730	10.1872	9.4292		730	9.7258	9.229
731	10.1655	9.6254		731	10.0523	9.3175		731	9.5671	9.3432		731	10.1079	9.6151		731	10.1952	9.6468
732	10.6236	10.0385		732	10.5331	8.9815		732	9.2592	9.7447		732	9.8498	9.9292		732	9.5052	9.1944
733	11.2835	9.744		733	10.4323	9.8178		733	9.4655	10.0412		733	9.8591	9.7303		733	9.5918	8.7407
734	10.9736	9.6465		734	10.4909	9.3434		734	9.6895	9.375		734	9.2258	9.0896		734	9.5357	8.8762
735	11.1459	9.8274		735	10.4749	9.5512		735	9.7932	9.4421		735	9.9522	9.4771		735	9.5642	8.6928
736	10.8373	9.7123		736	10.4343	9.1715		736	9.4352	9.6264		736	9.2875	9.4803		736	9.9445	8.5792
737	11.2979	9.7972		737	10.9323	9.3495		737	9.1328	9.4631		737	9.763	9.7127		737	9.4936	8.6247
738	10.6437	9.4043		738	10.6766	9.5961		738	8.9467	9.0745		738	9.4609	9.4199		738	9.4987	8.6352
739	10.7773	9.462		739	9.8652	9.3078		739	10.0381	9.271		739	9.9876	9.7847		739	9.597	9.0265
740	10.8137	9.3516		740	10.4889	9.11		740	9.3764	9.5264		740	9.4361	9.5541		740	9.4541	9.0428
741	11.0236	10.212		741	10.2341	9.0844		741	10.0826	10.0867		741	9.6839	9.506		741	9.281	9.3028
742	10.7486	9.6723		742	10.9367	9.719		742	9.6383	9.2763		742	9.6126	9.5382		742	9.7925	9.4033
743	10.7957	9.9254		743	10.4171	9.605		743	9.8069	9.5072		743	9.244	9.56		743	9.2888	9.0459
744	10.6618	9.4655		744	10.7492	9.3103		744	9.808	9.2761		744	9.4617	9.5557		744	9.44	8.9586
745	10.0771	9.5406		745	10.7559	9.6328		745	9.5227	9.759		745	10.0792	10.3384		745	9.3347	9.4579
746	11.6022	9.9689		746	10.3367	9.5199		746	9.6783	9.2574		746	9.3457	9.6775		746	9.3648	8.8006
747	11.1211	9.6597		747	10.6224	9.2339		747	9.5823	9.7587		747	9.6028	10.0647		747	9.5503	8.789
748	10.7018	9.8628		748	10.8564	9.5538		748	9.8599	9.7944		748	9.03	9.954		748	9.5769	9.7287
749	10.8602	9.9947		749	11.5732	10.2601		749	9.4626	9.9704		749	9.5857	9.5161		749	9.1329	9.1078
750	11.2661	9.9636		750	10.8765	9.2775		750	10.1035	9.6059		750	9.373	9.5905		750	9.6289	9.0288
751	10.6459	9.1711		751	10.2222	9.017		751	9.2044	9.8132		751	9.2024	9.5535		751	9.0999	8.6755
752	10.5487	9.5511		752	10.6032	9.2984		752	10.0024	10.0377		752	9.5216	10.1672		752	9.3272	8.7647
753	10.5371	9.6303		753	10.6265	9.5369		753	9.5157	9.4975		753	8.7441	9.3579		753	9.9958	8.9043
754	10.2458	9.1694		754	10.4857	9.2213		754	9.1254	9.742		754	9.6526	9.4057		754	9.316	9.0884
755	10.9797	9.7627		755	10.33	9.5226		755	9.6954	10.0736		755	9.6836	9.5636		755	9.9665	8.9671
756	10.812	10.0371		756	10.2004	9.1767		756	9.1778	9.4913		756	9.2206	9.4224		756	9.9543	9.6265
757	10.4853	9.6402		757	10.4338	9.1919		757	9.567	9.2808		757	9.6925	9.6742		757	9.1454	8.966
758	10.8504	8.8395		758	10.4321	9.1603		758	9.3066	9.3416		758	9.7186	9.6217		758	9.9336	9.008
759	10.6982	9.741		759	10.553	9.5648		759	9.8168	9.6375		759	9.7641	9.5447		759	10.1666	9.5127
760	10.9526	9.8694		760	10.655	9.4007		760	8.7603	8.9334		760	9.7919	9.5337		760	9.9349	9.2207
761	10.7906	9.6086		761	10.4963	9.4361		761	9.6495	9.7214		761	9.4101	9.2957		761	9.5853	9.1667
762	10.486	9.652		762	10.6893	9.4192		762	9.7938	9.6566		762	9.5442	9.4576		762	9.268	8.7196
763	10.4544	9.8135		763	10.7617	9.1827		763	10.0917	9.5591		763	9.5055	9.2287		763	9.7277	9.2685
764	11.4713	10.0063		764	10.567	9.4384		764	9.551	9.8606		764	9.8511	9.4241		764	10.1184	9.2293
765	10.634	9.6298		765	10.6909	9.3125		765	9.8922	9.7477		765	9.7882	9.5653		765	10.0387	9.1598
766	11.2357	10.2649		766	10.7551	9.634		766	10.0443	9.8037		766	9.4609	10.124		766	9.6948	9.0899
767	11.0064	9.5609		767	10.4884	9.1014		767	9.596	9.2709		767	9.5293	9.6145		767	9.8246	9.906
768	11.178	9.7168		768	10.6993	8.9208		768	10.0148	9.978		768	9.1915	9.8468		768	9.8592	9.4578
769	10.5525	9.5134		769	10.7146	9.4739		769	9.6609	9.9564		769	9.1232	9.8464		769	9.6553	9.322
770	10.7525	10.1739		770	10.3992	9.1616		770	9.8311	9.911		770	9.0329	9.6374		770	9.8557	8.886
771	10.6179	9.6218		771	10.593	9.1086		771	9.6652	9.4756		771	8.6321	9.1759		771	9.6006	8.9238
772	10.584	9.6702		772	10.3287	9.021		772	9.8797	9.634		772	8.9331	9.8671		772	9.9415	9.1993
773	11.2732	9.8055		773	10.3648	9.6274		773	9.5118	9.6079		773	9.2544	10.0614		773	9.1933	8.8263
774	10.8025	9.97		774	10.2011	9.2469		774	9.3458	10.021		774	9.1374	9.7243		774	10.319	9.6069
775	10.8728	9.6586		775	10.3745	9.805		775	9.6802	9.7777		775	9.5677	9.679		775	9.9384	9.3746
776	10.8776	10.0528		776	10.7263	9.478		776	9.4575	9.4641		776	8.9495	9.9932		776	9.6139	9.5348
777	10.7493	9.7614		777	9.9286	9.3643		777	9.437	9.74		777	9.6678	10.0109		777	10.0678	9.3907
778	10.4881	10.0143		778	10.0343	9.5447		778	9.656	10.1145		778	9.6768	10.1673		778	10.1216	9.074
779	11.2031	9.9318		779	9.6035	8.8522		779	9.487	9.5398		779	10.0129	10.1959		779	10.2072	9.5439
780	10.3689	9.4453		780	9.672	9.4755		780	10.1485	9.9894		780	9.4585	10.1168		780	9.9654	9.4466
781	11.2969	9.6858		781	10.3893	9.3426		781	9.6037	9.8149		781	9.7135	10.0024		781	10.1114	9.7859
782	10.8499	9.6344		782	10.4138	9.6218		782	9.5953	9.9769		782	9.5452	10.1267		782	9.6941	9.0735
783	10.8599	10.0903		783	10.6615	9.2591		783	9.5403	10.0104		783	9.6034	9.9813		783	10.6383	9.9174
784	10.4071	9.5185		784	9.9233	9.2473		784	9.695	9.6308		784	9.5392	10.6361		784	9.888	9.2497
785	10.4226	9.951		785	9.884	9.0258		785	9.3318	9.1057		785	9.6879	9.9299		785	9.6374	9.3111
786	10.8823	9.6585		786	10.1473	9.259		786	9.5205	9.2008		786	9.2238	9.7485		786	9.7105	9.2235
787	10.684	9.6708		787	10.2375	9.8096		787	9.7683	9.9032		787	9.6847	10.0151		787	10.1402	9.6674
788	10.7718	10.1464		788	10.365	9.4638		788	9.4079	9.4015		788	9.5403	9.6302		788	10.1983	9.2043
789	9.9464	10.0819		789	10.0221	9.4531		789	9.3313	9.4717		789	9.472	9.8051		789	9.9838	9.3448
790	11.1776	10.1218		790	9.8859	9.1829		790	8.7852	9.5254		790	9.2851	9.7378		790	10.3308	9.6536
791	10.7962	9.9405		791	10.033	9.465		791	9.6007	9.4829		791	9.5009	9.4823		791	9.7955	9.3766
792	10.6024	9.9089		792	10.3076	9.9365		792	9.5841	9.9312		792	9.4068	9.7007		792	10.1054	9.4694
793	10.7208	10.3992		793	9.742	9.0325		793	9.4486	9.6514		793	9.518	9.6909		793	10.4527	10.0531
794	11.2364	9.9387		794	9.9194	9.7285		794	9.5722	9.8076		794	10.1283	10.1808		794	10.3763	10.0126
795	10.9171	9.8181		795	9.58	9.3153		795	10.1559	9.4985		795	9.7053	9.9373		795	9.9159	9.6199
796	10.5694	9.8619		796	9.5563	9.3155		796	9.5248	9.4721		796	9.8556	10.361		796	10.0053	9.993
797	10.6882	9.862		797	9.6837	9.1961		797	9.7837	9.8457		797	9.9966	10.1691		797	10.2469	9.7198
798	10.2459	9.8931		798	9.9188	9.0859		798	10.1063	9.8973		798	9.8049	9.9649		798	10.1104	9.4565
799	10.9084	9.9889		799	10.2484	9.6702		799	9.19	9.7312		799	9.3676	9.8146		799	9.6123	8.9051
800	10.4467	10.348		800	10.1638	9.2859		800	9.5632	9.7438		800	9.1905	9.8236		800	10.0021	9.4392
801	10.5872	9.7082		801	10.3346	9.0658		801	9.5361	9.6378		801	9.968	9.9546		801	9.7141	8.7737
802	10.4834	9.7159		802	11.0479	9.7762		802	9.994	9.7311		802	9.3175	9.8849		802	10.2964	9.1542
803	10.8397	10.1894		803	9.6984	9.0278		803	9.5703	9.4865		803	9.1734	9.8156		803	9.8038	9.0614
804	10.9781	9.428		804	10.0097	9.5654		804	9.8705	9.491		804	9.4158	10.0343		804	9.9096	9.497
805	10.8788	9.8207		805	9.9624	9.035		805	9.2622	9.3415		805	9.3111	9.5236		805	10.2805	9.3702
806	10.9573	9.975		806	9.8529	9.4245		806	9.664	9.3687		806	9.1918	10.1951		806	10.4232	9.8314
807	10.8616	9.865		807	10.2779	9.5051		807	9.7936	9.6658		807	9.4254	9.1265		807	10.1391	9.2399
808	10.7464	9.6695		808	10.2344	9.7695		808	10.0375	9.7797		808	9.5996	9.4799		808	9.7521	8.9461
809	11.6226	9.9407		809	10.9064	9.8207		809	9.7323	10.0713		809	9.3475	9.6798		809	10.2279	9.6949
810	10.5346	9.6282		810	9.8473	9.701		810	9.4879	9.1679		810	8.5272	9.1735		810	9.9824	9.0792
811	11.0761	10.0338		811	10.2031	9.4623		811	9.9641	10.2273		811	9.2602	10.0479		811	9.9157	9.1978
812	10.8808	9.6342		812	9.8647	9.5759		812	9.3751	10.096		812	9.0932	10.4706		812	10.0521	9.1613
813	10.7611	9.5505		813	9.9986	9.5461		813	9.578	9.8907		813	9.8676	9.5114		813	10.5641	9.4267
814	10.7206	9.8189		814	9.9964	9.0686		814	9.5455	10.079		814	9.7065	9.7001		814	9.8132	9.7294
815	10.6045	9.753		815	10.2103	9.3466		815	9.5942	9.966		815	9.9563	9.9819		815	10.1234	9.3151
816	11	9.6813		816	10.0186	9.4312		816	9.385	10.2035		816	9.7743	9.6139		816	9.8926	9.3467
817	11.1597	9.8384		817	10.7575	9.2841		817	9.7475	9.8052		817	10.0372	9.4985		817	9.6591	9.4456
818	10.157	10.0708		818	10.036	9.3948		818	9.5071	9.6182		818	9.6763	9.5048		818	9.556	9.0201
819	10.6987	9.9046		819	10.6266	10.0631		819	9.4647	10.1591		819	9.9951	9.9984		819	9.776	8.8936
820	11.0098	9.7412		820	10.3249	9.4481		820	9.3058	9.1834		820	9.9971	9.9426		820	9.6307	9.2222
821	10.8105	9.9733		821	10.1979	9.2671		821	9.4128	9.6332		821	10.2856	9.8477		821	9.699	8.8593
822	10.0848	9.3336		822	9.7583	8.8239		822	9.5178	9.7419		822	10.5955	9.7139		822	10.1037	9.0368
823	10.2943	10.0958		823	10.1344	9.2768		823	9.606	9.6817		823	9.6044	9.2983		823	9.9385	9.6877
824	10.9871	10.1057		824	9.9888	9.3142		824	9.4061	9.7286		824	9.8412	9.4061		824	10.2569	9.5286
825	10.4638	9.7612		825	10.2156	9.2853		825	9.452	9.8639		825	9.8248	9.4346		825	10.0783	9.2704
826	10.9759	10.0049		826	9.964	9.5558		826	9.2346	9.8924		826	9.96	10.1416		826	10.0083	9.1995
827	11.1922	10.1438		827	9.5672	9.1131		827	9.7119	10.2553		827	8.8787	9.1986		827	9.8208	9.2579
828	11.1501	9.9455		828	9.8968	9.5999		828	9.4937	9.7932		828	9.4805	9.5568		828	9.6949	9.2088
829	10.4239	9.9298		829	10.4942	9.6517		829	9.2296	8.7653		829	9.6827	9.7125		829	9.8155	8.9456
830	11.132	9.8784		830	9.6585	9.1487		830	8.9256	9.1689		830	9.7845	9.5835		830	10.1377	9.5121
831	10.6263	9.9292		831	10.2553	9.6794		831	9.3561	9.5556		831	9.8168	9.6902		831	10.5308	9.4013
832	10.8322	9.6683		832	9.8551	9.5881		832	9.3967	9.7759		832	9.9204	9.772		832	9.9305	9.237
833	10.8527	9.7476		833	10.0112	9.4197		833	9.2537	9.4465		833	10.2805	9.975		833	10.374	9.6992
834	10.81	10.0531		834	10.1473	9.4131		834	9.4468	9.6419		834	9.1367	8.8912		834	10.1794	9.6449
835	10.9073	10.3287		835	9.6308	9.5318		835	9.1452	9.8728		835	9.8391	9.8377		835	9.5758	9.06
836	10.5712	9.454		836	9.766	8.8847		836	8.9691	9.2737		836	9.7821	9.6258		836	9.3456	9.1941
837	10.8778	9.9485		837	9.62	9.4597		837	9.6107	9.5031		837	9.8311	9.8508		837	9.9868	9.0709
838	11.0594	9.7032		838	9.691	9.0859		838	9.4965	9.5858		838	10.117	9.7232		838	10.0601	9.2383
839	11.0824	10.1398		839	9.984	9.0271		839	9.8595	10.0023		839	9.9296	9.2103		839	9.854	9.8014
840	10.6939	9.5065		840	9.7381	9.2452		840	9.5829	9.691		840	9.8398	9.6411		840	10.7568	10.196
841	10.3025	9.7612		841	9.6543	9.3585		841	9.3558	9.4139		841	10.0695	9.8625		841	9.9287	9.2942
842	10.9658	10.0471		842	9.4495	9.2492		842	8.8495	9.3957		842	9.601	9.2405		842	10.6476	9.7694
843	11.2406	9.7408		843	10.2488	9.927		843	9.4624	9.5601		843	9.6815	9.578		843	10.3585	9.8589
844	10.842	9.6147		844	9.8167	9.4416		844	10.0828	9.7421		844	9.6625	9.0994		844	10.1088	9.6736
845	11.9247	9.8631		845	9.8215	9.2525		845	9.3127	9.98		845	9.5565	9.5949		845	9.8798	9.3936
846	11.3246	10.189		846	10.1536	9.5305		846	9.1201	9.7359		846	9.7774	9.8475		846	9.9238	9.4485
847	10.2497	9.5911		847	9.8044	9.2965		847	9.2729	9.3707		847	10.0164	9.6084		847	9.8025	9.0895
848	10.0464	9.4396		848	9.579	9.266		848	9.7776	9.7956		848	9.4117	9.4196		848	9.8285	9.394
849	10.0457	9.6959		849	9.721	9.2714		849	9.6483	9.6168		849	10.0018	9.5241		849	9.8593	9.8241
850	10.7123	10.2674		850	9.9497	9.1087		850	9.2244	9.6287		850	9.873	9.6784		850	10.0631	9.3506
851	10.6209	10.2011		851	10.144	9.0131		851	9.1649	9.5893		851	9.6294	9.8187		851	10.4264	9.4762
852	10.1649	9.6535		852	9.8059	9.1611		852	9.251	9.7246		852	9.4711	9.6117		852	10.1945	9.5516
853	10.7486	10.0176		853	9.6314	9.0695		853	9.3571	10.3739		853	9.6788	9.3992		853	10.1313	9.8364
854	10.0574	9.7525		854	9.9186	9.3996		854	9.4694	9.646		854	9.9982	9.9474		854	9.5476	8.9691
855	9.9689	10.1023		855	9.8357	9.1187		855	9.3759	9.7789		855	10.0637	9.4699		855	9.8809	9.4547
856	10.5441	10.0834		856	9.5603	9.1729		856	9.1636	9.428		856	9.6211	9.8064		856	10.0241	9.5459
857	10.2314	9.7848		857	10.1841	9.2696		857	9.4569	9.6602		857	9.2972	9.295		857	10.1041	9.5579
858	10.4414	10.2596		858	10.1471	9.4871		858	9.025	9.1751		858	10.0006	9.8211		858	10.539	9.5872
859	10.1712	10.1491		859	10.271	9.1585		859	9.5267	9.4755		859	10.17	9.5558		859	9.7783	9.4473
860	10.4432	9.7039		860	10.2502	9.3807		860	9.8208	9.7341		860	10.1987	9.8853		860	10.3343	9.3614
861	10.3914	10.1238		861	10.6169	9.6199		861	8.892	9.3242		861	9.8253	9.5684		861	10.0246	9.5302
862	10.1826	10.1851		862	10.0382	9.3895		862	8.9807	9.8029		862	9.4753	9.359		862	9.999	9.3579
863	10.2861	9.8118		863	10.0331	9.3257		863	9.1404	9.7608		863	9.7258	9.3831		863	9.7097	9.3025
864	10.2699	9.7168		864	10.074	9.486		864	9.5476	9.9296		864	9.7396	9.6106		864	10.3735	9.245
865	10.8748	10.038		865	9.7818	8.8379		865	9.3431	9.7287		865	9.7337	9.8673		865	10.2178	9.6547
866	10.0504	9.6322		866	10.3132	9.1219		866	8.7473	9.5018		866	10.1514	10.083		866	9.823	9.026
867	10.2865	9.7422		867	10.5605	9.4475		867	9.4005	10.0945		867	10.2072	10.0755		867	9.5486	9.1206
868	11.0303	10.3339		868	10.4562	9.3953		868	9.5	9.8845		868	10.2657	10.1435		868	10.297	9.64
869	10.6315	10.1439		869	10.1099	9.1933		869	9.4065	9.6623		869	9.612	9.6051		869	9.8576	9.1674
870	10.3839	9.9059		870	10.1306	9.4535		870	9.5594	9.7214		870	10.1614	9.744		870	10.1953	9.1856
871	10.266	9.2025		871	10.2851	9.3964		871	9.5478	9.8489		871	9.6496	9.3935		871	9.849	9.3638
872	11.2983	9.913		872	10.0264	9.5284		872	9.0426	9.623		872	10.1212	9.9634		872	9.8256	9.4244
873	10.1434	9.9565		873	10.2684	9.1358		873	8.7335	9.7246		873	9.9752	9.4259		873	10.301	9.4586
874	10.7261	10.0728		874	9.6923	9.5585		874	9.361	9.8221		874	9.4419	9.3695		874	10.0312	9.8947
875	10.1841	9.9695		875	10.1762	9.8651		875	9.6643	10.061		875	10.0456	9.7957		875	10.0081	9.6547
876	9.8902	9.5867		876	9.8131	9.0383		876	9.6148	10.0006		876	9.566	9.6228		876	9.9893	9.2291
877	9.9723	9.8299		877	10.2205	9.1087		877	9.3746	9.6484		877	10.1321	10.5264		877	10.0424	8.9506
878	10.1461	9.8016		878	10.2015	9.2907		878	9.5611	9.541		878	9.8076	9.5759		878	9.7559	9.1282
879	11.1393	9.9757		879	9.8514	9.0907		879	9.4751	9.8412		879	10.0416	9.3574		879	10.1031	9.4711
880	10.6807	10.0359		880	10.2557	9.5341		880	9.4895	9.8593		880	9.3784	9.1111		880	9.9529	9.435
881	10.5616	10.1368		881	9.8631	9.1667		881	9.8991	10.295		881	9.971	9.7547		881	10.1203	9.445
882	10.6736	9.9258		882	10.1435	9.4505		882	9.767	10.2321		882	9.4235	9.3979		882	9.9617	9.4944
883	10.2478	9.9661		883	9.7198	9.0747		883	9.1147	9.4041		883	9.8292	9.2835		883	10.095	9.6284
884	10.4138	9.8025		884	9.6342	9.3615		884	9.5828	9.9158		884	10.1055	9.8972		884	10.4133	9.4289
885	10.723	9.8837		885	9.6652	8.9173		885	9.9044	9.7649		885	9.6567	9.7441		885	9.7729	9.6353
886	10.7223	9.4836		886	9.8271	9.5405		886	9.3261	9.9816		886	9.0632	9.3927		886	10.2834	9.2212
887	10.3651	9.6524		887	10.2783	9.4159		887	9.3886	9.9796		887	9.7982	9.383		887	10.2137	9.1961
888	10.843	9.7116		888	9.6117	8.9339		888	9.2643	9.7316		888	10.031	10.2529		888	9.6974	9.6741
889	10.5639	9.9726		889	10.3948	9.2006		889	9.105	10.2438		889	10.0194	10.0531		889	10.2093	9.4437
890	10.6099	9.3523		890	10.1788	9.4911		890	9.1693	9.7787		890	10.0161	9.6828		890	9.7898	9.0127
891	10.7654	9.7645		891	9.8073	9.4234		891	8.9367	9.8448		891	9.5541	9.4949		891	9.8719	9.0687
892	10.2047	9.8639		892	9.8907	9.5199		892	9.3177	10.1384		892	9.6289	9.7685		892	9.5421	9.2089
893	10.4663	10.168		893	10.0568	9.3711		893	9.3471	9.8263		893	9.421	9.3227		893	10.2233	9.3254
894	10.3254	10.2369		894	9.9719	9.1937		894	9.0214	9.6692		894	9.1256	9.8488		894	9.9168	8.8265
895	10.408	9.3101		895	9.7792	9.8413		895	9.4122	9.6847		895	9.6772	9.7484		895	10.2288	9.4607
896	10.5356	9.4999		896	10.1844	9.1289		896	9.2884	9.792		896	9.8475	9.764		896	9.7265	9.4511
897	10.8294	9.5186		897	10.1096	8.7826		897	9.5265	10.1377		897	9.805	9.5598		897	9.9827	9.5058
898	10.4717	9.7212		898	9.916	9.7037		898	9.0341	9.4982		898	9.896	9.9254		898	9.785	8.8784
899	10.9742	9.7815		899	10.0714	9.5188		899	9.3882	9.395		899	9.9775	9.4798		899	9.7904	9.1929
900	10.3302	9.8601		900	9.7294	9.3005		900	9.4492	9.8234		900	9.644	9.7455		900	10.2068	9.3412
901	10.2878	9.7779		901	9.9111	9.4121		901	9.3535	10.0774		901	9.7731	9.8821		901	10.1541	9.5144
902	9.8392	9.2426		902	9.7813	9.3311		902	9.5375	10.4223		902	9.7889	9.2502		902	10.561	9.5181
903	10.2171	10.2333		903	9.6327	9.3925		903	9.5709	10.1506		903	9.5149	10.1973		903	10.1279	9.4026
904	10.4455	9.4696		904	9.9635	9.5096		904	9.076	9.5647		904	9.7199	10.4044		904	10.0087	9.3149
905	10.827	10.0934		905	9.7102	9.4451		905	9.4137	9.7159		905	10.1556	9.8947		905	10.1803	10.1283
906	10.3697	9.8145		906	9.905	9.3926		906	9.4287	9.799		906	9.8035	9.8322		906	10.3223	9.6994
907	10.2172	9.9723		907	10.1065	8.8983		907	9.52	9.9385		907	10.3999	9.8957		907	10.1023	9.3463
908	10.4375	9.7396		908	9.7781	9.2926		908	9.5191	9.6896		908	9.297	9.4883		908	9.9867	9.6412
909	10.2119	9.5894		909	9.9725	9.1826		909	9.7302	10.33		909	10.2497	9.6713		909	9.9862	9.7061
910	10.4685	9.6406		910	9.9204	9.2736		910	9.5416	9.8953		910	9.7445	9.2821		910	9.9386	9.9565
911	10.5421	10.0022		911	10.0065	9.4597		911	9.3034	9.6382		911	9.4148	9.4033		911	10.0125	8.8695
912	10.3232	9.672		912	10.1371	8.9329		912	9.6773	10.3931		912	10.2308	9.9736		912	10.4158	9.8084
913	10.1368	9.7438		913	10.3742	9.0277		913	9.5512	9.7313		913	9.9051	9.8049		913	10.0214	9.3905
914	10.379	9.8643		914	10.2901	8.8938		914	9.668	9.9104		914	10.6153	9.9663		914	9.6937	9.5019
915	10.5131	9.5684		915	9.6962	9.3003		915	9.3694	9.5708		915	9.4084	9.3404		915	10.0315	9.6435
916	10.3423	9.6021		916	9.4567	9.275		916	9.1544	9.5249		916	9.5517	9.745		916	10.3421	9.4529
917	9.7319	9.4525		917	9.6988	9.4388		917	8.9676	9.4527		917	9.8887	9.5963		917	9.702	9.3012
918	10.3574	10.3001		918	10.0046	9.5244		918	9.4472	9.6898		918	9.8109	10.2339		918	10.053	9.5578
919	10.4003	10.2334		919	9.902	9.3407		919	9.2727	9.8149		919	9.5936	9.3529		919	10.0762	9.2955
920	10.518	10.0399		920	10.3477	9.3458		920	9.3503	9.3655		920	9.3819	9.3282		920	9.7853	9.3242
921	9.9973	9.9459		921	10.0508	9.2936		921	8.901	9.7445		921	9.73	9.7252		921	10.4657	9.4401
922	10.2336	9.9766		922	10.2361	9.0985		922	9.0858	9.1416		922	9.6725	9.9122		922	10.9374	9.2845
923	10.2395	9.7406		923	9.2686	9.1929		923	9.7749	9.7255		923	9.9404	9.1026		923	10.0528	9.6004
924	10.7764	10.2649		924	10.0229	9.5602		924	8.9036	9.0546		924	10.1931	9.3872		924	9.9185	9.3473
925	10.0116	10.1122		925	10.2068	9.5057		925	9.1749	9.587		925	10.4492	9.6142		925	10.901	9.2597
926	10.3328	10.0016		926	10.0241	9.3714		926	9.6249	9.5243		926	10.0182	9.5967		926	10.7079	9.281
927	10.1361	10.1974		927	10.1902	9.1241		927	9.4528	9.0131		927	9.8959	9.4031		927	10.8826	9.3349
928	10.4721	10.0778		928	9.9514	9.3529		928	9.3528	9.3401		928	9.7815	9.5761		928	9.8911	9.7816
929	10.7601	9.5225		929	9.5665	9.368		929	8.9145	9.0653		929	9.6428	9.3299		929	10.569	9.3854
930	10.286	10.2411		930	10.1178	9.2628		930	8.9967	8.964		930	10.1455	10.0209		930	10.1778	9.1474
931	10.6997	10.0301		931	10.0588	9.6132		931	9.1084	9.5306		931	9.9383	9.7701		931	9.55	8.6414
932	10.875	10.4032		932	9.7953	9.2496		932	9.907	10.0677		932	10.181	9.6845		932	9.356	8.6841
933	10.2296	10.0917		933	9.7339	8.686		933	9.2428	9.3194		933	9.986	9.9633		933	9.8748	9.1599
934	10.1579	9.7969		934	9.5216	9.5095		934	9.3277	9.6612		934	10.2401	10.0681		934	9.7536	9.2272
935	11.0572	9.7513		935	10.1874	9.8318		935	9.5257	9.5436		935	9.8711	9.9663		935	10.4172	9.1108
936	10.2758	9.836		936	10.0721	9.0495		936	9.2266	9.4375		936	9.9527	9.916		936	9.5747	8.8624
937	10.0101	9.519		937	10.2609	9.5246		937	9.5854	9.8115		937	9.9486	9.7173		937	10.4475	9.5464
938	10.2056	9.9866		938	10.2879	9.5015		938	9.4644	8.8544		938	9.9137	9.9587		938	9.8038	9.0914
939	10.4474	10.0404		939	10.2172	9.6032		939	9.8728	9.8805		939	9.7668	9.5371		939	10.6168	9.1471
940	10.0318	9.9379		940	9.8684	9.2889		940	8.9346	9.1272		940	9.7908	9.5152		940	10.2314	9.4998
941	10.2376	10.0859		941	10.236	9.4325		941	9.6553	9.9761		941	10.1964	10.0214		941	10.3318	9.7896
942	10.6469	10.5804		942	10.1401	8.9495		942	9.5241	9.5329		942	10.1991	10.0901		942	9.754	9.5625
943	10.4596	9.9123		943	10.4502	9.034		943	9.6358	9.7895		943	9.7924	10.109		943	9.9338	9.358
944	10.2652	9.9864		944	10.1025	9.0797		944	9.6872	10.0263		944	9.7087	10.0572		944	9.7479	9.1272
945	10.3831	10.2338		945	10.8014	9.2867		945	8.9351	9.0959		945	10.0526	9.8893		945	10.2339	8.9403
946	10.0749	9.9908		946	10.1073	9.1984		946	9.3877	9.665		946	9.5991	9.3212		946	9.4417	8.9651
947	10.204	10.079		947	10.5936	9.0968		947	9.4135	9.5101		947	10.1684	9.3097		947	10.0379	9.0323
948	10.5649	10.0257		948	10.3565	9.356		948	9.9675	9.9641		948	10.0491	10.0222		948	9.9851	9.3129
949	10.4868	10.2257		949	10.833	9.1874		949	9.4648	9.8505		949	10.1376	9.6427		949	10.2441	9.1539
950	10.2178	9.9247		950	10.7733	9.2091		950	9.0275	9.5801		950	9.9428	9.7981		950	10.0552	8.9909
951	10.6831	9.9754		951	11.072	9.2423		951	9.4128	9.5983		951	10.1177	9.9106		951	10.265	9.1323
952	10.3855	10.0248		952	11.0617	9.4666		952	9.4074	10.0269		952	10.1781	10.2618		952	10.0358	9.3521
953	10.7657	10.0378		953	10.3857	9.0716		953	10.0932	9.7559		953	10.3896	9.9609		953	10.2484	9.176
954	10.2801	10.1139		954	11.2918	9.743		954	9.6442	10.4486		954	10.1553	10.1522		954	10.1352	9.2793
955	11.1277	9.9564		955	9.9823	8.5533		955	9.2462	10.1272		955	10.0725	9.8128		955	10.1547	9.2983
956	10.5413	9.8053		956	10.3712	8.7359		956	9.3514	9.675		956	10.0183	9.5962		956	10.0402	9.4137
957	11.0295	10.0768		957	10.1314	9.0018		957	9.5706	9.8794		957	9.9374	9.4391		957	10.2225	9.1221
958	10.5721	9.7148		958	9.7818	8.5459		958	9.5719	9.7642		958	10.101	10.1308		958	10.8417	9.6489
959	11.0014	10.1223		959	10.198	8.6963		959	9.5898	9.6953		959	9.9903	9.7731		959	10.8195	9.718
960	10.4528	9.9932		960	10.68	9.1165		960	9.6309	9.8209		960	9.5152	9.5111		960	10.1466	9.1263
961	10.5532	10.0246		961	10.0453	9.1584		961	10.0404	10.1955		961	9.9297	9.4174		961	10.5942	9.428
962	11.0058	9.7303		962	9.6292	8.5123		962	9.5766	9.7363		962	9.7348	10.1047		962	10.7925	9.4965
963	10.5269	9.9243		963	10.0232	9.2062		963	9.476	9.3135		963	9.7344	9.6754		963	10.7769	9.7044
964	10.8054	10.3605		964	10.1066	9.1841		964	9.1214	9.5525		964	9.7889	9.8631		964	10.5737	9.4483
965	11.0668	10.299		965	10.425	9.2502		965	8.9096	9.4569		965	9.674	9.8389		965	9.9093	8.947
966	10.2183	9.7841		966	10.358	9.1947		966	9.5057	10.2248		966	9.9062	9.9089		966	10.5842	9.355
967	10.7454	10.05		967	10.4219	9.1818		967	8.8524	9.6824		967	9.7051	10.0951		967	10.4166	9.3799
968	10.2852	9.9992		968	10.776	9.3428		968	9.4693	9.8405		968	10.1678	10.0673		968	10.2486	9.3688
969	10.6224	10.4259		969	11.5518	9.9055		969	9.2401	9.4892		969	10.1459	10.261		969	10.7716	9.4796
970	10.5216	10.1493		970	10.4957	9.0418		970	9.3003	9.5839		970	10.3747	10.2358		970	9.8311	8.962
971	10.7671	10.2589		971	10.5654	9.5444		971	9.2654	9.808		971	10.3126	9.9633		971	10.3928	9.7108
972	10.4158	9.876		972	10.7361	9.4475		972	8.8408	9.2571		972	10.3445	9.6967		972	9.966	8.8772
973	10.5938	10.2041		973	10.6136	8.9349		973	9.3464	9.6515		973	10.0616	9.8143		973	10.2006	9.5187
974	10.4309	9.7577		974	11.2763	9.5486		974	9.0846	9.5519		974	10.1248	9.6756		974	10.3612	9.4348
975	10.0876	10.0832		975	10.8381	9.1418		975	9.3239	9.6121		975	9.8758	9.7535		975	10.2115	9.2007
976	11.1462	10.4524		976	11.1141	9.6096		976	9.2243	9.5891		976	9.5103	9.3684		976	9.913	9.1723
977	10.6154	9.9416		977	10.7665	9.4347		977	9.46	9.6016		977	9.9953	10.1694		977	10.1459	9.0936
978	10.5747	10.1564		978	10.7677	9.2528		978	9.1408	9.4269		978	10.1647	10.3126		978	10.1803	9.089
979	10.5281	10.1771		979	10.8181	9.7519		979	9.2011	8.935		979	10.0481	9.7376		979	9.6411	8.9395
980	10.5374	10.267		980	10.7447	9.239		980	9.8171	9.6059		980	10.0888	9.4906		980	10.5596	9.2753
981	10.3892	9.7831		981	10.6948	9.0109		981	8.9734	8.9436		981	9.8425	9.4348		981	10.4879	9.477
982	9.6991	9.8559		982	10.8033	9.3167		982	9.409	9.7987		982	9.9427	9.5459		982	10.0167	9.6106
983	10.0829	10.0308		983	10.8432	9.4148		983	9.1243	9.0093		983	9.481	9.704		983	10.2535	9.5892
984	10.4522	10.0803		984	10.4939	9.2816		984	9.5311	9.5162		984	10.2177	10.0721		984	10.2822	9.2018
985	9.944	10.1776		985	10.6813	9.5472		985	8.6973	8.7263		985	9.4518	9.375		985	10.3237	9.5823
986	10.3275	10.0474		986	10.8501	9.2227		986	9.0651	9.3922		986	9.4763	9.6006		986	10.104	9.4187
987	10.6256	9.8192		987	10.7037	9.4937		987	8.7793	8.8512		987	10.0364	9.806		987	10.2137	9.1967
988	10.1025	9.9144		988	10.4823	8.9933		988	9.1441	9.1508		988	9.3247	9.4647		988	10.2671	9.2216
989	9.8956	9.8742		989	10.1092	8.6603		989	9.3343	9.3178		989	9.4426	9.2655		989	10.3505	9.2134
990	10.3535	10.4379		990	10.6135	8.8081		990	9.679	9.3019		990	9.6102	9.2231		990	10.3632	9.3568
991	10.5366	10.0937		991	10.7306	8.7036		991	9.7747	9.5787		991	9.2772	10.099		991	10.982	9.3834
992	10.1856	9.9438		992	10.9209	8.5625		992	9.3368	9.7321		992	9.9141	10.1613		992	10.5087	9.4802
993	10.3168	10.4328		993	10.2211	8.5731		993	8.8678	9.1585		993	9.6637	9.4539		993	10.093	9.4854
994	10.038	9.479		994	10.5333	8.8438		994	9.3483	9.2776		994	9.1847	9.2961		994	10.2028	9.2607
995	10.3216	10.0546		995	10.724	9.1753		995	9.4229	9.424		995	9.9075	9.4659		995	10.0957	9.0238
996	10.4853	9.8356		996	10.7155	9.0948		996	9.1229	8.916		996	10.1829	9.9278		996	9.6266	9.2735
997	10.8114	10.1429		997	10.6383	8.8619		997	9.0103	8.7449		997	9.4575	9.2193		997	10.2382	9.4764
998	10.4488	10.1777		998	10.5202	8.695		998	9.1246	8.8722		998	10.1766	9.8777		998	9.9626	9.2428
999	10.4519	9.9181		999	10.3025	8.493		999	9.9726	9.6176		999	9.8411	9.7425		999	10.1511	9.2466
1000	10.0817	9.6662		1000	10.8281	9.3018		1000	9.7566	9.4791		1000	10.2881	9.5912		1000	9.435	8.9406
1001	10.4995	9.8072		1001	10.6029	8.8523		1001	9.3305	9.5052		1001	10.0657	9.5904		1001	9.9732	8.9428
1002	10.3212	9.4881		1002	10.2613	9.0459		1002	9.3694	9.6047		1002	9.808	9.2498		1002	10.1599	9.6174
1003	10.2563	9.9578		1003	11.0633	9.1992		1003	9.8397	9.9736		1003	9.7893	9.4752		1003	10.276	9.6269
1004	10.0082	9.9007		1004	11.0208	9.347		1004	9.8193	9.4804		1004	9.97	9.8111		1004	9.9806	9.6394
1005	10.0187	9.6679		1005	10.755	9.3666		1005	9.951	10.3601		1005	9.8249	9.4147		1005	10.1672	9.6183
1006	10.3843	10.1311		1006	10.7211	9.0742		1006	9.9028	9.6508		1006	9.6443	9.6244		1006	9.8854	9.059
1007	10.2018	9.9756		1007	10.1659	8.9465		1007	9.8362	9.993		1007	10.0387	10.301		1007	9.9754	9.2811
1008	10.7295	10.1806		1008	10.4953	9.5801		1008	9.3434	9.3893		1008	9.7237	10.1907		1008	10.7037	9.8506
1009	10.7404	10.1572		1009	10.0791	9.0512		1009	9.9213	9.8016		1009	9.8374	9.9285		1009	10.874	9.5635
1010	10.7924	10.2048		1010	10.1701	9.2184		1010	9.498	9.9367		1010	9.5196	9.4482		1010	10.4288	9.5252
1011	11.0181	10.1174		1011	10.1016	9.3986		1011	10.0199	9.9434		1011	9.94	9.5099		1011	10.338	9.656
1012	10.9445	9.9538		1012	10.7992	9.6064		1012	9.5399	9.3695		1012	10.151	10.1029		1012	10.3994	9.2703
1013	10.7404	9.9004		1013	10.1881	9.3377		1013	9.906	9.7863		1013	9.7003	9.6983		1013	9.7777	9.0215
1014	10.6469	10.0318		1014	10.4579	9.3841		1014	9.7831	10.3633		1014	9.9197	10.0565		1014	9.7432	9.3909
1015	10.5894	9.8746		1015	10.2179	9.0809		1015	9.6414	10.2727		1015	9.5737	9.3485		1015	10.2132	9.1941
1016	11.0041	9.9152		1016	9.6568	9.1158		1016	9.4059	10.153		1016	9.3561	9.5503		1016	10.332	9.2703
1017	10.5992	10.2869		1017	10.6771	9.465		1017	9.5161	10.0174		1017	10.0684	10.0062		1017	10.3446	9.8345
1018	10.2153	9.853		1018	10.3922	9.3579		1018	9.8711	10.3188		1018	9.1216	9.3791		1018	9.8705	8.9587
1019	10.3873	10.1756		1019	10.2763	9.2744		1019	9.5528	10.0994		1019	9.8386	9.6576		1019	9.7292	8.9282
1020	10.7157	9.9863		1020	10.2481	9.0389		1020	9.6259	10.4464		1020	9.8532	9.9142		1020	10.1883	9.1962
1021	10.81	9.881		1021	10.6012	9.6203		1021	9.4705	9.9321		1021	9.722	9.907		1021	10.1288	9.6909
1022	10.4009	10.3178		1022	10.1931	9.1558		1022	9.0728	9.8968		1022	10.1686	10.3067		1022	10.238	9.1684
1023	11.0856	9.7076		1023	10.4422	9.209		1023	9.1137	9.9368		1023	10.0329	9.9807		1023	9.653	9.0619
1024	11.1197	9.8043		1024	10.5137	9.11		1024	9.5987	9.7113		1024	9.7989	9.6065		1024	10.9269	9.6752
1025	10.4717	10.2772		1025	10.6704	9.3792		1025	9.3494	9.8522		1025	10.48	9.6512		1025	9.9116	9.4499
1026	10.5339	9.7677		1026	10.5534	9.1258		1026	9.6175	9.8783		1026	9.8153	9.2911		1026	10.1153	9.3638
1027	10.7154	10.2162		1027	10.8506	9.4711		1027	9.1932	9.8413		1027	9.9104	9.6472		1027	10.6232	9.4617
1028	10.5713	10.0352		1028	11.3388	9.5274		1028	9.4051	9.9615		1028	10.6217	9.7701		1028	10.3253	9.6017
1029	10.8139	10.3823		1029	11.2705	9.4321		1029	9.8726	9.9967		1029	10.4432	9.9592		1029	11.1121	9.7357
1030	10.2822	9.8889		1030	10.0964	9.4391		1030	9.8746	10.1251		1030	10.1745	9.6765		1030	10.9312	9.5602
1031	10.2321	9.4401		1031	10.6361	9.8603		1031	9.5256	9.7975		1031	10.0956	9.6632		1031	10.268	9.6236
1032	10.4594	9.5917		1032	9.9609	8.8266		1032	9.0644	9.1131		1032	10.3567	9.3066		1032	10.407	10.086
1033	10.4318	9.86		1033	10.5548	9.442		1033	9.7862	10.2119		1033	10.0608	9.6671		1033	10.5483	9.7861
1034	10.6055	10.425		1034	10.7659	9.2836		1034	9.9101	10.1098		1034	10.2958	9.6668		1034	10.8002	9.9982
1035	10.4086	10.4183		1035	10.2542	9.3686		1035	10.0512	9.7402		1035	10.0266	9.6771		1035	10.7827	10.2768
1036	10.5688	9.8122		1036	10.0618	9.0515		1036	9.4504	9.6088		1036	10.1561	9.7011		1036	11.0194	9.9325
1037	10.4772	9.6669		1037	10.5201	9.0328		1037	9.7484	10.3431		1037	9.8932	9.6264		1037	10.1478	9.795
1038	10.8156	10.5727		1038	10.5517	8.6773		1038	9.3717	9.326		1038	9.9677	9.4907		1038	10.1182	9.8126
1039	10.7308	9.8962		1039	10.2906	8.9338		1039	9.7802	10.2054		1039	9.885	9.6628		1039	10.0807	9.3152
1040	10.2959	10.7042		1040	10.9187	9.0987		1040	9.4725	9.8734		1040	9.8611	9.6331		1040	10.8768	9.5727
1041	10.1289	9.9422		1041	10.5112	9.3229		1041	9.5116	9.6191		1041	10.2032	9.7619		1041	11.3881	10.033
1042	10.3968	10.3078		1042	10.8035	9.2801		1042	9.5672	10.2772		1042	10.1733	9.87		1042	10.6817	9.3872
1043	11.0436	10.3756		1043	10.7481	9.0523		1043	9.4927	10.0363		1043	9.932	10.1927		1043	10.763	9.6735
1044	10.1453	10.0033		1044	11.2671	9.5129		1044	9.8218	9.6401		1044	9.8717	9.4606		1044	10.6369	9.729
1045	10.2165	9.9364		1045	10.4376	9.0748		1045	9.478	9.8774		1045	9.5087	9.6158		1045	10.977	9.831
1046	10.4776	10.3414		1046	10.2741	8.8317		1046	9.5054	9.8301		1046	9.6108	9.5051		1046	11.3429	9.5038
1047	9.7141	10.2715		1047	10.6434	9.1539		1047	9.7785	10.2805		1047	9.9272	9.8791		1047	10.1795	9.465
1048	10.2861	9.9902		1048	10.3942	9.092		1048	9.7272	9.916		1048	10.2973	9.8601		1048	10.8058	10.1744
1049	9.8176	9.3032		1049	10.203	9.2025		1049	10.1118	10.1054		1049	9.8552	9.8696		1049	11.5143	9.9858
1050	10.3676	10.6749		1050	10.0556	9.4044		1050	10.2308	10.4261		1050	9.7635	9.8491		1050	10.9506	9.284
1051	10.4285	9.9923		1051	9.8262	9.1441		1051	9.6939	9.7854		1051	10.1444	9.4318		1051	10.3543	9.2731
1052	10.6178	9.9752		1052	10.8916	9.231		1052	9.4551	10.1992		1052	10.021	9.5251		1052	10.6245	9.5149
1053	10.0058	10.2096		1053	10.3511	9.0419		1053	9.4811	9.8836		1053	9.2369	9.7676		1053	11.1984	9.9804
1054	9.8737	10.2039		1054	10.5397	9.2463		1054	9.2394	9.5237		1054	10.1807	9.7882		1054	10.7081	9.777
1055	9.6232	10.0165		1055	10.0839	9.059		1055	9.7298	10.242		1055	10.1632	9.9138		1055	10.8813	9.4438
1056	9.9777	9.9133		1056	10.3184	9.3258		1056	9.685	10.0865		1056	10.0866	9.8671		1056	10.7756	9.2991
1057	9.928	10.5304		1057	11.251	9.8259		1057	9.8868	10.2499		1057	9.1991	9.1507		1057	10.6263	9.4581
1058	9.6517	10.0191		1058	9.8714	8.98		1058	10.0694	10.0588		1058	9.8085	9.4329		1058	9.5396	8.5018
1059	10.3205	10.2589		1059	10.4194	9.3795		1059	9.7444	10.3669		1059	9.8188	9.3636		1059	10.7897	9.5493
1060	9.5062	9.7202		1060	10.7036	9.966		1060	10.1825	10.3084		1060	9.4286	9.4164		1060	9.9078	9.4155
1061	10.0924	10.0675		1061	10.5444	9.6064		1061	10.0421	10.3325		1061	10.1424	9.585		1061	9.464	8.9981
1062	10.255	10.4824		1062	10.9099	9.9077		1062	9.486	9.6493		1062	9.7284	8.9212		1062	9.7065	9.0946
1063	10.3463	10.4083		1063	10.536	9.2702		1063	9.6211	10.0077		1063	9.8826	9.8858		1063	10.1737	9.6125
1064	10.1579	9.7295		1064	10.3167	8.8558		1064	9.9535	10.2137		1064	10.1131	9.7158		1064	10.3462	9.5022
1065	10.3429	10.1742		1065	10.6766	9.4539		1065	10.1294	9.6487		1065	9.8236	9.8024		1065	10.0745	9.8562
1066	9.9948	9.9385		1066	9.9137	9.4832		1066	9.762	9.7742		1066	9.7415	9.9537		1066	10.2834	9.5326
1067	10.4445	10.174		1067	9.8933	9.4842		1067	10.0533	10.0675		1067	9.225	9.2133		1067	10.356	9.5863
1068	10.1923	10.305		1068	9.6365	8.8437		1068	9.9634	10.1589		1068	9.7451	9.4937		1068	10.4177	9.7504
1069	10.1302	9.8663		1069	9.9595	9.5173		1069	9.7572	9.4777		1069	10.3462	10.0113		1069	10.5206	10.289
1070	10.057	9.8442		1070	10.0514	9.3242		1070	9.7915	9.6612		1070	10.2489	9.3543		1070	10.291	9.8898
1071	10.0218	9.9172		1071	10.3629	9.5139		1071	9.7032	10.1275		1071	9.8977	9.9615		1071	10.2588	9.8634
1072	9.9075	9.8953		1072	10.0006	8.9097		1072	9.555	9.5828		1072	9.823	9.5113		1072	9.849	9.9256
1073	9.2281	9.6195		1073	10.4009	9.3437		1073	9.958	9.9657		1073	10.3346	10.3111		1073	10.2438	10.0801
1074	10.2514	9.9443		1074	10.1872	9.2811		1074	9.8976	9.6249		1074	9.4989	9.7528		1074	10.7296	10.024
1075	10.4997	10.13		1075	10.0598	9.5783		1075	10.3611	9.8162		1075	9.4758	9.2258		1075	10.4181	9.7269
1076	10.3599	10.5726		1076	10.0229	9.6739		1076	10.1921	9.9001		1076	9.8026	9.6586		1076	10.5129	9.6919
1077	10.2454	9.8994		1077	10.1139	9.1543		1077	9.8379	9.4011		1077	9.7686	10.0608		1077	10.1749	9.7636
1078	10.6169	10.2269		1078	9.8087	9.4277		1078	10.5231	9.7321		1078	9.8684	9.5516		1078	10.0764	9.7257
1079	10.5478	10.521		1079	10.28	9.3374		1079	10.0697	10.2971		1079	10.0958	10.0994		1079	10.4055	9.8166
1080	10.1678	9.8866		1080	9.7314	9.2459		1080	10.4631	9.8826		1080	9.7645	9.5491		1080	9.5533	9.2897
1081	10.4857	9.9394		1081	10.3339	9.3739		1081	10.0479	9.8945		1081	9.7815	9.5267		1081	10.2516	9.4116
1082	10.4995	10.4434		1082	10.9701	9.9654		1082	9.7591	9.5625		1082	10.079	9.7269		1082	10.3494	9.8017
1083	10.3639	9.8526		1083	10.7187	9.4694		1083	9.4377	9.1656		1083	9.977	9.6731		1083	9.9682	9.5891
1084	10.8174	10.362		1084	10.2854	9.3269		1084	9.79	10.1036		1084	10.1362	9.8858		1084	10.0015	9.5082
1085	10.7678	9.828		1085	10.8023	9.6255		1085	9.6816	9.5471		1085	9.9113	9.7397		1085	10.0247	9.0913
1086	10.5803	10.0586		1086	10.5061	9.8022		1086	8.9676	9.1216		1086	9.9308	9.6887		1086	9.9967	9.6613
1087	11.0195	10.1435		1087	10.3241	9.8994		1087	9.5508	9.6404		1087	10.0971	9.771		1087	9.5786	9.5076
1088	10.5418	10.1274		1088	9.854	9.5292		1088	9.7347	9.6964		1088	10.3061	9.9365		1088	10.0581	9.4363
1089	10.3814	10.3333		1089	9.7782	9.3908		1089	9.382	9.2789		1089	9.8604	9.5764		1089	10.0535	9.8074
1090	10.4545	10.6352		1090	10.6118	9.8573		1090	9.7491	9.57		1090	10.0305	10.1689		1090	10.7352	9.6079
1091	10.9157	10.3803		1091	10.773	9.2572		1091	10.0722	10.4498		1091	9.921	10.0311		1091	10.4053	9.5732
1092	10.9448	10.1056		1092	10.5468	9.7136		1092	9.9917	9.9045		1092	9.7034	9.3504		1092	10.6784	9.616
1093	10.3131	10.5148		1093	10.8905	9.8452		1093	10.0454	10.2224		1093	10.4625	9.8839		1093	10.2614	9.5823
1094	10.2958	9.9803		1094	10.7117	9.5958		1094	9.7093	10.0875		1094	9.7932	9.6503		1094	10.2151	9.5621
1095	10.8786	10.284		1095	10.385	9.6467		1095	10.0507	10.323		1095	10.1703	9.8148		1095	10.582	9.7562
1096	10.7722	10.2419		1096	10.8425	9.2933		1096	10.4409	10.4348		1096	9.5201	9.7174		1096	9.7847	9.3212
1097	10.4797	10.1748		1097	10.7057	10.741		1097	10.5264	10.2435		1097	9.7942	9.8072		1097	10.4161	9.4425
1098	9.841	9.5645		1098	10.8396	9.8921		1098	10.3144	10.1283		1098	10.4014	9.8092		1098	9.8743	9.7624
1099	10.522	9.6036		1099	10.6428	9.5537		1099	10.2034	10.3303		1099	9.5842	9.29		1099	10.5077	9.8152
1100	10.3766	10.5429		1100	11.0818	10.0377		1100	10.3296	10.3478		1100	9.5277	9.5317		1100	9.8986	8.903
1101	10.335	9.8719		1101	10.4096	9.4834		1101	10.4357	9.8712		1101	9.6925	9.3985		1101	10.3977	9.3918
1102	10.1219	10.5759		1102	11.2004	9.6108		1102	10.189	10.1516		1102	10.0432	9.4611		1102	10.7418	9.6572
1103	10.509	10.3838		1103	10.218	9.5763		1103	9.9261	9.92		1103	10.2119	10.1396		1103	10.2291	9.3883
1104	10.3265	9.7666		1104	10.1878	9.7213		1104	10.3121	10.0699		1104	10.1941	9.8139		1104	10.8486	9.8471
1105	10.3144	10.0719		1105	9.8929	9.5636		1105	9.8687	9.5679		1105	10.123	9.7457		1105	10.4543	9.382
1106	10.0045	9.7744		1106	9.6552	9.5683		1106	10.3594	10.4403		1106	9.663	9.6384		1106	10.8449	9.8219
1107	10.5484	9.9775		1107	10.0174	9.5469		1107	10.1628	10.0982		1107	10.2059	9.7568		1107	10.303	9.4261
1108	10.5386	10.2196		1108	10.4	9.7025		1108	9.7242	9.4459		1108	9.7859	9.7021		1108	11.3766	9.6335
1109	10.1678	10.1319		1109	9.967	9.5191		1109	10.1562	9.585		1109	9.7215	9.6358		1109	11.4478	9.6827
1110	10.2086	9.4627		1110	10.2257	9.7075		1110	9.4652	9.4464		1110	9.7282	9.5904		1110	10.6296	9.522
1111	10.1905	9.8931		1111	9.9389	9.0546		1111	9.9994	10.1157		1111	8.856	9		1111	10.3974	9.6295
1112	10.3308	9.8025		1112	10.0483	9.3031		1112	9.6869	10.2353		1112	9.7335	9.9039		1112	10.7709	9.4167
1113	10.3872	10.0966		1113	10.6698	9.3398		1113	9.8399	10.0427		1113	10.4403	10.2973		1113	10.378	9.2905
1114	9.7039	9.6532		1114	10.1709	9.1581		1114	10.1161	10.3158		1114	9.8748	9.8133		1114	10.2938	9.8388
1115	9.9101	9.9164		1115	10.0059	8.9402		1115	9.8948	10.3471		1115	9.9262	9.9267		1115	10.4818	9.7721
1116	10.3471	9.7635		1116	10.3798	9.02		1116	9.6338	9.7698		1116	9.6815	10.1299		1116	10.3432	9.5424
1117	10.3604	9.7602		1117	9.9365	8.9134		1117	9.7509	9.793		1117	9.9701	9.6593		1117	10.7563	9.8273
1118	9.9699	9.6928		1118	10.4649	9.5019		1118	9.8357	9.612		1118	9.4043	9.1801		1118	10.704	9.3948
1119	9.888	10.2245		1119	10.1174	9.317		1119	10.1977	10.0635		1119	9.5575	9.0596		1119	10.1385	8.9614
1120	10.1663	9.775		1120	10.052	9.0715		1120	9.7339	10.0114		1120	9.1017	9.1701		1120	10.8097	10.0497
1121	10.1777	9.6616		1121	10.0105	9.2831		1121	9.5146	9.5946		1121	9.7032	9.4443		1121	10.7168	9.7544
1122	9.5643	9.6256		1122	9.9113	9.1605		1122	9.5293	10.0064		1122	9.6776	9.5257		1122	10.4679	9.622
1123	10.3619	9.8907		1123	10.0448	8.8127		1123	9.8703	9.7602		1123	9.7542	9.7455		1123	10.7572	9.7459
1124	10.3232	10.0556		1124	9.8257	9.1414		1124	9.7144	10.2751		1124	9.5827	9.3092		1124	10.4296	9.5276
1125	10.3404	10.4053		1125	10.6082	9.4503		1125	10.1706	10.1122		1125	9.4883	9.243		1125	10.5115	9.5524
1126	10.2495	10.1673		1126	9.5015	8.8561		1126	10.044	9.8352		1126	9.5	9.3341		1126	10.5398	9.2916
1127	10.3689	10.0714		1127	10.7017	9.5539		1127	9.6584	9.7973		1127	9.9045	9.532		1127	10.3226	9.9284
1128	10.8873	10.1178		1128	11.3528	10.1281		1128	9.8025	10.2139		1128	10.1429	10.0647		1128	11.0554	9.68
1129	10.0664	10.2232		1129	10.657	9.6683		1129	9.7355	9.6543		1129	10.0641	9.4974		1129	10.4694	9.9982
1130	10.3565	10.4182		1130	10.308	9.1933		1130	9.1664	9.6977		1130	10.2026	9.5741		1130	11.0734	9.6966
1131	10.7823	10.4388		1131	10.4799	9.6439		1131	8.8772	9.1248		1131	9.8264	10.041		1131	10.6031	10.0528
1132	10.1868	10.2408		1132	11.1403	9.9417		1132	9.449	9.3545		1132	9.9038	9.4798		1132	10.6596	10.0482
1133	9.7899	10.0894		1133	11.1411	9.7186		1133	9.3584	9.6577		1133	10.3492	10.0091		1133	10.335	9.8604
1134	10.1756	10.5151		1134	10.1832	9.4789		1134	9.5497	9.541		1134	9.5526	9.4467		1134	10.5399	9.9461
1135	10.0206	9.9602		1135	10.4559	9.2443		1135	9.916	9.8849		1135	9.8449	9.9776		1135	10.306	9.7585
1136	9.877	9.7839		1136	11.0638	9.8214		1136	9.8769	9.8489		1136	9.5554	9.8967		1136	10.5446	9.8269
1137	10.018	10.2124		1137	11.0548	10.1505		1137	9.843	9.7293		1137	10.0378	10.3714		1137	10.5789	9.5918
1138	9.8322	9.9436		1138	11.5333	9.8341		1138	9.3456	9.7353		1138	9.4541	9.301		1138	10.552	9.4868
1139	10.686	10.7008		1139	10.2581	9.3567		1139	9.4713	9.9579		1139	9.4361	10.0711		1139	10.4237	10.1013
1140	10.3212	9.943		1140	10.187	9.2621		1140	9.8144	9.717		1140	9.3952	9.6274		1140	10.7581	9.7394
1141	10.0144	9.8527		1141	10.156	9.2293		1141	9.382	9.8177		1141	9.7124	10.314		1141	10.1485	9.5954
1142	9.8203	9.4745		1142	10.3177	9.1594		1142	9.5807	9.6958		1142	9.8505	9.2279		1142	10.6402	9.5795
1143	10.0271	10.3914		1143	10.1797	9.5754		1143	9.4609	10.1119		1143	9.8131	9.5974		1143	10.062	9.6283
1144	10.0619	9.7944		1144	9.9112	9.1027		1144	10.0557	9.9684		1144	9.4613	9.6701		1144	10.5356	9.407
1145	10.5755	10.0056		1145	10.0762	9.2041		1145	9.882	10.2595		1145	9.3731	9.4116		1145	10.7625	9.8899
1146	10.4856	9.821		1146	10.5407	9.3025		1146	10.0572	10.5071		1146	9.9908	9.9546		1146	10.4275	9.3256
1147	10.7465	10.2518		1147	10.1793	9.4636		1147	9.7857	9.8739		1147	9.3575	9.2327		1147	10.5763	9.9466
1148	10.3159	10.1824		1148	10.0614	9.1595		1148	10.0896	10.1414		1148	9.7893	9.7161		1148	10.3096	10.0992
1149	9.7745	9.8611		1149	10.0884	9.3245		1149	9.7406	10.2085		1149	9.254	9.2749		1149	10.6623	9.9061
1150	10.147	9.3884		1150	10.6301	9.6621		1150	9.7325	9.5336		1150	9.6234	9.3486		1150	11.0661	9.9343
1151	10.2427	10.0947		1151	10.6603	9.7514		1151	9.1467	9.5098		1151	10.1561	9.9456		1151	10.5959	9.6789
1152	10.0286	9.8141		1152	9.7072	8.8267		1152	9.5127	9.517		1152	9.2716	9.5386		1152	10.53	9.755
1153	9.8209	9.6785		1153	10.3218	10.0946		1153	9.9809	9.5495		1153	9.5051	9.6438		1153	10.5476	9.3057
1154	10.3796	10.009		1154	10.1404	9.6957		1154	10.2002	9.7349		1154	9.428	9.7484		1154	10.3496	9.7661
1155	9.8299	9.5924		1155	10.2048	9.8662		1155	9.8187	9.8669		1155	10.2332	10.0952		1155	10.3341	10.1948
1156	10.1202	10.0241		1156	10.1042	9.3948		1156	9.5627	9.9117		1156	10.2459	10.4803		1156	10.7208	10.1709
1157	10.1105	9.5816		1157	9.7502	9.1285		1157	9.8796	9.9483		1157	9.5777	9.7315		1157	10.7545	9.6232
1158	10.0891	9.8995		1158	10.0281	9.9492		1158	9.7029	9.4161		1158	9.6416	9.6529		1158	10.7497	9.8221
1159	10.355	9.7256		1159	10.2748	9.7463		1159	10.1107	9.6672		1159	9.7219	9.6488		1159	10.7768	9.9888
1160	10.4377	10.5019		1160	10.3617	9.3751		1160	10.0057	9.8813		1160	10.0894	9.7052		1160	10.7481	9.893
1161	10.314	9.7729		1161	10.1715	9.5326		1161	9.8548	10.1007		1161	9.644	9.717		1161	10.2565	9.4035
1162	10.0481	10.0747		1162	10.1034	9.0053		1162	10.247	10.1664		1162	9.6779	9.6419		1162	10.4605	9.8268
1163	10.2316	9.7095		1163	10.2688	9.4656		1163	10.0959	10.0124		1163	9.632	9.5892		1163	10.4699	9.7334
1164	9.973	9.3484		1164	10.35	9.3381		1164	9.6581	9.9204		1164	10.0475	9.9588		1164	10.7602	9.9404
1165	9.8847	10.0864		1165	9.7979	9.0658		1165	9.8612	9.8187		1165	9.914	9.6254		1165	10.9796	10.3436
1166	10.0302	9.4921		1166	10.2221	9.4855		1166	10.0417	9.6294		1166	9.6371	9.7811		1166	10.6282	9.9477
1167	10.669	10.013		1167	9.9853	9.4981		1167	10.0295	10.2705		1167	10.0663	9.6517		1167	10.5027	9.8011
1168	10.645	9.8641		1168	10.0731	9.3059		1168	10.3478	10.0304		1168	9.7341	9.6063		1168	10.2156	9.8266
1169	10.6225	9.53		1169	9.8523	9.1002		1169	9.8833	9.8724		1169	9.7536	9.509		1169	10.8603	9.9383
1170	10.0305	9.5589		1170	9.4598	9.0848		1170	9.8112	10.1439		1170	10.7309	9.9945		1170	10.5301	9.8732
1171	9.5596	9.3724		1171	9.2893	8.7812		1171	9.9022	9.7846		1171	10.2104	9.7664		1171	10.574	9.8713
1172	10.1723	9.9596		1172	10.2378	9.3514		1172	10.2306	9.9067		1172	9.4021	9.4537		1172	10.3807	9.7349
1173	10.1571	9.9193		1173	10.5137	9.5309		1173	10.1272	9.7389		1173	9.4053	9.2747		1173	10.2592	9.6111
1174	10.3919	9.6279		1174	10.1076	9.0456		1174	9.636	10.0689		1174	9.7818	9.9154		1174	10.5966	9.6157
1175	10.5337	10.221		1175	10.4533	9.633		1175	10.08	9.624		1175	9.5949	9.9199		1175	10.5627	9.7805
1176	10.3275	10.3614		1176	9.7781	9.1477		1176	10.2021	10.0801		1176	10.0519	9.8064		1176	10.7526	10.1027
1177	10.1219	9.8118		1177	9.8771	9.2415		1177	10.3504	10.2457		1177	10.3105	9.996		1177	10.8436	9.8163
1178	10.3375	9.6272		1178	10.4941	9.7206		1178	10.052	10.1084		1178	10.1207	9.8582		1178	11.1598	10.2773
1179	10.2321	9.9693		1179	10.204	9.4011		1179	10.1531	9.9308		1179	9.8365	9.4778		1179	10.5257	9.6283
1180	9.9409	9.8203		1180	9.7637	9.1799		1180	9.7336	9.5546		1180	10.2177	9.8431		1180	10.7863	9.9162
1181	9.753	9.9481		1181	10.0975	9.3177		1181	10.0524	9.6263		1181	10.526	10.0833		1181	10.6916	9.4653
1182	9.6883	9.6421		1182	10.0741	9.2578		1182	10.2168	9.5424		1182	10.567	10.5272		1182	10.4415	9.5531
1183	9.9566	9.7297		1183	10.4656	9.5031		1183	9.9021	9.6131		1183	10.247	9.5803		1183	10.6246	9.8041
1184	10.2892	10.0415		1184	10.8116	9.9665		1184	10.0513	9.5955		1184	10.5621	9.512		1184	11.039	10.1629
1185	10.2837	9.9574		1185	10.8539	9.909		1185	9.8056	9.7968		1185	9.9	9.3494		1185	10.6428	9.7012
1186	10.3089	9.9037		1186	10.0002	9.1792		1186	9.8939	9.8072		1186	10.1147	9.8932		1186	10.3265	10.0638
1187	10.6484	9.757		1187	10.5052	9.4013		1187	10.0637	9.949		1187	10.2591	9.574		1187	10.949	9.7854
1188	10.3496	10.217		1188	10.5125	9.7532		1188	9.5004	9.7258		1188	9.9937	10.0588		1188	10.4959	9.6937
1189	10.2087	9.9977		1189	10.1344	9.5253		1189	9.9247	9.969		1189	9.6995	9.6019		1189	9.8661	9.4336
1190	10.7049	10.2147		1190	9.8683	9.1588		1190	10.24	10.3686		1190	10.0585	9.9114		1190	10.3879	9.6919
1191	10.6558	9.7761		1191	10.2225	9.3036		1191	10.1915	9.9786		1191	10.2272	9.9173		1191	10.4567	9.9857
1192	10.464	10.0146		1192	10.4643	9.4641		1192	10.3482	10.469		1192	9.9868	9.636		1192	10.5303	10.0331
1193	10.708	10.1669		1193	10.2025	9.6157		1193	9.9314	10.1823		1193	9.9058	9.6601		1193	10.3794	9.6758
1194	10.3575	10.2538		1194	10.0997	9.521		1194	9.4073	9.9398		1194	10.2375	9.809		1194	10.7219	10.0432
1195	10.2703	9.8239		1195	9.8127	8.8927		1195	9.8746	9.8862		1195	10.0938	10.0386		1195	10.5627	9.6373
1196	9.8928	9.6679		1196	9.7654	9.0962		1196	9.61	9.6367		1196	9.6319	9.4871		1196	10.2158	9.7018
1197	10.6358	10.2987		1197	10.2162	9.873		1197	10.2116	9.5884		1197	9.6566	9.513		1197	10.7524	9.4971
1198	10.6954	10.0579		1198	10.5397	9.9131		1198	9.9395	9.7225		1198	9.8646	9.9575		1198	10.6075	9.5255
1199	10.4486	9.9914		1199	10.1912	9.5852		1199	9.5831	9.9377		1199	9.3973	9.7706		1199	10.574	9.5792
1200	10.2866	9.8953		1200	9.8145	9.3033		1200	9.7387	10.0121		1200	9.7805	9.9088		1200	10.3208	9.6225
1201	10.1826	9.7489		1201	10.2377	9.6985		1201	9.9409	10.0913		1201	9.6222	10.1493		1201	10.6478	9.8518
1202	10.339	9.6932		1202	10.6311	9.1432		1202	10.0249	9.9793		1202	9.5432	10.2778		1202	10.0569	9.4736
1203	10.5776	9.9084		1203	10.5751	9.53		1203	9.6655	10.0713		1203	9.3334	9.2021		1203	10.3048	9.561
1204	10.6785	9.9694		1204	10.3697	9.7011		1204	10.3727	10.356		1204	8.9552	9.0858		1204	10.29	9.8787
1205	10.946	10.1637		1205	10.4697	9.4597		1205	9.9559	9.406		1205	9.4745	9.2525		1205	10.1023	9.5587
1206	10.2505	9.684		1206	10.3748	9.539		1206	9.8951	9.6827		1206	10.0175	9.6701		1206	10.5572	10.0917
1207	11.7604	10.4219		1207	9.9192	9.4974		1207	9.9252	9.7701		1207	9.632	9.5902		1207	10.2467	9.5213
1208	9.9798	9.7197		1208	10.3047	9.282		1208	9.8891	10.0846		1208	9.8465	9.8367		1208	10.0116	9.7184
1209	10.634	10.3679		1209	9.7619	9.1566		1209	10.2447	9.7165		1209	9.6045	9.6972		1209	10.0939	9.855
1210	10.3946	10.1051		1210	10.3405	9.2627		1210	10.1174	9.788		1210	9.4734	9.8637		1210	10.3672	10.0499
1211	10.2509	10.426		1211	9.9008	9.1573		1211	9.709	9.5915		1211	9.7136	9.7293		1211	10.625	9.9212
1212	9.9221	9.9244		1212	10.4007	9.4627		1212	10.0288	9.6574		1212	9.5665	9.7055		1212	10.1315	9.6759
1213	10.2221	10.0106		1213	9.7866	9.2098		1213	9.8604	9.8188		1213	10.0039	9.736		1213	10.4716	9.4773
1214	10.8041	9.9367		1214	9.9915	8.9153		1214	9.9373	10.1085		1214	9.9136	9.5262		1214	9.6427	9.4859
1215	10.7	10.0402		1215	10.4033	9.1971		1215	9.3169	9.8535		1215	9.5524	9.0926		1215	10.3503	9.908
1216	9.965	9.9886		1216	10.0201	8.893		1216	10.0128	10.1062		1216	10.3366	9.3205		1216	10.8547	9.524
1217	10.9536	9.7267		1217	9.9699	9.3138		1217	9.9666	9.8342		1217	10.1155	9.3981		1217	10.2601	9.7994
1218	10.9261	10.0641		1218	9.9904	9.2356		1218	10.2553	9.8818		1218	10.4458	9.2229		1218	10.6159	9.9987
1219	10.6365	9.6815		1219	10.8542	9.5427		1219	10.2571	10.6711		1219	9.7867	9.1844		1219	10.7913	9.8696
1220	10.3233	10.007		1220	9.6128	9.0214		1220	9.9658	9.9767		1220	9.973	9.7397		1220	10.2774	9.7536
1221	11.099	9.8206		1221	10.3159	9.4899		1221	9.9889	10.0246		1221	9.6204	9.4732		1221	10.0653	9.749
1222	10.541	10.1182		1222	10.5286	10.0283		1222	9.6871	9.8835		1222	9.9645	9.6524		1222	10.2878	9.7579
1223	11.2868	9.9929		1223	10.0021	9.3776		1223	10.0519	9.8357		1223	10.3547	9.3763		1223	10.4014	10.0064
1224	10.0201	9.5378		1224	9.7182	9.4535		1224	9.8304	10.1225		1224	9.8877	9.5981		1224	10.1121	9.7866
1225	9.9184	9.8775		1225	10.0071	9.8589		1225	9.5427	9.8357		1225	9.6388	9.4475		1225	10.3906	9.7984
1226	9.975	9.6168		1226	9.9379	9.2418		1226	9.659	9.7822		1226	9.7049	9.7236		1226	10.834	10.0582
1227	11.0286	9.9568		1227	10.038	9.744		1227	10.2104	10.1076		1227	9.4076	9.398		1227	10.1745	9.5126
1228	10.4454	9.7587		1228	10.6381	9.8535		1228	9.5762	9.9221		1228	9.7509	9.2977		1228	10.2193	9.5736
1229	10.8845	9.9008		1229	10.1974	9.4047		1229	10.0939	9.8938		1229	9.8537	9.387		1229	10.5221	10.003
1230	9.7905	9.9064		1230	10.157	9.6987		1230	9.7269	10.0963		1230	9.9566	9.5805		1230	10.6298	9.7356
1231	10.1105	9.4275		1231	9.5629	9.5847		1231	9.7525	9.9363		1231	9.9953	9.6937		1231	10.3294	9.5205
1232	10.0992	9.679		1232	9.5795	9.21		1232	10.2015	10.0281		1232	9.9749	9.3579		1232	10.7411	9.9714
1233	10.1455	9.3928		1233	10.327	9.3736		1233	10.1913	10.3942		1233	9.468	9.1428		1233	10.3909	9.8304
1234	9.994	9.408		1234	10.7483	9.5698		1234	10.0071	10.0645		1234	10.0669	9.4877		1234	10.746	10.2173
1235	10.3994	9.2214		1235	10.3802	9.5444		1235	10.1459	9.8036		1235	10.1656	9.797		1235	10.5858	9.7576
1236	10.0947	9.1637		1236	10.7893	9.4146		1236	9.6773	9.7813		1236	10.1085	9.5415		1236	10.3148	9.4049
1237	10.1666	9.348		1237	10.3881	10.1994		1237	10.3184	9.9165		1237	10.3002	9.7299		1237	10.351	9.6716
1238	10.1207	9.7527		1238	10.7707	10.4548		1238	9.8822	9.8292		1238	9.876	9.8184		1238	10.2091	9.5507
1239	10.164	9.1964		1239	10.1631	9.6156		1239	10.0054	9.7222		1239	9.7504	8.9385		1239	10.5764	9.6359
1240	10.4292	9.5413		1240	10.1098	9.3428		1240	10.2206	10.5431		1240	9.8705	9.6674		1240	10.4488	10.0721
1241	10.3118	9.4329		1241	10.6468	9.6351		1241	9.7421	10.0935		1241	9.8377	9.4846		1241	10.5118	9.8866
1242	9.5266	9.3325		1242	9.8959	9.3404		1242	10.2143	10.005		1242	9.3322	9.3484		1242	9.9219	9.7536
1243	10.0019	9.4173		1243	10.6608	9.62		1243	10.1444	10.0504		1243	9.8486	9.7477		1243	10.6236	9.6277
1244	9.7739	9.1102		1244	10.3203	9.3726		1244	10.3305	10.2378		1244	10.0048	9.8045		1244	10.1535	9.3753
1245	10.1855	9.879		1245	10.5745	9.39		1245	9.7242	9.6849		1245	10.0144	10.0111		1245	10.3392	9.8432
1246	10.5746	9.7736		1246	10.7875	9.9016		1246	10.1607	9.5119		1246	10.5206	9.9422		1246	10.387	9.7849
1247	10.4019	9.6031		1247	10.2102	9.3932		1247	10.1447	10.0169		1247	9.9078	10.0579		1247	10.5173	9.4247
1248	10.2044	9.4478		1248	9.9439	8.9633		1248	9.5824	9.3075		1248	9.5288	9.462		1248	9.938	9.4282
1249	10.2593	9.8262		1249	9.886	8.7819		1249	10.1282	9.9358		1249	9.775	9.3568		1249	10.2011	9.7135
1250	10.8319	9.8234		1250	9.7218	9.3209		1250	10.053	9.802		1250	9.4472	9.4534		1250	10.2322	9.7244
1251	10.1851	10.2491		1251	9.8119	8.7945		1251	10.2569	9.9559		1251	9.9765	9.9622		1251	10.8186	9.8394
1252	10.291	9.4508		1252	9.9204	9.1321		1252	9.8923	9.8361		1252	9.713	9.6363		1252	10.0217	9.451
1253	9.6433	9.2683		1253	9.9666	8.4684		1253	10.1698	9.8728		1253	9.9533	10.0128		1253	10.3087	10.1764
1254	9.7001	9.6948		1254	10.2157	9.4262		1254	9.8608	9.5072		1254	9.7727	9.6787		1254	10.7616	10.0363
1255	10.7835	9.7153		1255	10.1355	9.158		1255	9.7868	9.7717		1255	9.1365	9.0043		1255	9.9987	9.0984
1256	9.3272	8.8839		1256	10.1862	9.2989		1256	10.0859	9.9532		1256	9.266	9.0477		1256	10.5216	9.7831
1257	10.1078	9.8754		1257	9.4235	9.1448		1257	9.4957	9.615		1257	9.2344	9.6563		1257	10.1929	9.6287
1258	10.6631	10.233		1258	9.792	9.2		1258	9.763	9.6916		1258	9.2483	9.4921		1258	10.0714	9.4848
1259	10.0429	9.7615		1259	9.9343	8.9684		1259	10.0338	9.7206		1259	8.8809	9.0687		1259	10.502	10.0381
1260	10.1134	9.4841		1260	10.2768	9.2478		1260	10.1684	9.9984		1260	8.6095	9.192		1260	10.1601	9.5984
1261	10.6172	9.931		1261	9.8891	9.1617		1261	9.3343	9.6515		1261	8.3947	8.8485		1261	10.3751	9.5406
1262	10.5181	10.0725		1262	10.3676	9.171		1262	9.8813	9.6659		1262	9.2345	9.6511		1262	10.119	9.5595
1263	10.4126	10.4894		1263	9.7914	9.2142		1263	9.8244	9.6705		1263	9.0962	9.5803		1263	10.3947	9.9056
1264	10.9122	10.465		1264	9.6605	9.0305		1264	9.833	9.7816		1264	9	9.1221		1264	10.4965	9.5599
1265	10.2961	10.4182		1265	9.9511	9.7019		1265	10.1679	9.8267		1265	9.0688	8.8204		1265	10.3371	9.7289
1266	9.3123	9.6101		1266	10.2854	9.5314		1266	9.7071	9.6579		1266	9.4047	9.0945		1266	10.2328	9.2935
1267	10.0133	10.0668		1267	9.7261	9.4227		1267	9.686	9.8033		1267	9.3236	9.4991		1267	10.0822	9.2723
1268	10.4984	9.9652		1268	10.4456	9.5496		1268	9.781	10.0331		1268	8.8831	9.0598		1268	10.1511	9.7729
1269	10.0778	9.8973		1269	9.6673	8.8831		1269	10.0557	9.7754		1269	8.7688	8.3528		1269	10.2467	9.7638
1270	10.8019	9.7537		1270	10.3103	9.1483		1270	9.6043	9.5603		1270	9.126	8.8782		1270	10.3682	10.0626
1271	10.505	9.7278		1271	10.1779	9.1808		1271	9.5741	9.8296		1271	9.2399	9.2681		1271	9.9783	9.6317
1272	10.8383	9.9577		1272	9.7884	9.3204		1272	10.1017	10.3645		1272	8.5694	8.7209		1272	10.5006	9.8459
1273	10.8388	10.145		1273	10.1826	9.575		1273	9.3743	9.3242		1273	9.0146	8.8267		1273	10.2222	9.8684
1274	10.2949	10.089		1274	10.1726	9.3867		1274	9.8944	9.7838		1274	9.1315	8.8463		1274	9.9774	9.7785
1275	10.6285	9.9923		1275	9.5094	9.0681		1275	9.8123	9.8557		1275	9.4136	9.024		1275	10.3325	9.9196
1276	10.3158	9.9343		1276	9.6602	9.5407		1276	10.0531	9.8916		1276	9.412	9.4172		1276	10.3636	9.8825
1277	10.62	9.9167		1277	9.7367	9.3564		1277	10.0412	9.6132		1277	9.2479	9.2639		1277	10.175	9.765
1278	10.9487	10.0981		1278	9.8145	9.1204		1278	9.9487	9.8231		1278	9.1127	9.1317		1278	10.2484	10.0967
1279	10.4664	10.3197		1279	9.7561	9.5746		1279	10.1454	10.2242		1279	9.1388	8.799		1279	10.4115	9.9344
1280	10.3818	9.7817		1280	9.5604	9.0756		1280	9.5006	9.5484		1280	8.7436	8.786		1280	10.2423	9.6708
1281	10.4945	10.1528		1281	9.9467	9.3177		1281	9.9572	10.0465		1281	9.3058	9.4716		1281	10.2919	9.7228
1282	10.1797	10.1966		1282	9.9603	9.0605		1282	10.4937	10.1853		1282	9.5061	9.6765		1282	10.3425	9.8237
1283	10.1391	10.4427		1283	10.4586	9.5108		1283	9.7154	9.9018		1283	9.4779	9.5052		1283	10.3538	9.9316
1284	10.3837	10.0448		1284	10.3008	9.1962		1284	9.6307	9.6702		1284	9.2222	9.2574		1284	10.1106	9.6448
1285	10.1832	9.7967		1285	10.0018	9.8873		1285	9.9678	10.1675		1285	9.6526	9.6989		1285	10.2628	9.3858
1286	9.9209	9.9033		1286	9.8255	9.3775		1286	9.894	9.7056		1286	10.0553	9.8794		1286	10.2266	9.5734
1287	10.6726	9.7855		1287	10.057	9.4041		1287	10.24	9.9444		1287	9.6735	9.7782		1287	9.7439	9.714
1288	10.217	9.2902		1288	9.4782	9.2014		1288	9.9213	9.4497		1288	9.6958	9.657		1288	10.4767	9.7601
1289	10.5172	9.7557		1289	10.3257	9.33		1289	9.3734	9.4727		1289	10.1376	9.441		1289	10.2672	9.5911
1290	9.9819	9.5892		1290	10.0892	9.6264		1290	9.7475	9.5508		1290	9.9379	9.6119		1290	10.2667	9.6052
1291	10.0384	9.8186		1291	10.3161	9.7632		1291	9.5597	9.4473		1291	10.2598	9.8512		1291	10.6875	9.9009
1292	10.5629	9.8901		1292	10.4303	9.5721		1292	9.9074	9.4561		1292	9.64	9.209		1292	10.4111	9.6454
1293	10.3274	10.1165		1293	10.5378	10.0055		1293	9.5753	9.5994		1293	10.2049	9.7166		1293	10.4486	9.4992
1294	10.9746	10.7186		1294	10.4342	9.5482		1294	9.4163	9.7809		1294	9.859	9.4577		1294	10.0434	9.9387
1295	10.6705	10.3114		1295	10.0494	9.3789		1295	9.945	9.9037		1295	9.5145	9.2665		1295	10.6371	9.5708
1296	10.9464	9.6748		1296	10.0138	9.3997		1296	9.7393	9.6373		1296	9.337	9.3702		1296	10.4801	9.8897
1297	9.9592	9.6463		1297	10.2176	9.541		1297	9.4313	9.8757		1297	8.9769	9.1655		1297	10.0943	9.3889
1298	9.8291	9.5192		1298	10.1198	9.0586		1298	9.6244	9.6066		1298	9.1724	9.0995		1298	10.524	9.8235
1299	10.7815	9.9613		1299	10.1611	8.9683		1299	9.9218	9.9848		1299	9.967	9.7485		1299	10.2056	9.6222
1300	10.7816	9.5941		1300	10.0939	9.2396		1300	10.0321	9.7806		1300	9.6575	9.4331		1300	10.384	9.4617
1301	9.999	9.9666		1301	9.9184	9.6975		1301	9.86	9.6157		1301	9.6524	9.753		1301	10.7275	10.0229
1302	10.4415	9.7828		1302	10.4873	9.6232		1302	9.6358	10.0484		1302	9.9238	9.677		1302	10.2319	9.6781
1303	10.7683	9.8898		1303	10.5528	9.5837		1303	10.158	10.1546		1303	9.7806	9.4268		1303	10.416	9.6368
1304	11.4205	10.3036		1304	10.8478	9.3461		1304	9.7978	9.9708		1304	9.2724	9.2996		1304	10.1193	9.6442
1305	9.6734	9.3221		1305	9.5238	9.2368		1305	9.8835	10.0988		1305	9.7613	9.7191		1305	10.1409	9.5211
1306	10.2703	10.1749		1306	10.3085	9.0201		1306	9.639	9.9446		1306	9.6646	9.272		1306	10.4376	9.8172
1307	10.4861	10.0709		1307	10.2804	9.5092		1307	10.0601	9.7061		1307	9.7131	9.0935		1307	9.7044	9.6283
1308	10.4023	9.8454		1308	10.1889	9.0665		1308	10.2849	9.9847		1308	9.723	10.0209		1308	10.3815	9.7344
1309	10.4308	10.2252		1309	10.312	9.52		1309	10.4181	10.2356		1309	9.6004	9.7489		1309	10.1458	9.528
1310	10.3511	10.2992		1310	10.5703	9.4917		1310	9.7942	9.9582		1310	9.5256	9.4353		1310	10.5447	10.001
1311	10.6756	9.9756		1311	10.0472	9.1976		1311	9.6182	9.2946		1311	9.4712	9.1124		1311	10.335	9.8447
1312	10.1529	9.7775		1312	9.9621	9.3681		1312	10.0672	10.1534		1312	10.0634	9.4695		1312	9.6007	9.5215
1313	10.5587	9.9882		1313	10.017	9.7115		1313	9.483	9.5255		1313	9.4174	9.5985		1313	10.9958	9.9511
1314	10.2438	10.15		1314	10.2362	9.4432		1314	10.5634	9.8652		1314	10.1734	10.2486		1314	10.1777	9.6646
1315	9.9944	9.4896		1315	10.3125	9.6361		1315	10.1778	10.3417		1315	9.7053	9.5091		1315	10.5749	10.0322
1316	10.041	9.9552		1316	10.001	9.6691		1316	9.9804	10.3758		1316	9.9072	9.4208		1316	10.6131	9.4931
1317	10.8998	9.9415		1317	10.1414	9.6124		1317	9.9736	10.1936		1317	9.8763	9.6336		1317	10.4152	9.501
1318	10.0538	10.2458		1318	9.906	8.8619		1318	9.485	9.5581		1318	9.6816	9.7387		1318	10.2545	9.7749
1319	10.6372	10.1703		1319	10.2062	9.4895		1319	9.5917	9.4806		1319	9.9177	9.7245		1319	10.3356	10.0009
1320	10.4147	9.8872		1320	9.8293	9.386		1320	9.5226	9.5704		1320	10.3952	9.4818		1320	10.5331	10.0092
1321	9.8079	9.461		1321	10.1549	9.1848		1321	9.8938	10.0398		1321	9.6999	9.0889		1321	10.3728	9.4988
1322	10.1919	9.6134		1322	10.0006	9.5023		1322	9.5374	9.8164		1322	10.3063	9.326		1322	10.525	9.7679
1323	10.1668	9.5703		1323	9.9013	9.2288		1323	10.2255	9.7097		1323	9.7288	9.5823		1323	10.4153	9.9274
1324	10.4908	9.4223		1324	9.9825	9.4629		1324	9.8478	9.7848		1324	9.866	9.359		1324	10.6	9.8158
1325	10.0163	9.6089		1325	10.1072	9.4475		1325	9.5842	9.473		1325	10.0196	9.6823		1325	10.3477	9.6031
1326	10.198	9.7756		1326	9.1266	8.991		1326	10.1894	9.6735		1326	9.7285	9.6342		1326	10.1802	9.4351
1327	10.7183	9.7071		1327	9.9023	9.5419		1327	9.6995	9.6527		1327	9.5201	9.6378		1327	10.1696	9.6127
1328	10.2961	10.0841		1328	10.1911	9.7419		1328	10.0585	9.5893		1328	9.7065	9.3791		1328	10.3899	9.9882
1329	10.3612	9.65		1329	9.8254	9.5565		1329	10.1181	9.4369		1329	9.9617	9.2848		1329	10.5918	10.0835
1330	10.1555	9.5852		1330	9.7349	8.9304		1330	9.6733	9.5934		1330	9.7273	9.5389		1330	10.7319	9.958
1331	10.5148	9.9913		1331	10.0502	9.1055		1331	9.3827	9.2051		1331	10.022	10.3059		1331	10.032	9.3412
1332	10.0593	9.8055		1332	10.3331	9.0907		1332	9.4416	8.8864		1332	9.7207	9.697		1332	10.342	10.082
1333	9.9509	9.6984		1333	9.951	8.8913		1333	10.4949	10.4642		1333	9.8376	9.7998		1333	9.9978	10.1881
1334	10.3597	9.7391		1334	10.3844	9.2107		1334	9.8631	9.733		1334	9.7817	9.5129		1334	10.5023	9.8781
1335	10.0443	9.1909		1335	9.9078	9.4175		1335	9.9501	9.9326		1335	9.7113	9.5899		1335	10.5268	9.5016
1336	9.7234	9.3678		1336	10.5749	9.3146		1336	9.1789	9.4812		1336	10.3069	9.9205		1336	10.7028	9.816
1337	9.5776	8.8143		1337	10.3296	9.2092		1337	10.0796	9.5906		1337	10.0608	10.0724		1337	10.814	10.2307
1338	10.8544	9.9622		1338	9.9537	9.4126		1338	9.4968	9.7223		1338	10.1271	9.8319		1338	10.1061	9.2529
1339	10.4353	9.6998		1339	10.0987	9.3916		1339	9.9128	9.7415		1339	9.6593	9.534		1339	9.7025	9.5407
1340	10.6484	10.0182		1340	10.1771	9.9045		1340	10.144	10.0681		1340	10.5009	9.5679		1340	10.2831	9.5732
1341	10.8385	10.1159		1341	10.0305	9.2364		1341	10.1539	9.8869		1341	10.047	9.1581		1341	10.3178	9.5122
1342	10.8854	9.8368		1342	9.5495	9.5972		1342	9.7121	9.7337		1342	9.3538	9.2173		1342	11.1179	10.5145
1343	10.3627	9.6396		1343	9.8784	9.0404		1343	9.1784	9.5905		1343	9.8718	9.5253		1343	10.6239	10.1965
1344	9.6687	9.0373		1344	9.7712	9.1425		1344	9.7225	9.7166		1344	10.2917	9.7101		1344	11.0385	10.0799
1345	10.2718	9.1846		1345	9.9587	9.7804		1345	9.5404	9.3913		1345	9.7224	9.2366		1345	10.3262	9.0694
1346	9.4778	9.0276		1346	9.8447	9.2583		1346	9.9594	9.7668		1346	9.5483	9.2289		1346	10.4396	9.8089
1347	9.9163	9.8253		1347	10.3174	9.421		1347	9.9392	10.0426		1347	9.9757	9.6785		1347	10.2142	9.6303
1348	9.785	9.1214		1348	10.6677	9.0202		1348	10.5341	10.0127		1348	9.9927	9.6121		1348	10.7885	9.92
1349	10.0844	9.9563		1349	10.4363	9.34		1349	10.1886	10.2314		1349	9.6673	8.9951		1349	10.4665	9.4538
1350	9.7812	8.981		1350	10.7231	8.9778		1350	10.1323	10.4234		1350	9.9998	9.8284		1350	10.7202	9.7752
1351	10.0814	9.3743		1351	10.8871	9.1278		1351	9.9403	10.0033		1351	9.7131	9.2967		1351	10.6157	9.7127
1352	9.8526	9.2976		1352	10.8778	9.2107		1352	10.1374	10.5694		1352	10.1667	9.6871		1352	10.0334	9.3621
1353	9.9558	9.461		1353	10.1251	9.2832		1353	10.0403	9.6511		1353	10.0321	9.4184		1353	10.4871	9.5828
1354	10.6897	9.5081		1354	10.0269	9.1704		1354	9.8984	9.8661		1354	9.4569	9.1828		1354	10.5637	9.5568
1355	10.4713	9.7294		1355	10.3246	9.3028		1355	9.8823	9.8139		1355	9.8063	9.6662		1355	10.0352	9.7879
1356	10.6481	9.9877		1356	10.4669	9.0571		1356	10.1627	9.7938		1356	10.0797	9.5746		1356	10.1452	9.783
1357	9.9299	9.8507		1357	9.9757	8.9061		1357	9.7692	9.6586		1357	9.4796	9.0632		1357	10.7779	10.0629
1358	10.1124	9.8836		1358	10.2452	9.2891		1358	10.1547	10.4196		1358	9.8008	9.9687		1358	10.2767	9.514
1359	10.4169	9.8475		1359	11.0141	9.7681		1359	9.6677	9.8986		1359	9.6484	9.8466		1359	10.2073	9.5387
1360	10.8928	9.559		1360	10.3054	9.1847		1360	10.1772	10.009		1360	9.9005	9.5814		1360	9.9973	9.6373
1361	10.0114	9.4025		1361	10.4864	9.2288		1361	9.5578	9.5836		1361	10.1236	9.9589		1361	10.2625	9.6413
1362	10.1537	9.5386		1362	9.853	8.9405		1362	10.6099	10.1137		1362	10.2195	9.4768		1362	10.4049	9.7102
1363	10.0477	9.559		1363	10.1839	9.0151		1363	9.8473	9.9744		1363	9.8648	9.6611		1363	10.4664	9.8355
1364	9.4832	9.3722		1364	10.7762	9.0837		1364	10.0727	10.0609		1364	9.7463	9.153		1364	10.3081	9.6563
1365	10.0442	9.7616		1365	10.8727	9.4507		1365	10.4809	9.9806		1365	9.9019	9.3488		1365	10.478	9.4565
1366	10.3509	9.7431		1366	10.4453	9.1521		1366	9.7395	9.8688		1366	10.1317	9.7765		1366	10.672	9.4783
1367	10.0415	9.5138		1367	10.4167	9.6496		1367	10.3232	10.309		1367	9.9419	9.5089		1367	10.4878	9.4093
1368	9.7773	9.3426		1368	10.1274	9.2417		1368	10.4265	9.7121		1368	9.842	9.5442		1368	10.2898	9.5469
1369	10.1139	9.4047		1369	10.3022	9.5927		1369	10.317	10.2391		1369	10.0596	9.5713		1369	10.6925	9.7866
1370	10.1311	8.9916		1370	10.0238	9.3083		1370	9.9104	9.1439		1370	9.3706	9.3804		1370	10.5461	9.8778
1371	10.3686	10.0017		1371	9.9369	9.3762		1371	10.6401	9.0526		1371	10.0367	9.7285		1371	10.3904	9.4396
1372	11.1719	9.978		1372	9.7657	9.3827		1372	9.4947	9.2879		1372	10.0467	9.5471		1372	10.2109	9.49
1373	10.4411	9.3334		1373	9.9414	9.6947		1373	9.8728	9.4566		1373	9.8151	9.4225		1373	10.6199	9.4476
1374	10.6146	9.4359		1374	10.3232	9.8333		1374	9.6988	8.9945		1374	10.0871	9.6355		1374	10.6226	9.9041
1375	9.682	9.3986		1375	10.0875	9.3659		1375	10.0012	10.3451		1375	10.1164	9.6813		1375	11.0313	10.2046
1376	9.6954	8.9868		1376	10.3726	9.3984		1376	9.728	9.6024		1376	10.0856	10.1744		1376	10.4257	9.5309
1377	10.394	10.0198		1377	10.1237	9.6042		1377	9.6935	9.4088		1377	9.9058	9.6923		1377	10.8457	9.594
1378	10.5364	9.4301		1378	10.6079	9.7019		1378	9.4698	9.5708		1378	9.9853	9.5378		1378	10.0591	9.8096
1379	10.9842	9.5861		1379	10.4585	9.7318		1379	9.6896	9.2527		1379	10.2819	9.2418		1379	10.7889	10.1065
1380	10.4492	8.9948		1380	10.1001	9.4694		1380	10.0822	10.0185		1380	10.3183	9.8783		1380	10.1149	9.9704
1381	10.2542	9.1566		1381	9.3352	9.1407		1381	9.8272	9.4882		1381	10.0813	9.8001		1381	10.4993	10.2545
1382	10.9467	9.2521		1382	10.0648	9.3148		1382	9.6787	9.5157		1382	9.861	9.4131		1382	10.5538	10.2432
1383	10.8501	9.4609		1383	9.8106	8.9496		1383	10.0145	9.8389		1383	9.7291	9.9224		1383	10.5251	9.9711
1384	10.608	9.4443		1384	10.0453	9.0746		1384	9.9	9.6263		1384	9.8535	9.654		1384	10.088	9.3481
1385	10.9696	9.7553		1385	9.9534	8.9281		1385	9.6302	9.5694		1385	9.9608	9.6885		1385	10.728	9.6001
1386	10.9142	9.1443		1386	10.2246	9.4036		1386	9.8531	9.5583		1386	10.0903	9.9949		1386	10.2883	9.8724
1387	10.4504	9.2534		1387	9.9214	9.5694		1387	9.6803	9.584		1387	9.6989	9.4718		1387	10.3481	9.6661
1388	10.5332	9.8847		1388	10.5308	9.2953		1388	10.078	10.0027		1388	9.7206	9.716		1388	10.8349	10.1827
1389	10.4895	9.524		1389	10.6307	9.3679		1389	9.6141	9.5724		1389	10.0011	9.4669		1389	10.3176	9.9948
1390	10.2271	9.6542		1390	10.845	9.1117		1390	9.0371	9.5584		1390	10.0551	9.1816		1390	10.4539	10.3795
1391	10.2278	9.1206		1391	11.0983	9.7047		1391	9.8912	9.6662		1391	9.7599	9.333		1391	10.442	9.9481
1392	10.2065	9.6978		1392	10.7312	9.5007		1392	9.6854	9.4755		1392	10.0367	9.378		1392	10.7726	10.1783
1393	10.1566	9.5331		1393	10.835	9.2034		1393	10.1173	10.0421		1393	9.8521	9.5144		1393	10.6242	9.7421
1394	10.6887	9.5469		1394	10.9581	9.3268		1394	9.6009	9.3988		1394	10.186	9.6822		1394	10.9204	9.9891
1395	10.2169	9.4243		1395	10.6522	9.1473		1395	9.3354	9.4106		1395	10.1169	9.9764		1395	10.0732	9.4659
1396	10.9501	9.9126		1396	10.4408	9.2738		1396	9.768	9.2029		1396	10.096	9.9637		1396	10.0873	9.5246
1397	10.3777	9.369		1397	10.9951	9.3417		1397	9.8322	9.3413		1397	10.9375	10.141		1397	10.0884	10.1232
1398	10.0646	9.7999		1398	10.5368	8.7863		1398	9.2565	9.2592		1398	9.9455	9.8095		1398	10.6646	10.1226
1399	11.3915	9.4752		1399	10.5478	9.2577		1399	9.5225	9.152		1399	10.5952	10.5095		1399	10.7127	10.0701
1400	10.82	9.5991		1400	10.6974	9.5725		1400	9.2554	9.464		1400	10.49	10.0308		1400	10.4311	9.7187
1401	10.1498	9.6715		1401	10.5037	9.384		1401	9.612	10.0978		1401	10.0088	9.9024		1401	10.2484	9.89
1402	10.6994	9.5286		1402	10.5273	9.225		1402	9.543	9.1452		1402	9.8678	9.9123		1402	10.679	10.25
1403	10.7719	9.6047		1403	10.787	9.3346		1403	9.3556	9.1972		1403	9.9674	9.6899		1403	10.4439	10.0268
1404	10.8361	9.3329		1404	9.6461	8.9022		1404	9.5328	8.9891		1404	9.8301	10.016		1404	10.2998	9.9353
1405	10.4102	9.5571		1405	9.8336	9.5341		1405	9.9738	10.072		1405	9.8842	10.0685		1405	10.1228	9.674
1406	10.5871	9.9099		1406	10.4858	9.208		1406	9.3439	9.493		1406	9.7198	10.0545		1406	10.3409	9.9658
1407	9.859	9.3966		1407	10.0599	9.3822		1407	9.639	9.6469		1407	9.9735	9.8862		1407	10.3147	9.6376
1408	9.6708	9.3278		1408	10.2897	9.412		1408	9.5564	9.6628		1408	10.1553	10.0203		1408	10.3107	9.7655
1409	9.9898	9.2846		1409	10.2393	9.5472		1409	10.1798	9.8606		1409	10.6371	10.5521		1409	10.2118	9.4256
1410	11.1448	9.582		1410	9.8838	8.8347		1410	9.9119	9.74		1410	10.1268	9.9579		1410	10.269	10.1864
1411	10.804	9.4938		1411	9.9852	8.7975		1411	9.4707	9.7153		1411	9.7956	9.919		1411	10.072	9.6582
1412	10.8169	9.8381		1412	9.4795	8.4963		1412	9.96	9.7884		1412	9.629	9.7744		1412	9.7586	9.8368
1413	10.6012	10.3503		1413	9.8782	8.7304		1413	10.0404	9.8367		1413	9.9014	9.7143		1413	10.7542	10.2936
1414	9.9547	9.019		1414	9.7353	8.9073		1414	9.743	9.5307		1414	8.9032	9.0031		1414	10.2953	9.6708
1415	9.8553	9.2892		1415	10.1612	8.7161		1415	9.9109	9.6599		1415	10.3051	9.8729		1415	10.4539	10.1822
1416	11.0184	9.6223		1416	9.7939	9.2661		1416	9.7735	9.9723		1416	9.9382	9.4595		1416	10.1452	9.9323
1417	10.4539	9.2561		1417	9.8868	9.4822		1417	10.6108	10.2026		1417	10.5601	10.4174		1417	10.5376	10.0217
1418	9.9218	9.4546		1418	9.8836	9.2856		1418	10.0346	10.0679		1418	10.1254	10.4912		1418	10.6877	9.6738
1419	9.5382	9.4175		1419	10.5195	9.7908		1419	9.9286	9.993		1419	9.8769	10.1131		1419	10.6985	9.666
1420	9.89	9.4291		1420	10.4957	9.5355		1420	9.9633	9.9297		1420	9.7775	9.9157		1420	10.2684	9.6192
1421	9.8688	8.7153		1421	10.2685	9.4826		1421	9.686	9.8954		1421	9.8053	9.7377		1421	10.4291	9.983
1422	9.7864	9.3577		1422	10.3383	9.667		1422	10.3552	9.9023		1422	9.8262	9.8127		1422	10.1795	10.241
1423	10.3245	9.7964		1423	10.019	9.5329		1423	9.4951	9.2548		1423	9.9018	9.6529		1423	10.2944	9.5514
1424	9.8912	9.1445		1424	10.2533	9.4836		1424	9.6835	9.3323		1424	9.865	9.879		1424	10.3248	9.7074
1425	9.9385	9.4894		1425	10.2015	9.3011		1425	9.6498	9.5307		1425	9.6529	9.5277		1425	10.1448	9.8221
1426	9.5589	9.8696		1426	10.1824	9.55		1426	9.466	9.5148		1426	9.6389	9.6764		1426	10.2438	9.4493
1427	9.8592	9.4709		1427	10.6206	9.7021		1427	9.8948	9.6008		1427	10.3434	10.4737		1427	9.691	9.7601
1428	9.828	9.1081		1428	9.738	9.1688		1428	9.7932	9.5484		1428	9.9118	9.9989		1428	9.6712	9.1396
1429	10.3153	9.7441		1429	9.9336	9.5135		1429	10.1752	9.9712		1429	8.9915	8.9627		1429	9.8441	9.2837
1430	9.7933	9.9777		1430	10.2229	9.6093		1430	9.8752	9.5739		1430	9.139	9.3941		1430	9.4727	9.2181
1431	9.9288	9.5791		1431	9.7928	9.5928		1431	10.2896	9.4813		1431	9.0212	9.2291		1431	9.8443	9.7629
1432	9.9083	9.6532		1432	10.4451	9.6925		1432	9.9116	9.1311		1432	9.7173	9.8184		1432	10.0438	9.5392
1433	10.2296	9.9646		1433	9.3666	9.2178		1433	9.9349	9.4872		1433	9.3311	9.9295		1433	10.3271	9.7958
1434	9.7761	9.7006		1434	10.0965	9.3884		1434	9.8643	9.7164		1434	9.0225	9.9544		1434	10.1132	9.8587
1435	10.0176	9.8667		1435	10.1664	9.2889		1435	10.1575	9.5956		1435	8.6899	9.1826		1435	9.9593	9.7806
1436	9.881	9.8649		1436	10.6413	9.6309		1436	10.4043	9.8307		1436	8.7326	8.8844		1436	9.9953	9.8864
1437	10.1701	10.0908		1437	10.0351	9.943		1437	9.854	9.2892		1437	9.0959	8.4546		1437	9.5431	9.0232
1438	9.8086	9.7789		1438	9.9689	9.0576		1438	9.514	9.5372		1438	10.6312	11.323		1438	9.5914	9.4229
1439	9.7019	9.8673		1439	10.2922	9.6193		1439	9.7518	9.4707		1439	9.7615	9.9856		1439	10.4616	9.8923
1440	9.8733	9.854		1440	10.2726	9.5417		1440	9.6561	9.3671		1440	9.422	9.5139		1440	9.8695	9.7375
1441	10.3561	9.4802		1441	10.2143	9.5164		1441	10.0895	9.6339		1441	10.4456	10.3052		1441	9.6521	9.4737
1442	9.5586	9.5327		1442	10.2763	9.2853		1442	9.5731	9.3004		1442	9.5208	9.5449		1442	10.2333	9.7956
1443	9.8713	9.5851		1443	9.9924	9.2152		1443	9.7323	9.6255		1443	8.8866	9.2122		1443	10.8311	10.4045
1444	9.6202	9.4543		1444	10.2638	9.8052		1444	9.3515	9.4951		1444	9.6871	9.4849		1444	10.9459	10.2368
1445	10.3406	10.067		1445	9.9877	9.5129		1445	10.065	9.5964		1445	9.2068	9.6269		1445	11.3051	10.5321
1446	10.0405	10.1011		1446	10.0095	9.1732		1446	9.305	9.6901		1446	9.3201	9.2657		1446	10.4854	10.6935
1447	10.3212	9.823		1447	9.9829	9.5302		1447	10.3633	9.6317		1447	9.3684	9.2498		1447	10.2864	10.568
1448	10.2043	9.9712		1448	10.0418	9.0113		1448	9.7544	9.4155		1448	9.0655	9.6495		1448	10.9448	10.2149
1449	9.7634	10.0171		1449	9.8571	9.2702		1449	9.6637	9.5191		1449	9.1363	9.2698		1449	11.0247	10.3794
1450	10.3228	10.2213		1450	10.3535	9.4146		1450	9.8201	9.5254		1450	9.3697	9.4595		1450	11.349	10.3383
1451	10.1678	9.8617		1451	9.6032	9.132		1451	10.1078	9.9354		1451	9.5419	9.4157		1451	10.4501	10.3156
1452	9.6554	9.6894		1452	9.9293	8.9276		1452	9.8518	9.5293		1452	9.5733	9.5363		1452	10.4134	10.0139
1453	10.0501	9.7767		1453	9.8936	9.4554		1453	9.7306	9.0918		1453	9.8968	9.526		1453	11.1837	10.4023
1454	9.4813	9.3675		1454	9.6912	8.9223		1454	9.96	9.563		1454	9.6863	9.3384		1454	10.6605	10.0076
1455	9.6984	9.6523		1455	10.0715	9.3452		1455	9.3848	9.36		1455	9.2694	9.6942		1455	11.5149	10.9879
1456	9.6354	9.6757		1456	10.4239	9.2726		1456	9.7882	9.2872		1456	9.5103	9.5323		1456	11.5496	10.307
1457	9.7926	9.9284		1457	10.0253	9.6212		1457	9.3912	9.1762		1457	8.9948	9.0435		1457	11.407	10.1965
1458	9.6554	9.7182		1458	10.2883	9.2601		1458	10.276	9.7455		1458	9.0222	9.329		1458	11.2444	10.0867
1459	9.4513	9.284		1459	10.1014	9.2832		1459	9.7469	9.551		1459	9.2984	9.1142		1459	11.1566	10.4552
1460	10.5488	9.6652		1460	10.0305	9.6535		1460	9.7045	9.2786		1460	9.9398	9.2744		1460	11.7697	10.2144
1461	10.0949	9.7955		1461	10.7168	9.6268		1461	9.6859	9.8272		1461	9.8708	9.6712		1461	11.83	10.3287
1462	10.438	10.1311		1462	9.9878	9.3261		1462	9.2793	9.483		1462	9.1229	9.1154		1462	11.7962	10.6913
1463	9.7213	9.5302		1463	10.0921	9.5086		1463	9.8656	9.539		1463	8.7185	8.8627		1463	11.312	10.7606
1464	9.8426	9.7677		1464	9.8267	8.9673		1464	9.8329	9.7013		1464	9.4074	9.5117		1464	11.4144	10.416
1465	10.2537	10.3515		1465	10.0131	9.2027		1465	9.2064	9.3186		1465	9.0015	8.9752		1465	11.3466	10.4924
1466	9.6237	9.521		1466	9.1962	9.0522		1466	9.3929	9.2159		1466	9.4632	8.9814		1466	11.3767	10.1982
1467	9.8171	9.7904		1467	10.084	9.0001		1467	9.4492	9.1123		1467	9.6783	9.0154		1467	11.3552	10.5811
1468	10.2895	10.0234		1468	10.9046	9.1968		1468	9.9957	9.6583		1468	9.4821	9.0065		1468	11.743	11.0874
1469	9.9065	9.8236		1469	10.3951	9.0789		1469	9.7365	9.6076		1469	9.2124	9.0374		1469	10.9577	9.936
1470	9.9934	10.3577		1470	10.1682	9.1626		1470	9.6962	9.3957		1470	9.2366	9.1762		1470	11.894	10.9081
1471	9.6935	9.9469		1471	9.9782	9.0066		1471	9.4427	9.4077		1471	9.2154	8.6953		1471	11.3825	10.3906
1472	9.8748	9.8684		1472	9.7887	8.8508		1472	10.1694	9.3579		1472	8.9462	8.9542		1472	11.006	9.8598
1473	9.797	9.8476		1473	10.119	9.1547		1473	9.9849	9.5415		1473	9.7925	9.1013		1473	11.5595	10.3083
1474	10.4802	10.5706		1474	9.7628	8.8872		1474	9.9469	9.5566		1474	9.4464	9.2964		1474	11.2826	10.4737
1475	10.0214	9.7097		1475	9.7183	9.1188		1475	9.5718	9.2617		1475	8.9993	9.4026		1475	10.8688	10.2182
1476	9.9937	9.6701		1476	10.0312	9.0124		1476	9.799	9.1939		1476	9.225	9.5813		1476	11.1799	10.4373
1477	9.7799	9.7923		1477	9.7499	9.406		1477	10.402	10.1506		1477	9.4534	9.299		1477	10.8763	10.1649
1478	10.0092	9.9391		1478	10.0427	9.2988		1478	10.066	9.6115		1478	9.5315	9.2586		1478	11.2524	10.585
1479	9.8706	9.7516		1479	10.5945	9.5872		1479	10.1455	9.7259		1479	9.1619	8.5923		1479	10.693	10.2508
1480	9.7172	10.1568		1480	9.4201	8.9097		1480	9.96	9.1495		1480	9.8049	9.2041		1480	10.6509	10.4667
1481	10.2219	9.9556		1481	9.7614	9.1289		1481	9.8777	9.5997		1481	9.0346	8.8034		1481	10.7145	10.2888
1482	10.0676	9.5015		1482	9.8715	9.0491		1482	9.793	9.5662		1482	9.7062	9.5964		1482	10.352	10.3758
1483	9.6863	9.9536		1483	10.1433	9.3985		1483	9.2856	9.3689		1483	9.2584	9.1217		1483	10.8637	10.6745
1484	9.5765	9.8748		1484	9.7685	9.5381		1484	9.5073	10.0078		1484	9.3743	9.3368		1484	10.2135	10.3217
1485	9.6868	9.4323		1485	9.7032	9.0046		1485	9.9058	9.6113		1485	9.274	9.6125		1485	10.7092	10.539
1486	9.7545	10.2255		1486	9.6317	9.1632		1486	9.4835	9.4945		1486	9.6659	9.3214		1486	10.7827	10.5391
1487	8.9666	9.3752		1487	9.7194	9.2163		1487	9.5485	9.5838		1487	10.1034	9.7945		1487	10.5064	10.1198
1488	10.0498	10.2281		1488	9.7383	9.125		1488	10.0695	9.583		1488	9.3452	9.0591		1488	10.9328	10.296
1489	9.7956	9.5707		1489	9.3157	8.6542		1489	9.4552	9.2559		1489	9.1556	9.3887		1489	10.3838	10.094
1490	10.3198	10.0081		1490	10.4988	9.5249		1490	10.5293	10.0221		1490	9.8256	9.1732		1490	10.1811	9.6903
1491	9.9511	9.8305		1491	10.0309	9.4819		1491	10.3477	10.2218		1491	9.6411	9.3172		1491	10.2132	9.5856
1492	10.0059	9.8002		1492	9.6592	9.3064		1492	9.2839	9.7545		1492	9.9094	9.7799		1492	10.1151	9.8128
1493	10.1417	9.8925		1493	9.9876	9.7925		1493	10.1692	10.2383		1493	9.5845	8.8255		1493	10.7935	10.2927
1494	9.8578	9.8629		1494	10.2855	9.8905		1494	10.0818	10.0665		1494	9.9277	9.681		1494	10.3823	9.8373
1495	10.167	9.5302		1495	10.29	10.0164		1495	9.9373	9.7603		1495	9.8307	9.9885		1495	10.6547	10.4766
1496	9.2604	9.2374		1496	9.5344	9.4423		1496	10.0108	9.8714		1496	9.5492	9.445		1496	10.4566	9.7737
1497	9.5065	8.9719		1497	9.8455	9.1904		1497	9.9678	9.8129		1497	9.5198	9.4758		1497	9.9857	9.6358
1498	9.5425	9.1069		1498	10.1077	9.4324		1498	10.3287	10.1891		1498	9.1353	9.438		1498	10.9343	10.1139
1499	9.016	8.951		1499	9.9239	9.705		1499	9.9259	9.8887		1499	10.1954	9.8372		1499	10.8349	10.4406
1500	10.1557	9.7517		1500	9.9683	9.6306		1500	10.3265	9.9764		1500	9.224	9.7703		1500	10.8362	10.1656
1501	9.7658	9.3066		1501	9.437	9.1028		1501	9.9306	10.0278		1501	9.0369	9.3648		1501	10.4978	9.8105
1502	9.5637	9.7644		1502	9.4733	9.3256		1502	10.2418	9.9752		1502	9.0534	9.9656		1502	10.1528	9.7742
1503	9.3449	9.3582		1503	10.2457	9.6917		1503	9.6751	9.2032		1503	9.4916	9.688		1503	11.1216	10.2099
1504	9.4099	9.5586		1504	9.8941	10.0266		1504	10.3694	9.762		1504	9.2995	9.4604		1504	10.364	10.0234
1505	9.0559	8.9407		1505	10.003	9.6185		1505	10.004	9.9778		1505	10.4204	9.5711		1505	10.4454	10.1633
1506	9.2504	9.3204		1506	9.5407	9.4766		1506	10.141	9.6185		1506	9.0694	9.0752		1506	10.5587	9.4178
1507	10.0458	9.4258		1507	10.2759	9.7491		1507	9.9818	10.0663		1507	9.8249	10.0962		1507	10.2661	9.854
1508	10.0338	9.4451		1508	10.4148	9.7126		1508	10.1584	9.9419		1508	9.798	9.4011		1508	10.9741	9.7743
1509	9.932	9.7419		1509	10.192	9.5726		1509	9.7856	10.0965		1509	9.8585	9.0594		1509	10.4796	10.3331
1510	9.7137	9.2592		1510	10.1583	9.5311		1510	9.9424	10.0245		1510	9.1128	9.0676		1510	10.7618	10.1998
1511	9.3361	8.9973		1511	10.0157	9.5847		1511	9.8616	9.883		1511	9.5863	9.4711		1511	10.6968	9.2647
1512	9.8324	9.7489		1512	9.5735	9.4387		1512	10.3906	10.0649		1512	9.0862	8.9206		1512	10.5314	9.5853
1513	9.5301	9.1607		1513	9.6992	9.5616		1513	10.1534	9.8838		1513	9.5372	9.1927		1513	10.1816	9.6635
1514	9.502	9.752		1514	10.6157	9.6916		1514	9.7455	9.6334		1514	9.3771	9.2136		1514	10.5178	9.6295
1515	10.1299	9.9372		1515	9.7483	9.0958		1515	9.5543	9.4161		1515	9.119	9.1022		1515	10.453	9.9804
1516	9.2667	9.569		1516	10.1357	9.1006		1516	10.2379	10.2922		1516	9.3064	9.1746		1516	11.2347	10.0897
1517	9.8679	9.6937		1517	10.0724	9.0844		1517	10.2582	9.8924		1517	9.3541	9.6084		1517	10.9055	10.3426
1518	9.8336	9.5956		1518	9.9803	9.5124		1518	10.5845	9.9182		1518	9.5474	9.6441		1518	10.294	9.1648
1519	10.0011	9.4696		1519	10.1139	9.719		1519	9.4811	9.1919		1519	9.1549	9.149		1519	10.4493	9.7689
1520	9.6379	9.4763		1520	10.0211	9.4238		1520	8.9515	9.4117		1520	9.4223	9.7034		1520	10.6365	9.4955
1521	10.3579	10.0007		1521	10.2864	9.5005		1521	9.8454	9.5417		1521	9.0809	9.5887		1521	10.304	9.6065
1522	10.3376	9.6102		1522	10.002	9.4361		1522	9.7308	9.7522		1522	9.0797	9.2204		1522	10.5228	9.4135
1523	10.3942	9.7185		1523	10.0063	9.8571		1523	10.261	10.7096		1523	9.0549	9.1433		1523	10.2764	9.9613
1524	10.2988	9.547		1524	9.7721	9.3744		1524	10.1057	9.9283		1524	9.5002	9.3445		1524	10.5523	9.8
1525	10.2622	9.7149		1525	10.321	9.7222		1525	9.7827	10.4252		1525	9.5035	9.678		1525	9.4202	8.7383
1526	10.0866	10.0301		1526	10.2366	9.802		1526	9.8874	9.88		1526	9.37	9.2359		1526	10.2881	9.8485
1527	9.9339	10.1297		1527	10.006	9.6058		1527	10.1748	10.28		1527	10.5263	10.8515		1527	10.5711	9.552
1528	9.7905	10.1085		1528	9.4754	8.948		1528	9.9936	9.4857		1528	9.6712	9.7083		1528	10.1456	9.558
1529	10.0377	9.3997		1529	10.394	9.7949		1529	9.6948	9.7224		1529	9.5078	10.1403		1529	10.1328	9.2546
1530	10.0854	9.9708		1530	10.1032	9.7693		1530	9.708	9.6153		1530	9.5043	9.7037		1530	9.8134	9.5926
1531	10.0396	9.0992		1531	10.0654	9.6617		1531	9.7237	9.8502		1531	9.56	9.8544		1531	10.4348	10.0077
1532	9.3594	8.7991		1532	9.7978	9.4554		1532	9.8582	10.4088		1532	9.3969	9.8265		1532	10.9799	9.9056
1533	9.807	9.3098		1533	10.3785	10.0337		1533	9.9939	10.0464		1533	9.4781	9.7042		1533	10.5197	9.565
1534	10.4292	9.9488		1534	10.1622	10.1478		1534	9.7925	9.8461		1534	10.0627	9.8819		1534	11.0028	9.6526
1535	10.4492	9.5768		1535	10.8957	10.1124		1535	10.1135	10.1206		1535	9.6813	9.7523		1535	10.8296	9.6201
1536	10.2146	9.7768		1536	10.1432	10.0838		1536	9.6859	9.5654		1536	9.1458	9.3837		1536	10.5724	10.1066
1537	9.9878	9.643		1537	9.7063	9.79		1537	9.8121	9.7283		1537	9.6831	9.3043		1537	10.9341	9.7392
1538	10.0282	9.4413		1538	9.742	9.4774		1538	9.7968	9.5578		1538	9.3601	9.4842		1538	10.7371	9.842
1539	10.435	10.4076		1539	10.388	9.9731		1539	9.7516	10.1359		1539	9.7816	9.5468		1539	10.8849	10.0414
1540	10.2781	10.2399		1540	9.7983	9.2723		1540	9.7562	9.5586		1540	9.5093	9.3228		1540	10.6967	10.1709
1541	10.0127	9.9653		1541	9.4085	9.057		1541	9.4584	9.94		1541	9.688	9.6588		1541	10.8744	9.9655
1542	9.673	9.7252		1542	9.7712	9.2204		1542	10.2595	10.2398		1542	9.5011	9.8186		1542	11.2557	10.1879
1543	10.0211	10.1685		1543	9.4371	9.1962		1543	9.579	9.8806		1543	9.5121	10.2286		1543	10.8348	10.1327
1544	10.2103	9.9815		1544	9.9197	9.392		1544	9.9249	9.8471		1544	9.6585	10.0354		1544	10.78	10.1453
1545	10.4092	10.1229		1545	10.4288	9.8326		1545	10.2205	9.2817		1545	9.2699	9.8867		1545	11.0908	10.2142
1546	10.272	10.1498		1546	10.1827	9.4488		1546	10.0639	9.6734		1546	9.3367	9.5154		1546	10.3468	9.8804
1547	9.93	9.8539		1547	9.798	9.5126		1547	9.9785	9.6722		1547	9.4654	9.8562		1547	10.6913	10.3542
1548	10.1973	10.0204		1548	10.1631	9.5746		1548	9.9068	9.0699		1548	9.315	9.8948		1548	10.0449	9.7887
1549	9.8686	9.6691		1549	10.4472	9.7589		1549	9.7228	9.6594		1549	9.7744	10.0327		1549	10.5477	9.9781
1550	9.8472	9.7683		1550	10.0213	9.5822		1550	9.9009	9.621		1550	9.5989	9.8738		1550	10.7707	9.7509
1551	10.3423	10.166		1551	10.2849	9.8988		1551	9.1999	9.4183		1551	9.8836	10.1297		1551	10.6782	9.8343
1552	9.8074	9.726		1552	10.2928	9.9453		1552	9.3257	9.4004		1552	9.4764	9.7443		1552	10.5296	10.1101
1553	9.9337	9.8398		1553	10.0129	9.7371		1553	9.7286	9.2352		1553	9.3248	9.8663		1553	10.6903	10.0329
1554	10.1617	9.7174		1554	10.1973	9.9701		1554	10.0488	9.8144		1554	9.478	8.8709		1554	10.0955	9.6961
1555	10.2354	9.6729		1555	10.3713	9.7724		1555	9.8913	9.3242		1555	10.0265	9.5386		1555	10.695	10.1164
1556	10.488	10.8611		1556	9.5282	9.4492		1556	9.8822	10.2042		1556	10.176	9.7983		1556	10.7917	9.7202
1557	9.8134	9.6358		1557	10.5704	10.0702		1557	9.5492	9.631		1557	9.6619	9.1478		1557	10.6186	9.8087
1558	10.2611	10.1931		1558	9.9831	9.2862		1558	9.0683	9.2312		1558	9.6638	9.2769		1558	10.5166	9.8407
1559	10.3991	10.5958		1559	9.6689	9.5984		1559	10.1518	9.5657		1559	9.2777	9.3133		1559	11.0859	9.5971
1560	10.2582	9.4586		1560	9.553	8.7853		1560	9.5161	9.6232		1560	9.5811	9.2062		1560	10.7015	9.9924
1561	10.1792	9.9037		1561	9.9209	9.4173		1561	9.6157	9.6419		1561	9.0493	8.7019		1561	10.6337	9.9045
1562	10.2861	9.3717		1562	9.8692	9.3621		1562	9.8523	9.8652		1562	9.5068	9.784		1562	10.4197	9.6928
1563	9.9716	9.4495		1563	10.1019	9.3811		1563	9.6782	9.5666		1563	9.6676	9.071		1563	10.4566	9.8218
1564	10.0822	9.7053		1564	9.6278	9.1356		1564	9.8184	9.8846		1564	9.9178	9.1009		1564	10.2061	9.9912
1565	9.9718	9.6128		1565	10.1505	9.4757		1565	9.7992	9.4971		1565	9.957	9.7019		1565	10.2092	9.289
1566	10.1674	10.1414		1566	9.6151	9.2794		1566	10.2267	10.2691		1566	9.2978	9.0457		1566	10.0421	9.1812
1567	9.7308	9.8959		1567	10.1675	9.8626		1567	10.2668	9.9295		1567	9.6044	9.1011		1567	10.3439	9.8611
1568	9.7742	9.3371		1568	10.0573	9.8729		1568	9.9077	9.7472		1568	9.8849	9.2652		1568	9.935	9.441
1569	9.5915	9.2692		1569	10.5299	9.8552		1569	9.4343	9.2775		1569	9.4622	9.3508		1569	10.6248	9.856
1570	10.1341	9.9889		1570	10.2262	9.6918		1570	9.6509	9.4072		1570	9.4823	9.2051		1570	10.2233	9.4128
1571	10.0676	9.7137		1571	10.2156	9.7526		1571	9.9551	9.3684		1571	9.6099	9.098		1571	10.3506	9.5071
1572	9.9141	9.5313		1572	10.2011	10.0545		1572	9.6923	9.5029		1572	9.4642	9.0215		1572	10.2943	9.7603
1573	9.9261	10.0985		1573	10.5757	9.96		1573	9.6518	9.4841		1573	10.1301	9.6218		1573	9.8476	9.4253
1574	9.7973	10.0658		1574	10.0438	9.765		1574	9.5175	9.3494		1574	9.4676	9.4972		1574	10.5536	9.4393
1575	9.5021	9.5824		1575	10.3965	9.8975		1575	9.6126	9.2941		1575	10.12	9.2327		1575	10.5304	10.1416
1576	10.1066	9.9418		1576	10.022	9.7533		1576	8.9021	9.0858		1576	9.4681	9.1044		1576	10.3492	9.5842
1577	9.9512	10.1164		1577	10.4332	9.6113		1577	10.1671	10.009		1577	9.5839	9.3819		1577	10.6406	9.53
1578	10.199	9.7685		1578	10.2914	10.4273		1578	9.8956	9.8792		1578	10.1632	9.2348		1578	10.7446	10.0539
1579	9.8032	9.4768		1579	10.0811	9.9162		1579	9.7111	9.2244		1579	9.1321	9.1756		1579	10.3783	9.4355
1580	10.0718	9.9533		1580	10.5024	9.5708		1580	9.2641	9.2378		1580	9.8141	9.1972		1580	10.3849	9.8336
1581	9.9529	9.4471		1581	9.7483	10.0761		1581	9.9519	9.5742		1581	9.2799	8.8683		1581	10.6414	9.896
1582	10.201	9.4249		1582	10.4731	10.1678		1582	9.4445	8.983		1582	8.682	8.9049		1582	10.1512	9.213
1583	10.135	9.8707		1583	10.6566	9.724		1583	10.1396	9.7271		1583	9.8056	9.4414		1583	10.6466	10.1686
1584	10.2348	9.9978		1584	10.3337	9.3782		1584	9.5673	9.3603		1584	9.5746	9.2387		1584	10.7994	10.0427
1585	10.458	9.8269		1585	10.9168	9.484		1585	9.6665	9.4041		1585	9.6829	9.0518		1585	10.3978	9.4047
1586	9.9049	10.0988		1586	9.9292	9.4165		1586	9.5804	9.0986		1586	10.1203	9.4915		1586	10.3823	9.8936
1587	9.52	9.6963		1587	10.084	9.8221		1587	9.51	9.6114		1587	9.7968	9.8505		1587	10.433	9.7463
1588	9.696	9.4798		1588	10.1832	9.8445		1588	9.8631	9.3479		1588	9.8104	9.6292		1588	10.4823	10.0397
1589	10.1085	9.4317		1589	10.0708	9.6331		1589	9.6308	9.4316		1589	10.1313	9.5867		1589	11.1648	10.2422
1590	10.277	9.8695		1590	10.0005	9.7042		1590	9.5966	9.2487		1590	10.2421	9.6344		1590	10.7166	10.0087
1591	10.1088	9.882		1591	10.4719	9.5299		1591	9.4916	9.2989		1591	9.9754	10.0271		1591	10.658	9.6392
1592	10.0716	9.4173		1592	9.9311	9.8146		1592	10.0591	10.4787		1592	10.1421	9.7485		1592	11.0307	9.9364
1593	10.4147	10.0634		1593	10.5889	9.6492		1593	9.2153	9.479		1593	10.3425	9.887		1593	10.7784	10.3438
1594	10.3673	9.7295		1594	10.2441	9.6619		1594	9.3917	9.1865		1594	10.2127	9.8256		1594	10.1193	10.4305
1595	9.9532	9.5318		1595	9.8552	9.4077		1595	9.22	9.4217		1595	9.6551	9.7107		1595	10.379	10.4584
1596	10.167	9.9887		1596	10.5971	9.7395		1596	9.2804	9.2462		1596	9.6009	9.4223		1596	10.5152	10.0963
1597	10.429	9.6277		1597	10.4097	10.1601		1597	9.3612	9.6593		1597	10.0339	9.6196		1597	10.2119	9.8459
1598	9.7738	9.4437		1598	9.4181	8.9944		1598	10.1783	9.8357		1598	9.3871	9.9799		1598	9.9545	9.2734
1599	10.3694	9.8094		1599	9.9575	9.7137		1599	10.1636	9.7277		1599	9.3684	9.3915		1599	10.9682	10.2852
1600	9.6014	9.3218		1600	10.0013	9.2657		1600	9.681	9.3427		1600	10.1435	10.2967		1600	11.3459	10.6223
1601	9.9756	9.5135		1601	10.289	9.9945		1601	9.5526	9.4639		1601	9.2199	9.634		1601	10.3353	9.6322
1602	10.2653	9.6197		1602	10.4905	9.8075		1602	9.5175	9.5981		1602	10.1006	9.8155		1602	10.5952	10.0917
1603	10.2756	9.7012		1603	10.156	9.6465		1603	9.7083	9.3235		1603	9.71	9.6341		1603	10.1764	9.6941
1604	10.0305	9.5141		1604	9.9331	9.1541		1604	9.4262	9.4423		1604	10.0297	9.7867		1604	10.534	10.3192
1605	10.2556	9.871		1605	9.8298	9.4438		1605	9.9902	9.9341		1605	9.7109	9.619		1605	10.1605	10.0859
1606	10.2416	9.9347		1606	10.433	9.7221		1606	9.913	9.857		1606	9.9569	9.7751		1606	10.3642	10.368
1607	10.1495	9.7378		1607	10.3433	9.6016		1607	9.2572	9.3044		1607	9.4189	9.2033		1607	10.8224	10.5966
1608	9.4478	9.3185		1608	10.3813	10.096		1608	9.4521	9.4521		1608	9.7044	9.7642		1608	10.6431	10.1263
1609	9.7214	10.2144		1609	10.8674	10.0729		1609	10.2415	10.1096		1609	10.252	10.1209		1609	10.8234	10.0689
1610	10.2407	9.8454		1610	10.1318	9.9134		1610	10.0493	9.9397		1610	9.2754	9.2739		1610	10.5914	10.0491
1611	10.1776	9.8612		1611	9.9493	9.478		1611	10.3102	9.8897		1611	9.8417	10.5019		1611	10.8848	10.311
1612	10.0795	10.0752		1612	10.1575	9.1821		1612	10.0852	9.8753		1612	9.6152	9.4161		1612	10.3502	10.0455
1613	10.1438	10.1948		1613	10.9659	9.7639		1613	9.8351	9.7826		1613	9.6465	9.679		1613	10.8681	9.9181
1614	10.1315	10.0716		1614	11.2558	10.0289		1614	10.1886	9.8381		1614	9.6237	9.5479		1614	10.5558	10.0491
1615	10.2097	9.6521		1615	10.6235	9.424		1615	10.1992	9.8133		1615	10.3569	10.1081		1615	10.4354	9.8989
1616	10.3396	9.7485		1616	10.1313	9.7573		1616	9.5238	9.3321		1616	10.1961	9.9226		1616	11.5362	10.4556
1617	9.8874	9.8494		1617	10.6231	9.5516		1617	9.0812	9.4579		1617	9.3316	10.012		1617	10.9893	9.9857
1618	10.4679	9.9618		1618	9.9201	9.3916		1618	9.6265	9.5579		1618	9.285	9.7009		1618	10.6827	9.9099
1619	9.915	9.8876		1619	10.1758	9.6417		1619	9.86	9.662		1619	9.6895	9.7941		1619	10.6341	10.5316
1620	10.6814	10.318		1620	10.2957	9.8445		1620	9.4737	9.0972		1620	9.2624	9.4301		1620	9.9281	9.5374
1621	10.0059	9.5655		1621	10.5599	9.4738		1621	9.1088	9.5579		1621	9.8997	9.6141		1621	10.8251	10.8918
1622	10.3635	10.0128		1622	10.5045	9.701		1622	9.9771	9.5561		1622	10.0871	9.7202		1622	9.8782	9.8015
1623	10.4059	9.8758		1623	9.8612	9.3791		1623	9.8678	9.5433		1623	9.5158	9.3399		1623	11.263	10.5835
1624	10.0538	9.9837		1624	10.1059	9.7068		1624	10.1389	9.7477		1624	8.8819	8.9381		1624	10.419	10.5899
1625	9.9236	9.4994		1625	10.4257	9.7305		1625	9.8911	9.2634		1625	9.8348	10.0622		1625	10.8715	10.4311
1626	10.1989	9.7048		1626	9.9268	9.347		1626	10.4565	9.8778		1626	9.5658	10.0319		1626	10.7556	9.7033
1627	9.8674	9.7735		1627	9.8391	9.6157		1627	9.8272	9.5296		1627	9.2102	9.5342		1627	10.1927	10.2629
1628	9.4438	9.5226		1628	10.7378	9.9665		1628	10.2558	10.0669		1628	10.0986	9.8363		1628	10.8763	9.8853
1629	10.0916	9.6596		1629	10.5611	9.6275		1629	9.9697	9.8685		1629	9.789	9.2112		1629	10.5329	9.4732
1630	9.8235	9.5334		1630	10.1149	9.8631		1630	10.0678	9.8976		1630	9.4339	9.8877		1630	10.9293	9.6413
1631	10.2576	10.191		1631	9.796	9.3865		1631	9.6726	9.7356		1631	9.1957	9.3144		1631	10.8402	9.8141
1632	10.0129	10.101		1632	9.6315	9.3265		1632	10.1963	10.0614		1632	8.9094	9.1434		1632	10.3694	9.6283
1633	9.9463	10.1559		1633	9.8527	9.5157		1633	9.6028	9.3992		1633	9.6063	9.507		1633	10.3319	9.7946
1634	10.4184	9.9661		1634	10.1948	9.5165		1634	9.7642	9.5066		1634	9.0435	9.3308		1634	10.1042	9.3026
1635	9.9676	9.4761		1635	10.7323	9.6362		1635	9.885	9.6796		1635	9.0928	8.7893		1635	10.6047	9.3922
1636	10.0344	9.6576		1636	9.8736	9.8134		1636	10.4758	10.0877		1636	9.158	8.9339		1636	10.0214	9.783
1637	9.6639	9.577		1637	10.364	9.7139		1637	9.3782	9.4864		1637	9.6702	9.4736		1637	10.1996	9.4014
1638	9.654	9.3806		1638	9.9133	9.0386		1638	9.8276	9.7417		1638	9.6025	9.9901		1638	10.7983	10.1147
1639	9.7132	9.3551		1639	9.7971	9.5067		1639	9.8224	9.6905		1639	9.6891	9.5059		1639	10.5036	9.849
1640	9.7053	9.3522		1640	9.8242	9.5113		1640	10.35	9.6045		1640	9.5979	9.8731		1640	10.18	9.5371
1641	9.4083	9.2874		1641	10.388	9.8141		1641	9.8898	9.7259		1641	9.7115	10.14		1641	10.763	9.6138
1642	9.9156	9.1401		1642	10.1674	9.2722		1642	10.3675	9.5623		1642	9.1601	9.6512		1642	10.4618	10.2896
1643	9.9687	9.6279		1643	10.5406	9.429		1643	10.4	10.1344		1643	9.3306	10.2066		1643	10.6826	9.6026
1644	9.9872	9.86		1644	10.011	9.5186		1644	10.2597	10.1664		1644	9.8535	9.8772		1644	10.5705	9.8996
1645	10.4369	10.1301		1645	10.2372	9.6847		1645	10.1226	9.7312		1645	9.2884	9.999		1645	10.8302	9.426
1646	10.4409	9.899		1646	10.3853	9.7617		1646	10.3697	9.7991		1646	9.3596	9.5147		1646	10.5684	9.7437
1647	10.4616	9.8361		1647	9.7635	9.5866		1647	10.1245	9.5211		1647	9.3929	9.4102		1647	10.5122	9.8406
1648	9.7166	9.5436		1648	10.1832	9.4543		1648	10.0986	9.8039		1648	9.3706	8.942		1648	10.1825	9.184
1649	10.0603	9.9796		1649	10.1873	9.3926		1649	10.0941	10.1006		1649	9.4842	9.5451		1649	10.1178	9.0481
1650	9.9117	10.114		1650	10.3666	9.7681		1650	10.3321	10.2227		1650	9.9214	9.5842		1650	10.6359	9.4877
1651	10.1168	9.7996		1651	10.0509	9.6666		1651	9.4876	9.7451		1651	8.9941	8.8491		1651	10.7656	10.0523
1652	9.6795	9.5974		1652	10.2131	9.3593		1652	9.8684	9.6664		1652	9.4589	9.2694		1652	10.8954	9.7335
1653	9.4128	8.9759		1653	10.3357	9.325		1653	10.1518	9.4179		1653	9.7247	9.5248		1653	10.7087	9.5571
1654	10.1737	9.6509		1654	10.0176	8.9465		1654	9.7282	9.1778		1654	8.7663	8.9885		1654	10.8991	9.6415
1655	9.5535	8.9608		1655	10.5154	9.1958		1655	10.0483	9.9793		1655	9.3377	10.2417		1655	10.8342	9.4005
1656	9.698	9.3507		1656	10.5722	9.626		1656	10.118	10.0538		1656	9.3441	9.7342		1656	10.6047	10.6756
1657	9.8914	9.6441		1657	10.0444	9.3968		1657	10.2509	9.8328		1657	9.4755	9.7062		1657	10.9269	10.112
1658	10.1538	9.3946		1658	9.901	9.5859		1658	9.928	9.4804		1658	9.3984	9.5601		1658	10.6431	10.3049
1659	9.8063	9.6789		1659	9.7353	8.8592		1659	10.4049	9.7974		1659	9.6415	10.1873		1659	10.5112	10.2514
1660	9.3956	9.2056		1660	9.9812	9.0039		1660	9.4767	9.5413		1660	9.6955	9.0624		1660	10.2983	9.9494
1661	9.8338	9.423		1661	10.0806	9.3961		1661	9.5587	9.4013		1661	9.2231	9.1077		1661	10.6167	10.0771
1662	9.9029	9.5521		1662	10.0867	9.5137		1662	10.1912	10.097		1662	9.5211	9.4578		1662	10.6984	10.2621
1663	9.3464	9.1603		1663	10.8572	9.5912		1663	9.9549	9.7251		1663	9.3432	9.7329		1663	10.8251	11.1823
1664	9.8216	9.4204		1664	10.2416	9.811		1664	10.0556	9.6491		1664	9.5872	9.8152		1664	10.458	9.8053
1665	9.5915	9.1175		1665	9.7937	9.7512		1665	10.3275	9.8764		1665	9.7008	9.4641		1665	10.6861	10.1686
1666	10.2726	9.8503		1666	9.7039	9.6788		1666	9.6761	9.2473		1666	9.5246	9.3215		1666	10.8643	10.1529
1667	9.9	9.9878		1667	9.9108	9.6176		1667	9.7345	9.5339		1667	9.8799	9.1761		1667	10.5777	9.6387
1668	9.621	9.4641		1668	9.8526	9.3995		1668	10.3133	9.4843		1668	9.4419	9.5475		1668	10.5677	10.3511
1669	10.3789	9.3897		1669	10.0241	9.5928		1669	9.5166	9.3289		1669	9.4899	9.7193		1669	10.3328	10.0182
1670	9.5499	8.982		1670	10.1053	9.4075		1670	9.9958	9.7978		1670	9.9529	11.0458		1670	10.7161	9.8002
1671	9.5127	9.3053		1671	9.8747	9.6922		1671	9.4205	9.122		1671	9.952	10.4656		1671	9.9808	9.4226
1672	9.9392	9.5743		1672	10.1385	9.6384		1672	9.5736	9.5624		1672	9.6942	11.0793		1672	10.9057	10.1811
1673	9.7138	9.4394		1673	9.8392	9.6249		1673	9.6546	9.5642		1673	10.2312	11.0493		1673	10.4085	9.6864
1674	8.9739	9.1415		1674	9.9285	9.1813		1674	9.8519	9.7245		1674	9.7729	11.341		1674	10.4268	10.1229
1675	9.906	8.7267		1675	10.2507	9.155		1675	9.9393	9.9088		1675	9.7904	11.1469		1675	10.3843	9.8199
1676	9.747	9.5803		1676	10.0122	9.1147		1676	9.5426	9.7621		1676	9.8933	11.2477		1676	10.5663	9.5588
1677	9.9183	9.7507		1677	10.4834	9.66		1677	9.713	9.9599		1677	10.586	11.7216		1677	10.5864	9.6426
1678	9.551	9.4569		1678	9.6204	9.6865		1678	9.8537	9.6063		1678	10.3085	11.7004		1678	10.5401	9.9478
1679	9.546	9.4254		1679	9.7406	9.198		1679	9.5473	9.6942		1679	10.1135	10.6698		1679	10.7477	10.0842
1680	9.7428	9.1694		1680	10.1236	9.8508		1680	9.5371	9.8382		1680	10.0081	11.25		1680	10.7889	9.7693
1681	9.5701	9.4979		1681	9.96	9.2604		1681	9.8011	9.615		1681	9.8506	10.293		1681	10.5775	9.8981
1682	9.645	9.5235		1682	10.3321	9.6702		1682	10.3046	9.9761		1682	10.2721	11.2631		1682	10.8114	10.0488
1683	9.5816	9.3471		1683	10.3814	9.4193		1683	9.5704	9.6964		1683	9.9591	11.0971		1683	10.6032	10.2828
1684	10.0009	9.2841		1684	10.8388	9.7891		1684	9.7743	9.7963		1684	10.6601	11.498		1684	10.5944	10.1096
1685	9.7769	9.6096		1685	10.4967	10.0711		1685	10.2299	9.6829		1685	9.9618	11.3108		1685	10.9042	9.9266
1686	9.9566	10.023		1686	10.0089	9.4924		1686	9.7983	9.8203		1686	10.0676	10.9862		1686	10.5305	9.8449
1687	10.2528	9.9893		1687	10.0066	9.5362		1687	10.2008	9.5872		1687	9.8321	10.8041		1687	10.4881	9.9501
1688	9.6727	9.9194		1688	9.4799	8.8321		1688	9.3528	9.6079		1688	9.8573	10.7302		1688	10.38	9.8803
1689	10.1134	9.5547		1689	10.2901	9.4212		1689	9.3658	9.3162		1689	10.4348	10.6199		1689	10.7233	10.2926
1690	9.7776	9.346		1690	9.1887	8.9039		1690	9.817	9.8073		1690	10.0073	11.3189		1690	10.528	10.2718
1691	9.6151	9.2767		1691	10.5833	9.5131		1691	9.9546	9.9134		1691	10.3619	11.3429		1691	10.5326	10.4887
1692	9.9718	9.5369		1692	9.7757	9.5441		1692	9.3944	9.3246		1692	10.7205	11.5705		1692	10.2369	10.0139
1693	9.9465	9.9802		1693	9.8527	9.3125		1693	9.7791	8.7852		1693	10.3911	11.4128		1693	10.5697	9.9368
1694	10.0589	9.5456		1694	10.0729	9.6437		1694	10.1503	9.5524		1694	10.2751	11.3965		1694	10.5528	10.5962
1695	9.4377	9.0515		1695	10.1796	9.3599		1695	9.7151	10.0408		1695	9.9666	10.3488		1695	10.4723	10.417
1696	9.803	9.7737		1696	10.2269	9.1586		1696	10.0726	9.6384		1696	10.5753	10.4961		1696	10.2065	9.8326
1697	9.7525	9.6629		1697	10.3404	9.0462		1697	10.0021	9.7068		1697	9.5086	10.4587		1697	10.5902	9.875
1698	9.626	9.6372		1698	9.7152	8.739		1698	9.197	8.9596		1698	10.2295	10.1673		1698	10.3806	10.1551
1699	10.418	9.4199		1699	10.0268	9.098		1699	9.6899	8.829		1699	10.0375	10.7318		1699	10.7167	9.6303
1700	10.1678	9.8069		1700	9.9908	9.3548		1700	9.7575	9.1788		1700	9.6718	9.6138		1700	10.5315	9.6452
1701	9.8958	9.5856		1701	10.0214	9.1896		1701	9.58	9.5551		1701	9.2471	9.6584		1701	11.1734	10.0065
1702	9.3059	9.2869		1702	10.0718	9.128		1702	9.7744	9.6267		1702	9.8456	10.3957		1702	11.024	9.6436
1703	10.2944	9.7677		1703	10.1667	8.9537		1703	9.8794	9.6342		1703	9.3445	9.9075		1703	10.658	9.6493
1704	9.4725	9.6252		1704	9.881	9.6104		1704	10.0172	9.7854		1704	9.5421	9.9742		1704	10.2094	9.3413
1705	9.4166	9.6587		1705	10.2244	9.2799		1705	9.8547	9.9899		1705	9.9478	10.1109		1705	10.6633	9.7735
1706	9.2775	9.8842		1706	9.9255	8.7673		1706	10.1381	10.0556		1706	10.1412	10.1925		1706	10.7265	9.0593
1707	10.1318	10.3282		1707	10.1358	9.3123		1707	10.1622	9.6851		1707	9.8049	10.1834		1707	10.5617	9.7707
1708	9.8317	9.3467		1708	10.0594	8.9387		1708	9.9159	9.9301		1708	10.0993	10.3784		1708	10.5785	9.29
1709	10.2281	9.8575		1709	10.026	9.1956		1709	10.0789	9.7747		1709	9.8735	10.215		1709	10.405	9.2263
1710	9.8542	9.8344		1710	10.1388	9.1283		1710	9.7252	9.5195		1710	10.1839	10.2906		1710	10.753	10.0123
1711	10.2215	9.7881		1711	9.8924	8.9283		1711	9.7786	9.5075		1711	10.1057	10.0114		1711	9.9993	9.5783
1712	9.8306	9.5286		1712	10.4041	9.4044		1712	9.6886	9.2893		1712	10.1939	10.3176		1712	10.4851	9.5475
1713	9.7477	9.7255		1713	10.2994	9.1373		1713	9.9941	9.8148		1713	9.5646	9.5879		1713	10.1392	9.4608
1714	9.7699	9.3608		1714	9.9805	8.5629		1714	10.5807	10.0825		1714	9.7005	9.9124		1714	11.0058	9.9189
1715	9.4944	9.5549		1715	10.1749	9.1987		1715	10.1248	9.6666		1715	9.6657	9.5174		1715	10.5206	9.6962
1716	9.7764	9.6554		1716	10.6758	8.7926		1716	10.1573	9.8462		1716	10.2277	9.551		1716	10.0868	9.1904
1717	10.1639	9.8099		1717	10.251	9.2383		1717	9.8362	9.9316		1717	9.082	8.9308		1717	11.1858	9.6356
1718	9.4452	9.432		1718	10.2032	9.1419		1718	10.1533	9.6033		1718	9.7651	9.7013		1718	11.0023	9.7464
1719	9.9826	9.6677		1719	10.1531	9.3314		1719	9.807	9.6341		1719	9.5945	9.5014		1719	11.3071	9.6109
1720	9.6468	9.414		1720	10.3972	9.311		1720	9.5184	9.5093		1720	10.0351	9.9528		1720	10.4576	9.2057
1721	9.2628	9.1459		1721	9.8887	8.8807		1721	10.462	10.2356		1721	9.6138	9.3658		1721	10.8579	9.6757
1722	10.005	9.9362		1722	9.5798	8.7184		1722	9.8402	9.7605		1722	9.91	9.9281		1722	11.0949	9.6325
1723	9.8193	9.7419		1723	10.3257	9.3892		1723	9.7681	9.6227		1723	9.9443	10.1885		1723	11.2565	9.6897
1724	9.8134	9.8768		1724	9.9861	9.0661		1724	9.7258	9.7066		1724	9.7204	10.2396		1724	11.1803	9.5827
1725	9.6456	9.3416		1725	10.2377	9.4425		1725	9.5213	9.4691		1725	9.6553	9.7803		1725	10.7039	9.2493
1726	10.131	9.9035		1726	10.105	8.8933		1726	9.5998	9.6648		1726	9.3948	9.7877		1726	10.8901	9.3204
1727	10.139	9.5121		1727	10.1826	9.4881		1727	9.9006	9.7529		1727	9.7599	9.985		1727	11.1963	9.5951
1728	10.1001	9.5707		1728	9.8827	9.2958		1728	9.7701	9.3589		1728	9.7682	9.6069		1728	11.2685	9.344
1729	9.6872	9.1506		1729	10.5557	9.3067		1729	8.6255	8.8264		1729	9.3596	9.4781		1729	11.1484	9.772
1730	9.6708	9.8229		1730	9.7421	8.6639		1730	10.107	9.8609		1730	9.8824	9.4792		1730	10.994	9.6725
1731	10.1159	10.1799		1731	9.8334	8.9245		1731	9.815	9.6771		1731	9.4018	9.1246		1731	11.0309	9.6439
1732	9.548	9.7282		1732	10.7409	9.5973		1732	9.9634	9.5618		1732	9.5604	9.6574		1732	10.9259	9.4825
1733	9.5484	9.1375		1733	10.5941	9.198		1733	10.3691	9.7628		1733	9.7608	9.9144		1733	10.7645	9.6865
1734	9.8402	9.5048		1734	10.1693	9.1444		1734	9.7787	9.5973		1734	9.4364	9.0842		1734	10.5778	9.1749
1735	9.8978	9.2187		1735	10.0815	8.9		1735	10.2415	9.9979		1735	9.0308	9.1897		1735	10.7324	9.6731
1736	10.3091	10.0699		1736	10.8938	9.4098		1736	10.1169	9.4017		1736	9.0756	8.9552		1736	10.9307	9.8716
1737	10.1251	9.402		1737	10.1089	8.9736		1737	10.0581	9.7355		1737	9.2786	9.3147		1737	10.2616	9.8481
1738	9.1202	9.3035		1738	10.5216	8.7906		1738	9.8831	9.4281		1738	9.5072	9.4919		1738	10.8906	9.3499
1739	10.6065	10.1624		1739	10.1044	8.6812		1739	9.6474	9.1531		1739	9.9884	9.2972		1739	10.497	9.0747
1740	9.4292	9.0636		1740	10.1769	9.1651		1740	9.689	9.4348		1740	9.8183	9.8581		1740	10.452	9.0213
1741	10.5175	9.5489		1741	10.3645	9.3444		1741	9.9144	9.2014		1741	9.6867	10.0494		1741	10.5709	9.3529
1742	10.1004	9.7713		1742	10.6202	9.2863		1742	10.1111	9.4145		1742	9.8819	9.7486		1742	10.0495	10.0357
1743	9.7962	9.5251		1743	10.3333	9.1468		1743	9.9537	9.8311		1743	9.5102	9.1902		1743	10.4777	9.6767
1744	9.8931	9.8649		1744	10.6737	9.2113		1744	9.9882	9.3905		1744	10.2443	9.5723		1744	10.3984	9.5977
1745	9.9243	9.7782		1745	10.0473	8.9025		1745	10.0273	9.0945		1745	9.5332	9.379		1745	10.4985	9.3832
1746	9.8267	9.7236		1746	10.4026	9.1496		1746	9.9651	9.2973		1746	9.6664	9.7913		1746	10.6297	9.5827
1747	9.6154	9.108		1747	11.1513	9.1521		1747	10.1807	9.5545		1747	10.004	9.4874		1747	10.4368	9.1548
1748	9.8796	9.5402		1748	10.6284	9.1582		1748	9.3827	9.483		1748	9.5106	9.0537		1748	10.6362	9.1741
1749	9.7076	9.864		1749	10.2512	9.262		1749	9.4037	9.114		1749	10.1372	9.3961		1749	10.3981	9.3488
1750	9.809	9.4318		1750	10.0816	9.0274		1750	9.5466	9.0414		1750	9.9853	9.9567		1750	10.6218	9.5439
1751	10.2923	10.081		1751	9.658	8.9381		1751	9.8593	8.7029		1751	9.3625	9.3558		1751	10.4578	9.4534
1752	10.7545	9.8924		1752	10.757	8.8961		1752	10.0967	8.9263		1752	9.9821	9.6787		1752	10.7159	9.2797
1753	10.3539	10.7343		1753	10.0044	9.4		1753	9.7448	8.8648		1753	9.4252	9.5242		1753	10.8209	9.4911
1754	10.4477	10.2182		1754	9.7519	8.8257		1754	9.5755	9.3414		1754	10.1455	9.9187		1754	11.1474	9.8835
1755	10.52	10.0205		1755	10.0491	8.8455		1755	10.3678	9.4057		1755	10.1971	10.2612		1755	11.0243	9.7653
1756	10.8639	10.0372		1756	10.1624	9.1266		1756	10.1085	9.7472		1756	10.2189	10.2293		1756	11.2529	9.8191
1757	10.4106	10.1795		1757	9.7344	8.8063		1757	9.7829	9.4038		1757	9.926	10.102		1757	11.0872	10.0984
1758	10.117	9.8998		1758	9.9913	8.6523		1758	9.4925	9.1759		1758	10.3675	9.9057		1758	11.4174	9.6756
1759	9.652	9.7251		1759	10.1477	8.8725		1759	9.7215	9.648		1759	9.9633	10.2057		1759	11.0463	9.996
1760	10.5077	9.6456		1760	9.4278	8.5694		1760	9.8172	9.4495		1760	9.4821	9.6287		1760	11.2518	10.1334
1761	10.1003	10.1287		1761	9.8722	8.7619		1761	10.1444	9.7585		1761	9.6316	9.5316		1761	10.7664	9.6723
1762	10.6717	9.9274		1762	10.4641	9.0956		1762	10.2488	9.9052		1762	9.8138	9.8863		1762	10.4625	9.604
1763	10.1207	10.0169		1763	10.2858	9.0581		1763	10.0216	9.7519		1763	9.8166	9.704		1763	10.8191	9.6701
1764	10.5847	9.8703		1764	9.6388	8.8912		1764	10.1592	10.0558		1764	10.129	9.9687		1764	10.3225	8.8843
1765	9.8859	9.1487		1765	10.1437	9.2837		1765	9.7678	9.3017		1765	9.9428	9.8728		1765	11.0868	9.8708
1766	9.5972	9.3396		1766	10.2502	9.063		1766	9.7561	9.4006		1766	9.6271	9.5403		1766	10.7749	9.5084
1767	9.8314	9.3388		1767	10.0238	9.1624		1767	9.763	9.3483		1767	9.9048	9.648		1767	9.38	9.0209
1768	10.5188	9.9082		1768	10.1096	8.9233		1768	10.0066	9.7673		1768	9.1485	9.5474		1768	11.2683	9.7751
1769	10.2066	9.6976		1769	9.936	8.8846		1769	10.3536	10.0195		1769	9.6833	9.5712		1769	11.0238	9.9464
1770	10.2498	9.97		1770	9.7861	8.2861		1770	10.1301	9.811		1770	9.5229	9.4243		1770	11.1442	10.274
1771	9.8046	9.5335		1771	9.9018	8.7523		1771	9.6224	9.6579		1771	10.3775	10.0474		1771	11.758	10.2181
1772	9.7505	9.4372		1772	10.1416	9.0832		1772	9.904	9.3821		1772	9.6885	9.6234		1772	11.4845	10.1024
1773	9.5425	9.7219		1773	10.5372	9.1054		1773	10.0368	9.5686		1773	9.8813	10.4583		1773	10.906	9.7739
1774	9.4989	9.7268		1774	9.9571	8.7033		1774	10.2122	10.028		1774	10.1185	9.7782		1774	11.7175	10.7324
1775	9.2362	9.6725		1775	9.9568	9.0727		1775	10.099	9.2946		1775	10.0014	9.8235		1775	10.7583	9.9032
1776	9.2848	9.9785		1776	9.3988	8.7548		1776	9.9245	9.6266		1776	10.3016	10.1606		1776	11.2242	10.1341
1777	9.4446	10.0192		1777	9.8329	8.959		1777	10.0941	9.5935		1777	9.7441	9.6035		1777	11.3676	10.2658
1778	9.3938	9.8941		1778	10.2305	9.0546		1778	10.0238	9.3822		1778	9.908	9.51		1778	11.6497	10.3148
1779	9.0532	9.6224		1779	9.918	8.9106		1779	10.1276	9.9082		1779	9.6931	9.8806		1779	10.8695	9.3819
1780	9.2828	9.2516		1780	10.2602	9.3736		1780	9.3511	9.2325		1780	9.3891	9.197		1780	11.1449	10.2569
1781	9.8465	9.8813		1781	9.6829	8.6242		1781	10.0854	9.9368		1781	10.3147	9.6506		1781	11.3714	9.9281
1782	8.888	8.6356		1782	10.1907	8.8876		1782	9.6192	9.2958		1782	10.1517	9.8784		1782	11.6951	9.9733
1783	9.3253	9.3456		1783	10.0583	8.9816		1783	10.2738	9.7078		1783	9.9567	9.4388		1783	10.9837	10.3161
1784	10.341	9.931		1784	10.0639	9.2217		1784	10.134	9.4773		1784	10.328	10.1238		1784	11.3014	10.3155
1785	9.1701	9.3967		1785	10.4177	9.0223		1785	10.2913	9.3488		1785	9.5858	9.7575		1785	11.7133	10.0844
1786	9.0246	8.9445		1786	10.4751	8.9196		1786	9.3226	8.9997		1786	9.4974	8.8027		1786	11.8385	10.0242
1787	8.939	9.1358		1787	11.0183	9.3455		1787	10.3153	9.9037		1787	10.4287	9.923		1787	11.5339	9.6201
1788	9.2022	9.1885		1788	10.0569	8.8925		1788	10.3615	9.7827		1788	10.2498	9.9469		1788	11.5204	10.2874
1789	9.2914	9.697		1789	10.24	8.9782		1789	9.8811	8.9206		1789	10.0323	9.6288		1789	11.2699	10.0043
1790	9.1499	9.0933		1790	10.973	9.4639		1790	10.0291	9.3701		1790	9.3797	9.2594		1790	10.5923	9.2541
1791	9.4389	9.6832		1791	10.3685	9.2919		1791	9.6336	9.0536		1791	9.7101	9.7636		1791	10.689	9.6084
1792	9.6284	9.4512		1792	10.2249	9.311		1792	9.914	9.3864		1792	10.1967	10.0843		1792	11.2718	9.7581
1793	9.6257	9.5014		1793	9.9192	9.0439		1793	9.6627	9.5679		1793	9.8147	9.2332		1793	11.1827	9.8038
1794	9.452	9.5068		1794	10.0127	9.3919		1794	9.8887	9.4269		1794	10.0522	10.1487		1794	10.8058	10.0863
1795	9.1508	9.1107		1795	10.1684	9.205		1795	10.0181	9.7487		1795	9.4092	9.4455		1795	9.8756	9.2483
1796	9.2806	8.9015		1796	10.1802	8.9787		1796	9.8085	9.6578		1796	9.2523	9.5152		1796	10.2756	9.3892
1797	9.5962	8.985		1797	9.9084	8.7889		1797	9.1776	8.6477		1797	10.2738	9.6141		1797	10.9322	9.7071
1798	9.8828	9.9698		1798	10.378	8.756		1798	9.7179	9.1597		1798	9.8384	9.8625		1798	11.4948	9.6009
1799	9.5215	9.5656		1799	9.971	8.9836		1799	9.3852	8.781		1799	9.5327	9.6852		1799	11.3369	9.6927
1800	9.0075	8.901		1800	10.1549	9.224		1800	9.4887	9.1432		1800	9.8068	9.7164		1800	11.3558	10.1065
1801	9.7916	9.7723		1801	10.3881	9.4001		1801	10.0738	9.4111		1801	9.6894	9.8794		1801	10.5152	10.1517
1802	8.9792	9.5314		1802	10.5606	9.4809		1802	9.7392	9.6106		1802	10.0604	9.6726		1802	9.9066	9.3188
1803	8.9404	9.2262		1803	9.8504	8.9994		1803	9.5592	8.7788		1803	10.1173	9.8344		1803	11.0276	9.6125
1804	9.3006	9.3233		1804	10.2227	9.6446		1804	9.7256	9.6438		1804	9.939	9.6311		1804	10.7616	9.4154
1805	9.6475	9.4345		1805	10.7949	8.8355		1805	9.3322	9.0508		1805	10.198	9.849		1805	10.461	9.5316
1806	9.3284	9.2202		1806	10.4087	9.4517		1806	9.7592	9.4863		1806	9.6732	9.7867		1806	11.0264	9.5225
1807	8.9732	9.1408		1807	10.6821	9.1671		1807	10.092	9.5679		1807	9.839	9.9861		1807	10.7583	10.1533
1808	9.3245	9.6654		1808	10.3319	9.1339		1808	9.9904	9.908		1808	10.1248	10.1194		1808	10.5835	9.6544
1809	9.3375	9.4765		1809	9.9279	9.2936		1809	9.749	9.3465		1809	9.7921	9.9067		1809	10.3248	9.5359
1810	8.9242	8.9727		1810	10.2812	9.2783		1810	9.7727	9.6474		1810	9.3937	9.6125		1810	10.9424	9.9444
1811	9.863	8.9616		1811	9.9912	9.3731		1811	9.6357	9.6031		1811	9.7505	10.1789		1811	10.0105	9.2862
1812	9.8049	9.5599		1812	10.2034	9.2853		1812	9.3323	9.3793		1812	9.7856	9.5958		1812	10.4312	9.6229
1813	9.2071	9.3176		1813	10.3762	9.2357		1813	9.6191	9.2804		1813	9.8034	10.1295		1813	11.853	9.8632
1814	9.0898	8.7805		1814	10.7307	9.7184		1814	10.2788	10.007		1814	10.186	9.8685		1814	11.4248	10.1542
1815	9.0296	8.7475		1815	9.7128	9.3036		1815	10.069	9.5411		1815	10.0451	10.4209		1815	11.6756	9.8032
1816	9.1133	9.3267		1816	10.9254	9.7321		1816	8.9871	8.9161		1816	10.2129	9.5962		1816	11.6627	10.5513
1817	8.8782	9.276		1817	10.5392	9.2845		1817	9.7276	9.2164		1817	9.8094	9.8183		1817	11.5249	10.1811
1818	8.7663	8.8855		1818	10.1526	9.7549		1818	9.1934	9.108		1818	10.0941	9.9205		1818	11.303	10.1955
1819	9.1517	9.0773		1819	10.7555	9.1855		1819	9.3424	9.2981		1819	9.6015	10.0721		1819	11.1589	10.274
1820	9.1196	9.0874		1820	10.5917	9.7693		1820	9.6915	10.0266		1820	9.234	9.2765		1820	10.1879	9.5323
1821	9.1794	8.8742		1821	9.871	9.7389		1821	8.9523	8.8669		1821	9.6053	10.0315		1821	10.83	10.0292
1822	9.1218	9.049		1822	10.3166	9.9505		1822	9.4839	9.4144		1822	9.7479	9.2264		1822	10.1724	9.9529
1823	9.8488	9.7974		1823	10.0103	9.6243		1823	9.3746	9.5022		1823	9.1523	9.1556		1823	10.9543	9.9452
1824	9.3607	9.8188		1824	10.7431	9.1895		1824	8.914	9.3168		1824	9.2108	9.4038		1824	10.0021	9.9678
1825	10.1727	10.2281		1825	9.8188	9.5109		1825	9.3759	9.6289		1825	10.139	9.6921		1825	10.6697	9.6339
1826	9.932	9.6196		1826	10.9994	9.3584		1826	9.5428	9.3872		1826	9.9097	9.73		1826	11.0799	10.0553
1827	10.2958	9.8314		1827	10.2773	9.3179		1827	9.2052	9.1333		1827	9.2972	9.3369		1827	10.335	9.9149
1828	10.427	10.1397		1828	10.1283	9.9399		1828	8.9088	8.6185		1828	9.2367	9.4898		1828	9.5782	9.0235
1829	10.6736	9.6409		1829	9.4377	8.9875		1829	9.5701	9.6455		1829	9.1162	9.354		1829	10.895	9.5497
1830	10.5577	9.9345		1830	10.2788	9.8109		1830	9.3855	8.6637		1830	9.8087	9.9101		1830	10.0395	9.3265
1831	10.2696	9.9651		1831	10.0064	9.6676		1831	9.8473	9.3153		1831	9.7605	10.084		1831	9.9142	9.114
1832	9.7887	9.6869		1832	9.5562	9.0976		1832	9.5849	8.9168		1832	10.016	9.8594		1832	10.69	9.5785
1833	10.0865	9.462		1833	10.6498	9.3369		1833	9.5715	9.6524		1833	10.0107	9.3578		1833	10.7985	9.1922
1834	9.7326	9.8252		1834	10.194	9.7112		1834	9.0599	8.5019		1834	9.2762	9.1039		1834	10.511	9.2007
1835	10.4626	9.9503		1835	10.4993	9.6758		1835	9.212	8.8935		1835	9.5797	9.6268		1835	11.0324	8.9984
1836	10.1112	9.5636		1836	10.1262	10.0068		1836	9.857	9.4691		1836	9.2206	9.3097		1836	11.0695	9.4522
1837	10.016	9.7052		1837	10.0235	9.7127		1837	9.6599	9.5894		1837	9.2089	9.1108		1837	10.6144	9.7229
1838	10.2956	9.8019		1838	10.4272	9.8194		1838	9.14	8.9904		1838	9.2754	9.302		1838	10.0984	9.1022
1839	10.4427	9.6995		1839	10.4174	9.797		1839	10.5714	9.6017		1839	9.822	9.4534		1839	11.1146	9.5591
1840	9.9161	9.5987		1840	10.3268	10.0352		1840	10.5377	9.7082		1840	9.3225	9.4849		1840	10.6194	9.5028
1841	10.3932	9.9904		1841	10.6235	9.8297		1841	9.8802	9.5632		1841	9.2927	9.1997		1841	11.0808	9.6807
1842	10.2467	9.724		1842	9.9415	9.4718		1842	9.5818	9.6892		1842	9.3629	9.6114		1842	11.0588	9.2047
1843	10.2099	10.1851		1843	10.4059	9.7059		1843	10.1638	9.9285		1843	9.4635	9.6		1843	10.6769	9.1087
1844	10.2443	9.413		1844	10.4235	10.1828		1844	10.0619	9.5675		1844	9.1762	9.3076		1844	10.7343	9.617
1845	10.1252	9.1435		1845	10.3231	10.1591		1845	10.0554	10.0338		1845	10.004	9.6866		1845	10.97	9.7669
1846	10.0168	9.5679		1846	9.7612	9.1559		1846	10.2145	9.9543		1846	9.8246	9.6915		1846	10.5672	9.4805
1847	10.0166	10.1651		1847	10.2754	9.3473		1847	9.7615	9.4709		1847	9.9693	9.9222		1847	10.8976	9.4167
1848	9.5124	8.9002		1848	10.0679	9.3963		1848	9.866	9.5371		1848	9.2871	9.4172		1848	11.0881	9.6539
1849	9.8083	9.6846		1849	10.0667	9.9662		1849	9.6634	9.1577		1849	9.4486	9.5373		1849	10.4766	9.6487
1850	9.9069	9.7263		1850	10.5414	9.908		1850	9.761	9.3345		1850	9.7771	9.8416		1850	10.7948	10.1253
1851	9.5292	9.6001		1851	10.1001	9.5485		1851	9.4967	9.4697		1851	9.0674	9.2495		1851	10.6406	9.8541
1852	9.2428	9.2579		1852	10.2984	9.7162		1852	9.6064	9.6604		1852	9.7588	9.6261		1852	10.4218	9.4777
1853	10.0903	9.5917		1853	9.7465	9.5017		1853	9.8949	9.6272		1853	10.0689	9.8062		1853	10.1023	9.4872
1854	9.9679	9.5051		1854	10.2942	10.1542		1854	9.4544	9.4944		1854	9.6178	9.3855		1854	11.1674	10.1519
1855	9.7403	9.4896		1855	10.0702	9.9838		1855	10.0399	10.1803		1855	9.9865	9.966		1855	10.461	9.7193
1856	10.0444	9.7302		1856	10.6388	9.9734		1856	9.3044	9.4737		1856	10.1902	10.0643		1856	11.0177	9.73
1857	10.019	9.8354		1857	10.2582	9.9284		1857	9.7317	9.4204		1857	10.0997	9.5222		1857	10.6718	9.8296
1858	10.2956	10.2248		1858	10.2222	9.6242		1858	10.1116	9.7024		1858	10.2755	9.9294		1858	10.8423	9.4653
1859	9.7897	9.835		1859	10.2593	9.463		1859	9.2932	9.4419		1859	10.0957	9.9932		1859	10.7724	9.5354
1860	9.9443	9.8191		1860	10.4495	9.8499		1860	9.0747	9.1629		1860	10.0862	9.6126		1860	10.5408	9.152
1861	9.4451	9.4767		1861	10.0044	9.9736		1861	9.9457	9.7303		1861	9.7423	9.3928		1861	10.784	10.038
1862	9.8362	10.1415		1862	10.2387	10.0359		1862	9.7989	9.52		1862	10.1448	10.0557		1862	10.4615	9.2778
1863	9.9899	9.801		1863	10.2575	9.1611		1863	9.597	9.8565		1863	9.8846	9.6227		1863	11.0239	10.1733
1864	10.3362	9.8065		1864	10.9779	9.5746		1864	9.995	9.8519		1864	10.0183	9.645		1864	11.4076	10.6251
1865	10.3192	10.3663		1865	10.1309	9.9667		1865	9.6577	10.0627		1865	9.7769	9.1317		1865	11.5899	9.975
1866	10.3196	9.8505		1866	10.0901	9.5981		1866	9.4308	9.6173		1866	10.3621	9.6385		1866	11.2067	9.856
1867	9.535	9.2479		1867	10.5622	10.0359		1867	9.2411	9.3658		1867	10.1046	9.8075		1867	11.0579	9.8264
1868	9.583	9.4601		1868	10.1652	9.7224		1868	9.0795	9.0381		1868	10.2864	9.6813		1868	12.0257	9.9476
1869	10.3394	9.9622		1869	10.3442	9.4332		1869	9.7796	9.0244		1869	9.6635	10.0823		1869	11.2387	9.7484
1870	9.7204	9.5787		1870	10.1646	9.5219		1870	9.4115	9.4947		1870	10.6211	9.7714		1870	11.1219	9.5153
1871	10.2828	10.2933		1871	10.476	9.6927		1871	10.1571	10.0045		1871	9.69	10.0703		1871	11.3301	9.6209
1872	10.2266	9.6016		1872	10.0209	9.8769		1872	9.4758	9.3346		1872	9.9301	9.942		1872	11.0025	9.785
1873	9.8982	9.9657		1873	10.0406	9.7371		1873	9.6336	9.0266		1873	9.3333	9.1116		1873	10.9979	9.6081
1874	9.5276	9.5234		1874	10.0934	9.2315		1874	9.9041	9.5622		1874	8.9252	9.1387		1874	10.247	9.1524
1875	9.9636	9.8546		1875	10.6301	9.5491		1875	10.1706	9.846		1875	9.0864	8.7622		1875	10.728	9.3236
1876	10.0805	9.8242		1876	10.0301	9.1277		1876	10.4931	9.9174		1876	9.1504	9.0633		1876	11.6952	9.8158
1877	10.1758	10.0253		1877	9.8757	9.6912		1877	9.5368	9.8502		1877	8.9899	9.3867		1877	10.9903	9.3538
1878	10.3315	9.7054		1878	10.0768	9.6702		1878	10.0221	10.0569		1878	8.9703	8.9692		1878	12.1531	10.1015
1879	10.0543	10.3412		1879	10.4506	10.0192		1879	9.796	9.8621		1879	9.2199	9.5891		1879	11.2417	9.767
1880	10.0691	9.5089		1880	10.061	9.1785		1880	9.7854	9.8067		1880	8.7963	8.8775		1880	10.489	9.25
1881	9.9302	9.6855		1881	10.1851	9.3986		1881	9.6301	9.2109		1881	8.6731	9.5084		1881	10.6646	9.3739
1882	10.2421	9.6307		1882	10.344	9.4372		1882	10.1839	9.8938		1882	8.8735	8.4748		1882	10.3447	9.4638
1883	9.7089	9.8587		1883	10.4915	9.5932		1883	9.7195	9.2051		1883	9.5435	9.4152		1883	10.5815	9.4459
1884	9.8431	9.608		1884	10.0777	9.0425		1884	10.4442	9.9809		1884	9.2886	9.1321		1884	10.6995	9.5906
1885	10.2037	10.0243		1885	10.2682	9.0727		1885	9.196	9.0926		1885	9.5458	9.4413		1885	11.45	9.6976
1886	10.2222	9.4811		1886	10.1551	9.5998		1886	10.1422	10.2314		1886	9.227	9.3967		1886	11.0865	9.5818
1887	10.1032	9.974		1887	10.0421	9.9561		1887	10.3404	9.8024		1887	9.2302	9.1318		1887	11.1169	9.5962
1888	10.1276	9.6709		1888	9.9666	9.7969		1888	10.066	9.6111		1888	9.2947	9.1352		1888	11.1734	9.6048
1889	10.2008	9.7355		1889	10.7626	9.9026		1889	9.4164	9.8509		1889	9.7346	9.4741		1889	10.9752	9.0628
1890	10.347	9.7904		1890	9.9312	8.9716		1890	9.8077	9.7976		1890	9.2459	9.2737		1890	11.2094	9.834
1891	10.2774	9.9948		1891	10.1648	9.8605		1891	9.8518	9.5893		1891	9.493	9.2168		1891	10.9676	9.4772
1892	9.6591	9.5601		1892	10.1251	9.6664		1892	9.5761	9.4955		1892	8.7626	9.0313		1892	10.1644	8.9379
1893	10.0033	9.8441		1893	10.3997	9.7611		1893	9.393	9.3438		1893	9.4011	9.6373		1893	10.2406	8.7415
1894	10.1246	9.7198		1894	10.5475	10.2702		1894	9.3039	9.3142		1894	9.3584	9.3457		1894	10.0018	8.9977
1895	9.9998	9.7098		1895	10.1804	9.916		1895	9.9057	9.5222		1895	9.55	9.4817		1895	9.8624	8.727
1896	10.4913	9.743		1896	10.7862	10.2603		1896	9.2416	9.2273		1896	9.1467	9.0767		1896	10.875	9.4328
1897	10.0143	9.8203		1897	10.1239	9.5866		1897	9.3769	9.9043		1897	8.7962	8.9247		1897	9.7665	8.6955
1898	9.5136	9.5763		1898	10.1423	9.7423		1898	9.4568	9.8039		1898	9.1843	9.2068		1898	10.1211	8.8346
1899	9.7358	8.9936		1899	10.3184	9.744		1899	9.3049	9.5516		1899	8.7542	8.7986		1899	10.0495	8.5401
1900	9.6292	9.274		1900	10.2603	9.6194		1900	9.9393	9.4802		1900	8.7958	9.1653		1900	10.5794	9.4451
1901	10.0277	9.5665		1901	10.0673	9.7458		1901	9.5785	9.4459		1901	8.8437	9.0388		1901	11.5665	9.8954
1902	9.7075	9.486		1902	10.1874	10.0208		1902	9.1694	9.1523		1902	9.1121	9.6374		1902	10.3381	9.2823
1903	9.6196	9.2473		1903	10.0757	9.6524		1903	9.5124	9.7239		1903	9.0241	9.2515		1903	10.5439	9.537
1904	9.5579	9.673		1904	10.029	9.7436		1904	9.3945	9.227		1904	8.664	8.9857		1904	10.1307	9.2
1905	9.2295	9.1573		1905	9.7284	9.8388		1905	9.4866	9.5707		1905	9.6271	9.5729		1905	10.5823	9.1149
1906	9.2817	8.9954		1906	10.5581	9.539		1906	9.5811	9.1706		1906	9.2669	9.24		1906	11.4922	9.4264
1907	9.8431	9.4002		1907	10.3315	10.0669		1907	9.4654	9.4575		1907	8.9578	9.2072		1907	11.7403	9.5336
1908	10.309	9.8249		1908	10.1015	9.8953		1908	9.4237	9.4026		1908	9.162	9.2886		1908	11.2463	9.4138
1909	9.9301	10.0682		1909	10.3396	10.0303		1909	9.0038	9.3543		1909	9.9693	9.6193		1909	11.2536	9.3372
1910	10.0553	9.5526		1910	10.3015	9.8623		1910	10.3384	9.661		1910	9.4782	9.55		1910	10.7058	9.182
1911	9.9635	9.3449		1911	10.2877	9.7207		1911	10.1149	9.9751		1911	9.5027	9.6755		1911	11.0454	9.3498
1912	10.0242	9.4774		1912	10.3661	9.9071		1912	9.8173	9.4532		1912	9.1146	9.3712		1912	11.3278	9.4726
1913	10.2718	9.8505		1913	9.9823	9.6471		1913	9.8236	9.588		1913	9.4615	9.7192		1913	10.4608	9.1073
1914	10.2474	10.0236		1914	9.9278	9.388		1914	9.3981	8.9656		1914	9.5626	9.4202		1914	12.4858	9.988
1915	10.2215	10.1899		1915	10.9641	9.8511		1915	9.7598	10.0175		1915	9.2053	9.1984		1915	11.2761	9.6702
1916	9.9656	9.748		1916	10.513	9.3407		1916	10.1507	9.7951		1916	9.2405	9.5819		1916	11.0424	9.8441
1917	10.1113	10.1234		1917	9.9467	9.365		1917	10.0353	9.6673		1917	9.6761	9.6617		1917	11.1833	10.2182
1918	10.1584	9.3349		1918	9.938	10.0843		1918	9.9153	9.4656		1918	9.3942	10.023		1918	11.5177	9.7722
1919	9.5927	9.1549		1919	10.1588	9.7885		1919	9.7429	9.9276		1919	9.4319	9.7654		1919	10.892	9.7841
1920	10.1098	9.3439		1920	10.9619	9.8769		1920	9.8507	9.4773		1920	9.1767	9.2614		1920	11.0322	9.5361
1921	10.0785	9.754		1921	9.9651	9.9091		1921	10.2401	9.6968		1921	9.547	9.6526		1921	10.373	9.0231
1922	10.2968	9.7895		1922	10.0618	9.797		1922	9.6031	9.9251		1922	9.4801	9.5422		1922	10.6227	9.2808
1923	10.3109	9.5865		1923	11.0622	9.8232		1923	9.821	9.6259		1923	8.8793	9.6881		1923	10.7419	9.8933
1924	10.6028	9.9315		1924	10.2915	9.6003		1924	10.3352	10.3501		1924	9.0484	9.3689		1924	10.6658	9.4022
1925	10.4121	10.3623		1925	10.2113	9.7453		1925	9.2937	8.9711		1925	9.1012	9.3986		1925	10.3194	9.2297
1926	10.3004	9.8624		1926	10.4603	9.8175		1926	9.3213	9.3238		1926	8.8045	9.3135		1926	10.4754	8.9657
1927	10.3868	9.7446		1927	10.5018	10.1223		1927	9.9783	10.306		1927	9.3705	9.4969		1927	10.8178	9.2129
1928	10.8537	9.9256		1928	10.0372	9.6309		1928	9.9141	10.1216		1928	9.1603	9.67		1928	10.6808	9.1373
1929	10.1715	9.5339		1929	10.0592	9.6552		1929	10.1932	10.1926		1929	8.8792	9.1053		1929	11.3208	9.8528
1930	10.4894	10.1385		1930	10.4293	9.6461		1930	9.9071	10.1196		1930	8.9138	9.3061		1930	10.3062	9.3495
1931	10.1869	10.038		1931	10.1748	9.673		1931	9.8465	9.9464		1931	9.6945	9.9927		1931	10.4628	9.3347
1932	10.163	9.9496		1932	10.3153	10.3455		1932	9.7157	10.0687		1932	9.279	9.8016		1932	10.6796	9.2996
1933	10.5472	9.9533		1933	10.0238	9.3301		1933	9.0321	8.9581		1933	9.6272	9.9825		1933	10.715	9.4711
1934	10.0105	10.1698		1934	9.6741	9.4086		1934	10.1075	9.8957		1934	9.7293	10.1482		1934	10.5933	9.39
1935	9.9655	10.0683		1935	10.1873	9.7822		1935	9.702	9.9793		1935	9.345	8.8223		1935	10.2443	9.1677
1936	10.1401	9.7045		1936	9.8249	10.148		1936	10.068	9.6981		1936	9.9041	9.5834		1936	11.0889	9.646
1937	10.4354	9.6125		1937	10.0466	9.5335		1937	10.4554	10.0691		1937	9.6539	9.7361		1937	11.241	9.8208
1938	10.3955	9.9305		1938	9.3911	9.0961		1938	10.1065	9.7786		1938	10.0652	9.9617		1938	10.445	9.4441
1939	9.6565	9.3631		1939	9.9129	9.4132		1939	9.8071	9.94		1939	10.0442	9.7256		1939	10.0486	9.2159
1940	10.4316	9.8371		1940	10.3639	9.9822		1940	10.2332	9.8775		1940	10.1658	10.0644		1940	10.066	9.1877
1941	9.5919	9.3356		1941	9.8515	9.3497		1941	9.929	9.9181		1941	10.2048	10.1195		1941	10.0121	8.8332
1942	10.053	9.5529		1942	9.8148	9.5472		1942	9.612	9.7439		1942	10.1574	10.0137		1942	10.4631	9.3812
1943	10.3848	10.1256		1943	10.0954	9.7215		1943	9.886	9.7742		1943	10.1313	9.6376		1943	10.3058	8.9121
1944	10.3642	10.0049		1944	10.3309	9.6314		1944	9.7104	9.7629		1944	10.201	10.2913		1944	10.6802	9.7191
1945	10.557	9.4908		1945	10.2829	9.9578		1945	9.0958	9.6882		1945	9.8834	10.3518		1945	10.6207	9.6175
1946	9.6876	9.7194		1946	10.1311	9.8179		1946	10.0081	9.9058		1946	10.0342	9.8635		1946	10.5494	9.6846
1947	9.54	9.3731		1947	10.0874	9.792		1947	9.5167	9.4127		1947	10.0948	10.0071		1947	10.1717	9.3197
1948	9.8562	9.845		1948	10.311	10.0055		1948	9.9962	10.2461		1948	10.4727	9.8059		1948	9.8574	9.3711
1949	9.5532	9.7635		1949	10.0343	9.6409		1949	9.5584	9.4585		1949	10.2455	9.8862		1949	11.3541	9.8836
1950	9.852	9.9017		1950	10.1485	9.6628		1950	9.578	9.2632		1950	10.0147	9.9428		1950	10.9368	9.5369
1951	9.9865	10.1312		1951	9.6589	9.6058		1951	9.5509	9.7252		1951	9.2751	9.6579		1951	10.632	9.5149
1952	9.5762	9.4232		1952	9.8925	9.2526		1952	9.7184	10.2383		1952	10.1882	9.88		1952	10.6648	9.975
1953	10.3469	9.7094		1953	9.3883	9.4211		1953	9.104	9.6627		1953	10.1038	10.1098		1953	11.0107	9.4357
1954	10.0737	10.3008		1954	10.273	9.6866		1954	9.2203	9.0069		1954	10.0899	9.5902		1954	10.7192	9.467
1955	9.9138	9.8871		1955	9.8321	9.526		1955	9.5974	9.6024		1955	9.9601	10.0577		1955	10.8295	9.2035
1956	10.2109	10.3882		1956	9.6591	9.6261		1956	9.3237	9.5283		1956	9.5377	9.5256		1956	10.3981	9.5823
1957	10.2601	10.0883		1957	9.8665	9.6633		1957	9.2235	8.7814		1957	9.5443	9.2489		1957	10.5994	9.3182
1958	9.9115	10.2117		1958	9.876	9.7292		1958	9.8355	9.6423		1958	10.3094	9.8975		1958	10.5579	9.1699
1959	10.1116	9.9151		1959	9.4961	9.5154		1959	9.5618	9.5998		1959	9.6826	9.2697		1959	10.9946	9.9521
1960	10.3091	9.9125		1960	9.7068	9.6871		1960	9.9521	9.7681		1960	10.0286	9.8639		1960	10.5812	9.9344
1961	10.2895	9.6839		1961	10.1778	9.7363		1961	9.3182	9.4169		1961	9.93	10.4282		1961	11.1057	10.1731
1962	10.2525	9.9714		1962	10.0847	10.0029		1962	9.5027	9.414		1962	10.0701	9.8772		1962	10.9971	9.9511
1963	10.2408	9.8581		1963	9.8971	9.7258		1963	9.288	9.1845		1963	10.1868	10.1069		1963	11.3463	9.5029
1964	9.8483	9.9156		1964	10.177	9.8066		1964	10.1773	9.9337		1964	9.3925	9.2105		1964	10.594	9.4733
1965	10.1716	10.0815		1965	10.0986	9.7991		1965	9.8786	9.8672		1965	9.9156	9.7182		1965	10.8333	9.8078
1966	10.1594	10.4531		1966	10.2391	9.4894		1966	9.9518	10.1219		1966	9.3979	8.9686		1966	11.1582	9.6751
1967	9.8417	9.6633		1967	9.6696	9.5081		1967	10.3513	10.3401		1967	9.349	9.0272		1967	9.7971	8.6658
1968	9.9027	9.5285		1968	9.6062	9.4027		1968	10.1054	9.7259		1968	9.8216	9.7988		1968	9.9175	8.5745
1969	10.2004	9.8667		1969	9.8982	9.4609		1969	10.0188	9.9157		1969	9.6708	9.8113		1969	11.1867	9.3258
1970	10.506	9.8445		1970	9.1947	9.3771		1970	9.768	9.6793		1970	9.2721	9.5768		1970	10.1845	9.2594
1971	9.7623	9.4934		1971	9.5741	9.1646		1971	10.1561	9.8724		1971	10.037	10.1559		1971	10.1104	8.5196
1972	10.392	10.0299		1972	10.1475	10.0437		1972	10.1098	9.9386		1972	9.9043	9.9518		1972	10.285	9.2622
1973	10.5626	9.8329		1973	9.8523	9.3064		1973	10.0971	9.8491		1973	9.8021	9.4598		1973	9.8229	8.3734
1974	10.3023	9.8708		1974	9.3738	9.4582		1974	10.0885	9.845		1974	10.2107	9.9144		1974	11.0327	9.5054
1975	9.9565	9.7724		1975	9.7159	9.5464		1975	10.6767	9.7626		1975	9.8787	9.7255		1975	10.0264	8.8188
1976	10.3543	9.6284		1976	10.0034	9.6548		1976	10.2165	9.4513		1976	9.5001	9.2991		1976	9.4394	8.4885
1977	10.147	10.164		1977	9.907	9.7534		1977	10.2051	9.8217		1977	10.1334	9.9068		1977	10.991	9.0987
1978	9.8546	10.1032		1978	9.6899	9.5582		1978	10.0225	9.7505		1978	10.1045	9.981		1978	10.6337	9.3024
1979	9.8138	9.5786		1979	10.0024	10.3123		1979	9.859	9.8347		1979	9.6111	9.5951		1979	10.088	9.0708
1980	10.2851	9.8571		1980	9.3049	9.1798		1980	9.6158	9.8874		1980	9.8202	9.8741		1980	10.607	9.4162
1981	10.4243	10.0395		1981	9.2846	9.4936		1981	10.5535	9.9082		1981	10.5266	9.9317		1981	10.4129	9.6237
1982	10.336	10.1925		1982	9.6404	9.8623		1982	9.9444	9.9668		1982	10.1684	10.0877		1982	10.6662	9.6255
1983	10.625	9.4856		1983	9.6905	9.5816		1983	9.7298	9.6313		1983	9.9	9.9362		1983	11.0789	9.5518
1984	10.1819	9.8109		1984	9.3737	9.5515		1984	10.2028	9.8456		1984	9.4854	9.4599		1984	10.8738	9.7
1985	10.3012	10.6232		1985	9.8201	9.7171		1985	10.3519	9.7525		1985	9.3516	9.8634		1985	11.2812	9.677
1986	10.1524	9.9381		1986	9.344	9.3694		1986	9.8959	9.9057		1986	9.7803	9.8165		1986	11.1522	9.3985
1987	10.1185	10.2834		1987	9.7449	9.8907		1987	10.4118	10.1682		1987	10.1218	10.0065		1987	10.7292	9.625
1988	9.9743	9.922		1988	9.9853	9.7099		1988	9.8967	10.0018		1988	9.7784	9.514		1988	11.4729	9.7048
1989	10.1327	10.0506		1989	10.1521	9.6807		1989	9.8421	9.4611		1989	10.0069	10.0825		1989	10.7932	9.7511
1990	9.7417	9.7941		1990	9.7388	9.9107		1990	10.3232	9.9616		1990	9.4861	9.8357		1990	11.6357	10.0632
1991	9.1607	8.9802		1991	10.5315	9.9656		1991	10.1495	9.8272		1991	9.4889	9.723		1991	10.5254	9.558
1992	9.2094	9.0548		1992	9.8977	9.6179		1992	9.844	10.0468		1992	9.7892	9.7226		1992	10.8485	9.6876
1993	9.6882	8.8426		1993	10.2451	9.8137		1993	9.886	9.3337		1993	9.8772	9.6852		1993	10.6266	9.0322
1994	9.9826	9.73		1994	10.0505	9.9017		1994	9.7437	9.509		1994	9.7192	9.5859		1994	10.9962	9.6861
1995	10.0983	9.945		1995	10.2356	9.8404		1995	10.4636	9.4669		1995	9.8434	9.8819		1995	11.2677	9.5229
1996	9.7882	9.389		1996	10.0375	9.4523		1996	9.8016	9.188		1996	10.409	10.073		1996	10.8327	9.6954
1997	9.8418	9.4418		1997	9.6904	9.4359		1997	9.9013	9.5376		1997	9.3287	9.3725		1997	10.4579	9.1723
1998	10.6045	10.5032		1998	10.1876	9.7762		1998	9.4985	9.2741		1998	9.8636	9.7206		1998	10.9526	10.0058
[truncated: 68,004 more rows]

## Sheet: Table 1
	Residue	Location	Internal			van der Waals			Electrostatic			Polar Solvation			Non-Polar Solv.			TOTAL
			Avg.	Std. Dev.	Std. Err. of Mean	Avg.	Std. Dev.	Std. Err. of Mean	Avg.	Std. Dev.	Std. Err. of Mean	Avg.	Std. Dev.	Std. Err. of Mean	Avg.	Std. Dev.	Std. Err. of Mean		Std. Dev.	Std. Err. of Mean
dibC-bound system	K579	R LYS 51	0	0	0	-1.55706	1.16943	0.116943	-101.536	7.41344	0.741344	98.7613	6.20108	0.620108	-0.648087	0.0616961	0.00616961	-4.98004	1.56037	0.156037
	D590	R ASP 62	0	0	0	-0.42541	0.198521	0.0198521	10.4057	4.57313	0.457313	-9.53775	4.56218	0.456218	-0.0498765	0.0497718	0.00497718	0.392674	0.316268	0.0316268
	E755	R GLU 227	0	0	0	-1.46005	0.879899	0.0879899	-24.096	3.84499	0.384499	25.8279	3.93981	0.393981	-0.411346	0.0763347	0.00763347	-0.139536	0.81722	0.081722
AZ938-bound system	K579	R LYS 54	0	0	0	-2.2598	1.12948	0.112948	-101.143	9.71106	0.971106	98.7741	7.66323	0.766323	-0.659396	0.0563878	0.00563878	-5.28805	2.06053	0.206053
	D590	R ASP 65	0	0	0	0.17069	0.873585	0.0873585	-8.11253	3.49337	0.349337	6.1565	3.18303	0.318303	-0.16215	0.0238851	0.00238851	-1.94749	0.757678	0.0757678
	E755	R GLU 230	0	0	0	-2.53701	0.972205	0.0972205	-32.3111	3.28933	0.328933	33.3843	3.06583	0.306583	-0.566443	0.0290217	0.00290217	-2.03028	1.22362	0.122362
cor-bound system	K579	R LYS 54	0	0	0	-1.52566	1.02445	0.102445	-93.9917	5.62127	0.562127	90.3956	4.4875	0.44875	-0.710472	0.0701217	0.00701217	-5.8322	1.40774	0.140774
	D590	R ASP 65	0	0	0	-0.36455	0.607654	0.0607654	-27.3032	8.65989	0.865989	27.1395	8.35034	0.835034	-0.154325	0.0561437	0.00561437	-0.682515	0.705312	0.0705312
	E755	R GLU 230	0	0	0	-2.40195	0.775787	0.0775787	-62.7078	5.54861	0.554861	63.053	5.44268	0.544268	-0.543073	0.056898	0.0056898	-2.59979	1.01602	0.101602
pred-bound system	K579	R LYS 54	0	0	0	-2.06311	0.96552	0.096552	-85.0633	9.44487	0.944487	83.5545	7.97239	0.797239	-0.626249	0.0832622	0.00832622	-4.19819	1.74523	0.174523
	D590	R ASP 65	0	0	0	0.1299	0.887246	0.0887246	-23.4155	10.3062	1.03062	21.9184	8.57043	0.857043	-0.0909678	0.0571999	0.00571999	-1.45816	1.75429	0.175429
	E755	R GLU 230	0	0	0	-1.11735	0.685659	0.0685659	-44.8887	11.184	1.1184	45.9673	10.6066	1.06066	-0.400735	0.0630949	0.00630949	-0.439455	1.037	0.1037
dex-bound system	K579	R LYS 54	0	0	0	-2.20978	0.930563	0.0930563	-88.9282	7.53416	0.753416	88.8978	6.75973	0.675973	-0.618269	0.0850017	0.00850017	-2.8585	1.30663	0.130663
	D590	R ASP 65	0	0	0	-0.08692	0.517211	0.0517211	-3.50138	10.8613	1.08613	2.78626	9.42495	0.942495	-0.0832496	0.0598648	0.00598648	-0.88529	1.36585	0.136585
	E755	R GLU 230	0	0	0	-2.3275	0.727075	0.0727075	-20.9458	5.64908	0.564908	22.4028	5.33068	0.533068	-0.504468	0.0734768	0.00734768	-1.37492	1.35348	0.135348

## Sheet: Fig5B
dex-bound system					AZ938-bound system					pred-bound system					cor-bound system					dibC-bound system
Residue	Mean of TOTAL	Std. Dev.	Std. Err. of Mean		Residue	Mean of TOTAL	Std. Dev.	Std. Err. of Mean		Residue	Mean of TOTAL	Std. Dev.	Std. Err. of Mean		Residue	Mean of TOTAL	Std. Dev.	Std. Err. of Mean		Mean of TOTAL	Mean	Std. Dev.	Std. Err. of Mean
ASP 590	-0.88529	1.36585	0.136585		ASP 590	-1.94749	0.757678	0.0757678		ASP 590	-1.45816	1.75429	0.175429		ASP 590	-0.682515	0.705312	0.0705312		ASP 590	0.392674	0.316268	0.0316268
ASP 591	-0.09739	0.0510956	0.00510956		ASP 591	-0.06497	0.0454789	0.00454789		ASP 591	-0.12539	0.0447564	0.00447564		ASP 591	-0.16977	0.0606221	0.00606221		ASP 591	-0.03733	0.0404275	0.00404275
GLN 592	-0.639395	0.339492	0.0339492		GLN 592	-0.675057	0.199153	0.0199153		GLN 592	-0.228551	0.249764	0.0249764		GLN 592	-0.284583	0.293106	0.0293106		GLN 592	-0.274183	0.218246	0.0218246
TRP 577	-0.04824	0.0252915	0.00252915		TRP 577	-0.03727	0.0195821	0.00195821		TRP 577	-0.06579	0.0223992	0.00223992		TRP 577	-0.04872	0.0226005	0.00226005		TRP 577	-0.04481	0.0233674	0.00233674
ALA 578	-0.0935286	0.0769614	0.00769614		ALA 578	-0.157397	0.0915917	0.00915917		ALA 578	-0.193011	0.0937182	0.00937182		ALA 578	-0.153328	0.098793	0.0098793		ALA 578	-0.0662821	0.0454196	0.00454196
LYS 579	-2.8585	1.30663	0.130663		LYS 579	-5.28805	2.06053	0.206053		LYS 579	-4.19819	1.74523	0.174523		LYS 579	-5.8322	1.40774	0.140774		LYS 579	-4.98004	1.56037	0.156037
ALA 580	-0.125387	0.119423	0.0119423		ALA 580	-0.088602	0.0949221	0.00949221		ALA 580	-0.0887802	0.0376435	0.00376435		ALA 580	-0.0644159	0.0258195	0.00258195		ALA 580	-0.109225	0.066277	0.0066277
ILE 581	0.0072	0.00794858	0.000794858		ILE 581	-0.00157	0.0137733	0.00137733		ILE 581	0.00256	0.00883326	0.000883326		ILE 581	-0.01005	0.0135435	0.00135435		ILE 581	0.01033	0.00822685	0.000822685
LEU 753	-0.15062	0.048712	0.0048712		LEU 753	-0.2096	0.0607315	0.00607315		LEU 753	-0.05301	0.0178295	0.00178295		LEU 753	-0.09046	0.022718	0.0022718		LEU 753	-0.07614	0.0240146	0.00240146
ALA 754	-0.01984	0.0362021	0.00362021		ALA 754	-0.03377	0.0359947	0.00359947		ALA 754	-0.00979	0.0147528	0.00147528		ALA 754	-0.03221	0.0209295	0.00209295		ALA 754	-0.04922	0.0181067	0.00181067
GLU 755	-1.37492	1.35348	0.135348		GLU 755	-2.03028	1.22362	0.122362		GLU 755	-0.439455	1.037	0.1037		GLU 755	-2.59979	1.01602	0.101602		GLU 755	-0.139536	0.81722	0.081722
ILE 756	-1.72718	0.327669	0.0327669		ILE 756	-2.44376	0.398026	0.0398026		ILE 756	-0.543318	0.235444	0.0235444		ILE 756	-0.890095	0.176464	0.0176464		ILE 756	-0.807257	0.335621	0.0335621
ILE 757	-0.02531	0.0160902	0.00160902		ILE 757	-0.08216	0.0294298	0.00294298		ILE 757	-0.01457	0.0077463	0.00077463		ILE 757	-0.02193	0.0170864	0.00170864		ILE 757	-0.03025	0.0120294	0.00120294

## Sheet: Fig5E
3.5	3.5	3.5	3.5	3.5	3.5	3.5	3.5	3.5	3.5	3.5	3.5	3.5	3.5	3.5	3.5	3.5	3.5	3.5	3.5	3.5	3.5	3.5	3.5	3.5	3.5	3.5	3.5	3.5	3.5	3.5	3.5	3.5	3.5	3.5	3.5	3.5	3.5	3.5	3.5	3.5	3.5	3.5	2.44007	3.5	3.5	3.5	3.5	3.5	3.5
3.5	3.5	3.5	3.5	3.5	3.5	3.5	3.5	3.5	3.5	3.5	3.5	3.5	3.5	3.5	3.5	3.5	3.5	3.5	3.5	3.5	3.5	3.5	3.5	3.5	3.5	3.5	3.5	3.5	3.5	3.5	3.5	3.5	3.5	3.5	3.5	3.5	3.5	3.5	3.5	3.5	3.5	3.5	3.5	3.5	3.5	2.44007	3.5	3.5	3.5
3.5	3.5	3.5	3.5	3.5	3.5	3.5	3.5	3.5	3.5	3.5	3.5	3.5	3.5	3.5	3.5	3.5	3.5	3.5	3.5	3.5	3.5	3.5	3.5	3.5	3.5	3.5	3.5	3.5	3.5	3.5	3.5	3.5	3.5	3.5	3.5	3.5	3.5	3.5	3.5	3.5	3.5	3.5	3.5	3.5	3.5	3.5	3.5	3.5	3.5
3.5	3.5	3.5	3.5	3.5	3.5	3.5	3.5	3.5	3.5	3.5	3.5	3.5	3.5	3.5	3.5	3.5	3.5	3.5	3.5	3.5	3.5	3.5	3.5	3.5	3.5	3.5	3.5	3.5	3.5	3.5	3.5	3.5	3.5	3.5	3.5	3.5	3.5	3.5	3.5	3.5	3.5	3.5	3.5	3.5	3.5	3.5	3.5	3.5	2.44007
3.5	3.5	3.5	3.5	3.5	3.5	3.5	3.5	3.5	3.5	3.5	3.5	3.5	3.5	3.5	3.5	3.5	3.5	3.5	3.5	3.5	3.5	3.5	3.5	3.5	3.5	3.5	3.5	3.5	3.5	3.5	3.5	3.5	3.5	3.5	2.44007	3.5	3.5	3.5	3.5	2.44007	3.5	3.5	2.44007	3.5	3.5	3.5	3.5	3.5	3.5
3.5	3.5	3.5	3.5	3.5	3.5	3.5	3.5	3.5	3.5	3.5	3.5	3.5	3.5	3.5	3.5	3.5	3.5	3.5	3.5	3.5	3.5	3.5	3.5	3.5	3.5	3.5	3.5	3.5	3.5	3.5	3.5	3.5	3.5	3.5	3.5	3.5	3.5	3.5	3.5	3.5	3.5	2.44007	3.5	3.5	3.5	3.5	3.5	3.5	3.5
3.5	3.5	3.5	3.5	3.5	3.5	3.5	3.5	3.5	3.5	3.5	3.5	3.5	3.5	3.5	3.5	3.5	3.5	3.5	3.5	3.5	3.5	3.5	3.5	3.5	3.5	3.5	3.5	2.44007	2.44007	3.5	3.5	3.5	3.5	3.5	3.5	3.5	2.02698	2.44007	3.5	3.5	3.5	3.5	3.5	3.5	3.5	2.44007	3.5	3.5	2.44007
3.5	3.5	3.5	3.5	3.5	3.5	3.5	3.5	3.5	3.5	3.5	3.5	3.5	3.5	3.5	3.5	3.5	3.5	3.5	3.5	3.5	3.5	3.5	3.5	3.5	3.5	2.44007	2.44007	3.5	3.5	2.44007	3.5	3.5	3.5	3.5	2.44007	3.5	3.5	3.5	2.44007	3.5	3.5	3.5	3.5	3.5	3.5	2.44007	2.02698	3.5	3.5
3.5	3.5	3.5	3.5	3.5	3.5	3.5	3.5	3.5	3.5	3.5	3.5	3.5	3.5	3.5	3.5	3.5	3.5	3.5	3.5	3.5	3.5	3.5	3.5	3.5	3.5	3.5	2.44007	3.5	3.5	3.5	3.5	3.5	3.5	3.5	3.5	2.02698	3.5	3.5	2.44007	2.02698	3.5	2.44007	2.44007	2.44007	3.5	2.02698	2.44007	2.44007	3.5
3.5	3.5	3.5	3.5	3.5	3.5	3.5	3.5	3.5	3.5	3.5	3.5	3.5	3.5	3.5	3.5	3.5	3.5	3.5	3.5	3.5	3.5	3.5	3.5	2.02698	2.44007	3.5	3.5	2.44007	2.44007	3.5	3.5	3.5	3.5	2.44007	2.44007	2.44007	3.5	3.5	2.44007	2.02698	3.5	3.5	2.44007	2.02698	2.44007	2.44007	2.44007	2.44007	2.44007
3.5	3.5	3.5	3.5	3.5	3.5	3.5	3.5	3.5	3.5	3.5	3.5	3.5	3.5	3.5	3.5	3.5	3.5	3.5	3.5	3.5	3.5	3.5	3.5	2.44007	3.5	2.44007	3.5	3.5	3.5	2.44007	2.44007	3.5	2.44007	3.5	2.02698	3.5	3.5	3.5	2.44007	2.44007	3.5	3.5	2.44007	3.5	2.02698	2.44007	2.44007	2.02698	3.5
3.5	3.5	3.5	3.5	3.5	3.5	3.5	3.5	3.5	3.5	3.5	3.5	3.5	3.5	3.5	3.5	3.5	3.5	3.5	3.5	2.44007	3.5	3.5	3.5	3.5	2.44007	3.5	2.44007	3.5	2.44007	3.5	3.5	2.44007	2.02698	3.5	1.78534	2.44007	2.44007	1.78534	2.44007	1.78534	2.02698	1.78534	1.78534	2.44007	2.44007	2.44007	2.02698	2.02698	1.6139
3.5	3.5	3.5	3.5	3.5	3.5	3.5	3.5	3.5	3.5	3.5	3.5	3.5	3.5	3.5	3.5	3.5	3.5	3.5	3.5	3.5	3.5	3.5	3.5	3.5	3.5	2.44007	1.78534	2.02698	3.5	2.44007	2.02698	2.44007	1.78534	2.02698	1.28039	1.6139	1.6139	2.44007	2.02698	1.78534	3.5	2.44007	1.48091	1.6139	1.6139	1.78534	2.02698	3.5	1.78534
3.5	3.5	3.5	3.5	3.5	3.5	3.5	3.5	3.5	3.5	3.5	3.5	3.5	3.5	3.5	3.5	3.5	3.5	3.5	2.44007	3.5	3.5	3.5	3.5	3.5	3.5	2.02698	1.6139	2.44007	1.6139	2.02698	3.5	2.02698	3.5	2.02698	2.02698	2.02698	1.6139	2.44007	2.02698	1.28039	1.37225	2.02698	2.02698	1.28039	1.78534	2.44007	1.20081	1.48091	1.48091
3.5	3.5	3.5	3.5	3.5	3.5	3.5	3.5	3.5	3.5	3.5	3.5	3.5	3.5	3.5	3.5	2.44007	3.5	3.5	3.5	3.5	3.5	3.5	3.5	3.5	2.02698	2.44007	2.44007	2.02698	3.5	3.5	3.5	1.48091	1.78534	2.02698	2.44007	2.44007	1.6139	1.48091	1.48091	1.78534	1.01102	1.6139	1.78534	2.44007	1.28039	1.48091	2.02698	1.78534	2.02698
3.5	3.5	3.5	3.5	3.5	3.5	3.5	3.5	3.5	3.5	3.5	3.5	3.5	3.5	3.5	3.5	3.5	2.44007	3.5	3.5	3.5	2.44007	3.5	1.78534	2.44007	3.5	2.02698	1.78534	2.44007	2.02698	1.78534	2.44007	2.44007	1.78534	1.37225	1.48091	1.78534	1.37225	2.02698	1.28039	1.28039	1.28039	1.48091	1.20081	1.28039	1.48091	1.13061	1.28039	1.6139	1.37225
3.5	3.5	3.5	3.5	3.5	3.5	3.5	3.5	3.5	3.5	3.5	3.5	3.5	3.5	3.5	3.5	3.5	3.5	3.5	3.5	3.5	3.5	3.5	1.78534	3.5	2.44007	3.5	1.78534	1.48091	2.44007	2.02698	1.20081	2.02698	1.78534	1.37225	2.02698	1.28039	1.6139	1.20081	1.20081	1.01102	1.20081	1.28039	1.28039	1.20081	1.28039	1.6139	0.959164	1.13061	1.20081
3.5	3.5	3.5	3.5	3.5	3.5	3.5	3.5	3.5	3.5	3.5	3.5	3.5	3.5	3.5	3.5	3.5	2.44007	3.5	2.44007	3.5	3.5	3.5	3.5	2.02698	1.6139	3.5	1.37225	2.02698	1.6139	2.44007	1.28039	1.78534	1.28039	1.78534	1.48091	1.28039	1.48091	0.826179	0.911461	1.13061	1.01102	1.13061	0.911461	1.13061	1.28039	1.13061	1.28039	1.20081	1.13061
3.5	3.5	3.5	3.5	3.5	3.5	3.5	3.5	3.5	3.5	3.5	3.5	3.5	3.5	3.5	3.5	3.5	3.5	3.5	3.5	3.5	3.5	2.02698	2.44007	2.02698	2.44007	1.78534	2.44007	2.44007	1.37225	1.37225	1.28039	1.48091	1.28039	1.13061	1.20081	0.959164	0.911461	0.787716	1.37225	1.20081	1.13061	1.13061	0.867296	1.06782	1.37225	0.959164	0.911461	1.28039	1.01102
3.5	3.5	3.5	3.5	3.5	3.5	3.5	3.5	3.5	3.5	3.5	3.5	3.5	3.5	3.5	3.5	2.44007	3.5	3.5	3.5	3.5	3.5	2.44007	2.44007	2.44007	1.78534	2.44007	2.44007	1.37225	1.28039	1.28039	1.13061	1.48091	0.911461	1.28039	1.20081	0.959164	1.13061	1.13061	1.13061	0.826179	0.826179	0.911461	0.867296	0.911461	1.01102	0.826179	1.01102	1.28039	1.37225
3.5	3.5	3.5	3.5	3.5	3.5	3.5	3.5	3.5	3.5	3.5	3.5	3.5	3.5	3.5	3.5	3.5	3.5	3.5	3.5	3.5	1.78534	2.44007	2.44007	2.02698	2.44007	1.78534	1.78534	2.44007	1.28039	1.48091	1.37225	1.28039	1.28039	0.826179	1.20081	1.01102	0.867296	0.911461	0.826179	0.911461	0.826179	0.787716	0.625654	0.959164	0.751586	0.959164	1.13061	0.826179	1.01102
3.5	3.5	3.5	3.5	3.5	3.5	3.5	3.5	3.5	3.5	3.5	3.5	3.5	3.5	3.5	3.5	3.5	3.5	3.5	3.5	3.5	2.44007	2.02698	2.44007	1.78534	1.48091	1.78534	1.48091	1.6139	1.48091	1.28039	1.13061	1.01102	1.13061	0.826179	0.787716	1.13061	0.654731	0.625654	0.59793	0.826179	0.787716	0.6853	0.654731	0.625654	0.959164	0.654731	1.13061	0.867296	0.751586
3.5	3.5	3.5	3.5	3.5	3.5	3.5	3.5	3.5	3.5	3.5	3.5	3.5	3.5	3.5	3.5	3.5	3.5	2.44007	3.5	2.44007	2.44007	2.44007	1.37225	1.78534	1.48091	1.78534	1.28039	1.6139	1.01102	0.959164	1.37225	0.959164	0.751586	0.826179	0.911461	1.37225	0.959164	0.717522	0.521746	0.826179	0.59793	0.413089	0.59793	0.498372	0.867296	0.59793	0.6853	0.751586	0.826179
3.5	3.5	3.5	3.5	3.5	3.5	3.5	3.5	3.5	3.5	3.5	2.44007	3.5	3.5	3.5	3.5	3.5	3.5	3.5	2.44007	2.44007	3.5	3.5	2.44007	2.02698	1.37225	2.02698	1.01102	1.48091	1.37225	0.867296	1.01102	0.826179	0.911461	0.413089	0.959164	0.751586	0.546074	0.393548	0.59793	0.571438	0.393548	0.654731	0.356288	0.717522	0.787716	0.787716	0.356288	0.625654	0.654731
3.5	3.5	3.5	3.5	3.5	3.5	3.5	3.5	3.5	2.02698	3.5	3.5	3.5	3.5	3.5	3.5	3.5	3.5	3.5	2.44007	1.78534	2.02698	1.6139	1.6139	1.37225	1.20081	1.48091	1.28039	1.01102	0.787716	1.06782	1.06782	0.826179	0.751586	0.787716	0.47588	0.625654	0.521746	0.717522	0.521746	0.272211	0.288104	0.454207	0.47588	0.498372	0.393548	0.6853	0.59793	0.717522	0.787716
3.5	3.5	3.5	3.5	3.5	3.5	3.5	3.5	3.5	3.5	3.5	3.5	3.5	3.5	3.5	3.5	3.5	3.5	2.02698	2.44007	1.78534	1.48091	1.37225	2.44007	1.48091	1.48091	1.13061	1.6139	1.20081	0.959164	0.959164	0.751586	0.751586	0.787716	0.571438	0.498372	0.393548	0.717522	0.6853	0.521746	0.321221	0.356288	0.374627	0.521746	0.374627	0.433293	0.413089	0.393548	0.498372	0.521746
3.5	3.5	3.5	3.5	3.5	3.5	3.5	2.44007	3.5	3.5	3.5	3.5	3.5	3.5	2.44007	3.5	3.5	3.5	3.5	2.44007	3.5	2.44007	2.44007	1.37225	2.44007	1.28039	1.37225	1.20081	0.959164	1.37225	1.20081	1.06782	0.654731	0.625654	0.546074	0.546074	0.498372	0.433293	0.413089	0.374627	0.304433	0.288104	0.321221	0.393548	0.374627	0.454207	0.338497	0.498372	0.6853	0.393548
3.5	3.5	3.5	3.5	3.5	3.5	3.5	2.44007	3.5	3.5	3.5	3.5	2.44007	3.5	3.5	3.5	3.5	3.5	3.5	3.5	3.5	1.6139	2.02698	1.48091	1.6139	1.13061	1.37225	1.06782	0.959164	0.867296	0.571438	1.06782	0.654731	0.654731	0.433293	0.59793	0.47588	0.356288	0.226926	0.393548	0.413089	0.108657	0.546074	0.413089	0.226926	0.433293	0.433293	0.433293	0.321221	0.521746
3.5	3.5	3.5	3.5	3.5	3.5	3.5	3.5	3.5	3.5	3.5	3.5	3.5	2.44007	3.5	2.44007	3.5	3.5	2.44007	2.02698	1.6139	2.02698	2.02698	1.6139	1.37225	1.28039	1.48091	1.37225	1.37225	0.826179	0.787716	0.959164	0.59793	0.454207	0.59793	0.47588	0.304433	0.158349	0.393548	0.212565	0.132985	0.454207	0.338497	0.356288	0.393548	0.198541	0.393548	0.226926	0.198541	0.521746
3.5	3.5	3.5	3.5	2.44007	3.5	3.5	3.5	3.5	3.5	3.5	3.5	3.5	3.5	3.5	2.44007	3.5	3.5	3.5	2.44007	1.78534	2.02698	2.02698	1.37225	1.28039	0.959164	1.13061	1.06782	1.06782	1.06782	0.454207	0.654731	0.654731	0.498372	0.321221	0.654731	0.717522	0.241642	0.272211	0.198541	0.0852827	0.272211	0.226926	0.145532	0.241642	0.374627	0.226926	0.198541	0.304433	0.59793
3.5	3.5	3.5	3.5	3.5	3.5	3.5	3.5	2.44007	3.5	3.5	3.5	3.5	3.5	3.5	2.44007	2.44007	3.5	3.5	3.5	3.5	2.44007	1.78534	1.37225	2.02698	1.78534	1.06782	0.959164	1.13061	0.787716	0.911461	0.654731	0.393548	0.272211	0.413089	0.356288	0.454207	0.184841	0.413089	0.241642	0.158349	0.25673	0.145532	0.212565	0.198541	0.212565	0.272211	0.272211	0.498372	0.59793
3.5	3.5	3.5	3.5	3.5	3.5	3.5	3.5	3.5	3.5	3.5	3.5	3.5	3.5	2.44007	3.5	3.5	2.02698	2.44007	3.5	1.78534	2.44007	1.37225	1.37225	1.28039	1.48091	1.28039	1.28039	1.28039	0.787716	0.717522	0.59793	0.546074	0.338497	0.393548	0.356288	0.356288	0.226926	0.25673	0.521746	0.198541	0.0968551	0.020204	0.184841	0.171448	0.226926	0.454207	0.288104	0.374627	0.59793
3.5	3.5	3.5	3.5	3.5	3.5	3.5	3.5	3.5	3.5	3.5	3.5	3.5	3.5	3.5	3.5	3.5	2.44007	2.02698	3.5	2.02698	2.02698	1.48091	1.78534	1.28039	0.911461	1.13061	1.37225	0.521746	0.867296	0.6853	0.911461	0.356288	0.751586	0.25673	0.241642	0.241642	0.25673	0.212565	0.171448	0.0305689	0.0627909	0.0627909	0.0852827	0.25673	0.288104	0.393548	0.356288	0.321221	0.226926
3.5	3.5	3.5	3.5	3.5	3.5	3.5	3.5	2.02698	3.5	3.5	3.5	3.5	3.5	3.5	3.5	2.44007	2.44007	2.44007	3.5	2.44007	1.6139	1.78534	2.02698	1.6139	1.37225	1.13061	0.959164	0.826179	0.654731	1.06782	0.625654	0.625654	0.521746	0.47588	0.304433	0.0852827	0.226926	0.184841	0.0739307	0.132985	0.0852827	0.304433	0.0968551	0.198541	0.272211	0.338497	0.47588	0.521746	0.47588
3.5	3.5	3.5	3.5	3.5	3.5	3.5	3.5	3.5	3.5	3.5	3.5	3.5	3.5	3.5	3.5	3.5	3.5	3.5	2.44007	3.5	1.6139	1.78534	2.02698	1.48091	1.01102	1.37225	1.20081	0.867296	0.911461	0.787716	0.654731	0.571438	0.546074	0.338497	0.25673	0.25673	0.158349	0.132985	0.304433	0.158349	0.0739307	0.0739307	0.0411171	0.132985	0.198541	0.304433	0.393548	0.374627	0.241642
3.5	3.5	3.5	3.5	3.5	3.5	3.5	3.5	3.5	3.5	3.5	3.5	3.5	2.44007	3.5	3.5	3.5	3.5	3.5	3.5	2.44007	1.6139	1.48091	2.02698	1.28039	1.13061	0.911461	1.01102	1.28039	0.867296	0.751586	0.751586	0.498372	0.521746	0.321221	0.498372	0.272211	0.226926	0.338497	0.0852827	0.020204	0.184841	0	0.0305689	0.158349	0.171448	0.226926	0.132985	0.393548	0.571438
3.5	3.5	3.5	3.5	3.5	3.5	3.5	3.5	3.5	3.5	3.5	2.44007	3.5	3.5	3.5	3.5	2.44007	2.02698	2.02698	2.02698	2.44007	2.02698	1.6139	2.44007	1.20081	1.78534	1.06782	1.01102	1.01102	0.59793	0.717522	0.59793	0.393548	0.374627	0.304433	0.25673	0.120697	0.25673	0.145532	0.0739307	0.120697	0.184841	0.0852827	0.158349	0.212565	0.198541	0.184841	0.338497	0.304433	0.717522
3.5	3.5	3.5	3.5	3.5	3.5	3.5	3.5	3.5	2.44007	3.5	3.5	2.44007	3.5	3.5	3.5	3.5	2.44007	2.44007	2.44007	3.5	2.02698	2.02698	1.6139	1.37225	1.48091	1.28039	0.959164	1.01102	1.28039	0.787716	0.911461	0.433293	0.272211	0.374627	0.212565	0.226926	0.374627	0.0739307	0.184841	0.184841	0.0739307	0.0627909	0.120697	0.132985	0.108657	0.571438	0.226926	0.393548	0.47588
3.5	3.5	3.5	3.5	3.5	3.5	3.5	3.5	3.5	2.44007	3.5	2.44007	3.5	2.44007	2.44007	2.44007	3.5	3.5	3.5	2.44007	2.44007	2.02698	1.78534	1.37225	1.37225	1.48091	1.37225	1.01102	0.911461	0.959164	0.717522	0.717522	0.717522	0.498372	0.356288	0.393548	0.288104	0.198541	0.212565	0.0852827	0.132985	0.0852827	0.145532	0.184841	0.171448	0.132985	0.171448	0.25673	0.393548	0.288104
3.5	3.5	3.5	3.5	3.5	3.5	3.5	3.5	3.5	3.5	3.5	3.5	3.5	3.5	3.5	3.5	2.44007	3.5	3.5	1.78534	2.44007	2.44007	2.44007	1.28039	1.48091	1.48091	1.06782	1.28039	0.959164	0.911461	0.911461	0.867296	0.6853	0.304433	0.625654	0.321221	0.321221	0.272211	0.241642	0.0627909	0.145532	0.184841	0.226926	0.171448	0.304433	0.25673	0.338497	0.374627	0.356288	0.654731
3.5	3.5	3.5	3.5	3.5	3.5	3.5	2.44007	3.5	3.5	3.5	3.5	3.5	2.44007	3.5	3.5	2.44007	2.44007	3.5	2.44007	2.02698	1.48091	1.6139	2.02698	1.48091	1.48091	1.37225	0.867296	0.867296	0.959164	1.01102	0.6853	0.717522	0.546074	0.498372	0.272211	0.288104	0.338497	0.356288	0.321221	0.184841	0.288104	0.0518555	0.212565	0.212565	0.272211	0.0968551	0.374627	0.433293	0.571438
3.5	3.5	3.5	3.5	3.5	3.5	3.5	3.5	3.5	3.5	3.5	3.5	2.44007	3.5	2.44007	2.44007	3.5	3.5	3.5	2.44007	1.37225	2.02698	2.02698	1.6139	1.20081	1.37225	2.02698	1.13061	1.13061	1.01102	0.751586	0.751586	0.6853	0.546074	0.654731	0.413089	0.304433	0.356288	0.171448	0.0627909	0.171448	0.020204	0.158349	0.304433	0.108657	0.321221	0.433293	0.241642	0.25673	0.498372
3.5	3.5	3.5	3.5	3.5	3.5	3.5	3.5	2.44007	3.5	3.5	3.5	3.5	3.5	3.5	2.44007	3.5	2.44007	2.44007	3.5	2.02698	2.44007	2.02698	1.6139	1.6139	1.20081	1.48091	1.01102	1.20081	0.6853	0.717522	0.59793	0.959164	0.911461	0.454207	0.571438	0.498372	0.198541	0.321221	0.288104	0.321221	0.212565	0.433293	0.433293	0.241642	0.374627	0.498372	0.393548	0.59793	0.867296
3.5	3.5	3.5	3.5	3.5	3.5	3.5	3.5	3.5	2.02698	3.5	3.5	3.5	2.44007	3.5	3.5	3.5	3.5	3.5	2.44007	1.48091	1.78534	1.78534	1.48091	1.37225	1.48091	1.06782	1.28039	1.20081	1.01102	0.6853	0.6853	0.59793	0.521746	0.571438	0.867296	0.413089	0.212565	0.321221	0.25673	0.374627	0.25673	0.212565	0.288104	0.356288	0.374627	0.454207	0.546074	0.625654	0.521746
3.5	3.5	3.5	3.5	3.5	3.5	2.44007	3.5	3.5	3.5	3.5	3.5	3.5	3.5	2.02698	2.44007	2.44007	3.5	2.44007	2.44007	2.44007	2.44007	1.78534	1.48091	1.78534	1.37225	1.37225	1.48091	1.20081	1.13061	0.59793	0.787716	0.787716	0.787716	0.654731	0.374627	0.321221	0.226926	0.454207	0.288104	0.272211	0.304433	0.226926	0.374627	0.571438	0.338497	0.338497	0.625654	0.571438	0.654731
3.5	3.5	3.5	3.5	3.5	2.44007	3.5	2.44007	3.5	3.5	3.5	3.5	3.5	3.5	3.5	3.5	2.44007	3.5	3.5	3.5	2.02698	2.44007	2.02698	2.02698	1.48091	1.78534	1.78534	1.6139	1.48091	1.01102	1.20081	0.826179	0.867296	0.826179	0.625654	0.454207	0.413089	0.751586	0.338497	0.338497	0.226926	0.433293	0.321221	0.25673	0.546074	0.454207	0.546074	0.717522	0.654731	0.751586
3.5	3.5	3.5	3.5	3.5	3.5	3.5	3.5	2.44007	3.5	3.5	2.44007	3.5	3.5	3.5	3.5	2.44007	2.44007	3.5	2.44007	1.78534	1.78534	2.02698	2.02698	2.02698	1.28039	1.37225	1.20081	1.28039	1.37225	0.911461	0.911461	0.787716	0.59793	0.59793	0.826179	0.47588	0.288104	0.393548	0.521746	0.393548	0.321221	0.338497	0.59793	0.47588	0.521746	0.374627	0.59793	0.867296	0.625654
3.5	3.5	3.5	3.5	3.5	3.5	3.5	3.5	3.5	3.5	3.5	3.5	3.5	3.5	3.5	3.5	3.5	3.5	3.5	2.44007	2.44007	2.02698	2.44007	3.5	1.78534	1.78534	1.13061	1.28039	1.37225	1.13061	1.06782	0.717522	0.959164	0.717522	0.826179	0.625654	0.546074	0.413089	0.393548	0.288104	0.521746	0.521746	0.454207	0.356288	0.454207	0.498372	0.498372	0.571438	0.625654	0.6853
3.5	3.5	3.5	3.5	2.44007	3.5	3.5	3.5	3.5	2.44007	3.5	3.5	3.5	3.5	3.5	2.44007	3.5	3.5	3.5	3.5	1.78534	3.5	2.02698	1.6139	2.44007	1.20081	1.37225	1.6139	1.6139	1.37225	1.78534	0.959164	0.867296	1.06782	0.911461	0.374627	0.546074	0.546074	0.654731	0.212565	0.393548	0.413089	0.498372	0.413089	0.47588	0.498372	0.59793	0.654731	0.6853	1.20081
3.5	3.5	2.44007	3.5	3.5	3.5	3.5	3.5	2.44007	3.5	3.5	2.44007	3.5	3.5	3.5	3.5	3.5	3.5	2.02698	3.5	2.44007	1.78534	2.02698	2.44007	2.44007	1.78534	2.02698	1.48091	1.28039	1.48091	1.28039	1.20081	1.28039	0.867296	0.6853	0.433293	0.47588	0.521746	0.751586	0.433293	0.521746	0.454207	0.498372	0.338497	0.654731	0.787716	0.6853	0.521746	0.751586	0.59793
3.5	3.5	3.5	3.5	3.5	3.5	3.5	2.44007	3.5	3.5	3.5	3.5	3.5	3.5	3.5	3.5	3.5	2.44007	2.44007	2.44007	3.5	2.02698	3.5	2.44007	1.78534	2.02698	1.78534	1.37225	1.48091	1.48091	1.6139	1.20081	1.01102	1.06782	1.01102	0.6853	0.787716	0.59793	0.521746	0.654731	0.625654	0.59793	0.454207	0.6853	0.654731	0.787716	0.751586	0.59793	0.521746	1.13061
3.5	3.5	3.5	3.5	3.5	3.5	2.44007	3.5	3.5	3.5	3.5	2.44007	2.44007	3.5	3.5	3.5	3.5	3.5	2.44007	3.5	3.5	3.5	2.44007	2.02698	1.6139	1.78534	1.78534	1.78534	2.02698	1.6139	1.6139	1.01102	1.37225	1.37225	0.867296	0.867296	0.6853	0.911461	0.6853	0.787716	0.59793	0.654731	0.6853	0.625654	0.47588	1.13061	0.717522	1.01102	1.01102	1.48091
3.5	3.5	3.5	3.5	3.5	3.5	2.44007	3.5	3.5	3.5	2.44007	3.5	2.44007	3.5	3.5	3.5	3.5	3.5	2.44007	3.5	2.44007	2.44007	2.44007	3.5	2.02698	2.44007	1.37225	1.37225	1.6139	1.6139	1.37225	1.28039	1.13061	1.13061	1.37225	1.13061	0.826179	0.717522	0.751586	0.571438	0.59793	0.751586	0.393548	0.498372	0.625654	0.654731	0.911461	0.911461	0.867296	1.06782
3.5	3.5	3.5	3.5	3.5	3.5	3.5	2.44007	3.5	3.5	3.5	3.5	3.5	3.5	3.5	3.5	3.5	3.5	2.44007	3.5	3.5	2.02698	3.5	2.44007	1.78534	2.44007	3.5	2.02698	2.02698	1.37225	2.02698	1.78534	1.6139	1.20081	1.01102	1.01102	1.01102	0.826179	0.717522	0.654731	0.787716	0.717522	0.356288	0.571438	0.654731	0.6853	0.751586	0.717522	0.911461	1.37225
3.5	3.5	3.5	3.5	3.5	3.5	3.5	3.5	3.5	3.5	3.5	2.44007	3.5	3.5	3.5	3.5	3.5	3.5	3.5	3.5	3.5	3.5	2.44007	3.5	3.5	1.78534	2.02698	1.6139	1.48091	1.78534	1.78534	1.37225	1.20081	1.20081	0.751586	0.826179	0.717522	0.787716	0.959164	1.01102	0.826179	0.571438	0.6853	0.625654	0.59793	0.826179	1.01102	0.911461	1.37225	1.20081
3.5	3.5	3.5	3.5	3.5	3.5	3.5	3.5	3.5	3.5	3.5	3.5	3.5	3.5	3.5	3.5	2.44007	3.5	3.5	2.44007	3.5	3.5	3.5	2.44007	2.44007	2.44007	2.02698	2.02698	1.6139	1.78534	1.28039	1.6139	1.37225	1.37225	1.20081	1.06782	1.20081	0.717522	1.13061	0.959164	0.625654	0.959164	0.867296	0.911461	0.6853	0.826179	0.867296	1.06782	1.20081	1.13061
3.5	3.5	3.5	3.5	3.5	3.5	3.5	3.5	3.5	3.5	3.5	3.5	3.5	3.5	3.5	3.5	2.44007	2.44007	3.5	2.44007	1.78534	3.5	3.5	2.02698	1.78534	2.02698	3.5	3.5	1.6139	2.44007	1.6139	1.6139	1.6139	1.6139	1.37225	0.826179	1.20081	0.751586	1.13061	0.826179	0.826179	0.654731	0.911461	0.959164	0.654731	0.826179	0.911461	1.01102	1.37225	1.78534
3.5	3.5	3.5	3.5	3.5	3.5	3.5	3.5	3.5	3.5	3.5	3.5	2.44007	3.5	3.5	3.5	2.44007	3.5	3.5	3.5	2.44007	3.5	3.5	2.44007	1.48091	1.48091	1.78534	3.5	2.02698	2.44007	1.20081	1.6139	1.13061	1.48091	1.28039	1.78534	0.867296	0.867296	1.20081	1.28039	0.867296	0.826179	0.867296	0.959164	1.20081	1.13061	1.48091	1.20081	1.28039	1.78534
3.5	3.5	3.5	3.5	3.5	3.5	2.44007	3.5	3.5	3.5	3.5	3.5	3.5	2.44007	3.5	3.5	3.5	3.5	3.5	3.5	3.5	2.02698	2.44007	2.44007	2.44007	2.44007	2.44007	2.44007	2.02698	1.6139	2.44007	1.48091	2.02698	2.44007	1.13061	1.20081	0.911461	1.13061	1.13061	0.959164	1.06782	0.959164	0.959164	1.13061	0.959164	1.13061	1.20081	1.28039	1.20081	1.78534
3.5	3.5	3.5	3.5	3.5	3.5	3.5	3.5	3.5	3.5	3.5	3.5	3.5	3.5	3.5	3.5	3.5	3.5	3.5	2.44007	2.44007	3.5	2.44007	3.5	3.5	1.78534	3.5	2.02698	2.44007	1.78534	3.5	1.28039	1.78534	1.37225	1.37225	1.48091	1.13061	1.06782	1.20081	1.37225	0.959164	1.06782	0.959164	1.20081	0.911461	1.28039	1.06782	0.911461	1.13061	1.6139
3.5	3.5	3.5	3.5	3.5	3.5	3.5	3.5	3.5	3.5	3.5	3.5	3.5	3.5	3.5	3.5	3.5	3.5	2.44007	3.5	3.5	2.44007	2.44007	1.37225	2.44007	2.44007	2.44007	3.5	3.5	1.78534	2.44007	1.6139	3.5	1.20081	1.48091	1.20081	1.06782	1.20081	1.28039	1.13061	1.06782	1.20081	1.13061	1.01102	1.06782	1.48091	1.48091	1.37225	2.02698	2.02698
3.5	3.5	3.5	3.5	3.5	3.5	3.5	3.5	3.5	3.5	3.5	3.5	3.5	3.5	3.5	3.5	3.5	3.5	3.5	2.44007	2.44007	3.5	3.5	3.5	3.5	3.5	1.78534	3.5	2.44007	2.02698	3.5	3.5	1.78534	1.48091	1.6139	1.78534	1.6139	1.20081	1.28039	1.6139	1.06782	1.06782	1.01102	1.01102	1.13061	1.6139	1.6139	1.48091	1.28039	1.6139
3.5	3.5	3.5	3.5	3.5	3.5	3.5	3.5	3.5	2.44007	3.5	3.5	3.5	3.5	3.5	3.5	3.5	3.5	2.44007	3.5	3.5	3.5	2.44007	2.44007	3.5	2.44007	3.5	2.44007	2.44007	2.44007	3.5	1.78534	1.6139	2.02698	2.02698	1.48091	1.48091	1.37225	1.37225	1.37225	1.28039	1.78534	0.867296	1.37225	1.48091	1.78534	1.6139	1.37225	1.48091	1.6139
3.5	3.5	3.5	3.5	3.5	3.5	3.5	3.5	3.5	3.5	3.5	3.5	3.5	3.5	3.5	3.5	3.5	3.5	3.5	3.5	3.5	3.5	3.5	3.5	2.44007	2.44007	2.44007	2.44007	3.5	2.44007	3.5	1.78534	2.02698	1.78534	1.6139	1.78534	1.06782	1.20081	1.6139	1.28039	1.6139	1.78534	1.6139	2.02698	1.28039	1.48091	1.48091	3.5	1.78534	1.48091
3.5	3.5	3.5	3.5	3.5	3.5	2.44007	3.5	3.5	3.5	3.5	3.5	3.5	3.5	3.5	3.5	3.5	3.5	3.5	3.5	3.5	3.5	3.5	2.44007	2.44007	2.02698	3.5	3.5	2.44007	3.5	3.5	3.5	2.02698	2.02698	2.44007	2.02698	2.44007	1.37225	3.5	1.78534	1.37225	1.48091	1.37225	1.48091	1.48091	2.02698	1.6139	3.5	1.6139	2.44007
3.5	3.5	3.5	3.5	3.5	3.5	3.5	3.5	3.5	3.5	3.5	3.5	2.44007	3.5	3.5	3.5	3.5	3.5	2.44007	3.5	2.44007	3.5	2.44007	2.44007	2.44007	3.5	3.5	3.5	2.02698	3.5	2.44007	2.02698	1.78534	2.44007	1.37225	1.48091	1.78534	1.78534	1.6139	2.02698	1.6139	1.78534	1.28039	2.44007	1.48091	2.02698	1.48091	2.02698	1.6139	3.5
3.5	3.5	3.5	3.5	3.5	3.5	3.5	3.5	3.5	3.5	3.5	3.5	3.5	3.5	3.5	3.5	3.5	3.5	3.5	3.5	2.44007	3.5	3.5	3.5	3.5	3.5	3.5	3.5	3.5	3.5	2.44007	2.44007	3.5	2.44007	3.5	2.44007	1.48091	2.44007	1.6139	1.01102	1.6139	1.6139	1.28039	1.78534	2.02698	1.48091	1.78534	2.44007	2.44007	2.44007
3.5	3.5	3.5	3.5	3.5	3.5	3.5	3.5	3.5	3.5	3.5	3.5	3.5	3.5	3.5	3.5	3.5	3.5	3.5	3.5	3.5	3.5	3.5	3.5	3.5	3.5	3.5	3.5	3.5	3.5	3.5	2.44007	3.5	1.78534	2.02698	2.02698	1.6139	2.44007	1.48091	1.48091	1.37225	1.78534	2.02698	1.78534	1.20081	1.78534	2.02698	2.44007	2.02698	2.44007
3.5	3.5	3.5	3.5	3.5	3.5	3.5	3.5	3.5	3.5	3.5	3.5	3.5	3.5	3.5	3.5	3.5	3.5	3.5	3.5	3.5	3.5	3.5	3.5	3.5	3.5	3.5	3.5	3.5	3.5	2.02698	3.5	3.5	3.5	2.02698	1.78534	2.02698	1.78534	3.5	2.02698	1.6139	1.6139	3.5	1.48091	1.78534	2.02698	2.02698	3.5	2.44007	2.02698
3.5	3.5	3.5	3.5	3.5	3.5	3.5	3.5	3.5	3.5	3.5	3.5	3.5	3.5	3.5	3.5	3.5	3.5	3.5	3.5	3.5	3.5	3.5	3.5	3.5	3.5	2.44007	3.5	3.5	2.44007	3.5	2.44007	2.02698	2.02698	2.44007	2.02698	1.78534	2.44007	2.02698	2.44007	2.44007	2.44007	2.02698	2.02698	1.78534	2.44007	2.44007	1.78534	1.78534	3.5
3.5	3.5	3.5	3.5	3.5	3.5	3.5	3.5	3.5	3.5	3.5	3.5	3.5	3.5	3.5	3.5	2.44007	3.5	3.5	3.5	3.5	2.44007	3.5	3.5	2.44007	3.5	3.5	3.5	3.5	3.5	3.5	2.44007	2.44007	2.44007	2.02698	2.44007	2.44007	2.44007	2.02698	1.78534	2.02698	1.48091	2.02698	3.5	1.78534	3.5	2.44007	2.02698	2.44007	3.5
3.5	3.5	3.5	3.5	3.5	3.5	3.5	3.5	3.5	3.5	3.5	3.5	3.5	3.5	3.5	3.5	3.5	3.5	3.5	2.44007	3.5	3.5	3.5	3.5	3.5	3.5	3.5	3.5	3.5	2.44007	3.5	3.5	2.44007	3.5	2.02698	2.44007	2.44007	3.5	3.5	1.48091	2.44007	2.44007	3.5	2.02698	2.44007	2.44007	1.78534	2.02698	2.44007	2.44007
3.5	3.5	3.5	3.5	3.5	3.5	3.5	3.5	3.5	3.5	3.5	3.5	3.5	3.5	3.5	3.5	3.5	3.5	3.5	3.5	3.5	3.5	2.44007	3.5	3.5	3.5	3.5	2.44007	3.5	3.5	3.5	3.5	2.02698	3.5	3.5	3.5	3.5	2.02698	2.44007	1.6139	1.78534	1.78534	2.44007	3.5	1.6139	2.44007	2.02698	2.44007	2.44007	2.44007
3.5	3.5	3.5	3.5	3.5	3.5	3.5	3.5	3.5	3.5	3.5	3.5	3.5	3.5	3.5	3.5	3.5	3.5	3.5	3.5	3.5	3.5	3.5	3.5	3.5	3.5	3.5	3.5	3.5	3.5	3.5	2.44007	2.44007	3.5	2.02698	2.44007	2.02698	3.5	2.02698	3.5	2.44007	2.44007	3.5	2.02698	2.44007	3.5	3.5	2.44007	3.5	2.44007
3.5	3.5	3.5	3.5	3.5	3.5	3.5	3.5	3.5	3.5	3.5	3.5	3.5	3.5	3.5	3.5	3.5	3.5	3.5	3.5	3.5	3.5	3.5	3.5	3.5	2.44007	3.5	2.44007	3.5	3.5	3.5	2.44007	3.5	3.5	2.44007	3.5	2.44007	3.5	2.44007	2.02698	2.44007	2.44007	2.02698	3.5	3.5	3.5	2.44007	3.5	3.5	3.5
3.5	3.5	3.5	3.5	3.5	3.5	3.5	3.5	3.5	2.44007	3.5	3.5	3.5	3.5	3.5	3.5	3.5	3.5	3.5	3.5	3.5	3.5	3.5	3.5	2.44007	3.5	3.5	3.5	3.5	3.5	2.44007	3.5	2.44007	3.5	3.5	2.44007	3.5	3.5	2.44007	3.5	3.5	3.5	1.48091	1.78534	3.5	2.44007	3.5	2.44007	3.5	3.5
3.5	3.5	3.5	3.5	3.5	3.5	3.5	3.5	2.44007	3.5	3.5	3.5	3.5	3.5	3.5	3.5	3.5	3.5	3.5	3.5	3.5	2.44007	3.5	3.5	3.5	3.5	3.5	2.44007	3.5	3.5	3.5	3.5	3.5	3.5	3.5	3.5	3.5	3.5	2.02698	2.44007	2.44007	3.5	2.44007	3.5	3.5	3.5	3.5	3.5	3.5	2.44007
3.5	3.5	3.5	3.5	3.5	3.5	3.5	3.5	3.5	3.5	3.5	3.5	3.5	3.5	3.5	3.5	3.5	3.5	3.5	3.5	3.5	3.5	3.5	3.5	3.5	3.5	3.5	2.44007	3.5	3.5	3.5	3.5	3.5	3.5	3.5	3.5	2.44007	3.5	2.44007	2.02698	2.02698	2.44007	3.5	2.44007	3.5	3.5	2.44007	3.5	3.5	3.5
3.5	3.5	3.5	3.5	3.5	3.5	3.5	3.5	3.5	3.5	3.5	3.5	3.5	3.5	3.5	3.5	3.5	3.5	3.5	3.5	3.5	3.5	3.5	3.5	3.5	2.44007	3.5	3.5	3.5	3.5	3.5	3.5	3.5	3.5	3.5	3.5	3.5	3.5	2.44007	3.5	2.44007	3.5	3.5	3.5	3.5	3.5	2.02698	2.44007	3.5	3.5
3.5	3.5	3.5	3.5	3.5	3.5	3.5	3.5	3.5	3.5	3.5	3.5	3.5	3.5	3.5	3.5	3.5	3.5	3.5	3.5	3.5	3.5	3.5	3.5	3.5	3.5	3.5	3.5	3.5	3.5	3.5	3.5	3.5	3.5	3.5	2.44007	3.5	3.5	3.5	3.5	3.5	3.5	3.5	2.44007	3.5	3.5	2.44007	3.5	3.5	3.5
3.5	3.5	3.5	3.5	3.5	3.5	3.5	3.5	3.5	3.5	3.5	3.5	3.5	3.5	3.5	3.5	3.5	3.5	3.5	3.5	3.5	3.5	3.5	3.5	3.5	3.5	3.5	3.5	3.5	3.5	3.5	3.5	3.5	3.5	3.5	3.5	3.5	3.5	2.44007	3.5	3.5	3.5	3.5	3.5	3.5	3.5	3.5	2.02698	2.44007	3.5
3.5	3.5	3.5	3.5	3.5	3.5	3.5	3.5	3.5	3.5	3.5	3.5	3.5	3.5	3.5	3.5	3.5	3.5	3.5	3.5	3.5	3.5	3.5	3.5	3.5	3.5	3.5	3.5	3.5	3.5	3.5	3.5	2.44007	3.5	3.5	3.5	3.5	2.44007	2.02698	2.44007	3.5	3.5	2.44007	3.5	2.44007	3.5	2.44007	3.5	3.5	3.5
3.5	3.5	3.5	3.5	3.5	3.5	3.5	3.5	3.5	3.5	3.5	3.5	3.5	3.5	3.5	3.5	3.5	3.5	3.5	3.5	3.5	3.5	3.5	3.5	3.5	3.5	3.5	3.5	3.5	3.5	3.5	3.5	3.5	3.5	3.5	3.5	3.5	3.5	3.5	3.5	3.5	3.5	3.5	2.02698	3.5	3.5	3.5	2.44007	2.44007	3.5
3.5	3.5	3.5	3.5	3.5	3.5	3.5	3.5	3.5	3.5	3.5	3.5	3.5	3.5	3.5	3.5	3.5	3.5	3.5	3.5	3.5	3.5	3.5	3.5	3.5	3.5	3.5	3.5	3.5	3.5	3.5	3.5	3.5	2.44007	2.44007	3.5	3.5	3.5	3.5	3.5	3.5	2.44007	3.5	3.5	3.5	2.44007	3.5	2.44007	3.5	3.5
3.5	3.5	3.5	3.5	3.5	3.5	3.5	3.5	3.5	3.5	3.5	3.5	3.5	3.5	3.5	3.5	3.5	3.5	3.5	3.5	3.5	3.5	3.5	3.5	3.5	3.5	3.5	3.5	3.5	3.5	3.5	3.5	3.5	3.5	3.5	3.5	3.5	3.5	3.5	2.44007	3.5	3.5	2.44007	3.5	3.5	3.5	3.5	3.5	3.5	3.5
3.5	3.5	3.5	3.5	3.5	3.5	3.5	3.5	3.5	3.5	3.5	3.5	3.5	3.5	3.5	3.5	3.5	3.5	3.5	3.5	3.5	3.5	3.5	3.5	3.5	3.5	3.5	3.5	3.5	3.5	3.5	3.5	3.5	3.5	3.5	3.5	3.5	3.5	3.5	3.5	3.5	3.5	3.5	2.44007	3.5	3.5	3.5	3.5	3.5	3.5
3.5	3.5	3.5	3.5	3.5	3.5	3.5	3.5	3.5	3.5	3.5	3.5	3.5	3.5	3.5	3.5	3.5	3.5	3.5	3.5	3.5	3.5	3.5	3.5	3.5	3.5	3.5	3.5	3.5	3.5	3.5	3.5	3.5	3.5	3.5	3.5	3.5	3.5	3.5	3.5	3.5	3.5	3.5	3.5	3.5	3.5	3.5	3.5	3.5	3.5
3.5	3.5	3.5	3.5	3.5	3.5	3.5	3.5	3.5	3.5	3.5	3.5	3.5	3.5	3.5	3.5	3.5	3.5	3.5	3.5	3.5	3.5	3.5	3.5	3.5	3.5	3.5	3.5	3.5	3.5	3.5	3.5	3.5	3.5	3.5	3.5	3.5	3.5	3.5	3.5	3.5	3.5	3.5	3.5	3.5	3.5	3.5	3.5	3.5	3.5
3.5	3.5	3.5	3.5	3.5	3.5	3.5	3.5	3.5	3.5	3.5	3.5	3.5	3.5	3.5	3.5	3.5	3.5	3.5	3.5	3.5	3.5	3.5	3.5	3.5	3.5	3.5	3.5	3.5	3.5	3.5	3.5	3.5	3.5	3.5	3.5	3.5	3.5	3.5	3.5	3.5	3.5	3.5	3.5	3.5	3.5	3.5	3.5	3.5	3.5
3.5	3.5	3.5	3.5	3.5	3.5	3.5	3.5	3.5	3.5	3.5	3.5	3.5	3.5	3.5	3.5	3.5	3.5	3.5	3.5	3.5	3.5	3.5	3.5	3.5	3.5	3.5	3.5	3.5	3.5	3.5	3.5	3.5	3.5	3.5	3.5	3.5	3.5	3.5	3.5	3.5	3.5	3.5	3.5	3.5	3.5	3.5	3.5	3.5	3.5
3.5	3.5	3.5	3.5	3.5	3.5	3.5	3.5	3.5	3.5	3.5	3.5	3.5	3.5	3.5	3.5	3.5	3.5	3.5	3.5	3.5	3.5	3.5	3.5	3.5	3.5	3.5	3.5	3.5	3.5	3.5	3.5	3.5	3.5	3.5	3.5	3.5	3.5	3.5	3.5	3.5	3.5	3.5	3.5	3.5	3.5	3.5	3.5	3.5	3.5
3.5	3.5	3.5	3.5	3.5	3.5	3.5	3.5	3.5	3.5	3.5	3.5	3.5	3.5	3.5	3.5	3.5	3.5	3.5	3.5	3.5	3.5	3.5	3.5	3.5	3.5	3.5	3.5	3.5	3.5	3.5	2.44007	3.5	3.5	3.5	3.5	3.5	3.5	3.5	3.5	3.5	3.5	2.44007	3.5	3.5	3.5	3.5	3.5	3.5	3.5
3.5	3.5	3.5	3.5	3.5	3.5	3.5	3.5	3.5	3.5	3.5	3.5	3.5	3.5	3.5	3.5	3.5	3.5	3.5	3.5	3.5	3.5	3.5	3.5	3.5	3.5	3.5	3.5	3.5	3.5	3.5	3.5	3.5	3.5	3.5	3.5	3.5	3.5	3.5	3.5	3.5	3.5	3.5	3.5	3.5	3.5	3.5	3.5	3.5	3.5
3.5	3.5	3.5	3.5	3.5	3.5	3.5	3.5	3.5	3.5	3.5	3.5	3.5	3.5	3.5	3.5	3.5	3.5	3.5	3.5	3.5	3.5	3.5	3.5	3.5	3.5	3.5	3.5	3.5	3.5	3.5	3.5	3.5	3.5	3.5	3.5	3.5	3.5	3.5	3.5	3.5	3.5	3.5	3.5	3.5	3.5	3.5	3.5	3.5	3.5
3.5	3.5	3.5	3.5	3.5	3.5	3.5	3.5	3.5	3.5	3.5	3.5	3.5	3.5	3.5	3.5	3.5	3.5	3.5	3.5	3.5	3.5	3.5	3.5	3.5	3.5	3.5	3.5	3.5	3.5	3.5	3.5	3.5	3.5	3.5	3.5	3.5	3.5	3.5	3.5	3.5	3.5	3.5	3.5	3.5	3.5	3.5	3.5	3.5	3.5
3.5	3.5	3.5	3.5	3.5	3.5	3.5	3.5	3.5	3.5	3.5	3.5	3.5	3.5	3.5	3.5	3.5	3.5	3.5	3.5	3.5	3.5	3.5	3.5	3.5	3.5	3.5	3.5	3.5	3.5	3.5	3.5	3.5	3.5	3.5	3.5	3.5	3.5	3.5	3.5	3.5	3.5	3.5	3.5	3.5	3.5	3.5	3.5	3.5	3.5
3.5	3.5	3.5	3.5	3.5	3.5	3.5	3.5	3.5	3.5	3.5	3.5	3.5	3.5	3.5	2.44007	3.5	3.5	3.5	3.5	3.5	3.5	3.5	3.5	3.5	3.5	3.5	3.5	3.5	3.5	3.5	3.5	3.5	3.5	3.5	3.5	3.5	3.5	3.5	3.5	3.5	3.5	3.5	3.5	3.5	3.5	3.5	3.5	3.5	3.5
3.5	3.5	3.5	3.5	3.5	3.5	3.5	3.5	3.5	3.5	3.5	3.5	3.5	3.5	3.5	3.5	3.5	3.5	3.5	3.5	3.5	3.5	3.5	3.5	3.5	3.5	3.5	3.5	3.5	3.5	3.5	3.5	3.5	3.5	3.5	3.5	3.5	3.5	3.5	3.5	3.5	3.5	3.5	3.5	3.5	3.5	3.5	3.5	3.5	3.5
3.5	3.5	3.5	3.5	3.5	3.5	3.5	3.5	3.5	3.5	3.5	3.5	3.5	3.5	3.5	3.5	3.5	3.5	3.5	3.5	3.5	3.5	3.5	3.5	3.5	3.5	3.5	3.5	3.5	3.5	3.5	3.5	3.5	3.5	3.5	3.5	3.5	2.44007	3.5	3.5	3.5	3.5	3.5	3.5	3.5	3.5	3.5	3.5	3.5	3.5
3.5	3.5	3.5	3.5	3.5	3.5	3.5	3.5	3.5	3.5	3.5	3.5	3.5	3.5	3.5	3.5	3.5	3.5	3.5	3.5	3.5	3.5	3.5	3.5	3.5	3.5	3.5	3.5	3.5	3.5	3.5	3.5	3.5	3.5	3.5	3.5	3.5	3.5	3.5	3.5	3.5	3.5	3.5	3.5	3.5	3.5	3.5	3.5	3.5	3.5
3.5	3.5	3.5	3.5	3.5	3.5	3.5	3.5	3.5	3.5	3.5	3.5	3.5	3.5	3.5	3.5	3.5	3.5	3.5	3.5	3.5	3.5	3.5	3.5	3.5	3.5	3.5	3.5	3.5	3.5	3.5	3.5	3.5	3.5	3.5	3.5	3.5	3.5	3.5	3.5	3.5	3.5	3.5	3.5	3.5	3.5	3.5	3.5	3.5	3.5
[truncated: 51 more columns]

## Sheet: Fig5F
4	4	4	4	4	4	4	4	4	4	4	4	4	4	4	4	4	4	4	4	4	4	4	4	4	4	4	4	4	4	4	4	4	4	2.69481	4	4	4	4	4	4	4	4	4	4	4	4	4	4	4
4	4	4	4	4	4	4	4	4	4	4	4	4	4	4	4	4	4	4	4	4	4	4	4	4	4	4	4	4	4	4	4	4	4	4	4	4	4	4	4	4	4	4	4	4	4	4	4	4	4
4	4	4	4	4	4	4	4	4	4	4	4	4	4	4	4	4	4	4	4	4	4	4	4	4	4	4	4	4	4	4	4	4	4	4	4	4	4	4	4	4	4	4	4	4	4	4	4	4	4
4	4	4	4	4	4	4	4	4	4	4	4	4	4	4	4	4	4	4	4	4	4	4	4	4	4	4	4	4	4	4	4	4	4	4	4	4	4	4	4	4	4	4	4	4	4	4	4	2.69481	4
4	4	4	4	4	4	4	4	4	4	4	4	4	4	4	4	4	4	4	4	4	4	4	4	4	4	4	4	4	4	4	4	4	4	4	4	4	4	4	4	4	4	4	4	4	4	4	2.69481	4	4
4	4	4	4	4	4	4	4	4	4	4	4	4	4	4	4	4	4	4	4	4	4	4	4	4	4	4	4	4	4	4	4	4	2.69481	4	4	4	4	4	4	4	4	4	4	4	4	4	4	4	4
4	4	4	4	4	4	4	4	4	4	4	4	4	4	4	4	4	4	4	4	4	4	4	4	4	4	4	4	2.69481	4	4	4	4	4	4	4	2.69481	4	4	4	4	4	4	4	4	4	4	4	4	4
4	4	4	4	4	4	4	4	4	4	4	4	4	4	4	4	4	4	4	4	4	4	4	4	4	4	4	2.28172	4	4	4	4	4	4	4	4	4	4	4	4	4	4	4	4	4	4	4	4	4	4
4	4	4	4	4	4	4	4	4	4	4	4	4	4	4	4	4	4	4	4	4	4	4	4	4	4	4	4	4	4	4	2.69481	4	4	4	4	2.69481	4	4	4	4	4	4	4	4	4	4	4	4	4
4	4	4	4	4	4	4	4	4	4	4	4	4	4	4	4	4	4	4	4	4	4	4	4	4	2.69481	4	4	4	4	4	4	4	4	4	4	4	4	4	4	4	4	2.69481	2.28172	4	4	4	4	2.69481	4
4	4	4	4	4	4	4	4	4	4	4	4	4	2.69481	4	4	4	4	4	4	4	4	4	4	4	4	4	4	4	4	4	4	4	4	4	4	4	2.69481	4	4	4	4	4	2.69481	4	4	4	2.69481	4	4
4	4	4	4	4	4	4	4	4	4	4	4	4	4	4	4	4	4	4	4	4	4	4	4	4	4	4	4	2.69481	2.69481	4	2.69481	2.69481	2.69481	4	4	4	4	4	4	4	4	4	2.28172	4	2.69481	4	4	2.04008	4
4	4	4	4	4	4	4	4	4	4	4	4	4	4	4	4	4	4	4	4	4	4	4	4	4	4	4	4	4	4	2.69481	4	4	2.69481	4	4	4	4	4	4	4	2.69481	2.69481	2.69481	4	4	2.69481	2.04008	2.69481	2.69481
4	4	4	4	4	4	4	4	4	2.69481	4	4	4	4	4	4	4	4	4	4	4	4	4	4	4	4	4	4	4	4	2.69481	4	2.69481	2.69481	2.69481	4	4	4	2.69481	4	4	2.69481	4	4	4	2.69481	2.69481	2.28172	2.28172	2.04008
4	4	4	4	4	4	4	4	4	4	4	4	2.69481	4	4	4	4	4	4	4	2.28172	4	4	4	4	2.69481	4	4	4	4	4	4	4	4	4	4	4	4	4	2.04008	2.69481	4	4	4	4	2.04008	4	2.69481	2.28172	2.28172
4	4	4	4	4	4	4	4	4	2.69481	4	4	4	4	4	4	4	4	4	4	4	4	4	4	4	4	4	2.69481	4	2.69481	4	4	4	2.28172	2.69481	4	2.28172	4	4	2.69481	4	2.28172	2.69481	2.04008	2.28172	1.86864	4	2.69481	2.04008	2.69481
4	4	4	4	4	4	4	4	4	4	4	4	4	4	2.69481	2.69481	4	4	4	4	2.69481	4	4	4	4	4	2.69481	2.69481	4	2.69481	2.69481	4	4	4	2.28172	4	4	2.04008	4	2.04008	4	2.69481	2.28172	2.69481	2.69481	2.69481	2.69481	2.69481	2.69481	2.04008
4	4	4	4	4	4	4	4	4	4	4	4	2.28172	4	4	4	2.69481	2.69481	4	2.28172	4	4	2.69481	2.69481	4	4	4	4	4	4	4	2.69481	4	2.69481	4	2.28172	2.69481	2.69481	2.69481	4	2.69481	2.69481	4	2.69481	4	1.86864	2.28172	2.04008	1.86864	1.73565
4	4	4	4	4	4	4	4	4	4	4	4	2.69481	4	2.69481	2.69481	4	4	2.69481	2.69481	2.69481	4	2.69481	4	4	2.69481	4	2.69481	2.69481	2.04008	2.69481	2.69481	2.28172	4	2.69481	4	2.69481	4	4	2.04008	2.28172	2.28172	2.04008	1.86864	1.86864	4	2.04008	2.04008	2.04008	2.04008
4	4	4	4	4	2.69481	4	4	4	4	4	4	4	4	4	2.69481	2.69481	2.28172	4	4	2.69481	2.69481	2.69481	2.69481	2.69481	2.69481	4	4	4	2.69481	2.69481	4	4	2.69481	2.69481	2.28172	2.69481	2.28172	2.04008	2.69481	1.73565	2.04008	1.86864	1.73565	2.04008	2.04008	2.28172	1.62699	2.04008	2.28172
4	4	4	4	4	4	4	4	4	4	4	4	4	4	4	4	4	2.28172	4	4	4	4	4	4	2.69481	4	4	4	2.28172	4	2.69481	2.28172	2.28172	2.28172	2.69481	2.04008	2.28172	2.69481	2.69481	1.73565	1.86864	1.86864	1.62699	1.53513	2.04008	2.69481	1.73565	1.32256	1.62699	1.45555
4	4	4	4	4	4	4	4	4	4	4	2.69481	4	4	4	4	4	2.69481	4	4	4	4	2.69481	2.28172	2.69481	2.69481	2.69481	4	2.69481	2.69481	2.69481	2.28172	2.69481	4	2.04008	2.04008	1.86864	2.28172	2.28172	1.53513	2.28172	2.04008	1.73565	1.32256	1.26576	1.38535	1.62699	1.45555	1.45555	1.38535
4	4	4	4	4	4	4	4	4	4	2.69481	4	4	2.69481	4	2.69481	4	2.69481	4	2.69481	2.69481	4	1.86864	2.69481	2.69481	4	2.69481	4	2.28172	4	2.69481	2.69481	1.86864	2.28172	2.28172	2.69481	2.04008	1.86864	2.28172	1.86864	4	2.04008	1.45555	1.62699	1.38535	1.86864	1.38535	1.32256	1.45555	1.73565
4	4	4	4	4	4	4	4	2.69481	4	4	4	4	4	4	2.69481	4	4	2.69481	2.04008	2.69481	2.28172	4	4	2.69481	2.28172	4	2.28172	2.28172	1.73565	2.69481	1.86864	2.28172	1.73565	1.73565	2.69481	2.28172	1.45555	1.73565	2.04008	1.86864	2.28172	2.04008	1.73565	1.73565	1.08092	1.2139	1.73565	1.53513	1.2139
4	4	4	4	4	4	4	4	4	4	4	2.69481	4	4	2.28172	4	2.69481	4	2.28172	2.28172	4	2.28172	2.69481	1.86864	4	2.28172	4	1.86864	1.73565	2.04008	2.04008	1.86864	4	1.86864	1.73565	2.04008	1.86864	1.53513	1.86864	2.28172	2.04008	2.28172	1.45555	1.38535	1.53513	1.62699	1.2139	1.53513	1.26576	1.38535
4	4	4	4	4	4	4	4	2.69481	2.28172	4	2.69481	4	4	2.69481	4	2.28172	2.69481	4	4	2.69481	2.28172	2.28172	2.69481	2.69481	2.04008	2.28172	2.04008	2.69481	1.86864	4	1.62699	2.69481	1.86864	1.86864	2.69481	1.86864	2.04008	2.04008	2.04008	1.38535	1.45555	1.26576	1.38535	1.38535	1.38535	1.26576	1.53513	1.2139	1.38535
4	4	4	4	4	4	4	2.69481	4	2.69481	4	4	4	4	2.69481	2.69481	2.69481	2.69481	2.69481	2.69481	4	2.69481	2.28172	2.69481	2.69481	2.28172	2.04008	2.04008	2.28172	1.86864	2.28172	1.62699	2.04008	1.86864	2.04008	1.73565	1.62699	1.45555	1.53513	1.38535	1.38535	1.73565	1.45555	1.26576	1.08092	1.32256	1.1662	0.800815	0.972262	1.04246
4	4	4	4	4	4	4	4	4	4	4	2.69481	4	2.28172	2.69481	4	4	4	2.69481	2.04008	2.04008	2.69481	2.28172	2.69481	2.28172	1.86864	2.04008	2.28172	1.73565	1.62699	2.04008	2.04008	2.04008	2.28172	1.62699	1.73565	1.73565	1.2139	1.38535	1.45555	1.12204	1.08092	0.94004	1.38535	1.1662	1.53513	1.08092	1.1662	0.909472	1.1662
4	4	4	4	4	2.69481	4	4	4	4	4	2.69481	2.28172	4	2.69481	2.28172	2.69481	2.04008	2.28172	1.73565	2.28172	1.53513	2.69481	1.86864	2.28172	2.28172	2.04008	1.45555	2.04008	1.62699	1.86864	2.28172	2.04008	1.38535	1.86864	1.73565	1.53513	1.2139	1.08092	1.2139	1.26576	1.26576	1.2139	0.880395	1.04246	0.94004	1.08092	0.880395	1.26576	0.688034
4	4	4	4	4	4	2.69481	4	4	4	4	4	2.69481	2.28172	4	2.69481	4	2.28172	1.86864	2.69481	2.28172	2.28172	2.04008	2.04008	1.73565	2.04008	1.62699	2.04008	1.62699	2.04008	1.73565	1.86864	1.38535	1.73565	1.53513	1.45555	1.32256	1.1662	1.38535	1.38535	1.26576	1.26576	1.08092	1.04246	1.00633	0.85267	0.800815	0.826179	0.909472	1.04246
4	4	4	4	4	4	4	2.69481	2.69481	4	2.28172	2.69481	4	2.69481	2.69481	2.69481	2.28172	2.28172	2.28172	1.86864	1.86864	2.28172	2.28172	2.04008	2.04008	2.04008	1.62699	2.28172	2.04008	1.62699	1.26576	1.53513	2.04008	1.38535	1.26576	1.53513	1.62699	1.2139	1.53513	1.04246	1.32256	0.776487	1.2139	1.08092	0.972262	0.85267	1.08092	0.909472	1.04246	0.66783
4	4	4	2.69481	4	4	4	4	4	2.69481	4	2.28172	4	2.28172	2.69481	1.73565	2.69481	2.69481	2.28172	2.04008	2.04008	1.86864	2.04008	2.69481	2.69481	4	2.28172	2.28172	1.86864	1.86864	2.28172	1.45555	1.26576	1.32256	1.45555	1.26576	1.38535	1.04246	1.26576	1.53513	0.94004	0.94004	1.2139	0.94004	0.730621	1.08092	0.800815	0.66783	0.611029	0.688034
4	4	4	4	2.69481	4	4	4	4	2.69481	4	4	2.69481	4	4	1.86864	2.28172	2.69481	2.28172	2.28172	2.69481	2.28172	2.28172	1.86864	2.04008	1.86864	1.53513	1.73565	2.28172	1.53513	1.86864	1.86864	1.32256	1.53513	1.62699	1.38535	1.2139	1.26576	1.32256	1.08092	0.94004	0.972262	1.04246	1.2139	0.66783	0.826179	0.708947	0.559173	0.730621	0.66783
4	4	4	4	4	2.69481	4	2.69481	2.69481	4	2.28172	4	2.69481	2.69481	2.28172	2.28172	2.04008	2.04008	2.69481	1.86864	2.28172	1.86864	1.73565	1.73565	2.69481	1.73565	1.73565	2.04008	1.86864	1.73565	1.45555	1.53513	1.1662	1.38535	1.26576	1.32256	1.08092	1.32256	1.32256	1.38535	0.880395	0.94004	0.880395	1.00633	0.800815	0.909472	0.776487	0.880395	0.593237	0.730621
4	4	4	4	4	4	4	2.69481	2.69481	4	2.69481	2.28172	4	4	2.28172	2.04008	2.69481	2.28172	1.73565	2.28172	1.62699	2.04008	2.69481	2.04008	1.73565	2.04008	1.62699	1.73565	1.38535	1.62699	1.86864	1.2139	1.62699	1.53513	1.26576	1.32256	0.909472	1.08092	1.04246	0.94004	1.1662	1.1662	0.972262	0.730621	0.688034	1.00633	0.542844	0.611029	0.66783	0.467305
4	4	4	4	4	4	2.28172	4	4	2.28172	4	2.69481	2.04008	2.69481	2.69481	2.69481	2.28172	2.04008	2.28172	1.62699	2.69481	1.73565	1.45555	1.45555	1.38535	1.86864	2.28172	1.26576	1.53513	2.28172	1.53513	1.45555	1.53513	1.2139	1.26576	1.00633	0.85267	0.800815	0.972262	1.04246	0.688034	0.880395	0.688034	0.753112	0.648288	0.66783	0.730621	0.593237	0.542844	0.328671
4	4	4	4	4	4	2.28172	2.28172	2.69481	2.28172	4	2.28172	2.69481	2.69481	2.04008	2.69481	2.04008	2.04008	2.04008	2.04008	2.04008	2.04008	1.73565	1.86864	2.04008	1.45555	1.38535	2.04008	1.38535	1.45555	1.32256	1.2139	1.2139	0.972262	1.2139	1.2139	1.1662	0.826179	0.826179	0.800815	0.826179	0.753112	0.688034	0.688034	0.593237	0.526951	0.439581	0.496382	0.453282	0.400273
4	4	4	4	4	2.69481	4	4	2.28172	2.28172	2.69481	1.86864	2.69481	2.28172	2.04008	2.69481	2.69481	1.73565	2.69481	2.28172	1.1662	2.04008	1.38535	1.32256	1.62699	1.53513	1.53513	1.53513	1.45555	1.73565	1.12204	1.45555	1.38535	1.53513	0.972262	0.85267	1.04246	0.909472	0.611029	0.826179	0.648288	0.730621	0.688034	0.629367	0.800815	0.387725	0.575962	0.496382	0.400273	0.542844
4	4	4	4	4	4	4	2.28172	2.69481	4	4	2.28172	1.86864	2.28172	2.04008	1.86864	2.28172	1.73565	1.86864	1.73565	2.28172	1.86864	1.62699	1.26576	1.62699	1.1662	1.53513	1.53513	1.32256	1.32256	1.08092	1.2139	1.08092	1.2139	1.08092	1.04246	0.800815	0.972262	0.730621	0.708947	0.688034	0.559173	0.66783	0.66783	0.575962	0.648288	0.351596	0.400273	0.351596	0.511471
4	4	4	2.69481	4	4	2.69481	4	4	2.28172	4	2.69481	2.04008	2.28172	1.86864	2.28172	2.04008	1.73565	1.86864	1.86864	1.53513	1.62699	1.53513	1.62699	1.62699	1.12204	1.45555	1.32256	1.32256	1.2139	1.08092	1.45555	1.45555	1.1662	1.12204	1.08092	0.85267	0.826179	0.972262	0.826179	0.708947	0.575962	0.629367	0.526951	0.413089	0.340023	0.363397	0.363397	0.467305	0.285309
4	4	2.69481	4	4	4	2.69481	4	4	2.69481	2.69481	2.28172	2.28172	2.69481	1.86864	2.69481	1.86864	1.53513	1.53513	1.53513	1.73565	1.38535	2.04008	1.62699	1.38535	1.38535	1.32256	1.38535	1.26576	1.53513	1.2139	1.12204	0.85267	1.12204	1.1662	0.94004	0.880395	0.753112	1.00633	0.753112	0.648288	0.559173	0.526951	0.629367	0.413089	0.413089	0.317531	0.340023	0.400273	0.340023
4	4	4	4	2.28172	4	4	2.28172	2.28172	4	2.69481	2.28172	2.69481	2.69481	1.86864	1.73565	1.73565	1.62699	1.62699	1.73565	1.38535	1.53513	1.32256	1.38535	1.26576	1.32256	1.45555	1.38535	1.04246	1.62699	1.2139	1.1662	1.08092	1.00633	1.12204	0.66783	1.04246	0.826179	0.776487	0.66783	0.629367	0.575962	0.467305	0.375437	0.629367	0.235199	0.351596	0.317531	0.295858	0.162872
4	4	4	4	4	4	2.28172	4	4	2.69481	1.73565	2.28172	2.69481	1.73565	2.28172	2.69481	2.28172	2.04008	2.28172	2.04008	1.86864	1.2139	1.45555	1.73565	1.62699	1.53513	1.08092	1.45555	1.32256	1.45555	1.2139	1.2139	1.12204	0.826179	0.972262	0.972262	0.85267	0.800815	0.708947	0.629367	0.611029	0.467305	0.526951	0.453282	0.24489	0.306596	0.387725	0.0401924	0.285309	0.363397
4	4	4	4	2.69481	4	4	2.28172	4	2.28172	2.28172	2.28172	2.69481	2.28172	1.62699	1.73565	2.28172	1.38535	1.38535	1.86864	1.73565	1.26576	2.04008	1.53513	1.53513	1.45555	1.1662	1.62699	1.32256	1.45555	1.45555	1.32256	1.04246	0.688034	0.880395	0.800815	0.629367	0.648288	0.629367	0.708947	0.559173	0.66783	0.413089	0.387725	0.328671	0.216278	0.162872	0.216278	0.137863	0.25474
4	4	4	4	4	2.69481	4	2.69481	2.69481	1.86864	2.28172	2.28172	2.04008	2.69481	4	2.28172	1.53513	1.86864	1.73565	1.73565	2.28172	1.1662	1.26576	1.45555	1.2139	1.26576	1.32256	1.2139	1.45555	1.53513	1.04246	1.04246	0.972262	1.12204	1.08092	0.688034	1.08092	0.730621	0.648288	0.526951	0.439581	0.611029	0.481666	0.467305	0.453282	0.328671	0.295858	0.207038	0.274944	0.162872
4	4	4	4	4	4	4	2.28172	2.28172	1.86864	4	2.04008	2.28172	2.69481	1.86864	1.73565	2.04008	1.86864	1.86864	1.38535	1.73565	1.45555	1.73565	1.62699	1.38535	1.62699	1.38535	1.26576	1.26576	1.1662	1.2139	0.972262	0.972262	1.04246	1.12204	0.880395	0.66783	0.648288	0.648288	0.467305	0.593237	0.351596	0.629367	0.375437	0.317531	0.481666	0.225663	0.197939	0.264757	0.0907893
4	4	4	4	4	2.69481	1.86864	4	2.28172	1.53513	1.62699	2.28172	1.73565	1.73565	2.04008	1.62699	1.62699	1.86864	1.62699	1.73565	1.45555	1.38535	1.38535	1.45555	1.32256	1.32256	1.32256	1.26576	1.45555	1.62699	1.53513	1.53513	1.2139	1.00633	0.880395	0.909472	0.85267	0.688034	0.593237	0.511471	0.629367	0.708947	0.467305	0.413089	0.439581	0.317531	0.363397	0.0401924	0.25474	0.197939
4	4	4	4	4	4	4	2.69481	2.69481	2.69481	2.28172	1.86864	1.86864	1.73565	2.04008	1.53513	2.28172	1.86864	1.62699	1.62699	1.73565	1.45555	1.62699	1.38535	1.62699	1.62699	1.73565	1.26576	1.53513	1.2139	1.1662	1.32256	1.00633	0.94004	0.85267	0.880395	0.776487	0.575962	0.753112	0.611029	0.730621	0.453282	0.629367	0.328671	0.317531	0.162872	0.154419	0.285309	0.285309	0.154419
4	4	2.69481	4	4	4	2.28172	2.28172	2.04008	2.04008	1.73565	2.28172	1.86864	1.73565	1.86864	2.69481	1.45555	2.28172	1.86864	1.38535	1.32256	2.04008	1.62699	1.45555	1.73565	1.62699	1.38535	1.45555	1.38535	1.1662	1.32256	0.880395	0.826179	1.00633	0.826179	1.04246	0.94004	0.688034	0.611029	0.730621	0.753112	0.542844	0.648288	0.439581	0.24489	0.351596	0.375437	0.129755	0.24489	0.137863
4	4	4	2.69481	2.69481	2.69481	2.69481	4	2.28172	2.28172	2.28172	2.04008	1.86864	2.28172	2.28172	1.62699	1.45555	2.04008	1.62699	2.04008	1.53513	1.86864	1.32256	1.2139	1.53513	1.38535	1.38535	1.86864	1.32256	1.2139	1.38535	1.1662	1.62699	0.972262	1.00633	0.730621	0.94004	0.800815	0.593237	0.496382	0.467305	0.526951	0.453282	0.467305	0.387725	0.351596	0.387725	0.340023	0.306596	0.207038
4	4	4	4	2.69481	4	2.69481	2.28172	2.69481	1.86864	2.04008	2.69481	2.69481	1.86864	2.04008	2.04008	1.45555	2.04008	1.62699	1.73565	1.86864	1.62699	1.62699	1.53513	1.32256	1.45555	1.62699	1.32256	1.26576	1.62699	1.45555	0.972262	1.1662	0.909472	1.04246	0.880395	0.94004	0.688034	1.00633	0.776487	0.66783	0.629367	0.496382	0.66783	0.387725	0.363397	0.453282	0.274944	0.317531	0.387725
4	4	4	4	4	2.69481	4	2.28172	1.86864	2.28172	1.86864	2.69481	2.04008	2.28172	2.28172	4	2.04008	1.62699	2.04008	1.53513	1.73565	1.45555	1.62699	1.62699	1.38535	1.62699	1.32256	1.62699	1.32256	1.62699	1.1662	1.1662	1.26576	1.04246	1.2139	0.94004	0.909472	0.85267	0.972262	0.800815	0.542844	0.648288	0.730621	0.66783	0.453282	0.375437	0.481666	0.197939	0.363397	0.387725
4	4	4	4	4	4	2.28172	2.28172	2.28172	4	2.04008	4	1.86864	2.04008	2.04008	1.73565	2.28172	4	2.04008	4	1.62699	1.86864	1.53513	1.62699	1.38535	1.62699	2.04008	1.45555	1.45555	1.08092	1.26576	1.38535	1.45555	1.45555	0.972262	1.1662	0.94004	0.972262	0.611029	1.00633	0.776487	0.708947	0.511471	0.611029	0.439581	0.467305	0.351596	0.453282	0.340023	0.285309
4	4	4	4	4	4	2.69481	4	4	2.69481	2.04008	4	2.04008	2.28172	1.86864	2.28172	2.04008	1.73565	1.53513	1.86864	2.04008	1.26576	1.86864	1.86864	2.28172	1.62699	1.62699	1.62699	1.2139	1.45555	1.45555	1.12204	1.2139	1.45555	1.26576	1.04246	0.800815	0.730621	0.972262	0.776487	0.85267	0.542844	0.511471	0.611029	0.439581	0.481666	0.413089	0.264757	0.559173	0.264757
4	4	4	4	4	4	4	2.69481	2.04008	2.69481	2.69481	2.28172	2.69481	2.69481	4	4	2.04008	1.62699	1.86864	1.73565	1.53513	2.04008	1.53513	2.04008	1.32256	1.73565	1.53513	1.73565	1.73565	1.53513	1.62699	1.38535	1.38535	1.38535	1.2139	0.94004	1.12204	1.2139	1.26576	1.04246	0.688034	0.66783	0.753112	0.708947	0.496382	0.496382	0.559173	0.351596	0.526951	0.197939
4	4	4	4	4	4	4	4	2.04008	4	2.04008	4	2.28172	2.04008	4	2.69481	1.62699	2.28172	2.04008	1.86864	1.62699	2.04008	1.86864	1.62699	1.73565	2.04008	1.53513	1.62699	1.86864	1.45555	1.62699	1.1662	1.45555	1.26576	1.32256	1.12204	1.45555	1.12204	0.776487	1.08092	1.00633	0.880395	0.593237	0.800815	0.730621	0.629367	0.559173	0.688034	0.426188	0.467305
4	4	4	4	4	4	4	2.28172	4	4	1.86864	4	2.04008	2.69481	2.28172	2.69481	2.04008	2.04008	2.04008	2.04008	1.62699	2.04008	1.86864	1.62699	2.28172	2.04008	1.86864	1.12204	1.53513	1.53513	1.2139	1.26576	1.1662	1.32256	1.1662	1.45555	0.972262	1.32256	0.94004	1.08092	0.730621	0.800815	0.800815	1.04246	0.66783	0.776487	0.593237	0.526951	0.648288	0.542844
4	4	4	4	2.69481	2.69481	4	4	2.69481	4	2.04008	2.69481	2.28172	2.28172	2.28172	2.69481	2.04008	2.69481	1.62699	1.73565	2.69481	2.04008	1.62699	2.69481	2.04008	1.86864	1.86864	4	1.73565	2.04008	1.86864	2.28172	1.45555	1.73565	1.26576	1.26576	1.38535	1.2139	1.00633	1.04246	1.12204	0.776487	0.826179	0.800815	0.629367	0.776487	0.688034	0.730621	0.481666	0.575962
4	4	4	4	4	4	4	4	4	4	4	4	4	2.28172	2.69481	2.69481	4	2.04008	2.28172	2.69481	2.04008	1.86864	1.73565	2.28172	1.62699	1.73565	1.86864	1.62699	1.73565	1.62699	1.86864	1.62699	2.28172	1.53513	1.53513	1.26576	1.38535	1.38535	1.45555	1.00633	0.94004	1.1662	0.730621	0.85267	1.2139	1.00633	0.800815	0.753112	0.753112	0.648288
4	4	4	4	4	4	4	2.69481	2.69481	2.69481	4	4	4	2.28172	2.28172	2.04008	4	2.04008	2.28172	2.69481	2.28172	1.86864	2.04008	2.04008	1.45555	2.04008	2.28172	1.86864	2.28172	1.73565	2.28172	1.86864	1.62699	1.73565	1.73565	1.45555	1.45555	1.38535	1.32256	1.38535	0.880395	1.08092	1.2139	1.04246	1.04246	0.826179	0.776487	0.826179	0.730621	0.94004
4	4	4	4	4	4	4	4	4	4	2.28172	2.69481	4	4	4	2.28172	2.69481	2.28172	2.69481	4	2.28172	1.86864	4	2.04008	1.73565	2.69481	1.86864	2.04008	1.86864	1.86864	1.86864	2.04008	1.53513	1.86864	1.45555	1.73565	1.53513	2.04008	1.53513	1.26576	1.62699	1.1662	1.00633	1.2139	1.12204	0.94004	1.12204	0.85267	0.826179	0.909472
4	4	4	4	4	4	4	4	2.69481	4	4	4	4	4	2.28172	2.69481	2.69481	2.28172	4	2.04008	2.04008	2.69481	2.04008	2.04008	2.69481	2.04008	2.69481	2.69481	4	2.04008	1.53513	1.86864	2.04008	2.04008	1.73565	2.69481	1.53513	1.45555	2.04008	1.12204	1.26576	1.26576	1.2139	1.62699	0.972262	1.38535	1.12204	0.94004	0.94004	0.880395
4	4	4	4	4	4	4	2.69481	4	4	4	4	4	2.69481	4	2.28172	2.69481	2.04008	4	2.69481	1.73565	2.28172	2.28172	2.28172	2.28172	2.28172	2.69481	2.28172	2.28172	4	1.86864	1.73565	2.69481	2.04008	1.86864	1.86864	1.45555	1.62699	1.73565	1.86864	1.32256	1.73565	1.38535	1.2139	1.04246	0.826179	1.2139	1.00633	0.85267	1.1662
4	4	4	4	4	4	4	4	4	4	2.28172	4	4	2.69481	4	2.28172	4	4	2.69481	4	2.69481	2.69481	2.04008	2.69481	2.69481	2.69481	2.28172	2.28172	2.04008	4	2.69481	1.86864	2.28172	2.28172	2.28172	2.04008	1.53513	1.62699	1.86864	1.45555	1.62699	1.53513	0.909472	1.45555	1.08092	1.45555	1.45555	1.04246	1.38535	1.26576
4	4	4	4	4	4	4	2.69481	2.69481	4	4	4	4	4	4	2.69481	4	2.69481	2.28172	2.28172	2.28172	2.69481	4	2.04008	2.69481	2.04008	4	2.69481	2.69481	2.69481	4	2.69481	2.04008	2.69481	1.62699	1.86864	1.73565	2.04008	2.04008	1.73565	2.04008	1.86864	2.28172	1.08092	1.26576	1.45555	1.1662	1.08092	1.2139	0.972262
4	4	4	4	4	4	4	4	4	4	4	2.69481	4	4	4	4	4	2.69481	2.69481	2.28172	4	2.28172	2.69481	2.28172	2.28172	2.69481	2.28172	2.28172	4	4	4	2.69481	4	2.69481	1.86864	2.04008	1.86864	1.86864	2.28172	2.28172	2.04008	1.73565	1.45555	1.32256	1.38535	1.73565	1.62699	1.38535	1.53513	1.45555
4	4	4	4	4	4	4	2.69481	4	2.69481	2.69481	4	4	4	4	4	2.69481	2.69481	4	4	2.69481	2.28172	2.69481	4	2.69481	2.04008	4	2.28172	2.69481	2.69481	4	2.28172	2.04008	2.04008	2.28172	1.62699	2.28172	1.86864	2.04008	2.04008	1.32256	1.86864	1.45555	1.62699	1.32256	1.62699	1.2139	1.73565	1.62699	1.62699
4	4	4	4	4	4	4	4	2.69481	4	4	4	2.69481	4	4	4	4	2.69481	4	2.69481	4	2.28172	4	1.86864	2.28172	4	4	4	2.28172	4	2.69481	4	4	4	4	2.69481	1.86864	1.73565	2.28172	2.04008	1.86864	1.86864	2.28172	1.86864	1.86864	1.62699	1.53513	1.73565	2.04008	1.45555
4	4	4	2.69481	4	4	4	4	4	4	4	4	2.69481	4	4	2.69481	4	2.69481	4	4	2.69481	2.69481	2.69481	2.69481	4	2.28172	2.28172	4	4	2.69481	2.28172	2.28172	2.69481	2.69481	2.69481	2.28172	2.69481	2.28172	1.62699	2.69481	2.04008	2.28172	1.38535	1.86864	1.73565	1.86864	2.28172	2.04008	1.86864	1.86864
4	4	4	4	4	4	4	4	4	4	4	4	4	4	2.69481	4	4	2.04008	4	4	2.69481	4	2.69481	4	4	4	4	4	4	4	2.69481	2.28172	2.69481	2.69481	2.69481	2.69481	4	2.69481	2.69481	1.86864	2.04008	1.86864	1.86864	1.86864	1.62699	1.62699	1.73565	1.62699	2.69481	1.73565
4	4	4	4	4	4	4	4	4	4	4	4	4	4	4	2.69481	4	4	2.69481	4	2.69481	2.69481	4	2.69481	4	2.69481	4	2.69481	2.69481	4	2.69481	4	4	2.69481	2.69481	2.69481	2.69481	2.69481	2.69481	4	4	2.28172	2.28172	2.28172	2.28172	2.28172	2.69481	2.04008	4	1.73565
4	4	4	4	4	4	4	4	4	4	4	4	4	4	4	2.69481	4	4	2.69481	4	4	2.69481	2.69481	2.69481	4	2.69481	2.69481	2.28172	4	4	4	4	4	4	2.28172	2.28172	4	2.04008	4	2.28172	4	2.28172	2.69481	2.04008	2.28172	2.69481	1.73565	2.04008	2.28172	1.73565
4	4	4	4	4	4	4	4	4	4	4	4	4	4	4	4	4	2.69481	4	4	4	4	4	4	4	4	4	4	4	4	4	4	4	4	2.69481	2.69481	2.69481	4	4	1.86864	2.28172	4	2.04008	2.69481	2.28172	2.04008	2.04008	2.04008	2.28172	2.04008
4	4	4	4	4	4	4	4	4	4	4	4	4	4	4	4	4	4	2.69481	4	4	4	4	4	2.69481	4	4	2.69481	4	4	4	2.69481	4	2.69481	4	4	4	4	2.28172	4	2.69481	4	4	2.04008	2.04008	2.28172	2.04008	2.28172	2.28172	1.86864
4	4	4	4	4	4	4	4	4	4	4	4	4	4	4	4	4	2.69481	2.69481	2.69481	4	2.28172	2.69481	4	4	2.69481	4	2.69481	4	4	4	4	2.69481	4	4	4	4	4	2.69481	2.04008	4	2.69481	4	2.69481	2.69481	2.28172	4	4	2.28172	2.28172
4	4	4	4	4	4	4	4	4	4	4	4	4	2.69481	4	4	4	4	4	4	4	4	2.69481	2.69481	4	4	4	4	4	4	4	4	4	2.69481	4	2.69481	4	4	4	4	2.69481	2.69481	2.69481	2.69481	4	2.28172	2.69481	2.28172	2.28172	2.28172
4	4	4	4	4	4	4	4	4	4	4	4	4	4	4	4	4	4	4	4	2.69481	4	2.69481	4	4	2.69481	4	4	4	4	4	4	4	4	4	2.69481	4	4	4	4	4	4	2.69481	2.69481	4	4	2.28172	4	2.69481	2.69481
4	4	4	4	4	4	2.69481	4	4	4	4	4	4	4	2.69481	4	4	4	4	4	4	2.69481	4	4	4	4	4	4	4	4	4	4	4	4	4	2.69481	4	4	4	2.28172	4	2.69481	4	2.28172	4	2.69481	2.69481	2.69481	4	2.69481
4	4	4	4	4	4	4	4	4	4	4	4	4	4	4	4	4	4	4	4	4	4	4	4	2.69481	4	4	4	4	4	4	2.69481	4	4	4	4	4	4	2.69481	2.69481	2.69481	4	4	4	2.69481	2.69481	2.69481	2.69481	2.28172	2.69481
4	4	4	4	4	4	4	4	4	4	4	4	4	4	4	4	4	4	4	4	4	4	4	4	4	4	4	4	4	4	4	4	4	4	4	4	4	4	4	2.69481	4	2.69481	2.69481	4	4	2.69481	2.69481	4	4	4
4	4	4	4	4	4	4	4	4	4	4	4	4	4	4	4	4	4	4	4	4	4	4	4	4	4	4	4	4	4	4	4	4	4	4	4	4	4	4	2.69481	4	4	2.69481	4	4	4	2.28172	4	2.69481	4
4	4	4	4	4	4	4	4	4	4	4	4	4	4	4	4	4	4	4	4	4	4	4	4	4	4	4	4	4	4	4	4	4	4	4	4	4	4	4	2.69481	2.69481	4	4	4	4	4	2.69481	4	2.69481	4
4	4	4	4	4	4	4	4	4	4	4	4	4	4	4	4	4	4	4	4	4	4	4	4	4	4	4	4	4	4	4	4	4	4	4	4	4	4	2.69481	4	4	2.69481	4	2.28172	4	4	2.69481	4	4	4
4	4	4	4	4	4	4	4	4	4	4	4	4	4	4	4	4	4	4	4	4	4	4	4	4	4	4	4	2.69481	4	4	4	4	4	4	4	4	4	4	4	2.69481	4	4	4	2.69481	4	4	4	4	2.69481
4	4	4	4	4	4	4	4	4	4	4	4	4	4	4	4	4	4	4	4	4	4	4	4	4	4	4	4	4	4	4	4	4	4	4	4	4	4	4	4	4	4	4	4	4	2.69481	4	2.69481	2.69481	4
4	4	4	4	4	4	4	4	4	4	4	4	4	4	4	4	4	4	4	4	4	4	4	4	4	4	4	4	4	4	4	4	4	4	4	4	4	4	2.69481	4	4	4	4	4	4	4	4	4	4	4
4	4	4	4	4	4	4	4	4	4	4	4	4	4	4	4	4	4	4	4	4	4	4	4	4	4	4	4	4	4	4	4	4	4	4	4	4	4	4	2.69481	4	4	4	4	4	2.69481	4	2.69481	4	4
4	4	4	4	4	4	4	4	4	4	4	4	4	4	4	4	4	4	4	4	4	4	4	4	4	4	4	4	4	4	4	4	4	4	4	4	4	4	4	4	4	2.69481	4	4	4	4	4	4	4	4
4	4	4	4	4	4	4	4	4	4	4	4	4	4	4	4	4	4	4	4	4	4	4	4	4	4	4	4	4	4	4	4	4	4	4	4	4	4	4	4	4	4	4	4	4	2.69481	2.69481	4	4	2.69481
4	4	4	4	4	4	4	4	4	4	4	4	4	4	4	4	4	4	4	4	4	4	4	4	4	4	4	4	4	4	4	4	4	4	4	4	4	4	4	4	4	4	4	4	4	4	4	4	4	4
4	4	4	4	4	4	4	4	4	4	4	4	4	4	4	4	4	4	4	4	4	4	4	4	4	4	4	4	4	4	4	4	4	4	4	4	4	4	4	4	4	4	4	4	4	4	4	4	4	4
4	4	4	4	4	4	4	4	4	4	4	4	4	4	4	4	4	4	4	4	4	4	4	4	4	4	4	4	4	4	4	4	4	4	4	4	4	4	4	4	4	4	4	4	4	4	4	4	4	4
4	4	4	4	4	4	4	4	4	4	4	4	4	4	4	4	4	4	4	4	4	4	4	4	4	4	4	4	4	4	4	4	4	4	4	4	4	4	4	4	4	4	4	4	4	4	4	4	4	4
4	4	4	4	4	4	4	4	4	4	4	4	4	4	4	4	4	4	4	4	4	4	4	4	4	4	4	4	4	4	4	4	4	4	4	4	4	4	4	4	4	4	4	4	4	4	4	4	4	4
4	4	4	4	4	4	4	4	4	4	4	4	4	4	4	4	4	4	4	4	4	4	4	4	4	4	4	4	4	4	4	4	4	4	4	4	4	4	4	4	4	4	4	4	4	4	4	4	4	4
4	4	4	4	4	4	4	4	4	4	4	4	4	4	4	4	4	4	4	4	4	4	4	4	4	4	4	4	4	4	4	4	4	4	4	4	4	4	4	4	4	4	4	4	4	4	4	4	4	4
4	4	4	4	4	4	4	4	4	4	4	4	4	4	4	4	4	4	4	4	4	4	4	4	4	4	4	4	4	4	4	4	4	4	4	4	4	4	4	4	4	4	4	4	4	4	4	4	4	4
4	4	4	4	4	4	4	4	4	4	4	4	4	4	4	4	4	4	4	4	4	4	4	4	4	4	4	4	4	4	4	4	4	4	4	4	4	4	4	2.69481	4	4	4	4	4	4	4	4	4	4
4	4	4	4	4	4	4	4	4	4	4	4	4	4	4	4	4	4	4	4	4	4	4	4	4	4	4	4	4	4	4	4	4	4	4	4	4	4	4	4	4	4	4	4	4	4	4	4	4	4
4	4	4	4	4	4	4	4	4	4	4	4	4	4	4	4	4	4	4	4	4	4	4	4	4	4	4	4	4	4	4	4	4	4	4	4	4	4	4	4	4	4	4	4	4	4	4	4	4	4
4	4	4	4	4	4	4	4	4	4	4	4	4	4	4	4	4	4	4	4	4	4	4	4	4	4	4	4	4	4	4	4	4	4	4	4	4	4	4	4	4	4	4	4	4	4	4	4	4	4
[truncated: 51 more columns]

## Sheet: Fig5G
3.5	3.5	3.5	3.5	3.5	3.5	3.5	3.5	3.5	3.5	3.5	3.5	3.5	3.5	3.5	3.5	3.5	3.5	3.5	3.5	3.5	3.5	3.5	3.5	3.5	3.5	3.5	3.5	3.5	3.5	3.5	3.5	3.5	3.5	3.5	2.26863	3.5	3.5	3.5	3.5	3.5	3.5	3.5	3.5	3.5	3.5	3.5	3.5	3.5	3.5
3.5	3.5	3.5	3.5	3.5	3.5	3.5	3.5	3.5	3.5	3.5	3.5	3.5	3.5	3.5	3.5	3.5	3.5	3.5	3.5	3.5	3.5	3.5	3.5	3.5	3.5	3.5	3.5	3.5	3.5	3.5	3.5	3.5	3.5	3.5	3.5	3.5	3.5	3.5	3.5	3.5	3.5	3.5	3.5	3.5	3.5	3.5	3.5	3.5	3.5
3.5	3.5	3.5	3.5	3.5	3.5	3.5	3.5	3.5	3.5	3.5	3.5	3.5	3.5	3.5	3.5	3.5	3.5	3.5	3.5	3.5	3.5	3.5	3.5	3.5	3.5	3.5	3.5	3.5	3.5	3.5	3.5	3.5	3.5	3.5	3.5	2.26863	3.5	3.5	3.5	3.5	3.5	3.5	3.5	3.5	3.5	3.5	3.5	3.5	3.5
3.5	3.5	3.5	3.5	3.5	3.5	3.5	3.5	3.5	3.5	3.5	3.5	3.5	3.5	3.5	3.5	3.5	3.5	3.5	3.5	3.5	3.5	3.5	3.5	3.5	3.5	3.5	3.5	3.5	3.5	3.5	3.5	3.5	3.5	3.5	3.5	3.5	3.5	3.5	3.5	3.5	3.5	3.5	3.5	3.5	3.5	3.5	3.5	3.5	3.5
3.5	3.5	3.5	3.5	3.5	3.5	3.5	3.5	3.5	3.5	3.5	3.5	3.5	3.5	3.5	2.26863	3.5	3.5	3.5	3.5	3.5	3.5	3.5	3.5	3.5	3.5	3.5	3.5	3.5	2.26863	3.5	3.5	3.5	3.5	3.5	3.5	3.5	3.5	3.5	3.5	3.5	3.5	3.5	3.5	3.5	3.5	1.85554	3.5	3.5	3.5
3.5	3.5	3.5	3.5	3.5	3.5	3.5	3.5	3.5	3.5	2.26863	3.5	3.5	2.26863	3.5	2.26863	2.26863	2.26863	3.5	3.5	3.5	3.5	3.5	2.26863	3.5	2.26863	3.5	3.5	2.26863	3.5	3.5	3.5	3.5	3.5	2.26863	3.5	1.85554	3.5	3.5	3.5	3.5	3.5	2.26863	3.5	3.5	3.5	3.5	3.5	3.5	3.5
3.5	3.5	3.5	3.5	3.5	3.5	3.5	3.5	3.5	3.5	3.5	3.5	3.5	3.5	3.5	3.5	3.5	3.5	2.26863	2.26863	3.5	3.5	2.26863	2.26863	3.5	1.85554	3.5	3.5	2.26863	2.26863	2.26863	3.5	3.5	3.5	3.5	3.5	3.5	3.5	3.5	2.26863	3.5	3.5	3.5	1.85554	3.5	3.5	2.26863	3.5	3.5	2.26863
3.5	3.5	3.5	3.5	3.5	3.5	3.5	3.5	3.5	3.5	3.5	3.5	3.5	2.26863	3.5	3.5	2.26863	3.5	2.26863	3.5	3.5	3.5	2.26863	2.26863	3.5	3.5	1.44245	3.5	3.5	2.26863	3.5	3.5	3.5	1.85554	2.26863	2.26863	1.85554	3.5	3.5	3.5	3.5	3.5	2.26863	3.5	3.5	2.26863	3.5	3.5	3.5	3.5
3.5	3.5	3.5	3.5	3.5	3.5	3.5	3.5	3.5	2.26863	3.5	3.5	3.5	2.26863	2.26863	3.5	2.26863	3.5	2.26863	3.5	3.5	3.5	2.26863	2.26863	2.26863	1.85554	2.26863	3.5	1.6139	2.26863	3.5	3.5	2.26863	1.85554	3.5	3.5	1.85554	2.26863	3.5	3.5	3.5	1.85554	2.26863	3.5	3.5	1.85554	2.26863	3.5	3.5	3.5
3.5	3.5	3.5	3.5	3.5	3.5	3.5	3.5	3.5	3.5	3.5	2.26863	3.5	2.26863	3.5	2.26863	3.5	3.5	1.6139	3.5	2.26863	1.85554	2.26863	2.26863	3.5	1.6139	1.44245	1.85554	2.26863	3.5	1.85554	3.5	1.85554	3.5	2.26863	2.26863	3.5	2.26863	3.5	1.6139	3.5	1.85554	3.5	1.85554	2.26863	1.6139	1.85554	1.85554	2.26863	3.5
3.5	3.5	3.5	3.5	3.5	3.5	3.5	3.5	3.5	2.26863	2.26863	3.5	2.26863	3.5	1.85554	1.85554	3.5	2.26863	1.85554	2.26863	1.85554	2.26863	1.44245	1.85554	2.26863	1.6139	1.85554	3.5	2.26863	2.26863	1.20081	3.5	1.85554	2.26863	2.26863	2.26863	3.5	3.5	2.26863	1.85554	2.26863	3.5	1.85554	3.5	3.5	3.5	3.5	2.26863	3.5	1.85554
3.5	3.5	3.5	3.5	3.5	3.5	3.5	3.5	3.5	3.5	2.26863	3.5	2.26863	3.5	2.26863	3.5	2.26863	2.26863	1.85554	1.6139	1.6139	1.30946	1.6139	1.6139	2.26863	2.26863	1.6139	1.85554	1.44245	1.44245	1.6139	2.26863	1.6139	1.6139	3.5	3.5	1.6139	1.6139	1.85554	2.26863	2.26863	2.26863	2.26863	2.26863	2.26863	1.6139	2.26863	2.26863	1.6139	1.44245
3.5	3.5	3.5	3.5	3.5	3.5	3.5	3.5	3.5	2.26863	3.5	2.26863	3.5	3.5	3.5	1.44245	3.5	1.85554	3.5	1.85554	2.26863	1.85554	1.6139	1.85554	3.5	1.6139	1.02936	1.44245	1.85554	1.6139	3.5	2.26863	1.30946	3.5	3.5	1.85554	1.6139	2.26863	1.6139	1.44245	3.5	1.6139	1.44245	2.26863	3.5	1.85554	1.6139	1.6139	1.44245	1.44245
3.5	3.5	3.5	3.5	3.5	3.5	3.5	3.5	3.5	3.5	1.85554	3.5	3.5	2.26863	1.6139	1.85554	1.6139	2.26863	1.30946	2.26863	1.20081	2.26863	1.30946	1.44245	1.02936	1.10894	0.959164	1.10894	1.44245	1.85554	1.44245	1.30946	3.5	1.44245	2.26863	1.85554	1.6139	1.85554	1.6139	1.6139	1.6139	1.20081	2.26863	2.26863	2.26863	3.5	1.6139	2.26863	1.6139	2.26863
3.5	3.5	3.5	3.5	3.5	3.5	3.5	3.5	3.5	3.5	3.5	2.26863	1.85554	1.85554	1.6139	1.6139	1.10894	2.26863	2.26863	1.6139	1.20081	1.6139	1.44245	1.20081	1.44245	1.44245	1.30946	1.10894	1.6139	1.44245	1.6139	2.26863	1.85554	1.85554	1.44245	1.10894	1.30946	1.6139	2.26863	2.26863	1.44245	1.02936	2.26863	2.26863	1.6139	1.85554	1.44245	1.02936	2.26863	1.6139
3.5	3.5	3.5	3.5	3.5	3.5	3.5	3.5	3.5	3.5	1.85554	1.44245	3.5	2.26863	1.44245	2.26863	1.30946	1.44245	1.30946	0.839572	1.10894	1.10894	0.896373	1.30946	1.20081	1.20081	1.85554	1.30946	1.85554	1.30946	1.6139	2.26863	2.26863	2.26863	1.10894	1.85554	1.85554	1.30946	1.10894	1.6139	1.44245	1.20081	2.26863	1.6139	2.26863	1.10894	1.44245	1.44245	1.85554	1.44245
3.5	3.5	3.5	3.5	3.5	3.5	3.5	3.5	1.85554	1.85554	1.44245	2.26863	1.20081	1.85554	1.44245	1.85554	2.26863	1.6139	0.959164	1.20081	1.85554	1.44245	1.44245	1.6139	1.10894	0.959164	1.6139	1.30946	1.20081	1.10894	0.896373	1.20081	1.44245	1.44245	1.20081	1.85554	1.20081	1.20081	1.85554	0.959164	0.959164	1.44245	0.959164	1.20081	1.44245	2.26863	1.10894	1.10894	0.959164	3.5
3.5	3.5	3.5	3.5	3.5	3.5	3.5	3.5	3.5	3.5	3.5	3.5	2.26863	2.26863	1.30946	1.20081	1.44245	1.02936	1.44245	0.959164	1.6139	1.10894	0.896373	1.20081	1.30946	1.20081	0.740014	1.85554	1.20081	1.20081	1.44245	1.20081	1.6139	0.787716	1.85554	1.02936	1.30946	1.20081	1.10894	1.02936	1.20081	1.10894	1.44245	1.30946	1.10894	1.20081	1.02936	1.10894	1.20081	0.787716
3.5	3.5	3.5	3.5	3.5	3.5	3.5	3.5	1.85554	3.5	3.5	1.85554	1.44245	1.85554	1.44245	1.10894	1.6139	1.10894	1.44245	1.02936	1.10894	1.20081	1.44245	0.787716	0.896373	1.10894	1.10894	0.959164	1.30946	1.20081	1.02936	0.896373	1.20081	0.839572	1.44245	2.26863	0.959164	1.44245	1.20081	1.20081	1.02936	1.10894	1.44245	0.959164	0.787716	1.02936	0.787716	1.20081	1.02936	0.959164
3.5	3.5	3.5	3.5	3.5	3.5	3.5	3.5	2.26863	3.5	1.85554	2.26863	1.6139	1.6139	1.6139	1.02936	1.44245	1.10894	1.02936	1.30946	0.839572	1.02936	1.02936	0.740014	1.20081	1.10894	1.44245	1.10894	0.695848	0.896373	1.10894	0.959164	1.02936	0.787716	1.10894	0.740014	0.896373	0.839572	0.839572	0.896373	0.787716	1.44245	0.959164	0.787716	1.02936	1.30946	1.20081	0.740014	1.20081	1.02936
3.5	3.5	3.5	3.5	3.5	3.5	3.5	2.26863	2.26863	1.6139	1.85554	2.26863	3.5	1.85554	1.20081	1.20081	1.02936	1.6139	0.740014	1.02936	0.896373	0.959164	0.740014	1.20081	0.959164	0.839572	0.740014	1.20081	0.896373	1.10894	1.20081	0.896373	0.787716	0.959164	1.10894	0.959164	1.30946	0.546074	1.10894	1.02936	0.695848	0.695848	1.10894	0.959164	0.896373	0.896373	0.959164	0.787716	0.896373	1.10894
3.5	3.5	3.5	2.26863	3.5	3.5	3.5	3.5	3.5	3.5	2.26863	1.85554	1.20081	1.6139	1.6139	1.10894	1.20081	0.896373	0.896373	0.959164	0.740014	0.839572	0.896373	0.513852	0.839572	1.10894	1.20081	0.896373	0.839572	0.896373	1.02936	1.02936	1.02936	0.839572	0.896373	0.839572	0.787716	0.959164	0.787716	0.695848	0.896373	0.896373	0.787716	0.454207	1.20081	0.839572	0.787716	1.20081	0.695848	1.10894
3.5	3.5	3.5	3.5	3.5	3.5	3.5	3.5	3.5	1.85554	1.85554	1.44245	1.30946	1.85554	1.30946	1.30946	0.959164	0.896373	0.787716	0.483284	0.959164	0.787716	0.616269	0.740014	0.513852	0.839572	0.695848	0.959164	0.740014	0.896373	0.896373	0.896373	0.483284	0.959164	0.546074	0.740014	0.896373	0.896373	1.10894	1.30946	0.959164	0.616269	0.513852	0.839572	0.580139	0.740014	0.740014	0.787716	1.30946	0.787716
3.5	3.5	3.5	3.5	3.5	3.5	3.5	3.5	1.6139	2.26863	1.85554	1.20081	1.30946	1.20081	1.02936	1.10894	1.02936	0.959164	0.839572	0.787716	0.695848	0.654731	0.695848	0.483284	0.654731	0.695848	0.513852	0.740014	1.10894	0.695848	0.787716	0.787716	0.787716	0.616269	0.513852	0.616269	0.787716	0.654731	0.546074	1.10894	0.695848	0.787716	0.839572	0.896373	0.740014	0.546074	0.839572	0.839572	0.787716	0.580139
3.5	3.5	3.5	3.5	3.5	3.5	3.5	1.85554	1.85554	2.26863	3.5	1.30946	1.30946	1.85554	0.896373	0.959164	1.10894	0.896373	0.740014	0.616269	0.839572	0.580139	0.695848	0.654731	0.483284	0.695848	0.896373	0.740014	0.839572	0.839572	0.787716	0.399991	0.787716	0.740014	0.580139	0.896373	0.546074	0.546074	0.483284	0.616269	0.896373	0.513852	0.654731	0.426482	0.896373	0.616269	0.695848	0.787716	0.454207	0.580139
3.5	3.5	3.5	3.5	3.5	3.5	2.26863	2.26863	2.26863	2.26863	1.6139	1.85554	1.44245	1.30946	1.02936	1.02936	0.839572	0.839572	0.546074	0.580139	0.787716	0.740014	0.374627	0.654731	0.695848	0.654731	0.513852	0.654731	0.580139	0.513852	0.454207	0.546074	0.580139	0.513852	0.350299	0.513852	0.616269	0.740014	0.513852	0.787716	0.695848	0.787716	0.513852	0.483284	0.546074	0.740014	0.959164	0.580139	0.896373	0.580139
3.5	3.5	3.5	3.5	3.5	3.5	3.5	3.5	3.5	1.6139	1.85554	1.30946	1.30946	1.44245	0.839572	0.896373	0.787716	0.454207	0.616269	0.787716	0.839572	0.513852	0.546074	0.740014	0.399991	0.654731	0.654731	0.787716	0.740014	0.454207	0.787716	0.787716	0.616269	0.695848	0.374627	0.580139	0.513852	0.261846	0.374627	0.483284	0.839572	0.695848	0.580139	1.10894	0.580139	0.454207	0.616269	0.839572	0.546074	0.513852
3.5	3.5	3.5	3.5	2.26863	2.26863	3.5	1.85554	2.26863	3.5	1.6139	2.26863	1.30946	1.85554	0.959164	1.10894	0.740014	0.695848	0.787716	0.695848	0.787716	0.399991	0.654731	0.513852	0.546074	0.580139	0.546074	0.399991	0.580139	0.740014	0.546074	0.546074	0.399991	0.654731	0.483284	0.513852	0.654731	0.959164	0.454207	0.374627	0.546074	0.616269	0.399991	0.695848	0.374627	0.399991	0.580139	0.454207	0.896373	0.896373
3.5	3.5	3.5	3.5	3.5	3.5	3.5	3.5	1.85554	2.26863	1.02936	1.20081	1.20081	1.30946	1.30946	1.02936	0.959164	1.02936	0.374627	0.454207	0.513852	0.580139	0.483284	0.580139	0.454207	0.787716	0.513852	0.616269	0.580139	0.695848	0.483284	0.695848	0.483284	0.513852	0.654731	0.483284	0.399991	0.616269	0.399991	0.326924	0.580139	0.483284	0.483284	0.580139	0.304433	0.426482	0.695848	0.580139	0.513852	0.374627
3.5	3.5	3.5	3.5	3.5	3.5	2.26863	2.26863	2.26863	2.26863	1.85554	1.6139	1.6139	1.20081	1.44245	1.02936	1.20081	0.616269	0.740014	0.546074	0.483284	0.695848	0.787716	0.695848	0.483284	0.546074	0.483284	0.399991	0.326924	0.513852	0.304433	0.513852	0.483284	0.454207	0.616269	0.426482	0.304433	0.2221	0.184841	0.546074	0.326924	0.513852	0.399991	0.513852	0.483284	0.241642	0.426482	0.426482	0.454207	0.454207
3.5	3.5	3.5	3.5	3.5	3.5	2.26863	2.26863	2.26863	2.26863	2.26863	1.6139	2.26863	1.30946	0.787716	1.02936	0.787716	1.20081	0.580139	0.580139	0.740014	0.350299	0.454207	0.326924	0.399991	0.483284	0.350299	0.399991	0.513852	0.282759	0.2221	0.374627	0.454207	0.184841	0.184841	0.2221	0.350299	0.261846	0.350299	0.2221	0.282759	0.399991	0.454207	0.483284	0.740014	0.546074	0.426482	0.580139	0.483284	0.616269
3.5	3.5	3.5	3.5	3.5	3.5	3.5	3.5	3.5	3.5	1.85554	1.20081	1.85554	0.959164	0.695848	0.839572	0.695848	0.787716	0.513852	0.513852	0.261846	0.546074	0.546074	0.580139	0.426482	0.483284	0.959164	0.454207	0.616269	0.426482	0.454207	0.483284	0.0701942	0.282759	0.483284	0.399991	0.454207	0.203179	0.399991	0.374627	0.580139	0.695848	0.304433	0.546074	0.374627	0.654731	0.654731	0.513852	0.374627	0.654731
3.5	3.5	3.5	3.5	3.5	3.5	3.5	3.5	3.5	2.26863	1.85554	1.85554	1.44245	1.6139	1.10894	0.740014	0.695848	0.896373	0.654731	0.695848	0.350299	0.580139	0.483284	0.326924	0.454207	0.740014	0.454207	0.483284	0.304433	0.399991	0.350299	0.399991	0.100763	0.282759	0.513852	0.304433	0.483284	0.132985	0.241642	0.326924	0.0701942	0.695848	0.513852	0.513852	0.426482	0.454207	0.282759	0.399991	0.616269	0.483284
3.5	3.5	3.5	3.5	3.5	3.5	3.5	2.26863	3.5	1.6139	2.26863	1.44245	1.30946	1.10894	1.30946	1.20081	1.20081	0.580139	0.454207	0.580139	0.374627	0.513852	0.326924	0.426482	0.616269	0.454207	0.399991	0.483284	0.304433	0.374627	0.374627	0.326924	0.350299	0.149774	0.167049	0.513852	0.326924	0.326924	0.350299	0.241642	0.374627	0.513852	0.203179	0.399991	0.616269	0.580139	0.426482	0.483284	0.399991	0.350299
3.5	3.5	3.5	3.5	3.5	3.5	3.5	1.85554	2.26863	3.5	1.44245	1.6139	1.85554	0.959164	0.787716	0.896373	0.896373	0.513852	0.616269	0.483284	0.513852	0.426482	0.454207	0.454207	0.580139	0.483284	0.695848	0.374627	0.350299	0.350299	0.241642	0.2221	0.304433	0.282759	0.261846	0.304433	0.399991	0.167049	0.350299	0.132985	0.350299	0.374627	0.483284	0.184841	0.454207	0.326924	0.326924	0.399991	0.374627	0.839572
3.5	3.5	3.5	3.5	3.5	2.26863	2.26863	2.26863	3.5	3.5	1.85554	2.26863	1.02936	1.44245	1.20081	1.30946	0.787716	0.654731	0.787716	0.454207	0.654731	0.896373	0.695848	0.695848	0.695848	0.616269	0.513852	0.454207	0.654731	0.350299	0.326924	0.304433	0.149774	0.167049	0.261846	0.326924	0.2221	0.282759	0.100763	0.326924	0.304433	0.454207	0.399991	0.546074	0.132985	0.454207	0.787716	0.426482	0.513852	0.654731
3.5	3.5	3.5	3.5	3.5	1.85554	2.26863	1.85554	2.26863	1.6139	2.26863	1.85554	1.20081	1.10894	1.10894	1.20081	0.839572	0.616269	0.546074	0.896373	0.654731	0.959164	0.896373	0.483284	0.546074	0.282759	0.454207	0.513852	0.580139	0.116656	0.374627	0.304433	0.116656	0.454207	0.2221	0.184841	0.454207	0.304433	0.100763	0.426482	0.326924	0.616269	0.399991	0.304433	0.184841	0.580139	0.580139	0.546074	0.740014	0.616269
3.5	3.5	3.5	3.5	3.5	3.5	2.26863	2.26863	1.85554	3.5	2.26863	1.44245	1.44245	1.30946	0.787716	0.896373	0.654731	1.02936	0.616269	0.483284	0.695848	0.654731	0.616269	0.580139	0.483284	0.654731	0.454207	0.483284	0.374627	0.426482	0.184841	0.483284	0.241642	0.2221	0.261846	0.132985	0.203179	0.350299	0.399991	0.350299	0.374627	0.2221	0.787716	0.261846	0.513852	0.399991	0.426482	0.580139	0.483284	0.740014
3.5	3.5	2.26863	3.5	3.5	3.5	3.5	1.85554	2.26863	1.85554	2.26863	2.26863	1.85554	1.6139	1.85554	0.896373	1.20081	0.695848	0.896373	0.580139	0.654731	0.616269	0.616269	0.896373	0.546074	0.580139	0.350299	0.304433	0.454207	0.513852	0.203179	0.326924	0.100763	0.304433	0	0.261846	0.326924	0.304433	0.149774	0.184841	0.350299	0.513852	0.426482	0.483284	0.483284	0.513852	0.426482	0.546074	0.695848	0.580139
3.5	3.5	3.5	3.5	3.5	3.5	3.5	3.5	3.5	2.26863	1.85554	3.5	1.20081	1.6139	1.44245	1.20081	1.02936	0.787716	0.695848	0.654731	0.839572	0.616269	0.399991	0.740014	0.546074	0.326924	0.399991	0.350299	0.304433	0.203179	0.304433	0.399991	0.282759	0.132985	0.149774	0.261846	0.261846	0.304433	0.513852	0.350299	0.399991	0.654731	0.374627	0.483284	0.426482	0.580139	0.695848	0.399991	0.546074	0.616269
3.5	3.5	3.5	3.5	3.5	3.5	3.5	3.5	2.26863	1.6139	2.26863	2.26863	1.85554	1.6139	0.839572	1.02936	1.20081	1.02936	0.695848	0.959164	0.740014	0.513852	0.654731	0.740014	0.304433	0.616269	0.241642	0.513852	0.654731	0.454207	0.184841	0.399991	0.326924	0.374627	0.374627	0.167049	0.116656	0.261846	0.261846	0.426482	0.454207	0.454207	0.261846	0.654731	0.513852	0.546074	0.546074	0.616269	0.839572	0.454207
[truncated: 60 more rows]
[truncated: 51 more columns]

## Sheet: Fig5H
4	4	4	4	4	4	4	4	4	4	4	4	4	4	4	4	4	4	4	4	4	4	4	4	4	4	4	4	4	4	4	4	4	4	4	4	4	4	4	4	4	4	4	4	4	4	4	4	4	4
4	4	4	4	4	4	4	4	4	4	4	4	4	4	4	4	4	4	4	4	4	4	4	4	4	4	4	4	4	4	4	4	4	4	4	4	4	4	4	4	4	4	4	4	4	4	4	4	4	4
[truncated: 99 more rows]
[truncated: 51 more columns]

## Sheet: Fig5I
3.5	3.5	3.5	3.5	3.5	3.5	3.5	3.5	3.5	3.5	3.5	3.5	3.5	3.5	3.5	3.5	3.5	3.5	3.5	3.5	3.5	3.5	3.5	3.5	3.5	3.5	3.5	3.5	3.5	3.5	3.5	3.5	3.5	3.5	3.5	3.5	3.5	3.5	2.26863	3.5	3.5	3.5	3.5	3.5	3.5	3.5	2.26863	3.5	2.26863	2.26863
[truncated: 100 more rows]
[truncated: 51 more columns]

[truncated: 17 more sheets: Fig5J, Fig5K, Fig5L, Fig5M, Fig5N, Table 2, Fig8, Fig9B, Fig9C, Fig9D, Fig9E, Fig9F, Fig10A, Fig10B, Fig10C, Fig10D, Fig10E]
